# Supplementary material for: Characterization of A π–π stacking cocrystal of 4-nitrophthalonitrile directed toward application in photocatalysis
Source: PubMed Central journal article supplement (PMC10873295; doi:10.1038/s41467-024-45686-1), 2024-02-16
Supplement: 41467_2024_45686_MOESM1_ESM.pdf [file 41467_2024_45686_MOESM1_ESM.pdf]

## Supplementary Information

### Characterization of A $\pi$ - $\pi$ Stacking Cocrystal of 4-Nitrophthalonitrile

#### Directed Toward Application in Photocatalysis

Ting Xue,<sup>a</sup> Cheng Ma,<sup>b</sup> Le Liu,<sup>a</sup> Chunhui Xiao,<sup>\*a</sup> Shao-Fei Ni,<sup>\*b</sup> Rong Zeng<sup>\*a</sup>

<sup>a</sup> School of Chemistry, Xi'an Jiaotong University, Xi'an 710049, P. R. China

<sup>b</sup> Department of Chemistry and Key Laboratory for Preparation and Application of Ordered Structural Materials of Guangdong, Shantou University, Shantou, 515063, Guangdong, P. R. China

Corresponding author: [chunhuixiao@xjtu.edu.cn](mailto:chunhuixiao@xjtu.edu.cn); [sfni@stu.edu.cn](mailto:sfni@stu.edu.cn); [rongzeng@xjtu.edu.cn](mailto:rongzeng@xjtu.edu.cn)

### Table of Contents

|                                                          |           |
|----------------------------------------------------------|-----------|
| General Information                                      | S2-S3     |
| Optimization of the reaction conditions                  | S4-S6     |
| Supplementary Table 4. The unsuccessful e-rich aromatics | S7        |
| Preparation of Starting Materials                        | S8        |
| Characterization of the cocrystal                        | S9-S11    |
| Alkylation of e-rich aromatic                            | S12-S27   |
| Mechanistic Studies for arene activation                 | S28-S37   |
| Oxidation of e-rich aromatics                            | S38-S41   |
| Hydrocarboxylation of alkenes                            | S42-S47   |
| Mechanistic studies of formate activation                | S48-S49   |
| Mechanism of reductive hydrocarboxylation of alkynes     | S50       |
| Synthetic potentials                                     | S51-S52   |
| Spectra                                                  | S53-S134  |
| References                                               | S135-S137 |

**Materials:** PhH were distilled from Na/benzophenone before use. Benzylidenemalonitril was purchased from Adamas-beta. Other commercially available chemicals were purchased and used without additional purification unless noted otherwise. Infrared spectra were recorded on a Nicolet iS5 using neat thin film technique. High-resolution mass spectra (HRSM) were obtained on a Waters I-Class VION IMS QToF and are reported as m/z (relative intensity). Accurate masses are reported for the molecular ion  $[M+Na]^+$ ,  $[M+H]^+$ ,  $[M-OH]^+$ ,  $[M-H]^-$  or  $[M]^+$ .  $^1H$  NMR spectra were recorded on a Bruker-400 MHz or Bruker-600 MHz spectrometer,  $^{13}C$  NMR spectra were recorded at 101 MHz or 151 MHz, and  $^{19}F$  NMR spectra were recorded at 376 MHz. Unless otherwise noted, all spectra were acquired in  $CDCl_3$ . Chemical shifts are reported in parts per million (ppm,  $\delta$ ), downfield from tetramethylsilane (TMS,  $\delta = 0.00$  ppm) and are referenced to residual solvent ( $CDCl_3$ ,  $\delta = 7.26$  ppm ( $^1H$ ) and 77.00 ppm ( $^{13}C$ )). Coupling constants were reported in Hertz (Hz). Data for NMR spectra were reported as follows: s = singlet, d = doublet, t = triplet, q = quartet, dd = doublet of doublets, m = multiplet, coupling constant (Hz), and integration.

The alkenes including **1ac**,<sup>1</sup> **2b**,<sup>2</sup> **2c**,<sup>3</sup> **2d**,<sup>4</sup> **2f**,<sup>2</sup> **2g**,<sup>2</sup> **2h**,<sup>2</sup> **2i**,<sup>2</sup> **2j**,<sup>5</sup> **2l**,<sup>6</sup> **2m**,<sup>2</sup> **2n**,<sup>7</sup> **2o**,<sup>8</sup> **2p**,<sup>9</sup> **2q**<sup>10</sup>, **10b**<sup>11</sup> were known and were prepared according to the known literature.

The LED light (100 W, emitting area: 30 × 30 mm) was assembled using the 390-395 nm chips purchased from GuangHong Chips. The emission spectra of the LED light is shown below (**Supplementary Figure 1**) and wavelength of peak intensity is 390-395 nm. The material of the reaction vessels is regular borosilicate glass. The distance from the light source to the reaction vessel is 5 cm, and the temperature was measured to be about 29 °C. (**Supplementary Figure 2**).

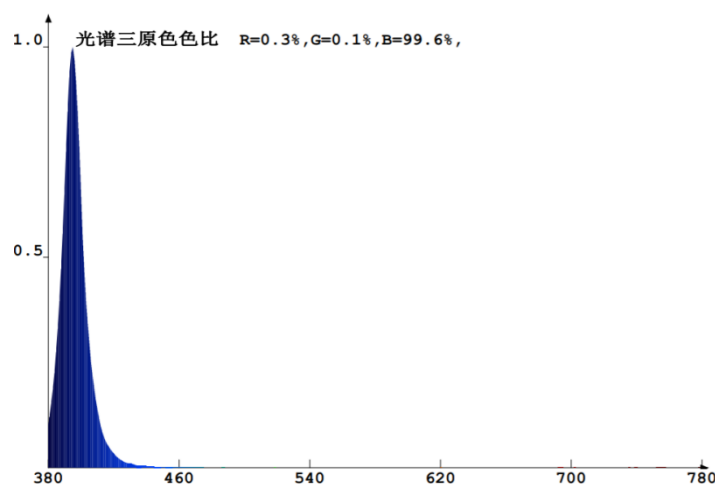

**Supplementary Figure 1: The emission spectrum of the LED light.** Emission peak is around 390-395 nm.

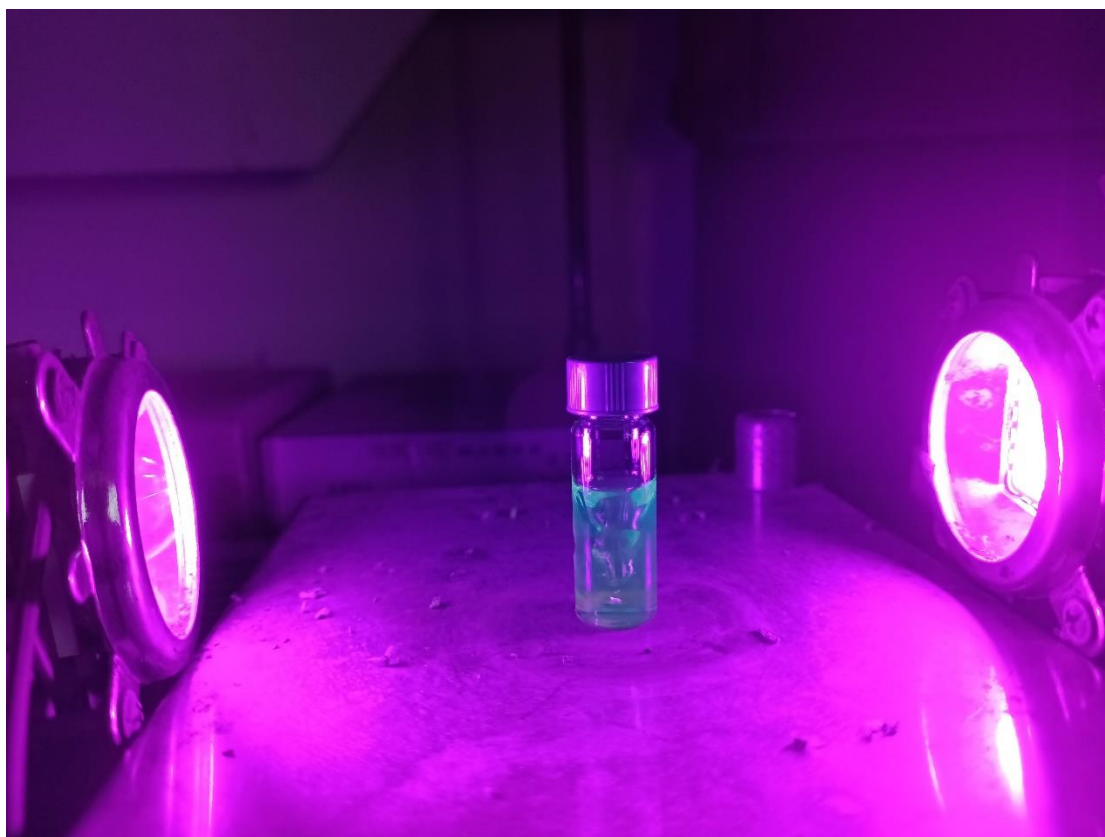

**Supplementary Figure 2: The setting-up reaction.** The material of the reaction vessels is regular borosilicate glass. The distance from the light source to the reaction vessel is 5 cm.

## Optimization of reaction conditions

Supplementary Table 1. Optimization of the alkylation reaction<sup>a,b</sup>

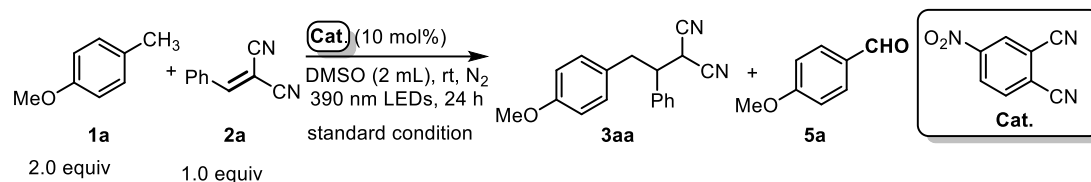

| Entry           | Variation from the standard conditions              | Yield of <b>3aa</b> (%) <sup>b</sup> | Yield of <b>9a</b> (%) <sup>b</sup> |
|-----------------|-----------------------------------------------------|--------------------------------------|-------------------------------------|
| 1               | none                                                | 75(71) <sup>c</sup>                  | 2                                   |
| 2               | No <b>Cat.</b>                                      | 27                                   | 0                                   |
| 3               | No LEDs                                             | 0                                    | 0                                   |
| 4               | 20 mol% of <b>Cat.</b> was used                     | 72                                   | 5                                   |
| 5               | 5 mol% of <b>Cat.</b> was used                      | 61                                   | 1                                   |
| 6               | 3.0 equiv of <b>1a</b> were used                    | 72                                   | 2                                   |
| 7               | 1.5 equiv of <b>1a</b> were used                    | 52                                   | 1                                   |
| 8               | 1.0 equiv of <b>1a</b> and 2.0 equiv of <b>2a</b>   | 58                                   | <1%                                 |
| 9               | 365 nm LEDs were used                               | 23                                   | <1%                                 |
| 10              | 425 nm LEDs were used                               | 9                                    | <1%                                 |
| 11              | 460 nm LEDs were used                               | 20                                   | <1%                                 |
| 12              | 460 nm LEDs were used and no <b>cat.</b>            | 2                                    | 0                                   |
| 13              | white light LEDs were used                          | 3                                    | <1%                                 |
| 14              | DMF instead of DMSO                                 | 6                                    | 0                                   |
| 15              | DMA instead of DMSO                                 | 0                                    | 0                                   |
| 16              | DMP instead of DMSO                                 | 0                                    | 0                                   |
| 17              | Benzene instead of DMSO                             | 25                                   | 29                                  |
| 18              | DME instead of DMSO                                 | 22                                   | 1                                   |
| 19              | MeOH instead of DMSO                                | 22                                   | 1                                   |
| 20              | Cl <sub>3</sub> CCH <sub>2</sub> OH instead of DMSO | 17                                   | 0                                   |
| 21 <sup>d</sup> | BHT was added                                       | 14                                   | 0                                   |

<sup>a</sup> The standard reactions were conducted with **1a** (0.4 mmol), **2a** (0.2 mmol), 4-nitrophthalonitrile (0.02 mmol) in DMSO (2 mL) under nitrogen atmosphere at room temperature with 390 nm LEDs irradiation for 24 h <sup>b</sup> Yields were determined by <sup>1</sup>H NMR analysis of the crude product using 1,3,5-trimethoxybenzene as internal standard. <sup>c</sup>The yield in the parenthesis is based on isolation. <sup>d</sup>1.0 equiv Butylated Hydroxytoluene (BHT)

**Supplementary Table 2. Optimization of the oxidation reaction<sup>a,b</sup>**

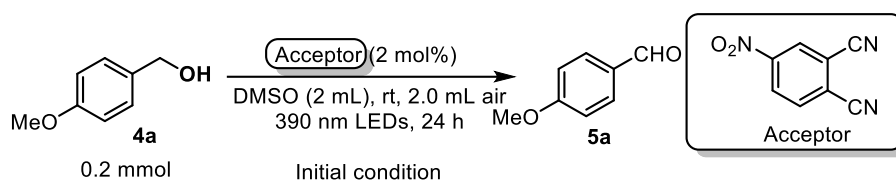

| Entry | Variation from the initial conditions                                   | Yield (%)                         |
|-------|-------------------------------------------------------------------------|-----------------------------------|
| 1     | none                                                                    | 48 <sup>b</sup>                   |
| 2     | w/o catalyst                                                            | 7 <sup>c</sup>                    |
| 3     | w/o LED and prolonged to 72 hours                                       | 0 <sup>b</sup>                    |
| 4     | Benzyl alcohol was used instead of <b>4a</b>                            | <5% <sup>c</sup>                  |
| 5     | reaction time prolonged to 72 hours                                     | 85 <sup>b</sup>                   |
| 6     | oxygen atmosphere                                                       | 41 <sup>c</sup>                   |
| 7     | nitrogen atmosphere                                                     | 10 <sup>c</sup>                   |
| 8     | 4-nitrophthalonitrile (10 mol%) was used                                | 73 <sup>c</sup>                   |
| 9     | 4-nitrophthalonitrile (10 mol%) was used and reaction time was 48 hours | 84 <sup>c</sup> (81) <sup>d</sup> |

<sup>a</sup> The reactions were conducted with **4a** (0.2 mmol) and 4-nitrophthalonitrile (0.0004 mmol) in DMSO (2 mL) under 2.0 mL air atmosphere at room temperature with 390 nm LEDs irradiation for 24 h. <sup>b</sup> Yields were determined by GC analysis of the crude product using decane as internal standard. <sup>c</sup> Yields were determined by <sup>1</sup>H NMR analysis of the crude product using mesitylene as internal standard. <sup>d</sup> The yield in the parenthesis is based on isolation.

**Supplementary Table 3. Optimization of the alylation reaction condition<sup>a,b</sup>**

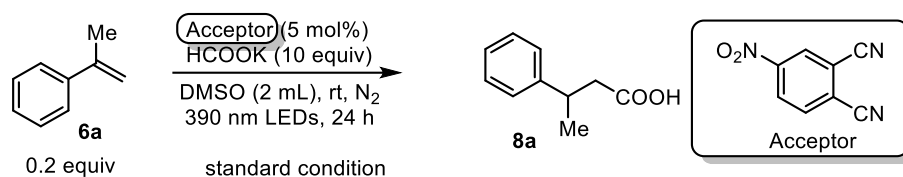

| Entry           | Variation from the standard conditions   | Yield (%) <sup>b</sup> |
|-----------------|------------------------------------------|------------------------|
| 1               | none                                     | 82(68) <sup>c</sup>    |
| 2               | w/o catalyst                             | 0                      |
| 3               | w/o LED                                  | 0                      |
| 4               | HCOOH instead of HCOOK                   | 0                      |
| 5               | HCOOCs instead of HCOOK                  | 82                     |
| 6               | HCOOCs·H <sub>2</sub> O instead of HCOOK | 84                     |
| 7               | HCOOLi instead of HCOOK                  | 46                     |
| 8               | HCOONH <sub>4</sub> instead of HCOOK     | N.R.                   |
| 9               | H <sub>2</sub> O (5.0 equiv.) was added  | 84                     |
| 10              | H <sub>2</sub> O (7.0 equiv.) was added  | 73                     |
| 11              | DMAc instead of DMSO                     | 0                      |
| 12              | DMF instead of DMSO                      | 0                      |
| 13 <sup>d</sup> | BHT was added                            | 0                      |

<sup>a</sup> The reactions were conducted with **6a** (0.2 mmol), potassium formate (2.0 mmol) and 4-nitrophthalonitrile (0.004 mmol) in DMSO (2 mL) under nitrogen atmosphere at room temperature with 390 nm LED irradiation for 24 h <sup>b</sup> Yields were determined by <sup>1</sup>H NMR analysis of the crude product using dibromomethane as internal standard. <sup>c</sup> The yield in the parenthesis is based on isolation. <sup>d</sup> 1.0 equiv Butylated Hydroxytoluene (BHT)

Supplementary Table 4. The unsuccessful e-rich aromatics<sup>a,b</sup>

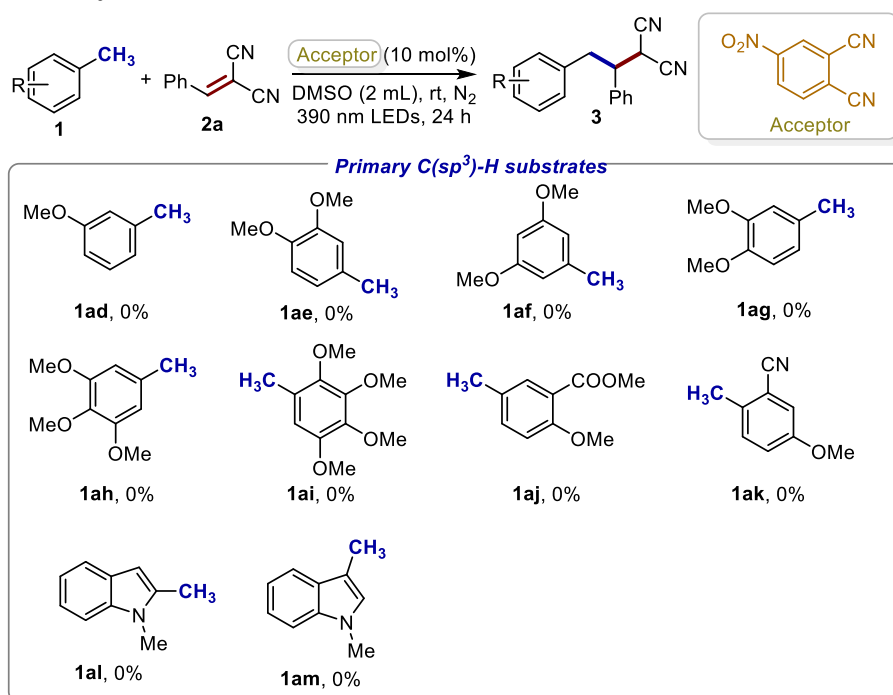

<sup>a</sup> The reactions were conducted with **1** (0.4 mmol), **2a** (0.2 mmol), 4-nitrophthalonitrile (0.2 mmol) in DMSO (2 mL) under nitrogen atmosphere at room temperature with 390 nm LED irradiation for 24 h. <sup>b</sup> All yields were calculated after isolation.

## Preparation of Starting Materials

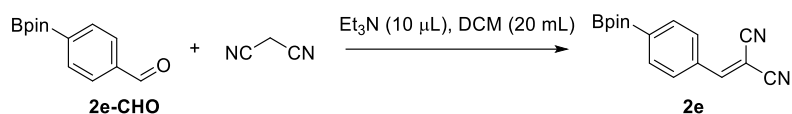

**Typical Procedure 1:** To a solution of **2e-CHO** (1.3918 g, 6.0 mmol) and  $\text{CH}_2(\text{CN})_2$  (0.6 mL,  $d = 1.049$  g/mL, 9.0 mmol) in dry  $\text{CH}_2\text{Cl}_2$  (20 mL) was added  $\text{Et}_3\text{N}$  (10  $\mu\text{l}$ ,  $d = 0.728$  g/mL, 7.28 mg, 0.07 mmol). The resulting mixture was stirring for 24 h at room temperature. After removal of the solvent, the residue was purified by column chromatography on silica gel to afford compound **2e** (0.7797 g, 46%) (eluent: DCM/petroleum ether = 1/1): pale red solid. mp. 110.4-111.4 °C (Hexane/ethyl acetate).  $^1\text{H}$  NMR (400 MHz,  $\text{CDCl}_3$ ) 7.94 (d,  $J = 8.0$  Hz, 2 H, Ar-H), 7.86 (d,  $J = 8.4$  Hz, 2 H, Ar-H), 7.78 (s, 1 H, CH), 1.36 (s, 12 H,  $\text{CH}_3 \times 4$ ).  $^{13}\text{C}$  NMR (101 MHz,  $\text{CDCl}_3$ )  $\delta$  159.9, 135.6, 132.8, 129.6, 113.6, 112.4, 84.5, 83.6, 24.9. IR  $\nu$  (neat,  $\text{cm}^{-1}$ ) 2229. HRMS (ESI)  $m/z$ :  $[\text{M} + \text{K}]^+$  Calcd for  $\text{C}_{16}\text{H}_{17}\text{BN}_2\text{O}_2\text{K}$  319.1015; found 319.1028.

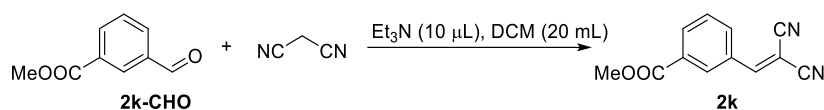

Following Typical Procedure 1, the reaction of **2k-CHO** (0.9842 g, 0.4 mmol),  $\text{CH}_2(\text{CN})_2$  (0.6 mL,  $d = 1.049$  g/mL, 9.0 mmol), and  $\text{Et}_3\text{N}$  (10  $\mu\text{l}$ ,  $d = 0.728$  g/mL, 7.28 mg, 0.07 mmol) in DCM (20.0 mL) for 12 h afforded **2k** (0.2245 g, 18%) (eluent: DCM/petroleum ether = 2/1): white solid. mp. 120.1-120.8 °C (Hexane/ethyl acetate).  $^1\text{H}$  NMR (400 MHz,  $\text{CDCl}_3$ )  $\delta$  8.46-8.43 (m, 1 H, Ar-H), 8.28 (d,  $J = 7.6$  Hz, 1 H, Ar-H), 8.21 (d,  $J = 8.0$  Hz, 1 H, Ar-H), 7.84 (s, 1 H, CH), 7.69-7.62 (m, 1 H, Ar-H), 3.97 (s, 3 H,  $\text{CH}_3$ ).  $^{13}\text{C}$  NMR (101 MHz,  $\text{CDCl}_3$ )  $\delta$  165.4, 158.8, 135.0, 133.4, 132.4, 131.7, 131.1, 129.9, 113.2, 112.1, 84.5, 52.7. IR  $\nu$  (neat,  $\text{cm}^{-1}$ ) 2227, 1713. HRMS (ESI)  $m/z$ :  $[\text{M} + \text{NH}_4]^+$  Calcd for  $\text{C}_{12}\text{H}_{12}\text{N}_3\text{O}_2$  230.0924; found 230.0920.



## Characterization of the cocrystal of 1,3,5-trimethoxybenzen and 4-nitrophthalonitrile

### 1. X-ray Crystallography

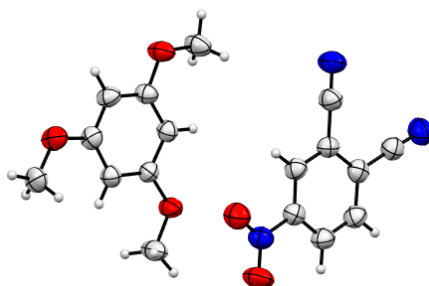

Crystal data for  $C_{17}H_{15}N_3O_5$ ,  $M = 341.32$ , triclinic, space group P -1, final R indices [ $I > 2\sigma(I)$ ],  $R_1 = 0.0707$ ,  $wR_2 = 0.2204$ ; R indices (all data),  $R_1 = 0.0791$ ,  $wR_2 = 0.2258$ ;  $a = 7.6134(5) \text{ \AA}$ ,  $b = 10.1552(8) \text{ \AA}$ ,  $c = 10.7929(9) \text{ \AA}$ ,  $\alpha = 79.319(3)^\circ$ ,  $\beta = 83.593(3)^\circ$ ,  $\gamma = 83.997(3)^\circ$ ,  $V = 811.87(11) \text{ \AA}^3$ ,  $T = 300(2) \text{ K}$ ,  $Z = 2$ , reflection collected/unique 14884 / 2833 ( $R_{int} = 0.0420$ ), number of observations [ $>2\sigma(I)$ ] 2833, parameters: 230. CCDC 2277272 contains supplementary crystallographic data for structure of co-crystal of 1,3,5-trimethoxybenzen and 4-nitrophthalonitrile. These data can be obtained free of charge from The Cambridge Crystallographic Data Centre (CCDC) via [www.ccdc.cam.ac.uk/data\\_request/cif](http://www.ccdc.cam.ac.uk/data_request/cif).

### 2. UV-Vis absorption

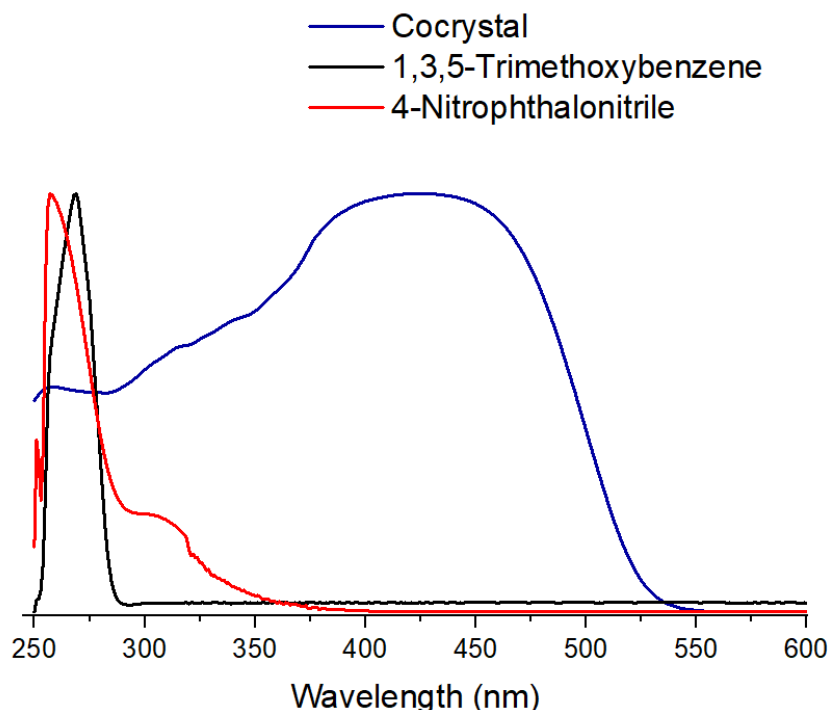

**Supplementary Figure 3: The UV-Vis absorption spectra.** The solution of 4-nitrophthalonitrile (0.1 mM) and 1,3,5-trimethoxybenzene (2.0 mM) in DMSO and the powder of cocystal were measured using PE Lambda950.

### 3. DFT calculations

All calculations were performed using Gaussian 16, Revision A.03 package with CAM-B3LYP/6-31G(d) level of theory.<sup>12,13</sup> Time-dependent density functional theory (TD-DFT) calculation was carried out at TD-CAM-B3LYP/6-311G(d,p) level for the excited states. Hole-electron, and inter-fragment charge transfer (IFCT) analysis was performed using Multiwfn 3.8(dev) software package.<sup>14,15</sup>

#### Cartesian coordinates of the crystal structure:

##### EDA

E = -1196.19001100 a.u.

0 1

|   |            |             |             |
|---|------------|-------------|-------------|
| O | 5.95860000 | 9.66130000  | 6.49560000  |
| O | 5.14580000 | 7.67190000  | 6.32140000  |
| N | 5.75900000 | 8.63530000  | 5.86850000  |
| N | 6.20820000 | 5.10450000  | 1.20050000  |
| N | 7.97620000 | 8.33460000  | -0.54060000 |
| C | 6.27990000 | 8.53990000  | 4.49690000  |
| C | 6.89960000 | 9.63960000  | 3.94680000  |
| H | 7.01240000 | 10.41820000 | 4.44300000  |
| C | 7.34950000 | 9.56330000  | 2.64810000  |
| H | 7.77100000 | 10.29640000 | 2.26080000  |
| C | 7.17760000 | 8.40350000  | 1.91640000  |
| C | 6.55950000 | 7.29250000  | 2.50450000  |
| C | 6.10640000 | 7.36000000  | 3.81060000  |
| H | 5.69650000 | 6.62900000  | 4.21320000  |
| C | 6.36470000 | 6.07040000  | 1.76860000  |
| C | 7.62520000 | 8.34790000  | 0.54690000  |
| O | 1.98880000 | 5.38770000  | 3.18870000  |
| O | 2.75520000 | 9.67110000  | 5.11350000  |
| O | 3.89940000 | 9.03750000  | 0.65890000  |
| C | 2.44680000 | 6.67130000  | 3.03030000  |
| C | 2.94190000 | 7.14760000  | 1.82870000  |
| H | 2.98400000 | 6.60270000  | 1.07600000  |
| C | 3.37500000 | 8.46620000  | 1.78650000  |
| C | 3.28960000 | 9.28900000  | 2.88250000  |
| H | 3.56640000 | 10.17510000 | 2.83080000  |
| C | 2.78610000 | 8.78000000  | 4.06510000  |
| C | 2.36070000 | 7.47110000  | 4.16110000  |
| H | 2.02700000 | 7.13380000  | 4.96150000  |
| C | 2.14920000 | 9.25500000  | 6.32460000  |
| H | 2.05330000 | 10.01020000 | 6.91000000  |

|   |            |            |             |
|---|------------|------------|-------------|
| H | 1.28420000 | 8.88310000 | 6.13820000  |
| H | 2.69950000 | 8.59130000 | 6.74610000  |
| C | 2.14020000 | 4.51290000 | 2.06740000  |
| H | 1.86060000 | 3.62790000 | 2.31180000  |
| H | 1.60020000 | 4.82950000 | 1.33920000  |
| H | 3.06150000 | 4.49460000 | 1.79760000  |
| C | 4.06210000 | 8.23100000 | -0.49840000 |
| H | 3.20180000 | 7.94580000 | -0.81290000 |
| H | 4.50150000 | 8.74010000 | -1.18360000 |
| H | 4.59460000 | 7.46260000 | -0.27980000 |

## 6. EPR spectra

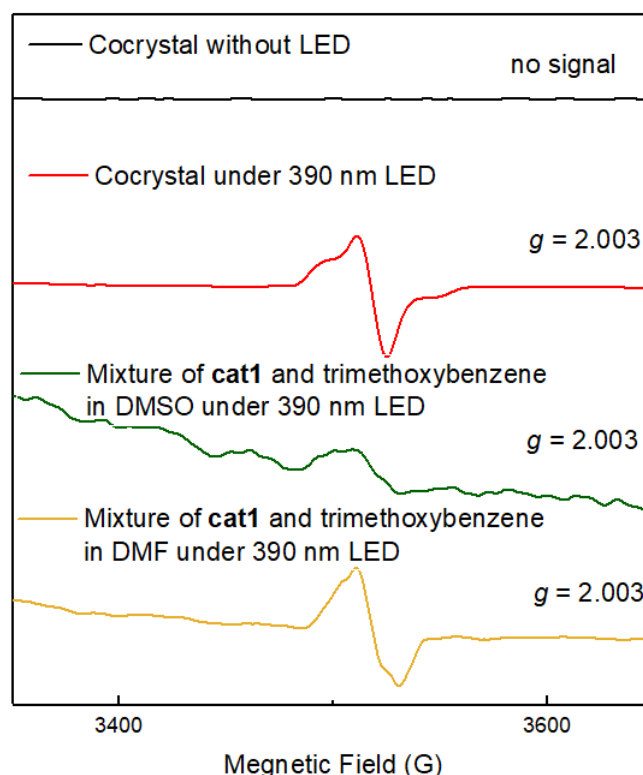

**Supplementary Figure 4. EPR spectra.** EPR spectra of the cocystal and solution of 4-nitrophthalonitrile and 1,3,5-trimethoxybenzene in the absence or presence of 390 nm light.

The cocystal of 4-nitrophthalonitrile and 1,3,5-trimethoxybenzene was used as starting sample, no radical signal was recorded without irradiation. Interestingly, once the sample was irradiated with 390 nm light (ex situ of the magnet), a build-up of a radical signal, assigned as a carbon radical ( $g = 2.003$ ), was observed in the EPR spectrum. When the saturated solution of 4-nitrophthalonitrile and 1,3,5-trimethoxybenzene in DMSO was examined under irradiation, a similar signal could be obtained, however, in a relatively low resolution, probably due to the low concentration of radical species. Delightedly, a much higher resolution signal could be obtained by switching the solvent to DMF. These results indicated that the electron transfer might indeed proceed between 4-nitrophthalonitrile and 1,3,5-trimethoxybenzene to generate the carbon radical species under the irradiation of 390 nm light.

## C-H Alkylation of e-rich aromatic

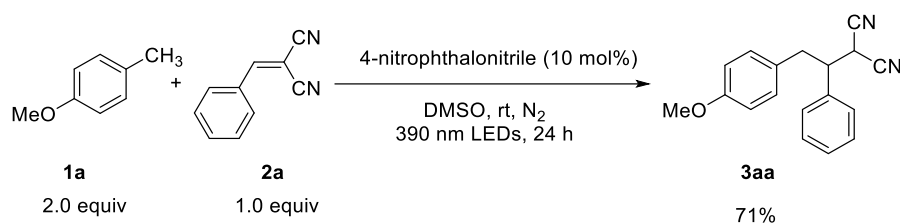

**Typical Procedure 2:** To a 4 mL vial were added **1a** (48.6 mg, 0.4 mmol), **2a** (30.6 mg, 0.2 mmol), and 4-nitrophthalonitrile (3.5 mg, 0.02 mmol) in DMSO (2.0 mL) in an N<sub>2</sub> glovebox. The vial was sealed and transferred out of glovebox. Under irradiation at 390 nm LEDs, the resulting mixture was stirred for 24 hours at rt. Saturated brine was then added and the aqueous layer was extracted with ethyl acetate (10 mL × 3). Evaporation and flash chromatography on silica gel afforded **3aa** (53.4 mg, 71%) (eluent: petroleum ether/ethyl acetate = 100/1 to 20/1): oil. <sup>1</sup>H NMR (400 MHz, CDCl<sub>3</sub>) δ 7.49-7.36 (m, 5 H, Ar-H), 7.11 (d, *J* = 8.4 Hz, 2 H, Ar-H), 6.86 (d, *J* = 8.8 Hz, 2 H, Ar-H), 3.86 (d, *J* = 5.2 Hz, 1 H, CH), 3.80 (s, 3 H, CH<sub>3</sub>), 3.45-3.38 (m, 1 H, CH), 3.26-3.16 (m, 2 H, CH<sub>2</sub>). <sup>13</sup>C NMR (101 MHz, CDCl<sub>3</sub>) δ 158.9, 136.4, 129.9, 129.1, 129.0, 128.4, 128.0, 114.4, 112.1, 111.4, 55.3, 48.4, 37.6, 28.3. IR ν (neat, cm<sup>-1</sup>) 3064, 2254. The <sup>1</sup>H NMR spectra are matching with the known literature.<sup>16</sup>

### 1 gram scale reaction:

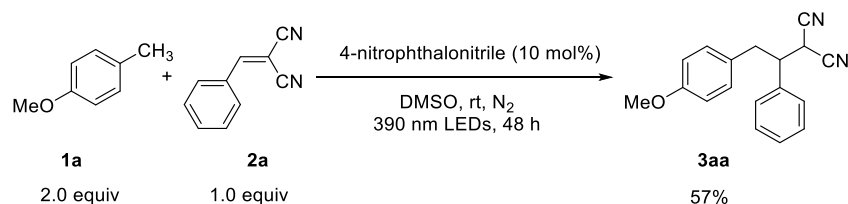

Following Typical Procedure 2, the reaction of **1a** (2.5 mL, *d* = 0.969 g/mL, 2.4225 g, 19.9 mmol), **2a** (1.5405 g, 10.0 mmol), and 4-nitrophthalonitrile (0.1733 g, 1.0 mmol) in DMSO (40.0 mL) afforded **3aa** (1.5653 g, 57%) (eluent: petroleum ether/ethyl acetate = 100/1 to 20/1): oil. <sup>1</sup>H NMR (400 MHz, CDCl<sub>3</sub>) δ 7.46-7.36 (m, 5 H, Ar-H), 7.11 (d, *J* = 8.4 Hz, 2 H, Ar-H), 6.86 (d, *J* = 8.4 Hz, 2 H, Ar-H), 3.86 (d, *J* = 5.2 Hz, 1 H, CH), 3.80 (s, 3 H, CH<sub>3</sub>), 3.45-3.37 (m, 1 H, CH), 3.26-3.16 (m, 2 H, CH<sub>2</sub>).

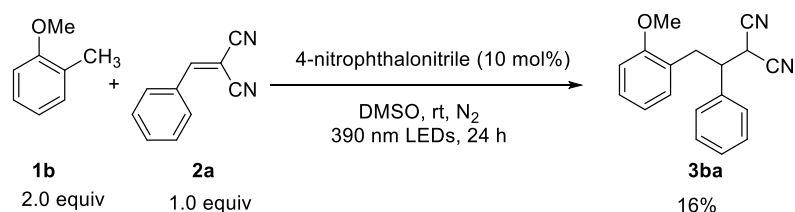

Following Typical Procedure 2, the reaction of **1b** (48.5 mg, 0.4 mmol), **2a** (30.9 mg, 0.2 mmol), and 4-nitrophthalonitrile (3.3 mg, 0.02 mmol) in DMSO (2.0 mL) afforded **3ba** (9.1 mg, 16%) (eluent: petroleum ether/ethyl acetate = 100/1 to 10/1): colorless oil. <sup>1</sup>H NMR (400 MHz, CDCl<sub>3</sub>) δ 7.45-7.34 (m, 5 H, Ar-H), 7.31-7.25 (m, 1 H, Ar-H), 7.13-7.09 (m, 1 H, Ar-H), 6.93-6.86 (m, 2 H, Ar-H), 3.89-3.85 (m, 4 H, CH and CH<sub>3</sub>),

3.64-3.56 (m, 1 H, CH), 3.34 (dd,  $J_1 = 13.6$  Hz,  $J_2 = 9.6$  Hz, 1 H, CH<sub>2</sub>), 3.20 (dd,  $J_1 = 14.0$  Hz,  $J_2 = 5.6$  Hz, 1 H, CH<sub>2</sub>). <sup>13</sup>C NMR (101 MHz, CDCl<sub>3</sub>) δ 157.4, 137.1, 131.0, 129.0, 129.8, 128.0, 125.0, 120.9, 112.4, 111.7, 110.7, 55.2, 46.3, 33.7, 28.5. IR ν (neat, cm<sup>-1</sup>) 3064, 2254. The <sup>1</sup>H NMR spectra are matching with the known literature.<sup>17</sup>

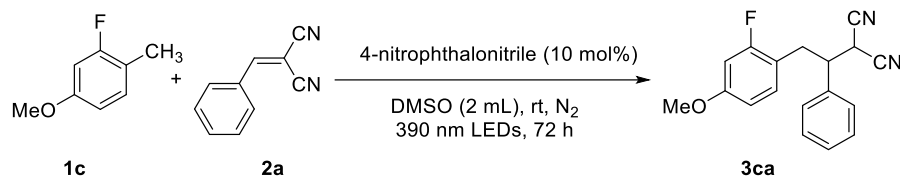

Following Typical Procedure 2, the reaction of **1c** (56.1 mg, 0.4 mmol), **2a** (30.9 mg, 0.2 mmol), and 4-nitrophthalonitrile (3.5 mg, 0.02 mmol) in DMSO (2.0 mL) for 72 h afforded **3ca** (26.4 mg, 45%) (eluent: petroleum ether/ethyl acetate = 100/1 to 20/1): colorless oil. <sup>1</sup>H NMR (400 MHz, CDCl<sub>3</sub>) δ 7.45-7.34 (m, 5 H, Ar-H), 7.07-6.97 (m, 1 H, Ar-H), 6.59-6.66 (m, 2 H, Ar-H), 3.90 (d,  $J = 5.2$  Hz, 1 H, CH), 3.78 (s, 3 H, CH<sub>3</sub>), 3.56-3.49 (m, 1 H, CH), 3.32-3.17 (m, 2 H, CH<sub>2</sub>). <sup>13</sup>C NMR (101 MHz, CDCl<sub>3</sub>) δ 161.7 (d,  $^1J = 240.4$  Hz), 160.4 (d,  $^3J = 4.0$  Hz), 136.3, 131.5 (d,  $^3J = 6.1$  Hz), 129.1, 129.0, 127.9, 115.3 (d,  $^2J = 16.2$  Hz), 111.92, 111.40, 110.2 (d,  $^4J = 2.0$  Hz), 102.1 (d,  $^2J = 25.3$  Hz), 55.6, 46.7, 31.9, 28.7. <sup>19</sup>F NMR (376 MHz, CDCl<sub>3</sub>) δ -115.4. IR ν (neat, cm<sup>-1</sup>) 3032, 2255. HRMS (ESI) m/z: [M + H]<sup>+</sup> Calcd for C<sub>18</sub>H<sub>16</sub>FN<sub>2</sub>O 295.1241; found 295.1233.

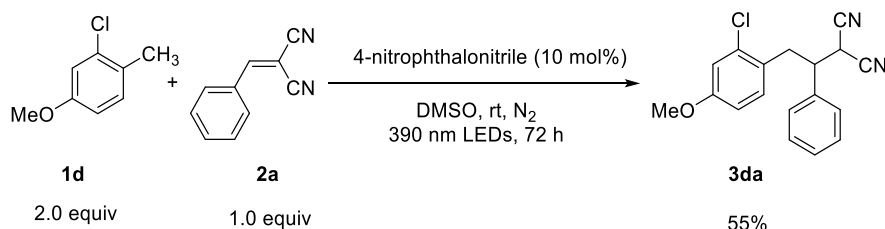

Following Typical Procedure 2, the reaction of **1d** (62.6 mg, 0.4 mmol), **2a** (30.9 mg, 0.2 mmol), and 4-nitrophthalonitrile (3.6 mg, 0.02 mmol) in DMSO (2.0 mL) afforded **3da** (34.2 mg, 55%) (eluent: petroleum ether/ethyl acetate = 100/1 to 20/1): colorless oil. <sup>1</sup>H NMR (400 MHz, CDCl<sub>3</sub>) δ 7.45-7.35 (m, 5 H, Ar-H), 7.03 (d,  $J = 8.8$  Hz, 1 H, Ar-H), 6.96 (d,  $J = 2.4$  Hz, 1 H, Ar-H), 6.71 (dd,  $J_1 = 8.4$  Hz,  $J_2 = 2.4$  Hz, 1 H, Ar-H), 3.90 (d,  $J = 5.2$  Hz, 1 H, CH), 3.78 (s, 3 H, CH<sub>3</sub>), 3.56-3.49 (m, 1 H, CH), 3.37 (dd,  $J_1 = 14.0$  Hz,  $J_2 = 8.6$  Hz, 1 H, CH<sub>2</sub>), 3.27 (dd,  $J_1 = 14.4$  Hz,  $J_2 = 7.0$  Hz, 1 H, CH<sub>2</sub>). <sup>13</sup>C NMR (101 MHz, CDCl<sub>3</sub>) δ 159.6, 136.4, 134.7, 131.8, 129.2, 129.0, 127.9, 126.1, 115.5, 113.2, 111.9, 111.5, 55.5, 46.0, 36.0, 28.6. IR ν (neat, cm<sup>-1</sup>) 3030, 2255. HRMS (ESI) m/z: [M + H]<sup>+</sup> Calcd for C<sub>18</sub>H<sub>16</sub>ClN<sub>2</sub>O 311.0946; found 311.0961.

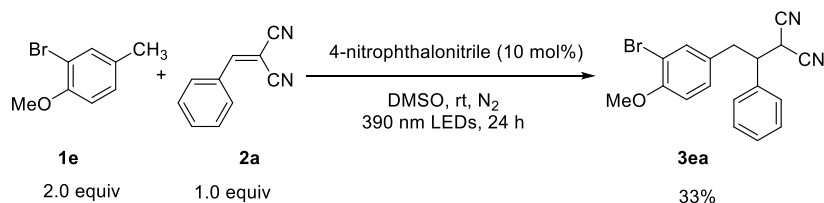

Following Typical Procedure 2, the reaction of **1e** (81.0 mg, 0.4 mmol), **2a** (31.0 mg,

0.2 mmol), and 4-nitrophthalonitrile (3.7 mg, 0.02 mmol) in DMSO (2.0 mL) afforded **3ea** (23.3 mg, 33%) (eluent: petroleum ether/ethyl acetate = 100/1 to 20/1): colorless oil. <sup>1</sup>H NMR (400 MHz, CDCl<sub>3</sub>) δ 7.46-7.32 (m, 6 H, Ar-H), 7.06 (dd, *J*<sub>1</sub> = 8.4 Hz, *J*<sub>2</sub> = 2.0 Hz, 1 H, Ar-H), 6.82 (d, *J* = 8.4 Hz, 1 H, Ar-H), 3.91-3.84 (m, 4 H, CH and CH<sub>3</sub>), 3.46-3.38 (m, 1 H, CH), 3.26-3.12 (m, 2 H, CH<sub>2</sub>). <sup>13</sup>C NMR (101 MHz, CDCl<sub>3</sub>) δ 155.3, 136.0, 133.5, 130.0, 129.2, 129.1, 129.0, 127.9, 112.1, 111.9, 111.4, 56.2, 48.3, 37.3, 28.6. IR ν (neat, cm<sup>-1</sup>) 3030, 2252. HRMS (ESI) *m/z*: [M + Na]<sup>+</sup> Calcd for C<sub>18</sub>H<sub>15</sub>BrN<sub>2</sub>ONa 377.0260; found 377.0273.

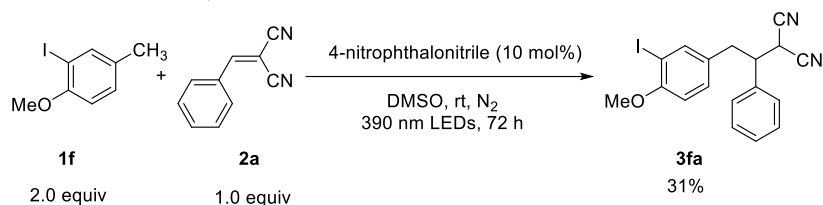

Following Typical Procedure 2, the reaction of **1f** (99.1 mg, 0.4 mmol), **2a** (30.9 mg, 0.2 mmol), and 4-nitrophthalonitrile (3.6 mg, 0.02 mmol) in DMSO (2.0 mL) for 72 h afforded **3fa** (25.1 mg, 31%) (eluent: petroleum ether/ethyl acetate = 100/1 to 10/1): colorless oil. <sup>1</sup>H NMR (400 MHz, CDCl<sub>3</sub>) δ 7.58 (d, *J* = 2.0 Hz, 1 H, Ar-H), 7.47-7.33 (m, 5 H, Ar-H), 7.10 (dd, *J*<sub>1</sub> = 8.4 Hz, *J*<sub>2</sub> = 2.0 Hz, 1 H, Ar-H), 6.74 (d, *J* = 8.4 Hz, 1 H, Ar-H), 3.91-3.84 (m, 4 H, CH and CH<sub>3</sub>), 3.46-3.38 (m, 1 H, CH), 3.26-3.12 (m, 2 H, CH<sub>2</sub>). <sup>13</sup>C NMR (101 MHz, CDCl<sub>3</sub>) δ 157.5, 139.6, 136.1, 130.6, 130.1, 129.2, 129.1, 128.0, 111.9, 111.4, 86.6, 56.38, 48.3, 37.1, 28.5. IR ν (neat, cm<sup>-1</sup>) 3030, 2254. HRMS (ESI) *m/z*: [M + H]<sup>+</sup> Calcd for C<sub>18</sub>H<sub>16</sub>IN<sub>2</sub>O 403.0302; found 403.0317.

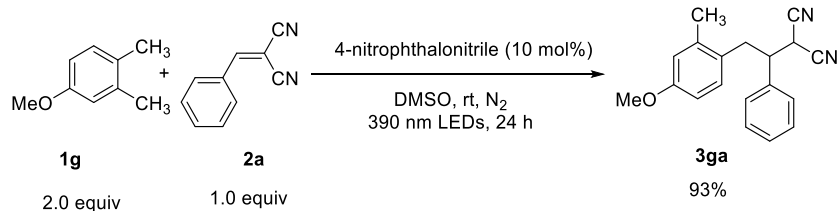

Following Typical Procedure 2, the reaction of **1g** (54.5 mg, 0.4 mmol), **2a** (30.9 mg, 0.2 mmol), and 4-nitrophthalonitrile (3.6 mg, 0.02 mmol) in DMSO (2.0 mL) afforded **3ga** (54.4 mg, 93%) (eluent: petroleum ether/ethyl acetate = 20/1): colorless oil. <sup>1</sup>H NMR (400 MHz, CDCl<sub>3</sub>) δ 7.51-7.34 (m, 5 H, Ar-H), 7.00 (d, *J* = 8.4 Hz, 1 H, Ar-H), 6.80-6.66 (m, 1 H, Ar-H), 3.92 (d, *J* = 5.2 Hz, 1 H, CH), 3.78 (s, 3 H, CH<sub>3</sub>), 3.45-3.13 (m, 3 H, CH and CH<sub>2</sub>), 2.30 (s, 3 H, CH<sub>3</sub>). <sup>13</sup>C NMR (101 MHz, CDCl<sub>3</sub>) δ 158.8, 137.7, 136.7, 130.6, 129.1, 129.0, 127.9, 126.8, 116.7, 112.2, 111.7, 111.5, 55.2, 47.1, 35.3, 28.4, 19.5. IR ν (neat, cm<sup>-1</sup>) 3030, 2257. HRMS (ESI) *m/z*: [M + K]<sup>+</sup> Calcd for C<sub>19</sub>H<sub>18</sub>N<sub>2</sub>O<sub>5</sub>K 329.1051; found 329.1067.

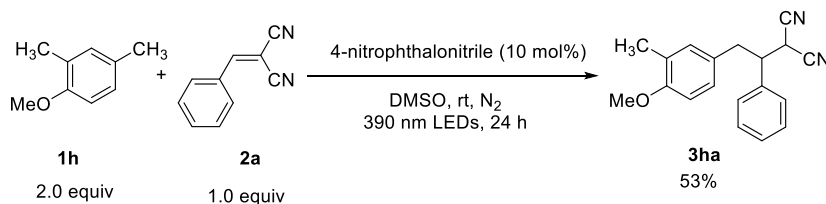

Following Typical Procedure 2, the reaction of **1h** (54.0 mg, 0.4 mmol), **2a** (30.9 mg, 0.2 mmol), and 4-nitrophthalonitrile (3.3 mg, 0.02 mmol) in DMSO (2.0 mL) afforded

**3ha** (30.9 mg, 53%) (eluent: petroleum ether/ethyl acetate = 100/1 to 10/1): colorless oil.  $^1\text{H}$  NMR (400 MHz,  $\text{CDCl}_3$ )  $\delta$  7.65-7.37 (m, 5 H, Ar-H), 7.12-6.95 (m, 2 H, Ar-H), 6.93-6.75 (m, 1 H, Ar-H), 4.05-3.78 (m, 4 H, CH and  $\text{CH}_3$ ), 3.49-3.37 (m, 1 H, CH), 3.26-3.12 (m, 2 H,  $\text{CH}_2$ ), 2.20 (s, 3 H,  $\text{CH}_3$ ).  $^{13}\text{C}$  NMR (101 MHz,  $\text{CDCl}_3$ )  $\delta$  157.2, 136.6, 131.0, 129.1, 129.0, 128.0, 127.5, 127.2, 112.3, 111.5, 110.3, 55.3, 48.5, 37.6, 28.2, 16.2. IR  $\nu$  (neat,  $\text{cm}^{-1}$ ) 3003, 2254. HRMS (ESI)  $m/z$ :  $[\text{M} + \text{H}]^+$  Calcd for  $\text{C}_{19}\text{H}_{19}\text{N}_2\text{O}$  291.1492; found 291.1505.

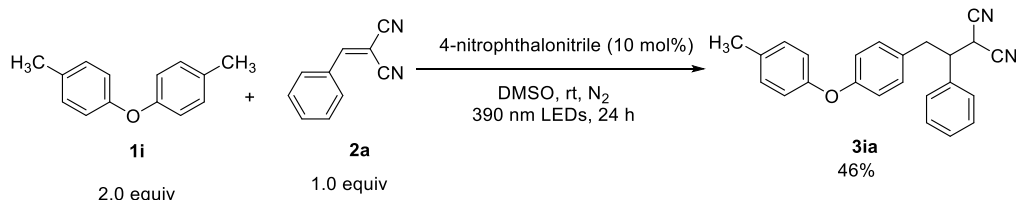

Following Typical Procedure 2, the reaction of **1i** (79.2 mg, 0.4 mmol), **2a** (30.9 mg, 0.2 mmol), and 4-nitrophthalonitrile (3.6 mg, 0.02 mmol) in DMSO (2.0 mL) afforded **3ia** (32.2 mg, 46%) (eluent: petroleum ether/ethyl acetate = 100/1 to 20/1): colorless oil.  $^1\text{H}$  NMR (400 MHz,  $\text{CDCl}_3$ )  $\delta$  7.47-7.37 (m, 5 H, Ar-H), 7.17-7.08 (m, 4 H, Ar-H), 6.95-6.88 (m, 4 H, Ar-H), 3.88 (d,  $J = 5.2$  Hz, 1 H, CH), 3.47-3.34 (m, 1 H, CH), 3.29-3.18 (m, 2 H,  $\text{CH}_2$ ), 2.34 (s, 3 H,  $\text{CH}_3$ ).  $^{13}\text{C}$  NMR (151 MHz,  $\text{CDCl}_3$ )  $\delta$  157.4, 154.2, 136.4, 133.4, 130.6, 130.3, 130.1, 129.2, 129.1, 128.0, 119.3, 118.6, 112.0, 111.4, 48.4, 37.7, 28.5, 20.7. IR  $\nu$  (neat,  $\text{cm}^{-1}$ ) 3030, 2255. HRMS (ESI)  $m/z$ :  $[\text{M} + \text{Na}]^+$  Calcd for  $\text{C}_{24}\text{H}_{20}\text{N}_2\text{ONa}$  375.1468; found 375.1478.

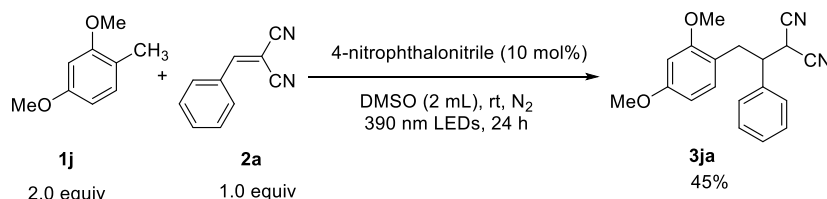

Following Typical Procedure 2, the reaction of **1j** (60.7 mg, 0.4 mmol), **2a** (31.0 mg, 0.2 mmol), and 4-nitrophthalonitrile (3.6 mg, 0.02 mmol) in DMSO (2.0 mL) afforded **3ja** (27.5 mg, 45%) (eluent: petroleum ether/ethyl acetate = 100/1 to 20/1): colorless oil.  $^1\text{H}$  NMR (400 MHz,  $\text{CDCl}_3$ )  $\delta$  7.47-7.37 (m, 5 H, Ar-H), 7.01 (d,  $J = 8.4$  Hz, 1 H, Ar-H), 6.48 (d,  $J = 2.4$  Hz, 1 H, Ar-H), 6.42 (dd,  $J_1 = 8.4$  Hz,  $J_2 = 2.4$  Hz, 1 H, Ar-H), 3.88 (d,  $J = 4.8$  Hz, 1 H, CH), 3.84 (s, 3 H,  $\text{CH}_3$ ), 3.80 (s, 3 H,  $\text{CH}_3$ ), 3.59-3.51 (m, 1 H, CH), 3.24 (dd,  $J_1 = 14.0$  Hz,  $J_2 = 9.6$  Hz, 1 H,  $\text{CH}_2$ ), 3.13 (dd,  $J_1 = 14.0$  Hz,  $J_2 = 5.6$  Hz, 1 H,  $\text{CH}_2$ ).  $^{13}\text{C}$  NMR (101 MHz,  $\text{CDCl}_3$ )  $\delta$  160.5, 158.4, 137.2, 131.3, 129.0, 128.7, 128.0, 117.3, 112.5, 111.7, 104.3, 98.8, 55.3, 46.4, 33.2, 28.4. IR  $\nu$  (neat,  $\text{cm}^{-1}$ ) 3005, 2252. HRMS (ESI)  $m/z$ :  $[\text{M} + \text{H}]^+$  Calcd for  $\text{C}_{19}\text{H}_{19}\text{N}_2\text{O}_5$  307.1441; found 307.1452.

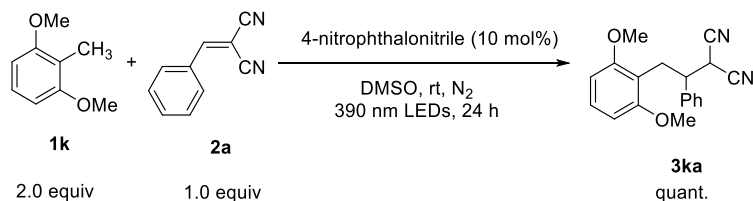

Following Typical Procedure 2, the reaction of **1k** (60.7 mg, 0.4 mmol), **2a** (30.8 mg, 0.2 mmol), and 4-nitrophthalonitrile (3.3 mg, 0.02 mmol) in DMSO (2.0 mL) afforded **3ka** (61.8 mg, quant.) (eluent: petroleum ether/ethyl acetate = 100/1 to 20/1): oil.  $^1\text{H}$

NMR (400 MHz, CDCl<sub>3</sub>)  $\delta$  7.50-7.35 (m, 5 H, Ar-H), 7.28-7.21 (m, 1 H, Ar-H), 6.58 (d,  $J$  = 8.4 Hz, 2 H, Ar-H), 3.89 (d,  $J$  = 3.6 Hz, 1 H, CH), 3.83 (s, 3 H, CH<sub>3</sub>), 3.54-3.43 (m, 2 H, CH<sub>2</sub>), 3.19-3.09 (m, 1 H, CH). <sup>13</sup>C NMR (101 MHz, CDCl<sub>3</sub>)  $\delta$  158.3, 137.7, 128.7, 128.5, 128.1, 113.3, 113.0, 112.0, 103.5, 55.4, 46.2, 28.5, 26.0. IR  $\nu$  (neat, cm<sup>-1</sup>) 3031, 2254. HRMS (ESI)  $m/z$ : [M + H]<sup>+</sup> Calcd for C<sub>19</sub>H<sub>19</sub>N<sub>2</sub>O<sub>5</sub> 307.1441; found 307.1446.

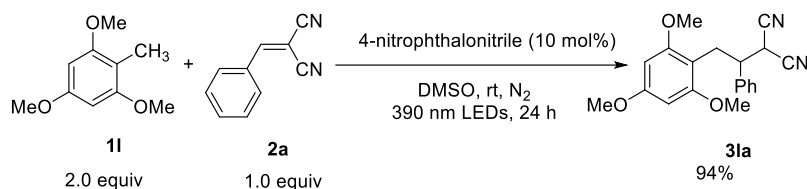

Following Typical Procedure 2, the reaction of **1l** (72.6 mg, 0.4 mmol), **2a** (30.9 mg, 0.2 mmol), and 4-nitrophthalonitrile (3.7 mg, 0.02 mmol) in DMSO (2.0 mL) afforded **3la** (63.2 mg, 94%) (eluent: petroleum ether/ethyl acetate = 20/1): oil. <sup>1</sup>H NMR (400 MHz, CDCl<sub>3</sub>)  $\delta$  7.53-7.35 (m, 5 H, Ar-H), 6.15 (s, 2 H, Ar-H), 3.95-3.71 (m, 10 H, CH and 3  $\times$ CH<sub>3</sub>), 3.45-3.33 (m, 2 H, CH<sub>2</sub>), 3.11-3.00 (m, 1 H, CH). <sup>13</sup>C NMR (101 MHz, CDCl<sub>3</sub>)  $\delta$  160.6, 159.0, 137.8, 128.7, 128.5, 128.1, 113.1, 112.0, 105.7, 90.3, 55.3, 46.6, 28.4, 25.7. IR  $\nu$  (neat, cm<sup>-1</sup>) 3002, 2254. HRMS (ESI)  $m/z$ : [M + H]<sup>+</sup> Calcd for C<sub>20</sub>H<sub>21</sub>N<sub>2</sub>O<sub>3</sub> 337.1547; found 337.1554.

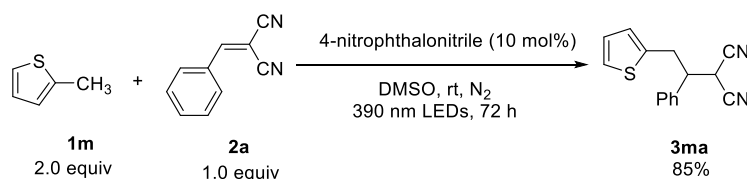

Following Typical Procedure 2, the reaction of **1m** (39.3 mg, 0.4 mmol), **2a** (30.9 mg, 0.2 mmol), and 4-nitrophthalonitrile (3.6 mg, 0.02 mmol) in DMSO (2.0 mL) for 72 h afforded **3ma** (42.8 mg, 85%) (eluent: petroleum ether/ethyl acetate = 100/1 to 20/1): colorless oil. <sup>1</sup>H NMR (400 MHz, CDCl<sub>3</sub>)  $\delta$  7.48-7.38 (m, 5 H, Ar-H), 7.22 (d,  $J$  = 5.2 Hz, 1 H, Ar-H), 6.98-6.94 (m, 1 H, Ar-H), 6.93-6.89 (m, 1 H, Ar-H), 3.98 (d,  $J$  = 4.8 Hz, 1 H, CH), 3.63-3.41 (m, 3 H, CH and CH<sub>2</sub>). <sup>13</sup>C NMR (101 MHz, CDCl<sub>3</sub>)  $\delta$  138.5, 135.8, 129.2, 128.0, 127.3, 127.0, 125.3, 111.8, 111.2, 48.4, 32.6, 28.5. IR  $\nu$  (neat, cm<sup>-1</sup>) 3033, 2254. HRMS (ESI)  $m/z$ : [M + H]<sup>+</sup> Calcd for C<sub>15</sub>H<sub>13</sub>N<sub>2</sub>S 253.0794; found 253.0791.

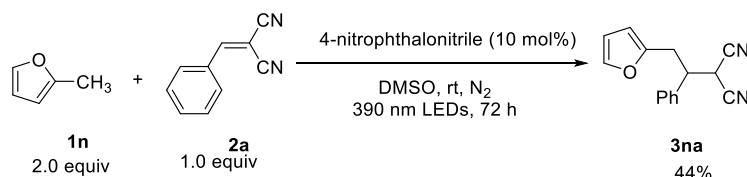

Following Typical Procedure 2, the reaction of **1n** (32.9 mg, 0.4 mmol), **2a** (31.0 mg, 0.2 mmol), and 4-nitrophthalonitrile (3.6 mg, 0.02 mmol) in DMSO (2.0 mL) for 72 h afforded **3na** (21.0 mg, 44%) (eluent: petroleum ether/ethyl acetate = 50/1 to 20/1): colorless oil. <sup>1</sup>H NMR (400 MHz, CDCl<sub>3</sub>)  $\delta$  7.48-7.32 (m, 5 H, Ar-H), 6.34-6.30 (m, 1 H, Ar-H), 6.17 (d,  $J$  = 3.2 Hz, 1 H, Ar-H), 3.98 (d,  $J$  = 4.8 Hz, 1 H, CH), 3.68-3.60 (m, 1 H, CH), 3.36 (dd,  $J_1$  = 15.4 Hz,  $J_2$  = 9.4 Hz, 1 H, CH<sub>2</sub>), 3.26 (dd,  $J_1$  = 15.4 Hz,  $J_2$  =



5.8 Hz, 1 H, CH<sub>2</sub>). <sup>13</sup>C NMR (101 MHz, CDCl<sub>3</sub>) δ 150.1, 142.5, 136.1, 129.2, 127.8, 111.8, 111.2, 110.6, 108.7, 45.3, 31.0, 28.6. IR ν (neat, cm<sup>-1</sup>) 2257. HRMS (ESI) m/z: [M]<sup>+</sup> Calcd for C<sub>15</sub>H<sub>12</sub>N<sub>2</sub>O 236.0944; found 236.0936.

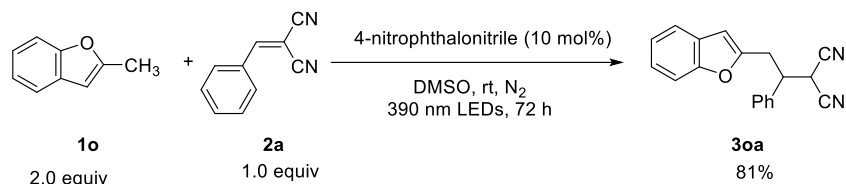

Following Typical Procedure 2, the reaction of **1o** (52.8 mg, 0.4 mmol), **2a** (30.7 mg, 0.2 mmol), and 4-nitrophthalonitrile (3.3 mg, 0.02 mmol) in DMSO (2.0 mL) for 72 h afforded **3oa** (46.1 mg, 81%) (eluent: petroleum ether/ethyl acetate = 100/1 to 10/1): colorless oil. <sup>1</sup>H NMR (400 MHz, CDCl<sub>3</sub>) δ 7.56-7.35 (m, 7 H, Ar-H), 7.33-7.19 (m, 2 H, Ar-H), 6.56 (s, 1 H, Ar-H), 4.04 (d, *J* = 5.2 Hz, 1 H, CH), 3.86-3.76 (m, 1 H, CH), 3.51 (dd, *J*<sub>1</sub> = 13.4 Hz, *J*<sub>2</sub> = 9.2 Hz, 1 H, CH<sub>2</sub>), 3.42 (dd, *J*<sub>1</sub> = 15.2 Hz, *J*<sub>2</sub> = 6.4 Hz, 1 H, CH<sub>2</sub>). <sup>13</sup>C NMR (101 MHz, CDCl<sub>3</sub>) δ 154.9, 152.8, 135.7, 129.3, 128.0, 127.8, 124.4, 123.1, 120.9, 111.6, 111.1, 105.7, 44.7, 31.4, 28.8. IR ν (neat, cm<sup>-1</sup>) 3034, 2255. HRMS (ESI) m/z: [M + H]<sup>+</sup> Calcd for C<sub>19</sub>H<sub>15</sub>N<sub>2</sub>O 287.1179; found 287.1165.

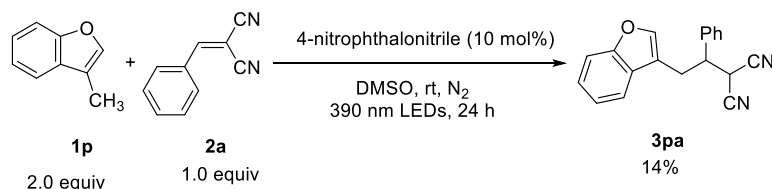

Following Typical Procedure 2, the reaction of **1p** (52.8 mg, 0.4 mmol), **2a** (30.6 mg, 0.2 mmol), and 4-nitrophthalonitrile (3.3 mg, 0.02 mmol) in DMSO (2.0 mL) for 72 h afforded **3pa** (7.9 mg, 14%) (eluent: petroleum ether/ethyl acetate = 100/1 to 20/1): colorless oil. <sup>1</sup>H NMR (400 MHz, CDCl<sub>3</sub>) δ 7.53-7.28 (m, 10 H, Ar-H), 3.98 (d, *J* = 5.2 Hz, 1 H, CH), 3.68-3.59 (m, 1 H, CH × 2), 3.49-3.529 (m, 2 H, CH<sub>2</sub>). <sup>13</sup>C NMR (101 MHz, CDCl<sub>3</sub>) δ <sup>13</sup>C NMR (151 MHz, CDCl<sub>3</sub>) δ 155.4, 142.9, 136.2, 129.4, 129.3, 127.8, 126.9, 125.0, 123.0, 119.0, 115.3, 111.9, 111.8, 111.4, 46.0, 29.0, 26.9. IR ν (neat, cm<sup>-1</sup>) 3033, 2254. HRMS (ESI) m/z: [M + H]<sup>+</sup> Calcd for C<sub>19</sub>H<sub>15</sub>N<sub>2</sub>O 287.1179; found 287.1168.

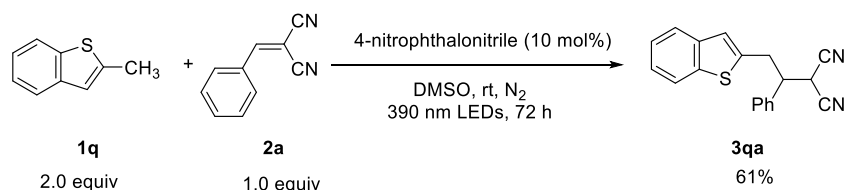

Following Typical Procedure 2, the reaction of **1q** (59.6 mg, 0.4 mmol), **2a** (30.6 mg, 0.2 mmol), and 4-nitrophthalonitrile (3.6 mg, 0.02 mmol) in DMSO (2.0 mL) for 72 h afforded **3qa** (36.4 mg, 61%) (eluent: petroleum ether/ethyl acetate = 100/1 to 20/1): colorless oil. <sup>1</sup>H NMR (400 MHz, CDCl<sub>3</sub>) δ 7.74 (dd, *J*<sub>1</sub> = 27.4 Hz, *J*<sub>2</sub> = 7.4 Hz, 2 H, Ar-H), 7.41-7.27 (m, 7 H, Ar-H), 7.15 (s, 1 H, Ar-H), 4.02 (d, *J* = 4.8 Hz, 1 H, CH), 3.71-3.50 (m, 3 H, CH<sub>2</sub> and CH). <sup>13</sup>C NMR (101 MHz, CDCl<sub>3</sub>) δ 139.6, 139.3, 135.6, 129.4, 128.0, 124.7, 124.6, 123.9, 123.4, 122.3, 111.7, 111.2, 47.7, 33.6, 28.7. IR ν (neat, cm<sup>-1</sup>) 3032, 2255, 2227. HRMS (ESI) m/z: [M + H]<sup>+</sup> Calcd for C<sub>19</sub>H<sub>15</sub>N<sub>2</sub>S

303.0951; found 303.0958.

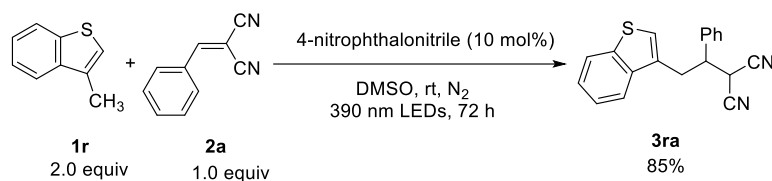

Following Typical Procedure 2, the reaction of **1r** (59.3 mg, 0.4 mmol), **2a** (30.6 mg, 0.2 mmol), and 4-nitrophthalonitrile (3.5 mg, 0.02 mmol) in DMSO (2.0 mL) for 72 h afforded **3ra** (51.2 mg, 85%) (eluent: petroleum ether/ethyl acetate = 100/1 to 10/1): colorless oil. <sup>1</sup>H NMR (400 MHz, CDCl<sub>3</sub>) δ 7.93-7.88 (m, 1 H, Ar-H), 7.78-7.74 (m, 1 H, Ar-H), 7.48-7.38 (m, 7 H, Ar-H), 7.18 (s, 1 H, Ar-H), 3.92 (d, *J* = 4.8 Hz, 1 H, CH), 3.69-3.58 (m, 2 H, CH<sub>2</sub>), 3.54-3.45 (m, 1 H, CH). <sup>13</sup>C NMR (101 MHz, CDCl<sub>3</sub>) δ 140.7, 137.8, 136.4, 130.9, 129.3, 129.2, 127.8, 124.8, 124.7, 124.5, 123.3, 121.1, 111.9, 111.5, 45.9, 31.5, 28.9. IR ν (neat, cm<sup>-1</sup>) 3030, 2253. HRMS (ESI) *m/z*: [M + H]<sup>+</sup> Calcd for C<sub>19</sub>H<sub>15</sub>N<sub>2</sub>S 303.0951; found 303.0952.

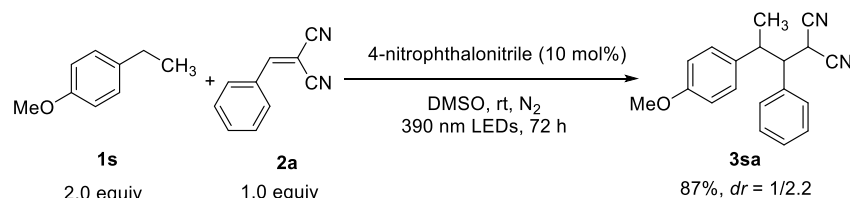

Following Typical Procedure 2, the reaction of **1s** (54.3 mg, 0.4 mmol), **2a** (30.9 mg, 0.2 mmol), and 4-nitrophthalonitrile (3.6 mg, 0.02 mmol) in DMSO (2.0 mL) for 72 h afforded **3sa** (50.9 mg, 87%, *dr* = 1/2.2) (eluent: petroleum ether/ethyl acetate = 100/1 to 20/1): colorless oil. <sup>1</sup>H NMR (400 MHz, CDCl<sub>3</sub>) δ 7.55-7.34 (m, 3.89 H, Ar-H), 7.31-7.26 (m, 2 H, Ar-H), 6.97-6.93 (m, 2 H, Ar-H), 6.87-6.83 (m, 0.6 H, Ar-H), 6.75-6.71 (m, 0.6 H, Ar-H), [4.05 (d, *J* = 8.4 Hz, 0.3 H) and 3.64 (d, *J* = 4.4 Hz, 0.67 H), CH], [3.84 (s, 2.13 H) and 3.75 (s, 0.9 H), OMe], 3.52-3.05 (m, 2 H of CH × 2), [1.39 (d, *J* = 6.8 Hz, 0.92 H) and 1.12 (d, *J* = 6.8 Hz, 2.1 H), CH<sub>3</sub>]. <sup>13</sup>C NMR (101 MHz, CDCl<sub>3</sub>) δ major isomer: 159.2, 135.6, 134.1, 129.2, 128.6, 128.5, 128.1, 114.9, 112.2, 111.5, 55.3, 53.8, 41.2, 28.7, 20.6. Minor isomer: 158.6, 134.7, 132.2, 129.1, 129.0, 128.8, 127.9, 113.7, 112.5, 111.9, 55.1, 52.6, 40.6, 27.4, 20.1. IR ν (neat, cm<sup>-1</sup>) 3033, 2253. The <sup>1</sup>H NMR spectra are matching with the known literature.<sup>7</sup>

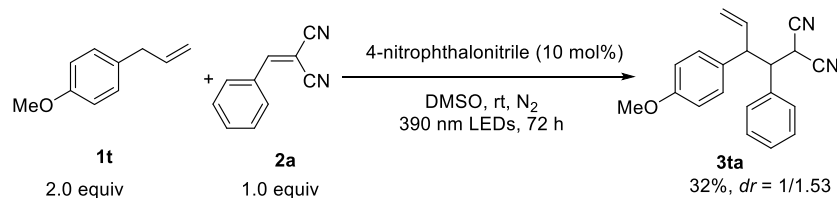

Following Typical Procedure 2, the reaction of **1t** (59.3 mg, 0.4 mmol), **2a** (30.9 mg, 0.2 mmol), and 4-nitrophthalonitrile (3.3 mg, 0.02 mmol) in DMSO (2.0 mL) for 72 h afforded **3ta** (19.5 mg, 32%, *dr* = 1/1.53) (eluent: petroleum ether/ethyl acetate = 20/1 to 10/1): colorless oil. <sup>1</sup>H NMR (400 MHz, CDCl<sub>3</sub>) δ 7.47-7.35 (m, 5 H, Ar-H), 7.34-7.15 (m, 3 H, Ar-H), 6.99-6.80 (m, 2 H, Ar-H and CH), 6.71-6.46 (m, 1 H, CH<sub>2</sub>), 6.01-4.83 (m, 1 H of CH<sub>2</sub>), [4.07 (d, *J* = 5.6 Hz, 0.56 H), 3.95 (d, *J* = 5.6 Hz, 0.36 H), CH]

[3.82 (s, 1.21 H), 3.79 (s, 1.85 H), CH<sub>3</sub>], 3.45-2.81 (m, 2 H of CH). <sup>13</sup>C NMR (101 MHz, CDCl<sub>3</sub>) (a pair of diastereoisomers) δ 159.4, 158.8, 136.5, 136.1, 134.2, 132.5, 129.9, 129.2, 129.1, 129.0, 129.0, 128.9, 128.84, 128.81, 128.7, 128.6, 128.0, 127.9, 127.5, 124.6, 121.6, 118.7, 118.0, 115.0, 114.0, 113.9, 112.0, 111.5, 55.3, 46.7, 46.4, 36.7, 35.8, 30.7, 28.8. IR ν (neat, cm<sup>-1</sup>) 3030, 2255. HRMS (ESI) m/z: [M + H]<sup>+</sup> Calcd for C<sub>20</sub>H<sub>19</sub>N<sub>2</sub>O 303.1492; found 303.1490.

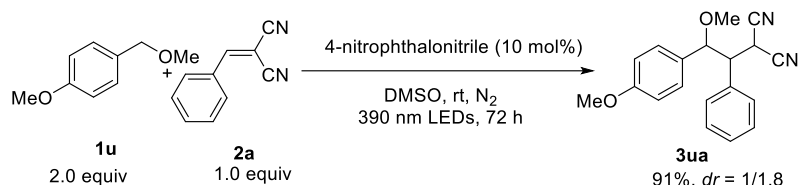

Following Typical Procedure 2, the reaction of **1u** (60.5 mg, 0.4 mmol), **2a** (30.6 mg, 0.2 mmol), and 4-nitrophthalonitrile (3.3 mg, 0.02 mmol) in DMSO (2.0 mL) for 72 h afforded **3ua** (55.4 mg, 91%, *dr* = 1/1.8) (eluent: petroleum ether/ethyl acetate = 100/1 to 10/1): colorless oil. <sup>1</sup>H NMR (400 MHz, CDCl<sub>3</sub>) δ 7.35-7.17 (m, 5 H, Ar-H), 7.05-6.94 (m, 2 H, Ar-H), 6.81-6.70 (m, 2 H, Ar-H), 4.79-4.72 (m, 1 H, CH), [4.55 (d, *J* = 10.4 Hz, 0.63 H), 3.27 (d, *J* = 8.8 Hz, 0.36 H), CH], [3.77 (s, 1.11 H), 3.73 (s, 1.88 H), CH<sub>3</sub>], 3.45-3.34 (m, 1 H of CH), [3.27 (s, 1.97 H), 3.24 (s, 1.21 H), CH<sub>3</sub>]. <sup>13</sup>C NMR (101 MHz, CDCl<sub>3</sub>) (a pair of diastereoisomers) δ 159.6, 159.5, 134.0, 133.5, 129.2, 128.9, 128.9, 128.8, 128.8, 128.7, 128.6, 128.6, 128.2, 113.9, 113.7, 112.3, 112.2, 112.0, 82.8, 81.9, 57.2, 56.6, 55.2 55.1, 53.3, 53.0, 26.80, 26.6. IR ν (neat, cm<sup>-1</sup>) 3033, 2254. HRMS (ESI) m/z: [M + H]<sup>+</sup> Calcd for C<sub>19</sub>H<sub>18</sub>N<sub>2</sub>O<sub>2</sub> 307.1441; found 307.1443.

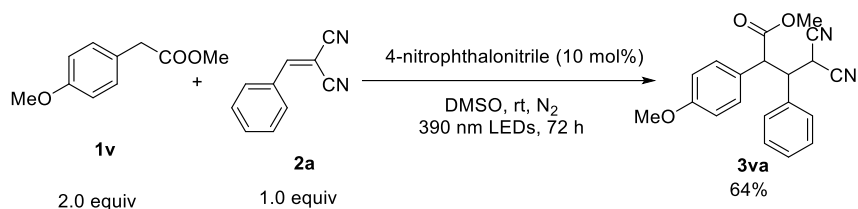

Following Typical Procedure 2, the reaction of **1v** (72.3 mg, 0.4 mmol), **2a** (30.6 mg, 0.2 mmol), and 4-nitrophthalonitrile (3.6 mg, 0.02 mmol) in DMSO (2.0 mL) for 72 h afforded **3va** (42.3 mg, 64%, *dr* = 1/1.0) (eluent: petroleum ether/ethyl acetate = 100/1 to 10/1): oil. <sup>1</sup>H NMR (400 MHz, CDCl<sub>3</sub>) δ 7.57-7.37 (m, 3 H, Ar-H), 7.32-7.16 (m, 3 H, Ar-H), 7.02-6.90 (m, 2 H, Ar-H), 6.72-7.63 (m, 1 H, Ar-H), 4.63 (d, *J* = 4.8 Hz, 0.5 H of CH), 4.33-4.11 (m, 1 H, CH), 3.95-3.40 (m, 7.5 H, CH × 2 and CH<sub>3</sub> × 2). <sup>13</sup>C NMR (151 MHz, CDCl<sub>3</sub>) (a pair of diastereoisomers) δ 174.0, 172.9, 171.0, 160.3, 159.1, 158.7, 134.5, 133.9, 129.4, 129.3, 129.3, 129.2, 128.91, 128.88, 128.6, 128.3, 127.71, 126.67, 125.9, 115.3, 114.2, 113.9, 111.6, 111.5, 110.9, 55.4, 55.1, 53.8, 53.0, 52.7, 52.4, 52.3, 52.1, 49.2, 48.1, 28.0, 27.7. IR ν (neat, cm<sup>-1</sup>) 2255, 1731. HRMS (ESI) m/z: [M]<sup>+</sup> Calcd for C<sub>20</sub>H<sub>19</sub>N<sub>2</sub>O<sub>3</sub> 334.1312; found 334.1320.

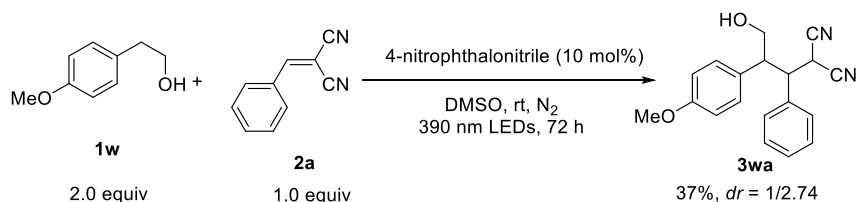

Following Typical Procedure 2, the reaction of **1w** (60.9 mg, 0.4 mmol), **2a** (30.6 mg, 0.2 mmol), and 4-nitrophthalonitrile (3.6 mg, 0.02 mmol) in DMSO (2.0 mL) for 72 h afforded **3wa** (22.2 mg, 37%, *dr* = 1/2.74) (eluent: petroleum ether/ethyl acetate = 2/1): colorless oil. <sup>1</sup>H NMR (400 MHz, CDCl<sub>3</sub>) δ 7.57-6.74 (m, 9 H, Ar-H), 4.51 (brs, 1H, OH), 4.29-4.14 (m, 1.57 H of CH<sub>2</sub>), 3.87-3.72 (m, 4.63 H), 3.63-3.59 (m, 0.53 H), 3.52-3.41 (m, 0.57 H), 2.98-2.89 (m, 0.77 H). <sup>13</sup>C NMR (151 MHz, CDCl<sub>3</sub>) δ 164.0, 159.7, 158.8, 141.6, 134.9, 130.5, 129.8, 129.7, 129.4, 129.1, 128.7, 128.4, 127.9, 127.6, 127.1, 120.7, 115.2, 114.1, 113.5, 112.0, 111.4, 70.4, 64.3, 60.2, 55.4, 55.2, 48.9, 48.8, 46.5, 45.1, 28.6. IR ν (neat, cm<sup>-1</sup>) 3354, 2184. HRMS (ESI) m/z: [M + H]<sup>+</sup> Calcd for C<sub>19</sub>H<sub>19</sub>N<sub>2</sub>O<sub>2</sub> 307.1441; found 307.1431.

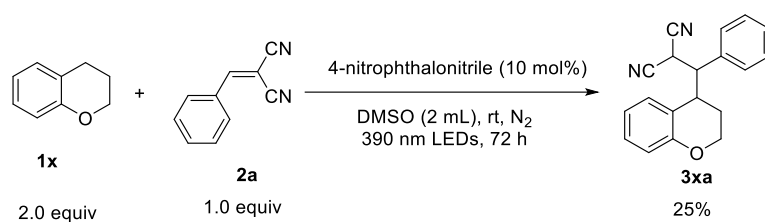

Following Typical Procedure 2, the reaction of **1x** (53.3 mg, 0.4 mmol), **2a** (30.6 mg, 0.2 mmol), and 4-nitrophthalonitrile (3.3 mg, 0.02 mmol) in DMSO (2.0 mL) for 72 h afforded **3xa** (14.0 mg, 25%) (eluent: petroleum ether/ethyl acetate = 100/1 to 10/1): colorless oil. <sup>1</sup>H NMR (400 MHz, CDCl<sub>3</sub>) δ 7.42-7.32 (m, 3 H, Ar-H), 7.14-7.10 (m, 3 H, Ar-H), 6.83-6.77 (m, 1 H, Ar-H), 6.69-6.63 (m, 1 H, Ar-H), 6.56-6.52 (m, 1 H, Ar-H), 4.25-4.13 (m, 2 H, CH and CH<sub>2</sub>), 3.90-3.81 (m, 1 H, CH<sub>2</sub>), 3.63-3.54 (m, 1 H, CH), 3.52-3.46 (m, 1 H, CH), 2.42-2.27 (m, 1 H, CH<sub>2</sub>), 2.21-2.11 (m, 1 H, CH<sub>2</sub>). <sup>13</sup>C NMR (101 MHz, CDCl<sub>3</sub>) δ 154.6, 136.3, 129.5, 129.3, 129.2, 129.0, 128.5, 120.2, 120.0, 117.40, 112.0, 111.9, 62.0, 50.6, 36.2, 27.2, 25.6. IR ν (neat, cm<sup>-1</sup>) 3332, 2253. HRMS (ESI) m/z: [M + H]<sup>+</sup> Calcd for C<sub>19</sub>H<sub>16</sub>N<sub>2</sub>O 289.1335; found 289.1345.

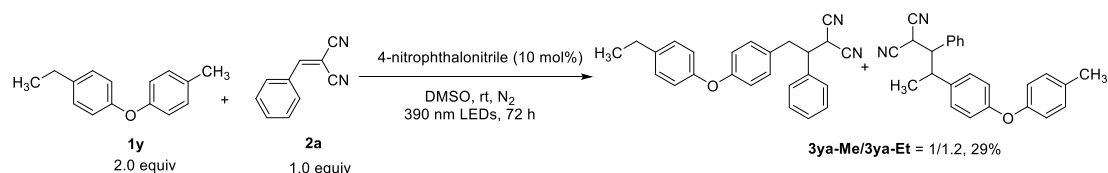

Following Typical Procedure 2, the reaction of **1y** (84.4 mg, 0.4 mmol), **2a** (30.9 mg, 0.2 mmol), and 4-nitrophthalonitrile (3.6 mg, 0.02 mmol) in DMSO (2.0 mL) for 72 h afforded a mixture of **3ya-Me** and **3ya-Et** (21.3 mg, 29%) (eluent: petroleum ether/ethyl acetate = 100/1 to 10/1): colorless oil. <sup>1</sup>H NMR (400 MHz, CDCl<sub>3</sub>) δ **3ya-Me**: 7.54-6.77 (m, 13 H, Ar-H), 3.89 (d, *J* = 5.2 Hz, 1 H, CH), 3.42-3.37 (m, 1 H, CH), 3.34-3.18 (m, 2 H, CH<sub>2</sub>), 2.65 (q, *J* = 7.6 Hz, 2 H, CH<sub>2</sub>), 1.25 (t, *J* = 7.6 Hz, CH<sub>3</sub>). **3ya-Et**: 7.36-6.76 (m, 13 H, Ar-H), 4.08 (d, *J* = 8.0 Hz, 1 H, CH), 3.58-3.44 (m, 2 H, CH × 2), 2.33 (s, 3 H, CH<sub>3</sub>), 1.42 (d, *J* = 6.8 Hz, 3 H, CH<sub>3</sub>). <sup>13</sup>C NMR (101 MHz, CDCl<sub>3</sub>) δ **3ya-Me**: 157.3, 154.3, 136.3, 133.1, 130.7, 130.2, 130.1, 129.2, 129.1, 128.0, 119.3, 118.7, 112.0, 111.4, 48.4, 37.7, 28.5, 20.1, 15.7. **3ya-Et**: 156.9, 139.7, 134.8, 134.7, 129.2, 129.1, 128.7, 128.62, 128.55, 119.9, 118.09, 112.4, 111.9, 52.6, 40.9, 28.1, 27.5, 20.7. IR ν (neat, cm<sup>-1</sup>) 3032, 2254. HRMS (ESI) m/z: [M]<sup>+</sup> Calcd for C<sub>25</sub>H<sub>22</sub>N<sub>2</sub>O 366.1727; found 366.1707.

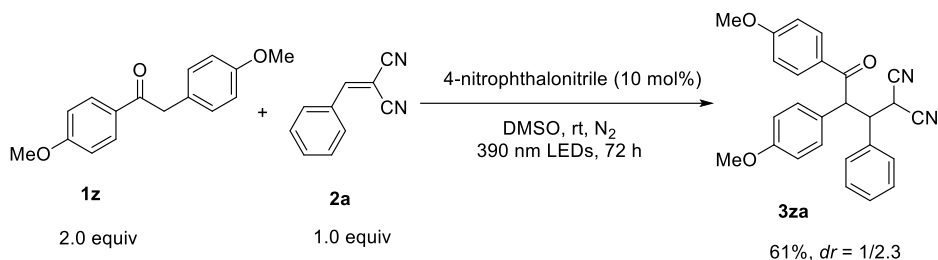

Following Typical Procedure 2, the reaction of **1z** (102.6 mg, 0.4 mmol), **2a** (30.7 mg, 0.2 mmol), and 4-nitrophthalonitrile (3.4 mg, 0.02 mmol) in DMSO (2.0 mL) for 72 h afforded **3za** (61%,  $dr = 1/2.3$ ) (eluent: petroleum ether/ethyl acetate = 20/1) (compound **3z** is unstable and it would decompose back to **1z**, the yield was calculated by adding 1,3,5-trimethoxybenzene as internal standard): yellow oil.  $^1\text{H NMR}$  (400 MHz,  $\text{CDCl}_3$ )  $\delta$  8.01-7.83 (m, 2 H, Ar-H), 7.58-7.43 (m, 3 H, Ar-H), 7.39-7.26 (m, 3.37 H, Ar-H), 7.02-6.85 (m, 2.78 H, Ar-H), 6.84-6.54 (m, 2 H, Ar-H), [5.30 (d,  $J = 11.6$  Hz, 0.65 H) and 5.14 (d,  $J = 10.8$  Hz, 0.26 H), CH], 4.73 (d,  $J = 4.8$  Hz, 0.27 H of CH), 2.23-4.02 (m, 1.22 H,  $\text{CH} \times 2$ ), [3.83-3.77 (m, 5.22 H,) and 3.62 (s, 0.91 H),  $\text{CH}_3$ ], 3.68 (d,  $J = 4.0$  Hz, 0.71 H of CH).  $^{13}\text{C NMR}$  (101 MHz,  $\text{CDCl}_3$ )  $\delta$  major isomer: 193.9, 163.7, 160.0, 135.4, 130.8, 129.1, 128.9, 128.8, 128.2, 126.4, 115.4, 113.9, 111.9, 111.5, 55.4, 55.3, 53.4, 48.8, 28.2. minor isomer: 196.4, 164.1, 158.8, 134.8, 131.3, 129.63, 129.55 129.1, 128.6, 128.3, 127.0, 114.3, 114.0, 113.9, 112.0, 111.6, 55.4, 55.0, 54.4, 48.1, 27.4. IR  $\nu$  (neat,  $\text{cm}^{-1}$ ) 2257, 1669. HRMS (ESI)  $m/z$ :  $[\text{M} + \text{H}]^+$  Calcd for  $\text{C}_{26}\text{H}_{23}\text{N}_2\text{O}_3$  411.1703; found 411.1716.

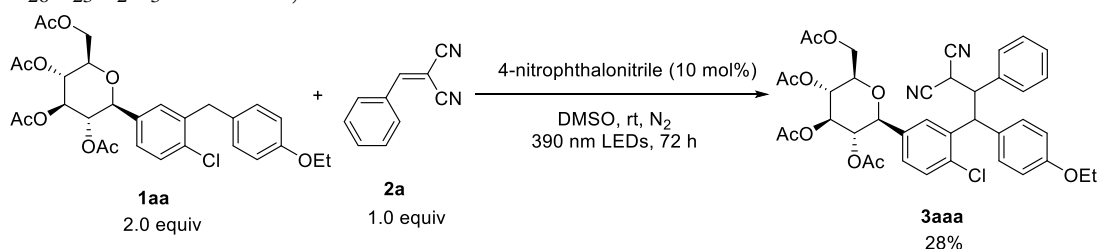

Following Typical Procedure 2, the reaction of **1aa** (230.8 mg, 0.4 mmol), **2a** (30.6 mg, 0.2 mmol), and 4-nitrophthalonitrile (3.4 mg, 0.02 mmol) in DMSO (2.0 mL) for 72 h afforded **3aaa** (40.1 mg, 28%, four diastereomers were observed but hard to determine the accurate ratio) (eluent: petroleum ether/ethyl acetate = 20/1 to 5/1): colorless oil.  $^1\text{H NMR}$  (400 MHz,  $\text{CDCl}_3$ ) see spectrum attached below.  $^{13}\text{C NMR}$  (151 MHz,  $\text{CDCl}_3$ ) see spectrum attached below. IR  $\nu$  (neat,  $\text{cm}^{-1}$ ) 2257, 1754. HRMS (ESI)  $m/z$ :  $[\text{M} + \text{Na}]^+$  Calcd for  $\text{C}_{39}\text{H}_{39}\text{ClN}_2\text{O}_{10}\text{Na}$  753.2185; found 753.2177

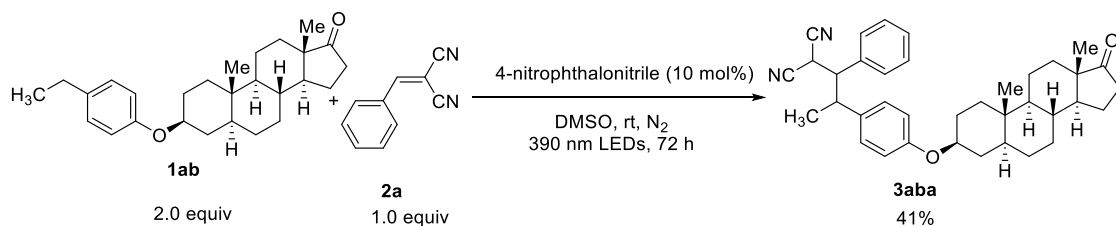

Following Typical Procedure 2, the reaction of **1ab** (158.1 mg, 0.4 mmol), **2a** (30.6 mg, 0.2 mmol), and 4-nitrophthalonitrile (3.6 mg, 0.02 mmol) in DMSO (2.0 mL) for 72 h afforded **3aba** (44.3 mg, 41%, four diastereomers were observed but hard to determine

the accurate ratio) (eluent: petroleum ether/ethyl acetate = 100/1 to 10/1): colorless oil.  $^1\text{H}$  NMR (400 MHz,  $\text{CDCl}_3$ )  $\delta$  see spectrum attached below.  $^{13}\text{C}$  NMR (101 MHz,  $\text{CDCl}_3$ )  $\delta$  see spectrum attached below. IR  $\nu$  (neat,  $\text{cm}^{-1}$ ) 2252, 1738. HRMS (ESI)  $m/z$ :  $[\text{M} + \text{H}]^+$  Calcd for  $\text{C}_{37}\text{H}_{45}\text{N}_2\text{O}_2$  549.3476; found 549.3464.

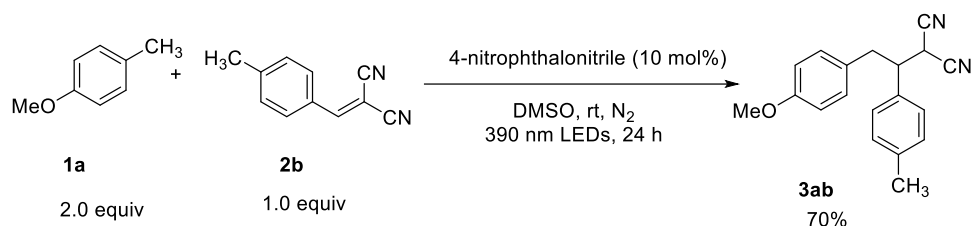

Following Typical Procedure 2, the reaction of **1a** (48.9 mg, 0.4 mmol), **2b** (33.3 mg, 0.2 mmol), and 4-nitrophthalonitrile (3.6 mg, 0.02 mmol) in DMSO (2.0 mL) afforded **3ab** (40.2 mg, 70%) (eluent: petroleum ether/ethyl acetate = 100/1 to 20/1): oil.  $^1\text{H}$  NMR (400 MHz,  $\text{CDCl}_3$ )  $\delta$  7.31-7.20 (m, 4 H, Ar-H), 7.11 (d,  $J = 8.4$  Hz, 2 H, Ar-H), 6.86 (d,  $J = 8.4$  Hz, 2 H, Ar-H), 3.83 (d,  $J = 4.8$  Hz, 1 H, CH), 3.80 (s, 3 H,  $\text{CH}_3$ ), 3.44-3.34 (m, 1 H, CH), 3.22-3.15 (m, 2 H,  $\text{CH}_2$ ), 2.37 (s, 3 H,  $\text{CH}_3$ ).  $^{13}\text{C}$  NMR (101 MHz,  $\text{CDCl}_3$ )  $\delta$  158.8, 138.8, 133.4, 129.9, 129.8, 128.6, 127.8, 114.4, 112.2, 111.5, 55.2, 48.1, 37.6, 28.5, 21.1. IR  $\nu$  (neat,  $\text{cm}^{-1}$ ) 3006, 2254. HRMS (ESI)  $m/z$ :  $[\text{M}]^+$  Calcd for  $\text{C}_{19}\text{H}_{18}\text{N}_2\text{O}$  290.1414; found 290.1419.

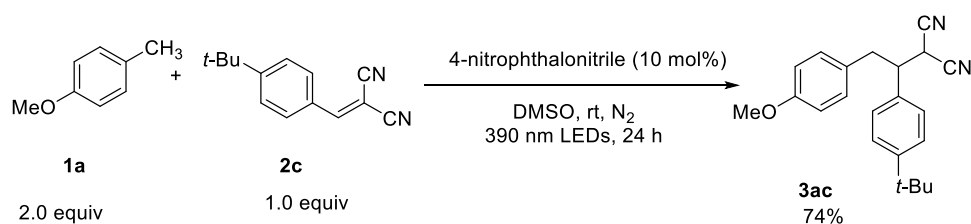

Following Typical Procedure 2, the reaction of **1a** (48.9 mg, 0.4 mmol), **2c** (42.3 mg, 0.2 mmol), and 4-nitrophthalonitrile (3.6 mg, 0.02 mmol) in DMSO (2.0 mL) afforded **3ac** (49.4 mg, 74%) (eluent: petroleum ether/ethyl acetate = 100/1 to 20/1): oil.  $^1\text{H}$  NMR (400 MHz,  $\text{CDCl}_3$ )  $\delta$  7.45 (d,  $J = 8.4$  Hz, 2 H, Ar-H), 7.35 (d,  $J = 8.0$  Hz, 2 H, Ar-H), 7.14 (d,  $J = 8.4$  Hz, 2 H, Ar-H), 6.88 (d,  $J = 8.4$  Hz, 2 H, Ar-H), 3.87-3.83 (m, 1 H, CH), 3.81 (s, 3 H,  $\text{CH}_3$ ), 3.46-3.36 (m, 1 H, CH), 3.20 (d,  $J = 8.0$  Hz, 2 H,  $\text{CH}_2$ ), 1.35 (s, 9 H,  $\text{CH}_3 \times 3$ ).  $^{13}\text{C}$  NMR (101 MHz,  $\text{CDCl}_3$ )  $\delta$  158.9, 151.9, 133.4, 129.9, 128.7, 127.6, 126.0, 114.5, 112.2, 111.5, 55.2, 48.0, 37.5, 34.6, 31.2, 28.3. IR  $\nu$  (neat,  $\text{cm}^{-1}$ ) 3031, 2254. HRMS (ESI)  $m/z$ :  $[\text{M} + \text{K}]^+$  Calcd for  $\text{C}_{22}\text{H}_{24}\text{N}_2\text{O}$  371.1520; found 371.1502.

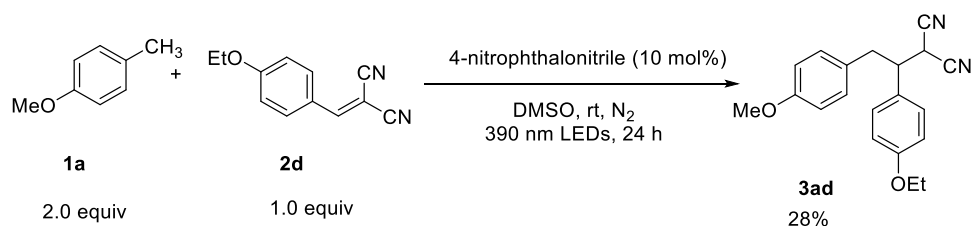

Following Typical Procedure 2, the reaction of **1a** (48.6 mg, 0.4 mmol), **2d** (39.3 mg, 0.2 mmol), and 4-nitrophthalonitrile (3.8 mg, 0.02 mmol) in DMSO (2.0 mL) afforded **3ad** (17.9 mg, 28%) (eluent: petroleum ether/ethyl acetate = 100/1 to 20/1): oil.  $^1\text{H}$

NMR (400 MHz, CDCl<sub>3</sub>) δ 7.31-7.27 (m, 2 H, Ar-H), 7.13-7.07 (m, 2 H, Ar-H), 6.94-6.90 (m, 2 H, Ar-H), 6.88-6.83 (m, 2 H, Ar-H), 4.04 (q, *J* = 7.2 Hz, 2 H, CH<sub>2</sub>), 3.83-3.78 (m, 4 H, CH and CH<sub>3</sub>), 3.40-3.33 (m, 1 H, CH), 3.17 (d, *J* = 8.0 Hz, 2 H, CH<sub>2</sub>), 1.42 (t, *J* = 7.0 Hz, 3 H, CH<sub>3</sub>). <sup>13</sup>C NMR (101 MHz, CDCl<sub>3</sub>) δ 159.3, 158.9, 129.9, 129.1, 128.7, 128.2, 114.9, 114.5, 112.3, 111.5, 63.5, 55.3, 47.9, 37.7, 28.6, 14.8. IR ν (neat, cm<sup>-1</sup>) 2251. HRMS (ESI) *m/z*: [M + K]<sup>+</sup> Calcd for C<sub>20</sub>H<sub>20</sub>N<sub>2</sub>O<sub>2</sub>K 359.1156; found 359.1174.

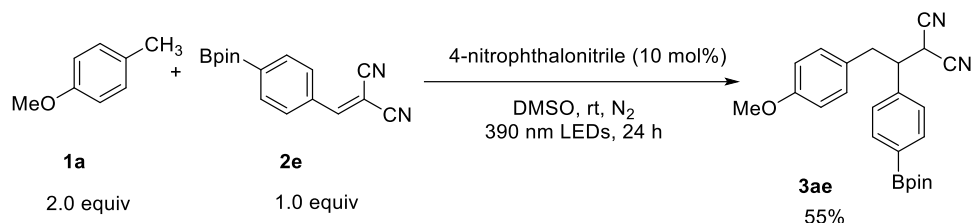

Following Typical Procedure 2, the reaction of **1a** (48.8 mg, 0.4 mmol), **2e** (56.2 mg, 0.2 mmol), and 4-nitrophthalonitrile (3.4 mg, 0.02 mmol) in DMSO (2.0 mL) afforded **3ae** (44.7 mg, 55%) (eluent: petroleum ether/ethyl acetate = 50/1 to 20/1): oil. <sup>1</sup>H NMR (400 MHz, CDCl<sub>3</sub>) δ 7.85 (d, *J* = 8.0 Hz, 2 H, Ar-H), 7.37 (d, *J* = 8.0 Hz, 2 H, Ar-H), 7.08 (d, *J* = 8.4 Hz, 2 H, Ar-H), 6.84 (d, *J* = 8.8 Hz, 2 H, Ar-H), 3.86 (d, *J* = 5.2 Hz, 1 H, CH), 3.79 (s, 3 H, CH<sub>3</sub>), 3.46-3.38 (m, 1 H, CH), 3.26-3.14 (m, 2 H, CH<sub>2</sub>), 1.35 (s, 12 H, CH<sub>3</sub> × 4). <sup>13</sup>C NMR (101 MHz, CDCl<sub>3</sub>) δ 158.8, 139.3, 135.5, 129.9, 128.3, 127.3, 114.4, 112.0, 111.4, 84.0, 55.2, 48.5, 37.5, 28.2, 24.8. IR ν (neat, cm<sup>-1</sup>) 2255, 2231. HRMS (ESI) *m/z*: [M + K]<sup>+</sup> Calcd for C<sub>24</sub>H<sub>27</sub>BN<sub>2</sub>O<sub>3</sub>K 441.1746; found 441.1748.

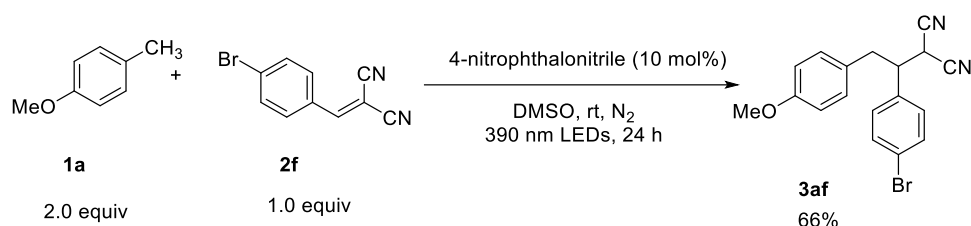

Following Typical Procedure 2, the reaction of **1a** (48.7 mg, 0.4 mmol), **2f** (46.9 mg, 0.2 mmol), and 4-nitrophthalonitrile (3.6 mg, 0.02 mmol) in DMSO (2.0 mL) afforded **3af** (47.4 mg, 66%) (eluent: petroleum ether/ethyl acetate = 100/1 to 20/1): oil. <sup>1</sup>H NMR (400 MHz, CDCl<sub>3</sub>) δ 7.56 (d, *J* = 8.4 Hz, 2 H, Ar-H), 7.27 (d, *J* = 8.4 Hz, 2 H, Ar-H), 7.09 (d, *J* = 8.8 Hz, 2 H, Ar-H), 6.86 (d, *J* = 8.4 Hz, 2 H, Ar-H), 3.84 (d, *J* = 4.8 Hz, 1 H, CH), 3.80 (s, 3 H, CH<sub>3</sub>), 3.43-3.35 (m, 1 H, CH), 3.23-3.12 (m, 2 H, CH<sub>2</sub>). <sup>13</sup>C NMR (101 MHz, CDCl<sub>3</sub>) δ 159.0, 135.3, 132.3, 129.9, 129.7, 127.9, 123.1, 114.5, 111.9, 111.2, 55.2, 47.8, 37.4, 28.1. IR ν (neat, cm<sup>-1</sup>) 2253. HRMS (ESI) *m/z*: [M + Na]<sup>+</sup> Calcd for C<sub>18</sub>H<sub>15</sub>BrN<sub>2</sub>ONa 377.0260; found 377.0260.

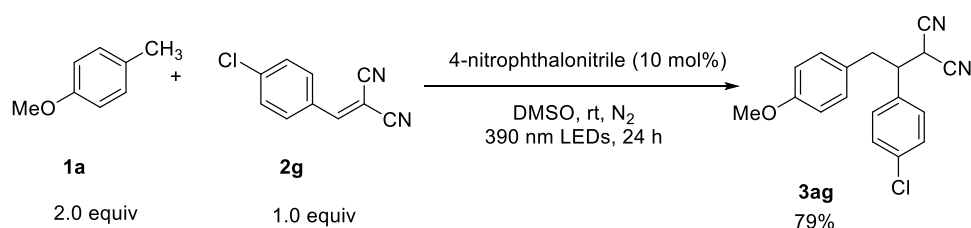

Following Typical Procedure 2, the reaction of **1a** (48.9 mg, 0.4 mmol), **2g** (38.0 mg,

0.2 mmol), and 4-nitrophthalonitrile (3.4 mg, 0.02 mmol) in DMSO (2.0 mL) afforded **3ag** (49.7 mg, 79%) (eluent: petroleum ether/ethyl acetate = 50/1 to 20/1): oil.  $^1\text{H}$  NMR (400 MHz,  $\text{CDCl}_3$ )  $\delta$  7.43-7.38 (m, 2 H, Ar-H), 7.36-7.30 (m, 2 H, Ar-H), 7.12-7.06 (m, 2 H, Ar-H), 6.89-6.83 (m, 2 H, Ar-H), 3.84 (d,  $J = 5.2$  Hz, 1 H, CH), 3.80 (s, 3 H,  $\text{CH}_3$ ), 3.44-3.35 (m, 1 H, CH), 3.22-3.11 (m, 2 H,  $\text{CH}_2$ ).  $^{13}\text{C}$  NMR (101 MHz,  $\text{CDCl}_3$ )  $\delta$  159.1, 135.1, 134.8, 129.9, 129.4, 128.0, 114.6, 111.9, 111.2, 55.3, 47.9, 37.6, 28.2. IR  $\nu$  (neat,  $\text{cm}^{-1}$ ) 2257. HRMS (ESI)  $m/z$ :  $[\text{M} + \text{H}]^+$  Calcd for  $\text{C}_{18}\text{H}_{16}\text{ClN}_2\text{O}$  311.0946; found 311.0928.

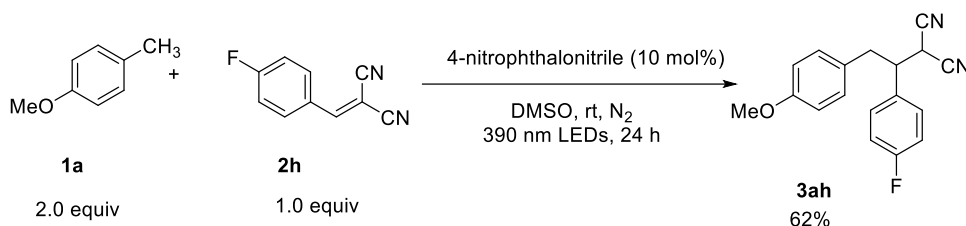

Following Typical Procedure 2, the reaction of **1a** (48.8 mg, 0.4 mmol), **2h** (34.6 mg, 0.2 mmol), and 4-nitrophthalonitrile (3.3 mg, 0.02 mmol) in DMSO (2.0 mL) afforded **3ah** (36.4 mg, 62%) (eluent: petroleum ether/ethyl acetate = 100/1 to 20/1): colorless oil.  $^1\text{H}$  NMR (400 MHz,  $\text{CDCl}_3$ )  $\delta$  7.41-7.34 (m, 2 H, Ar-H), 7.16-7.07 (m, 4 H, Ar-H), 6.89-6.84 (m, 2 H, Ar-H), 3.84 (d,  $J = 5.2$  Hz, 1 H, CH), 3.80 (s, 3 H,  $\text{CH}_3$ ), 3.44-3.37 (m, 1 H, CH), 3.23-3.11 (m, 2 H,  $\text{CH}_2$ ).  $^{13}\text{C}$  NMR (101 MHz,  $\text{CDCl}_3$ )  $\delta$  162.9 (d,  $^1J = 249.5$  Hz), 159.0, 132.2, 129.9, 129.8 (d,  $^3J = 8.1$  Hz), 128.1, 116.1 (d,  $^2J = 21.2$  Hz), 114.5, 112.0, 111.3, 55.2, 47.7, 37.7, 28.4.  $^{19}\text{F}$  NMR (376 MHz,  $\text{CDCl}_3$ )  $\delta$  -112.2. IR  $\nu$  (neat,  $\text{cm}^{-1}$ ) 3006, 2255. HRMS (ESI)  $m/z$ :  $[\text{M}]^+$  Calcd for  $\text{C}_{18}\text{H}_{15}\text{FN}_2\text{O}$  294.1163; found 294.1174.

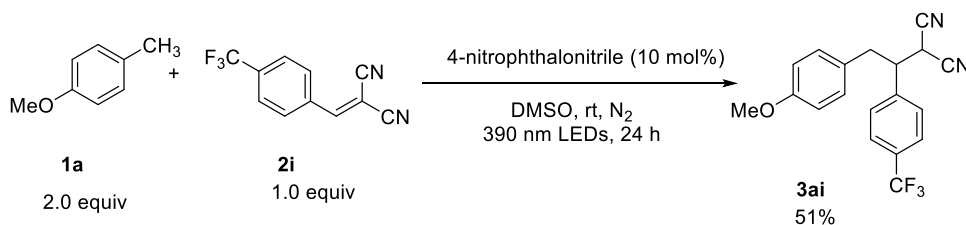

Following Typical Procedure 2, the reaction of **1a** (48.9 mg, 0.4 mmol), **2i** (44.3 mg, 0.2 mmol), and 4-nitrophthalonitrile (3.7 mg, 0.02 mmol) in DMSO (2.0 mL) afforded **3ai** (34.7 mg, 51%) (eluent: petroleum ether/ethyl acetate = 100/1 to 20/1): colorless oil.  $^1\text{H}$  NMR (400 MHz,  $\text{CDCl}_3$ )  $\delta$  7.70 (d,  $J = 8.4$  Hz, 2 H, Ar-H), 7.53 (d,  $J = 8.4$  Hz, 2 H, Ar-H), 7.11 (d,  $J = 8.8$  Hz, 2 H, Ar-H), 6.87 (d,  $J = 8.4$  Hz, 2 H, Ar-H), 3.89 (d,  $J = 5.2$  Hz, 1 H, CH), 3.80 (s, 3 H,  $\text{CH}_3$ ), 3.56-3.44 (m, 1 H, CH), 3.28-3.15 (m, 2 H,  $\text{CH}_2$ ).  $^{13}\text{C}$  NMR (151 MHz,  $\text{CDCl}_3$ )  $\delta$  159.2, 140.3, 131.3 (q,  $^2J = 33.2$  Hz), 129.9, 128.6, 127.7, 126.2 (q,  $^3J = 4.5$  Hz), 123.7 (q,  $^1J = 273.3$  Hz), 114.7, 111.8, 111.1, 55.3, 48.2, 37.5, 28.0.  $^{19}\text{F}$  NMR (376 MHz,  $\text{CDCl}_3$ )  $\delta$  -63.0. IR  $\nu$  (neat,  $\text{cm}^{-1}$ ) 2225. HRMS (ESI)  $m/z$ :  $[\text{M} + \text{H}]^+$  Calcd for  $\text{C}_{19}\text{H}_{16}\text{F}_3\text{N}_2\text{O}$  345.1209; found 345.1212.



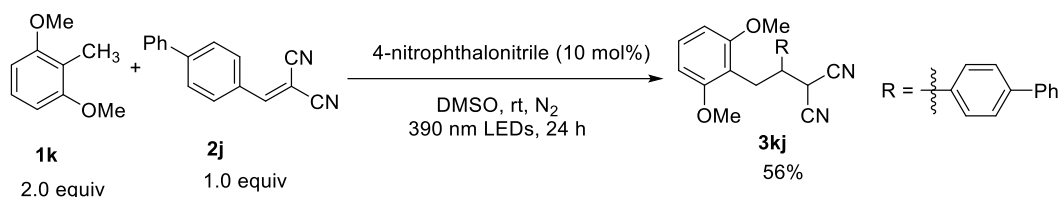

Following Typical Procedure 2, the reaction of **1k** (61.0 mg, 0.4 mmol), **2j** (45.7 mg, 0.2 mmol), and 4-nitrophthalonitrile (3.4 mg, 0.02 mmol) in DMSO (2.0 mL) afforded **3kj** (42.3 mg, 56%) (eluent: petroleum ether/ethyl acetate = 100/1 to 10/1): colorless oil.  $^1\text{H NMR}$  (400 MHz,  $\text{CDCl}_3$ )  $\delta$  7.66-7.59 (m, 4 H, Ar-H), 7.57-7.52 (m, 2 H, Ar-H), 7.49-7.43 (m, 2 H, Ar-H), 7.40-7.34 (m, 1 H, Ar-H), 7.28-7.22 (m, 1 H, Ar-H), 6.59 (d,  $J = 8.4$  Hz, 2 H, Ar-H), 3.91 (d,  $J = 3.6$  Hz, 1 H, CH), 3.84 (s, 6 H,  $\text{CH}_3 \times 2$ ), 3.55-3.46 (m, 2 H,  $\text{CH}_2$ ), 3.20-3.11 (m, 1 H, CH).  $^{13}\text{C NMR}$  (101 MHz,  $\text{CDCl}_3$ )  $\delta$  158.4, 141.5, 140.5, 136.7, 128.8, 128.6, 127.4, 127.1, 113.4, 113.1, 112.0, 103.7, 55.5, 46.1, 28.5, 26.1. IR  $\nu$  (neat,  $\text{cm}^{-1}$ ) 2225. HRMS (ESI)  $m/z$ :  $[\text{M} + \text{Li}]^+$  Calcd for  $\text{C}_{25}\text{H}_{22}\text{N}_2\text{O}_2\text{Li}$  389.1836; found 389.1843.

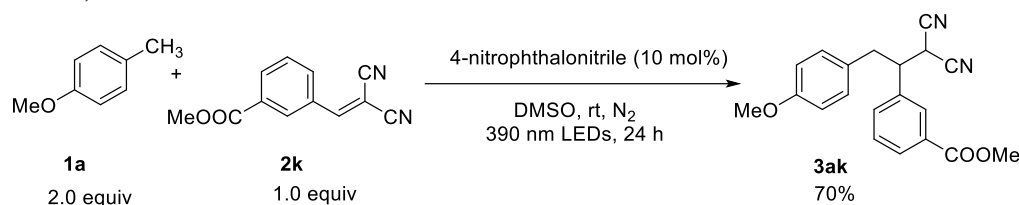

Following Typical Procedure 2, the reaction of **1a** (49.0 mg, 0.4 mmol), **2k** (42.4 mg, 0.2 mmol), and 4-nitrophthalonitrile (3.4 mg, 0.02 mmol) in DMSO (2.0 mL) afforded **3ak** (46.6 mg, 70%) (eluent: petroleum ether/ethyl acetate = 50/1 to 20/1 to 10/1): colorless oil.  $^1\text{H NMR}$  (400 MHz,  $\text{CDCl}_3$ )  $\delta$  8.09-8.03 (m, 2 H, Ar-H), 7.62-7.57 (m, 1 H, Ar-H), 7.54-7.47 (m, 1 H, Ar-H), 7.12-7.05 (m, 2 H, Ar-H), 6.89-6.82 (m, 2 H, Ar-H), 3.94 (s, 3 H,  $\text{CH}_3$ ), 3.89 (d,  $J = 5.6$  Hz, 1 H, CH), 3.79 (s, 3 H,  $\text{CH}_3$ ), 3.53-3.45 (m, 1 H, CH), 3.29-3.15 (m, 2 H,  $\text{CH}_2$ ).  $^{13}\text{C NMR}$  (101 MHz,  $\text{CDCl}_3$ )  $\delta$  166.4, 159.0, 136.8, 132.4, 131.1, 130.2, 129.9, 129.3, 129.2, 128.0, 114.5, 111.9, 111.2, 55.3, 52.4, 48.3, 37.6, 28.2. IR  $\nu$  (neat,  $\text{cm}^{-1}$ ) 2254, 1721. HRMS (ESI)  $m/z$ :  $[\text{M} + \text{Na}]^+$  Calcd for  $\text{C}_{20}\text{H}_{18}\text{N}_2\text{O}_3\text{Na}$  357.1210; found 357.1224.

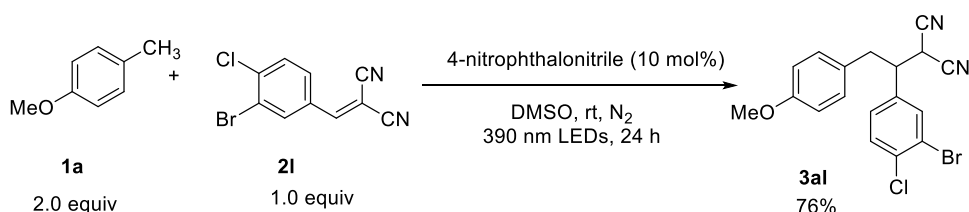

Following Typical Procedure 2, the reaction of **1a** (49.0 mg, 0.4 mmol), **2l** (53.3 mg, 0.2 mmol), and 4-nitrophthalonitrile (3.3 mg, 0.02 mmol) in DMSO (2.0 mL) afforded **3al** (59.0 mg, 76%) (eluent: petroleum ether/ethyl acetate = 100/1 to 20/1): colorless oil.  $^1\text{H NMR}$  (400 MHz,  $\text{CDCl}_3$ )  $\delta$  7.64 (d,  $J = 2.0$  Hz, 1 H, Ar-H), 7.50 (d,  $J = 8.4$  Hz, 1 H, Ar-H), 7.32-7.27 (m, 1 H, Ar-H), 7.09 (d,  $J = 8.8$  Hz, 2 H, Ar-H), 6.87 (d,  $J = 8.8$  Hz, 2 H, Ar-H), 3.85 (d,  $J = 5.2$  Hz, 1 H, CH), 3.80 (s, 3 H,  $\text{CH}_3$ ), 3.41-3.33 (m, 1 H, CH), 3.21-3.11 (m, 2 H,  $\text{CH}_2$ ).  $^{13}\text{C NMR}$  (101 MHz,  $\text{CDCl}_3$ )  $\delta$  159.1, 136.6, 135.4, 133.3, 130.9, 129.9, 128.0, 127.5, 123.3, 114.7, 111.7, 111.0, 55.3, 47.4, 37.5, 28.0. IR

$\nu$  (neat,  $\text{cm}^{-1}$ ) 3003, 2253. HRMS (ESI)  $m/z$ :  $[M + H]^+$  Calcd for  $\text{C}_{18}\text{H}_{16}\text{BrCIN}_2\text{O}$  390.0129; found 390.0120.

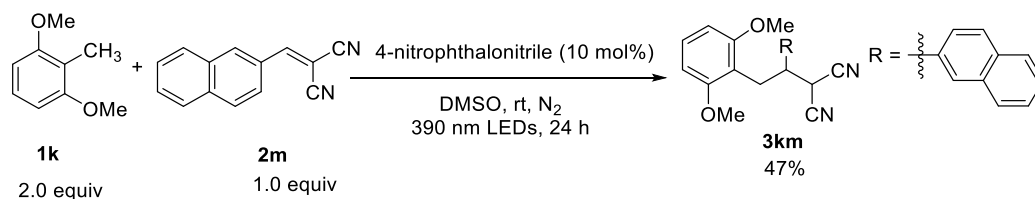

Following Typical Procedure 2, the reaction of **1k** (60.5 mg, 0.4 mmol), **2m** (40.7 mg, 0.2 mmol), and 4-nitrophthalonitrile (3.3 mg, 0.02 mmol) in DMSO (2.0 mL) afforded **3km** (33.7 mg, 47%) (eluent: petroleum ether/ethyl acetate = 100/1 to 20/1): colorless oil.  $^1\text{H}$  NMR (400 MHz,  $\text{CDCl}_3$ )  $\delta$  7.96-7.84 (m, 4 H, Ar-H), 7.64-7.58 (m, 1 H, Ar-H), 7.56-7.49 (m, 2 H, Ar-H), 7.27-7.21 (m, 1 H, Ar-H), 6.58 (d,  $J = 8.4$  Hz, 2 H, Ar-H), 3.98 (d,  $J = 3.2$  Hz, 1 H, CH), 3.83 (s, 6 H,  $\text{CH}_3 \times 2$ ), 3.71-3.52 (m, 2 H,  $\text{CH}_2$ ), 3.29-3.22 (m, 1 H, CH).  $^{13}\text{C}$  NMR (101 MHz,  $\text{CDCl}_3$ )  $\delta$  158.4, 135.2, 133.2, 133.2, 128.8, 128.5, 128.1, 127.6, 127.5, 126.4, 125.7, 113.4, 113.0, 112.1, 103.6, 55.5, 46.4, 28.6, 26.2. IR  $\nu$  (neat,  $\text{cm}^{-1}$ ) 3003, 2253. HRMS (ESI)  $m/z$ :  $[M + H]^+$  Calcd for  $\text{C}_{23}\text{H}_{21}\text{N}_2\text{O}_2$  357.1598; found 357.1583.

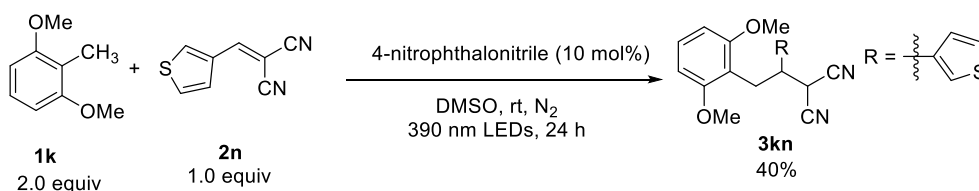

Following Typical Procedure 2, the reaction of **1k** (61.1 mg, 0.4 mmol), **2n** (32.4 mg, 0.2 mmol), and 4-nitrophthalonitrile (3.5 mg, 0.02 mmol) in DMSO (2.0 mL) afforded **3kn** (25.2 mg, 40%) (eluent: petroleum ether/ethyl acetate = 100/1 to 20/1): colorless oil.  $^1\text{H}$  NMR (400 MHz,  $\text{CDCl}_3$ )  $\delta$  7.45-7.35 (m, 2 H, Ar-H), 7.29-7.21 (m, 2 H, Ar-H), 6.58 (d,  $J = 8.4$  Hz, 2 H, Ar-H), 3.89-3.80 (m, 7 H, CH and  $\text{CH}_3 \times 2$ ), 3.69-3.59 (m, 1 H,  $\text{CH}_2$ ), 3.45-3.34 (m, 1 H,  $\text{CH}_2$ ), 3.21-3.11 (m, 1 H, CH).  $^{13}\text{C}$  NMR (101 MHz,  $\text{CDCl}_3$ )  $\delta$  158.4, 138.4, 128.8, 126.9, 126.2, 123.4, 113.2, 112.0, 103.6, 55.5, 42.1, 28.4, 26.4. IR  $\nu$  (neat,  $\text{cm}^{-1}$ ) 3004, 2252. HRMS (ESI)  $m/z$ :  $[M + H]^+$  Calcd for  $\text{C}_{17}\text{H}_{17}\text{N}_2\text{O}_2\text{S}$  313.1005; found 313.1011.

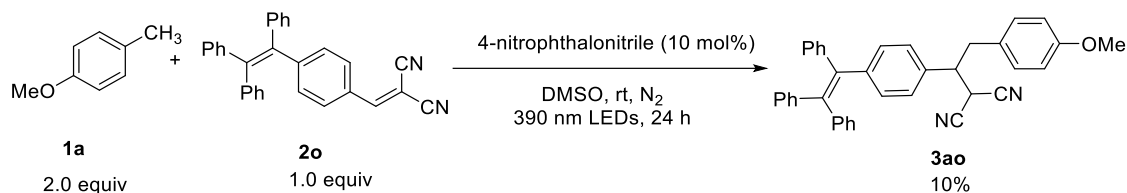

Following Typical Procedure 2, the reaction of **1a** (48.4 mg, 0.4 mmol), **2o** (81.6 mg, 0.2 mmol), and 4-nitrophthalonitrile (3.4 mg, 0.02 mmol) in DMSO (2.0 mL) afforded **3ao** (10.5 mg, 10%) (eluent: petroleum ether/ethyl acetate = 100/1 to 20/1): yellow oil.  $^1\text{H}$  NMR (400 MHz,  $\text{CDCl}_3$ )  $\delta$  7.15-6.97 (m, 21 H, Ar-H), 6.84 (d,  $J = 8.8$  Hz, 2 H, Ar-H), 3.83-3.78 (m, 4 H, CH and  $\text{CH}_3$ ), 3.35-3.29 (m, 1 H, CH), 3.23-3.07 (m, 2 H,  $\text{CH}_2$ ).  $^{13}\text{C}$  NMR (151 MHz,  $\text{CDCl}_3$ )  $\delta$  158.9, 144.5, 143.4, 143.3, 143.2, 141.7, 130.0, 134.5, 132.1, 131.9, 131.27, 131.25, 130.0, 128.4, 128.4, 127.74, 127.69, 127.65, 127.3, 126.61, 126.57, 114.3, 112.1, 111.5, 55.3, 48.2, 37.7, 28.3. IR  $\nu$  (neat,  $\text{cm}^{-1}$ ) 3054, 2255.

HRMS (ESI)  $m/z$ :  $[M]^+$  Calcd for  $C_{38}H_{30}N_2O$  530.2353; found 530.2333.

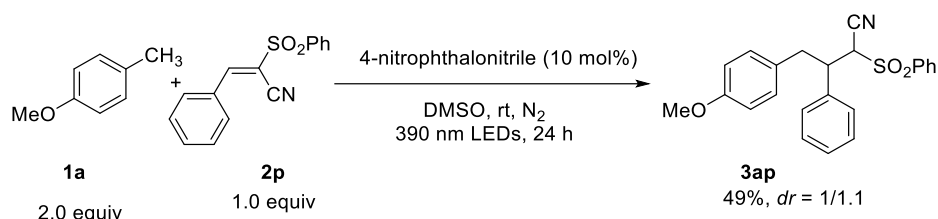

Following Typical Procedure 2, the reaction of **1a** (50  $\mu$ L,  $d = 0.969$  g/mL, 48.5 mg, 0.4 mmol), **2p** (53.8 mg, 0.2 mmol), and 4-nitrophthalonitrile (3.5 mg, 0.02 mmol) in DMSO (2.0 mL) afforded **3ap** (38.4 mg, 49%,  $dr = 1/1.1$ ) (eluent: petroleum ether/ethyl acetate = 50/1 to 20/1): colorless oil.  $^1\text{H NMR}$  (400 MHz,  $\text{CDCl}_3$ )  $\delta$  8.13-7.99 (m, 1 H, Ar-H), 7.81-7.09 (m, 10 H, Ar-H), 6.97-6.63 (m, 3 H, Ar-H), 4.20-4.09 (m, 1 H, CH), 4.02-3.52 (m, 5 H,  $\text{CH}_2$  and  $\text{CH}_3$ ), 3.23-3.07 (m, 1 H, CH).  $^{13}\text{C NMR}$  (101 MHz,  $\text{CDCl}_3$ )  $\delta$  major isomer: 158.8, 137.1, 136.4, 134.5, 129.9, 129.7, 129.3, 128.6, 128.2, 127.9, 114.4, 113.5, 61.0, 55.3, 45.6, 40.5. minor isomer: 158.1, 138.8, 136.8, 135.2, 130.08, 129.7, 129.0, 128.73, 128.66, 128.0, 113.6, 113.2, 62.8, 55.1, 44.3, 37.3. IR  $\nu$  (neat,  $\text{cm}^{-1}$ ) 3032, 2245. HRMS (ESI)  $m/z$ :  $[M + \text{Na}]^+$  Calcd for  $C_{23}H_{21}NO_3\text{SNa}$  414.1134; found 414.1145.

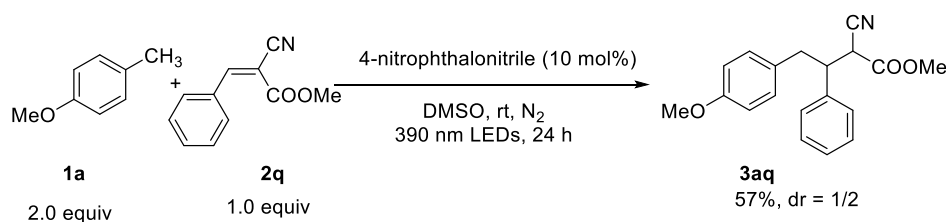

Following Typical Procedure 2, the reaction of **1a** (48.9 mg, 0.4 mmol), **2q** (37.3 mg, 0.2 mmol), and 4-nitrophthalonitrile (3.5 mg, 0.02 mmol) in DMSO (2.0 mL) afforded **3aq** (35.2 mg, 57%,  $dr = 1/2$ ) (eluent: petroleum ether/ethyl acetate = 100/1 to 20/1): colorless oil.  $^1\text{H NMR}$  (400 MHz,  $\text{CDCl}_3$ )  $\delta$  7.89-7.23 (m, 5 H, Ar-H), [7.22-7.06 (m, 1.35 H), 7.04-6.99 (m, 0.67 H), Ar-H], [6.89-6.84 (m, 1.32 H), 6.79-6.73 (m, 0.66 H), Ar-H], [3.79 (s, 2 H), 3.75 (s, 1 H),  $\text{CH}_3$ ], 3.75-3.68 (m, 1 H, CH), 3.67-3.59 (m, 1 H, CH), [3.583 (s, 1 H), 3.576 (s, 2 H),  $\text{CH}_3$ ], 3.29-3.06 (m, 2 H,  $\text{CH}_2$ ).  $^{13}\text{C NMR}$  (101 MHz,  $\text{CDCl}_3$ )  $\delta$  major isomer: 166.0, 158.6, 138.4, 130.0, 129.7, 128.7, 127.9, 127.8, 115.2, 114.3, 55.2, 53.2, 47.5, 42.6, 38.6. minor isomer: 165.5, 158.3, 139.0, 130.3, 129.6, 128.8, 128.1, 127.9, 115.8, 113.7, 55.1, 53.3, 47.7, 43.7, 37.6. IR  $\nu$  (neat,  $\text{cm}^{-1}$ ) 2248, 1746. HRMS (ESI)  $m/z$ :  $[M + \text{Na}]^+$  Calcd for  $C_{19}H_{19}NO_3\text{Na}$  332.1257; found 332.1273.

## Mechanistic studies for the arene activation

### 1 The light on/off experiment

The light on/off experiments were conducted by monitoring the product formation using 2-(4-fluorobenzylidene)malononitrile (**2h**) as a substrate. The reaction was proceeded smoothly under irradiation of blue LED and ceased when the light was turned off, indicating that the light plays a crucial role for the transformation.

**Supplementary Table 5.** The light on/off experiment

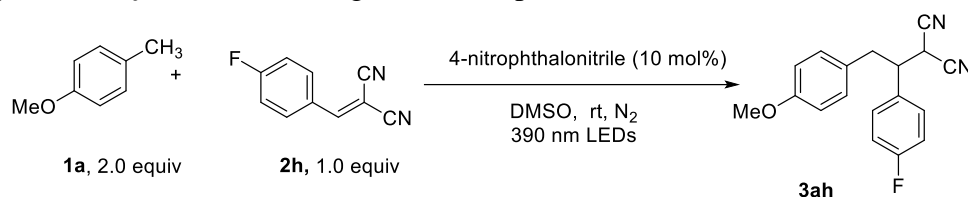

| Time scale | Light on/off | Yield <sup>a</sup> / % |
|------------|--------------|------------------------|
| 0-10 h     | On           | 37                     |
| 10-15 h    | Off          | 37                     |
| 15-20 h    | On           | 48                     |
| 20-25 h    | Off          | 48                     |
| 25-30 h    | On           | 62                     |
| 30-35 h    | Off          | 63                     |
| 35-40 h    | On           | 74                     |
| 45-50 h    | Off          | 74                     |
| 35-40 h    | On           | 83                     |
| 40-45 h    | Off          | 83                     |

<sup>a</sup> All yields were based on crude <sup>19</sup>F NMR.

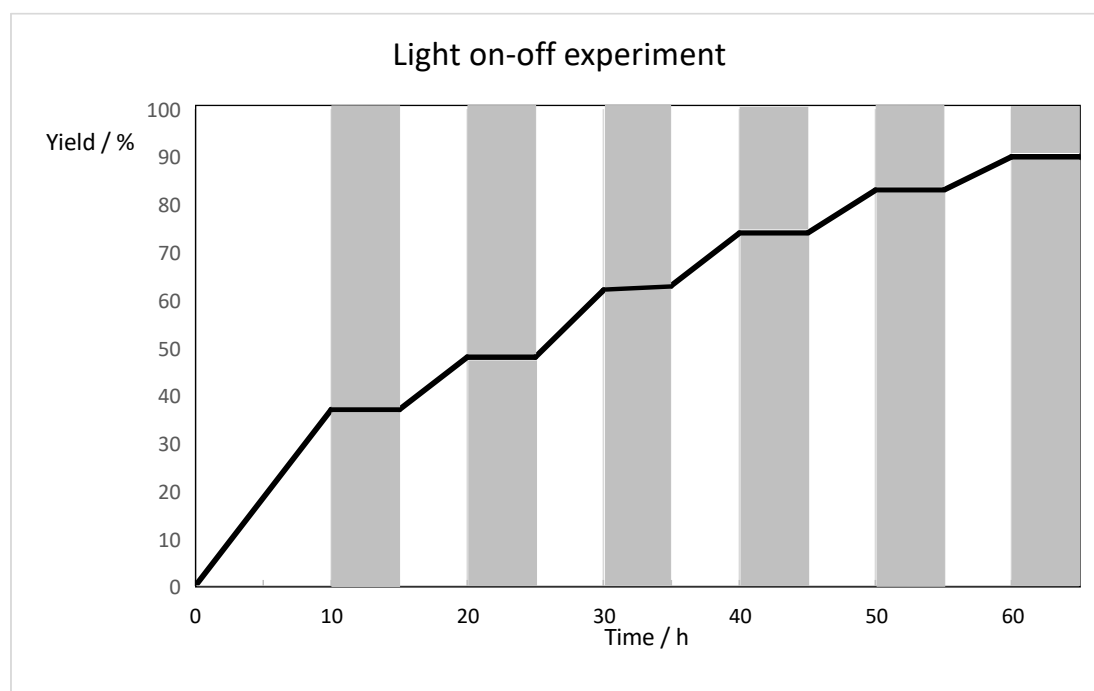

## 2. The radical-captured experiment

The reaction of **1a** with TEMPO in DMSO under N<sub>2</sub> would produce the radical captured product **1a-TEMPO**, which could be detected by high resolution mass spectroscopy. HRMS (ESI) m/z: [M + H]<sup>+</sup> Calcd for C<sub>17</sub>H<sub>28</sub>NO<sub>2</sub> 278.2115; found 278.2105.

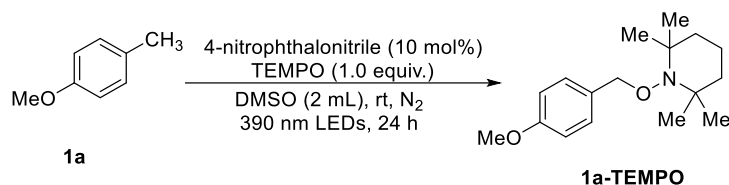

Item name: xt-6-34  
Item description:

Channel name: 2: Average Time 0.1719 min : TOF MS (50-2000) 6eV ESI+ : Centroided : Combined

1.14e7

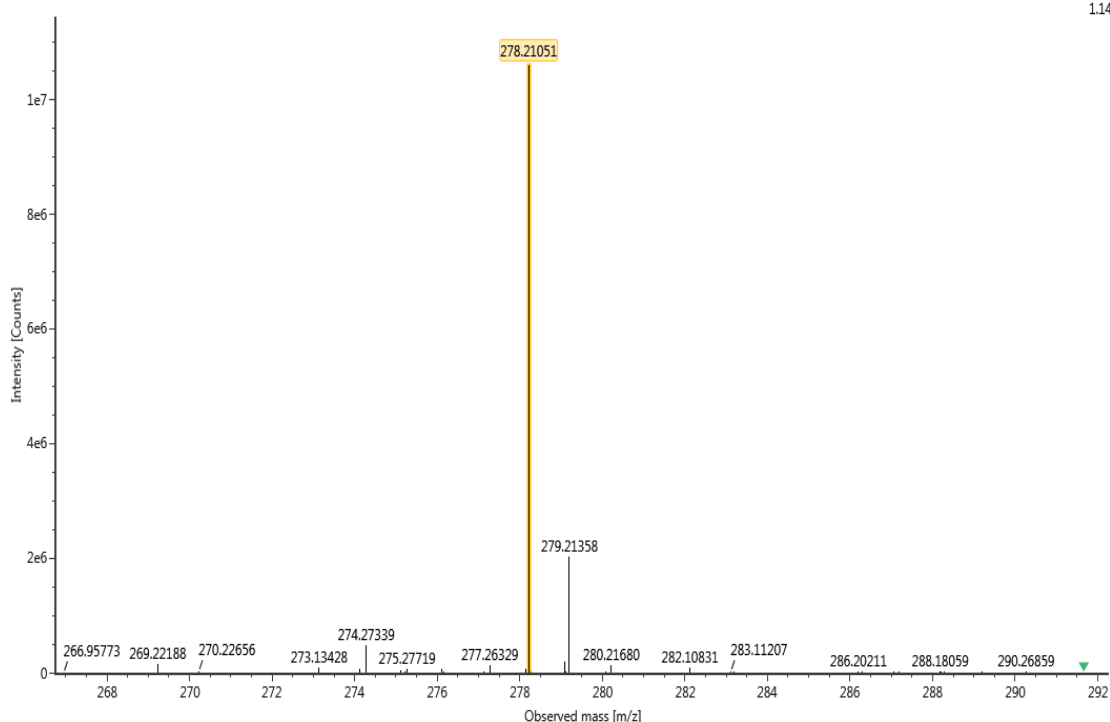

**Supplementary Figure 5: The HRMS spectrum of 1a-TEMPO.** HRMS (ESI) m/z: [M + H]<sup>+</sup> Calcd for C<sub>17</sub>H<sub>28</sub>NO<sub>2</sub> 278.2115; found 278.2105.

The reaction of **1a**, **2a** with TEMPO in DMSO under N<sub>2</sub> would produce the radical captured product **1a-TEMPO**, which could be detected by high resolution mass spectroscopy. HRMS (ESI) m/z: [M + H]<sup>+</sup> Calcd for C<sub>17</sub>H<sub>28</sub>NO<sub>2</sub> 278.2115; found 278.2111.

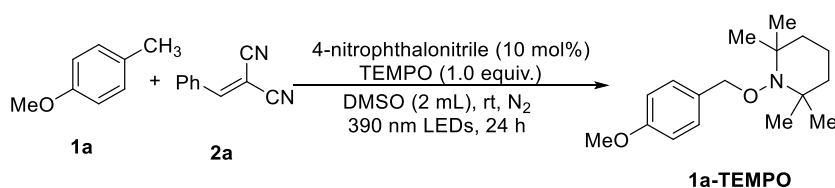

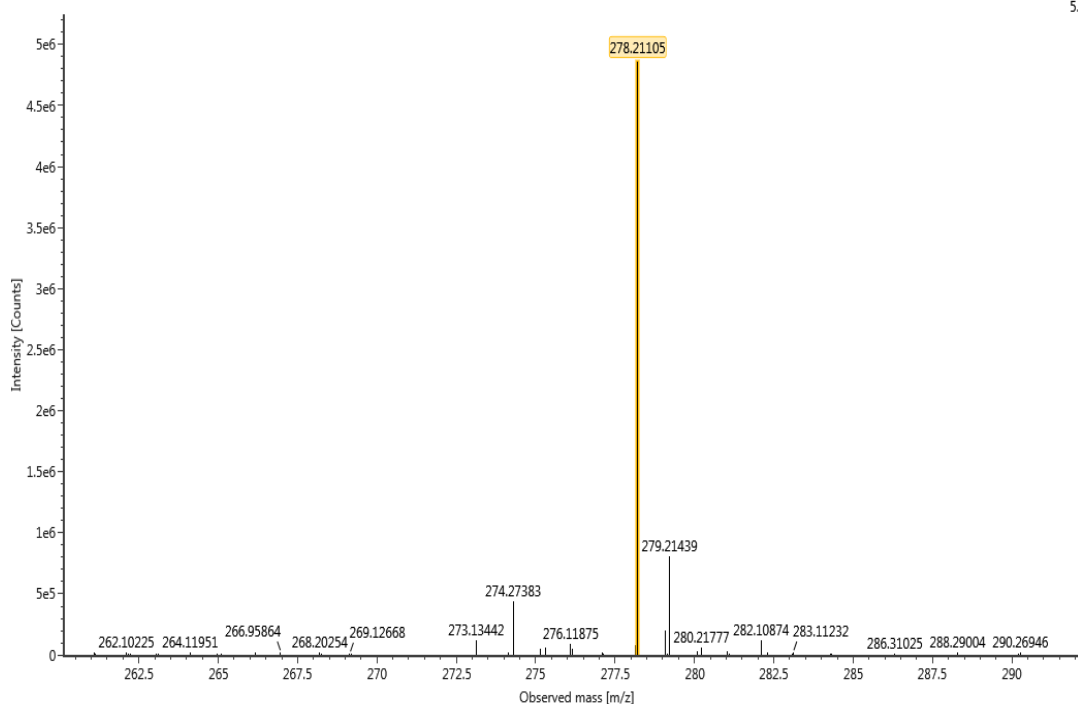

**Supplementary Figure 6: The HRMS spectrum of 1a-TEMPO.** HRMS (ESI) m/z:  $[M + H]^+$  Calcd for  $C_{17}H_{28}NO_2$  278.2115; found 278.2111.

### 3. KIE experiment

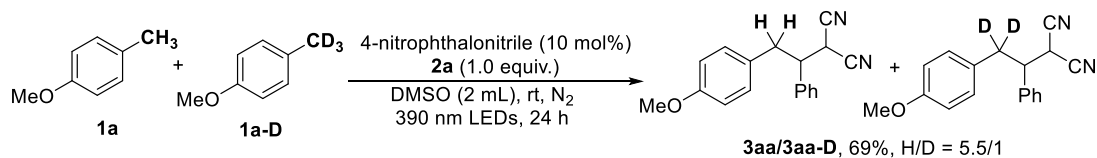

To a 4 mL reaction tube were added **1a** (24.3 mg, 0.2 mmol), **1a-D** (25.1 mg, 0.2 mmol), **2a** (30.9 mg, 0.2 mmol), and 4-nitrophthalonitrile (3.3 mg, 0.02 mmol) in DMSO (2.0 mL) in an  $N_2$  glovebox. The reaction tube was transferred out of glovebox. Under irradiation at 390 nm LEDs, the resulting mixture was stirred for 24 hours at rt. Evaporation and flash chromatography on silica gel afforded **3aa/3aa-D** (38.1 mg, 69%) (eluent: petroleum ether/ethyl acetate = 50/1 to 20/1). The KIE was determined to be  $k_H/k_D = 5.5/1$  by the analysis of the  $^1H$  NMR (400 MHz,  $CDCl_3$ ) 7.48-7.35 (m, 5 H, Ar-H), 7.11 (d,  $J = 8.8$  Hz, 2 H, Ar-H), 6.86 (d,  $J = 8.8$  Hz, 2 H, Ar-H), 3.86 (d,  $J = 4.8$  Hz, 1 H, CH), 3.80 (s, 3 H,  $CH_3$ ), 3.46-3.38 (m, 1 H, CH), 3.27-3.15 (m, 1.69 H,  $CH_2$ ).

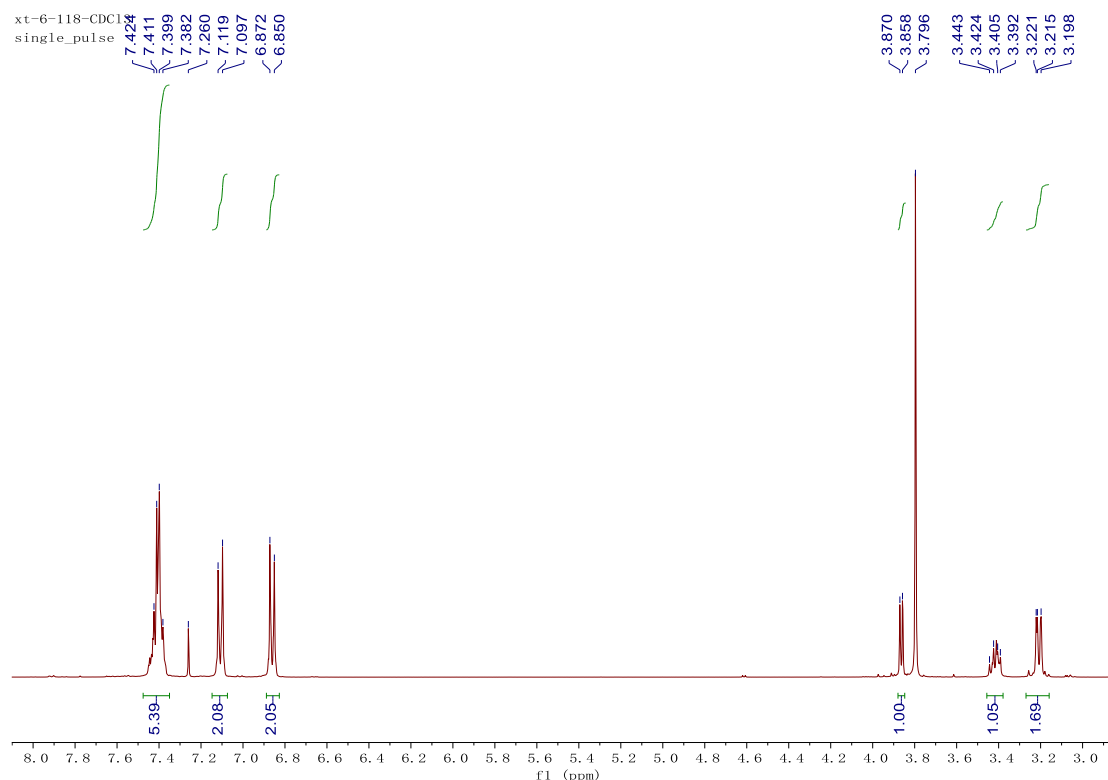

**Supplementary Figure 7: The <sup>1</sup>H NMR spectrum of 3aa/3aa-D.** The KIE was determined to be  $k_H/k_D = 5.5/1$  by the analysis of the <sup>1</sup>H NMR (400 MHz, CDCl<sub>3</sub>).

### 5. Cyclic Voltammetry Measurements

For all cyclic voltammetry (CV) measurements, a glassy carbon disk electrode (diameter 3 mm) was used as the working electrode. A silver wire coated with AgCl immersed in a 3.5 M aqueous solution of KCl and separated from the analyte by a fritted glass disk was employed as the reference electrode. A Pt wire counter-electrode completed the electrochemical setup. The scan rate was 0.1 v/s.

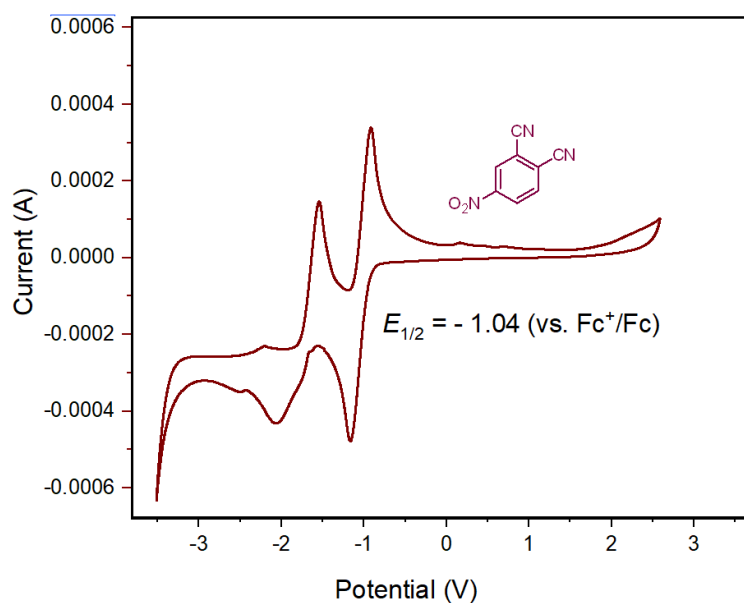

**Supplementary Figure 8: Cyclic voltammogram 1.** Cyclic voltammogram for 4-

nitrophthalonitrile [0.002 M] in [0.01 M] TBAPF<sub>6</sub> in CH<sub>3</sub>CN. Measurement started by reduction from 0 to 2.5 V, followed by oxidation from 2.5 to -3.0 V, and finishing at 0 V. Glassy carbon electrode S27 working electrode, Ag/AgCl (KCl 3.5 M) reference electrode, Pt wire auxiliary electrode.

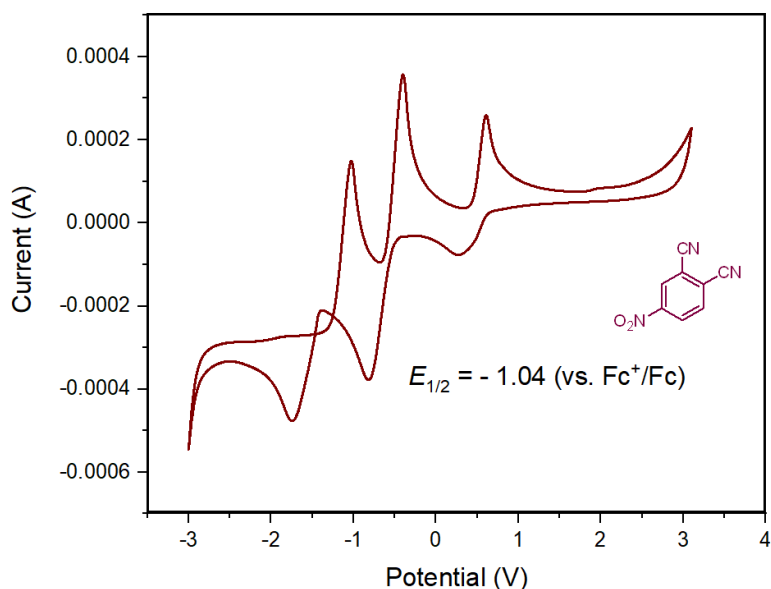

**Supplementary Figure 9: Cyclic voltammogram 2.** Cyclic voltammogram for 4-nitrophthalonitrile [0.002 M] and ferrocene [0.002 M] in [0.01 M] TBAPF<sub>6</sub> in CH<sub>3</sub>CN. Measurement started by reduction from 0 to 2.5 V, followed by oxidation from 2.5 to -3.0 V, and finishing at 0 V. Glassy carbon electrode S27 working electrode, Ag/AgCl (KCl 3.5 M) reference electrode, Pt wire auxiliary electrode.

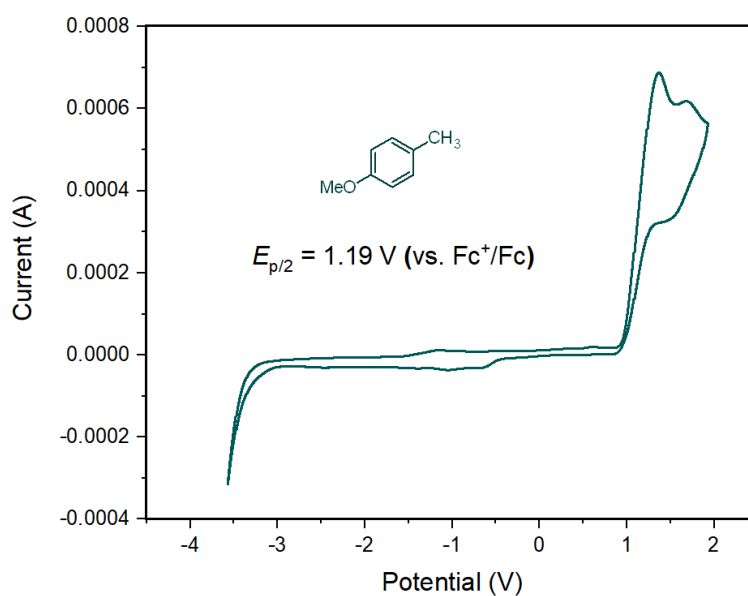

**Supplementary Figure 10: Cyclic voltammogram 3.** Cyclic voltammogram for 4-methylanisole [0.002 M] in [0.01 M] TBAPF<sub>6</sub> in CH<sub>3</sub>CN. Measurement started by reduction from 0 to 2.5 V, followed by oxidation from 2.5 to -3.0 V, and finishing at 0 V.



V. Glassy carbon electrode S27 working electrode, Ag/AgCl (KCl 3.5 M) reference electrode, Pt wire auxiliary electrode.

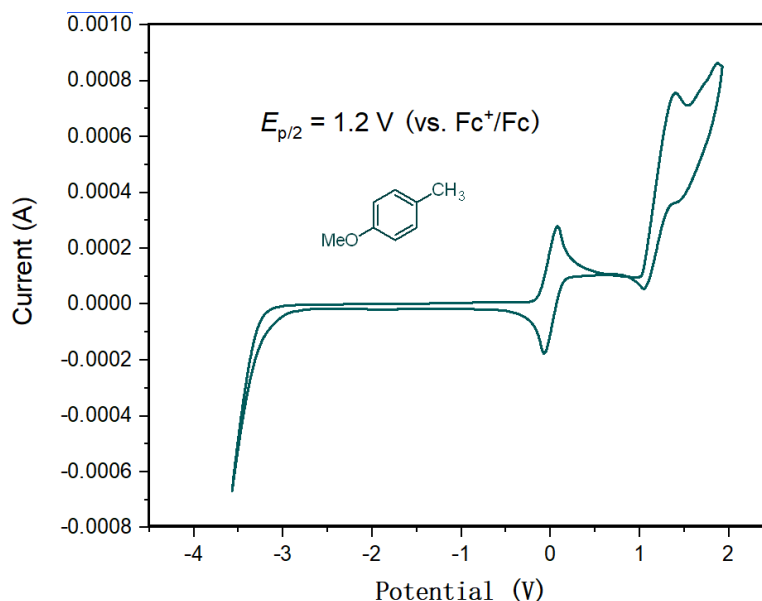

**Supplementary Figure 11: Cyclic voltammogram 4.** Cyclic voltammogram for 4-methylanisole [0.002 M] and ferrocene [0.002 M] in [0.01 M] TBAPF<sub>6</sub> in CH<sub>3</sub>CN. Measurement started by reduction from 0 to 2.5 V, followed by oxidation from 2.5 to -3.0 V, and finishing at 0 V. Glassy carbon electrode S27 working electrode, Ag/AgCl (KCl 3.5 M) reference electrode, Pt wire auxiliary electrode.

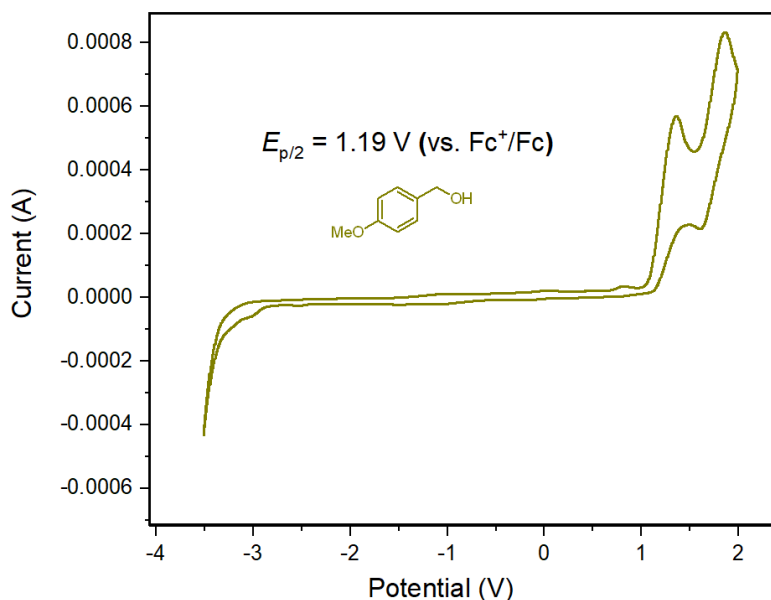

**Supplementary Figure 12: Cyclic voltammogram 5.** Cyclic voltammogram for 4-methoxybenzyl alcohol [0.002 M] in [0.01 M] TBAPF<sub>6</sub> in CH<sub>3</sub>CN. Measurement started by reduction from 0 to 2.5 V, followed by oxidation from 2.5 to -3.0 V, and finishing at 0 V. Glassy carbon electrode S27 working electrode, Ag/AgCl (KCl 3.5 M) reference electrode, Pt wire auxiliary electrode.

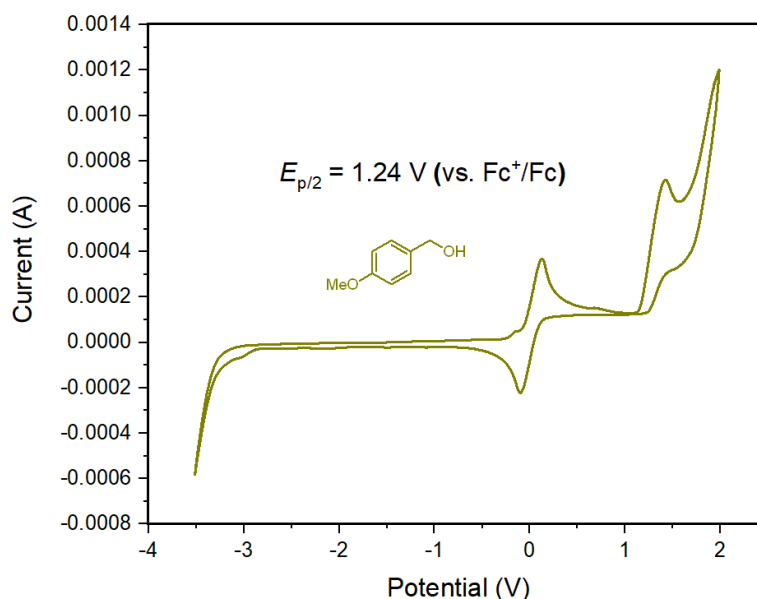

**Supplementary Figure 13: Cyclic voltammogram 6.** Cyclic voltammogram for 4-methoxybenzyl alcohol [0.002 M] and ferrocene [0.002 M] in [0.01 M] TBAPF<sub>6</sub> in CH<sub>3</sub>CN. Measurement started by reduction from 0 to 2.5 V, followed by oxidation from 2.5 to -3.0 V, and finishing at 0 V. Glassy carbon electrode S27 working electrode, Ag/AgCl (KCl 3.5 M) reference electrode, Pt wire auxiliary electrode.

## 6. Determination of quantum yield

### (1) Determination of the light intensity at 390 nm:

The photon flux of the spectrophotometer was determined by standard ferrioxalate actinometry (referred to the reported procedure: M. A. Cismesia, et al., *Chem. Sci.* **2015**, *6*, 5426-5434). A 0.006 M solution of ferrioxalate was prepared by dissolving 147.6 mg of potassium ferrioxalate hydrate in 50 mL of 0.05 M H<sub>2</sub>SO<sub>4</sub>. A buffered solution of phenanthroline was prepared by dissolving 100.0 mg of phenanthroline and 22.1 mg of sodium acetate in 100 mL of 0.5 M H<sub>2</sub>SO<sub>4</sub>. Both solutions were stored in the dark. To determine the photon flux of the spectrophotometer, 5.0 mL of the ferrioxalate solution was placed in a 10 mL quartz reaction tube (*V* = 5.0 mL) and irradiated for 20.0 seconds with a commercial 100 W 390 nm laser. After irradiation, the solution was shielded with aluminum foil and 0.88 mL of the phenanthroline solution was added. The solution was then allowed to rest for 1 h to allow the ferrous ions to coordinate to the phenanthroline completely. The absorbance of the solution was measured at 510 nm. A non-irradiated sample was also prepared and the absorbance at 510 nm measured. Conversion was calculated using eq 1.

$$\text{mol Fe}^{2+} = (V \cdot \Delta A)/(l \cdot \varepsilon) \quad (1)$$

Where  $V$  is the total volume (0.00588 L) of the solution after addition of phenanthroline,  $\Delta A$  is the difference in absorbance at 510 nm between the irradiated and non-irradiated solutions,  $l$  is the path length (1.000 cm), and  $\varepsilon$  is the molar absorptivity at 510 nm (11,100 L mol<sup>-1</sup> cm<sup>-1</sup>). The photon flux can be calculated using eq 2.

$$\text{Photon flux} = (\text{mol Fe}^{2+})/(\Phi \cdot t \cdot f) \quad (2)$$

Where  $\Phi$  is the quantum yield for the ferrioxalate actinometer (1.19 for a 0.006 M solution at  $\lambda = 390$  nm),  $t$  is the time (20.0 s), and  $f$  is the fraction of light absorbed at  $\lambda = 390$  nm ( $A = 2.1570$ , see Supplementary Figure 14). The photon flux was calculated to be  $1.85 \times 10^{-8}$  einstein s<sup>-1</sup>.

$$\text{mol Fe}^{2+} = (0.00588 \text{ L} \cdot 0.8261)/(1.000 \text{ cm} \cdot 11100 \text{ L mol}^{-1} \text{ cm}^{-1}) = 4.38 \times 10^{-7} \text{ mol}$$

$$\text{Photon flux} = (4.38 \times 10^{-7} \text{ mol})/(1.19 \cdot 20.0 \text{ s} \cdot 0.9930) = 1.85 \times 10^{-8} \text{ einstein s}^{-1}$$

(2) Determination of fraction of light absorbed at 390 nm for the ferrioxalate solution:

The absorbance of the above ferrioxalate solution at 390 nm was measured to be 2.1570. The fraction of light absorbed ( $f$ ) by this solution was calculated using eq 3, where  $A$  is the measured absorbance at 390 nm.

$$f = 1 - 10^{-A} \quad (3)$$



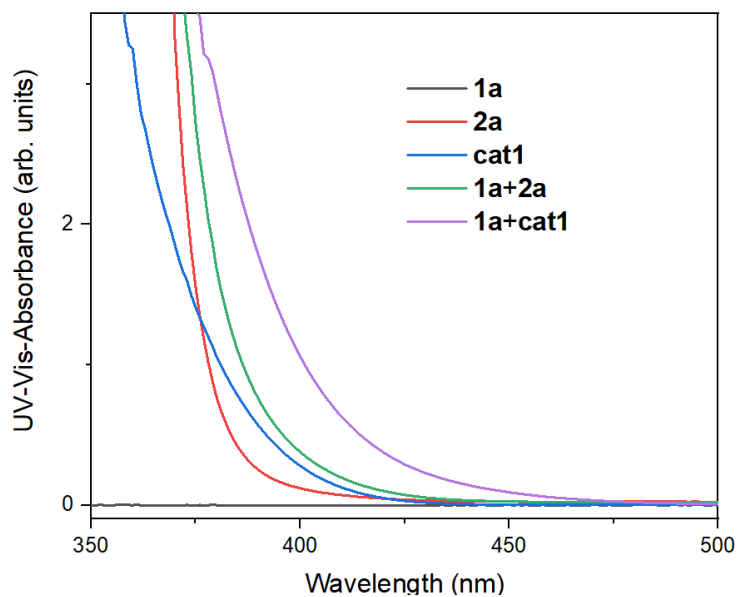

**Supplementary Figure 15: The UV-Vis absorption spectra.** The UV-Vis absorption of the solution of **1a** (0.2 M), **2a** (0.1 M), **cat1** (0.01 M), the mixture of **1a** (0.2 M) and **2a** (0.1 M), and the mixture of **1a** (0.2 M) and **cat1** (0.01 M) in DMSO

The UV-Vis absorption of the mixture of **1a** and **cat1** showcased the increasing absorption at the  $\lambda = 350 \sim 500$  nm, indicating the formed EDA complex possessed the new visible-light absorptions to facilitate the photo-excitation. Notably, the mixture of **1a** and **2a** also presented a relative smaller increasing absorption compared with **1a/cat1**, which could explain why the reaction in the absence of **cat1** could proceed in lower efficiency.

## Oxidation of e-rich aromatics

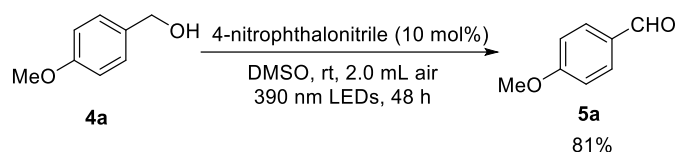

**Typical Procedure 3:** To a 4 mL vial were added **4a** (27.8 mg, 0.2 mmol), and 4-nitrophthalonitrile (3.4 mg, 0.02 mmol) in DMSO (2.0 mL) in air. Under irradiation at 390 nm LEDs, the resulting mixture in 2.0 ml air was stirred for 48 hours at rt. Saturated brine was then added and the aqueous layer was extracted with ethyl acetate (10 mL  $\times$  3), Evaporation and flash chromatography on silica gel afforded **5a** (22.1 mg, 81%) (eluent: petroleum ether/ethyl acetate = 20/1): colorless oil.  $^1\text{H}$  NMR (400 MHz,  $\text{CDCl}_3$ )  $\delta$  9.89 (s, 1 H, CHO), 7.84 (d,  $J$  = 8.8 Hz, 2 H, Ar-H), 7.01 (d,  $J$  = 8.8 Hz, 2 H, Ar-H), 3.89 (s, 3 H,  $\text{CH}_3$ ).  $^{13}\text{C}$  NMR (101 MHz,  $\text{CDCl}_3$ )  $\delta$  190.8, 164.6, 132.0, 129.9, 114.3, 55.6.

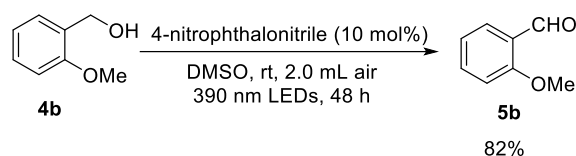

Following Typical Procedure 3, the reaction of **4b** (27.7 mg, 0.2 mmol), and 4-nitrophthalonitrile (3.3 mg, 0.02 mmol) in DMSO (2.0 mL) afforded **5b** (22.5 mg, 82%) (eluent: petroleum ether/ethyl acetate = 20/1): colorless oil.  $^1\text{H}$  NMR (400 MHz,  $\text{CDCl}_3$ ) 10.47 (s, 1 H, CHO), 7.85-7.79 (m, 1 H, Ar-H), 7.59-7.52 (m, 1 H, Ar-H), 7.06-6.95 (m, 2 H, Ar-H), 3.92 (s, 3 H,  $\text{CH}_3$ ).  $^{13}\text{C}$  NMR (101 MHz,  $\text{CDCl}_3$ )  $\delta$  189.8, 161.8, 135.9, 128.5, 124.8, 120.6, 111.6, 55.6.

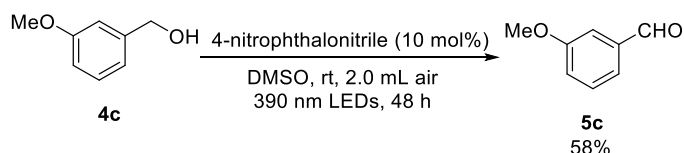

Following Typical Procedure 3, the reaction of **4c** (27.3 mg, 0.2 mmol), and 4-nitrophthalonitrile (3.8 mg, 0.02 mmol) in DMSO (2.0 mL) afforded **5c** (15.7 mg, 58%) (eluent: petroleum ether/ethyl acetate = 20/1): colorless liquid.  $^1\text{H}$  NMR (400 MHz,  $\text{CDCl}_3$ ) 9.98 (s, 1 H, CHO), 7.49-7.38 (m, 3 H, Ar-H), 7.22-7.14 (m, 1 H, Ar-H), 3.87 (s, 3 H,  $\text{CH}_3$ ).  $^{13}\text{C}$  NMR (101 MHz,  $\text{CDCl}_3$ )  $\delta$  192.1, 160.1, 137.8, 130.0, 123.6, 121.5, 112.0, 55.5.

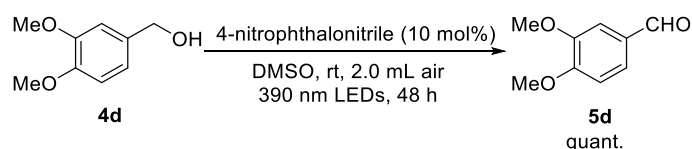

Following Typical Procedure 3, the reaction of **4d** (33.9 mg, 0.2 mmol), and 4-nitrophthalonitrile (3.6 mg, 0.02 mmol) in DMSO (2.0 mL) afforded **5d** (35.8 mg, quant.) (eluent: petroleum ether/ethyl acetate = 10/1): colorless liquid.  $^1\text{H}$  NMR (400 MHz,  $\text{CDCl}_3$ ) 9.86-9.74 (m, 1 H, CHO), 7.51-7.33 (m, 2 H, Ar-H), 7.01-6.87 (m, 1 H, Ar-H), 4.00-3.83 (m, 6 H,  $\text{CH}_3 \times 2$ ).  $^{13}\text{C}$  NMR (101 MHz,  $\text{CDCl}_3$ )  $\delta$  190.9, 154.49,

149.59, 130.1, 126.8, 110.3, 108.8, 56.2, 56.0.

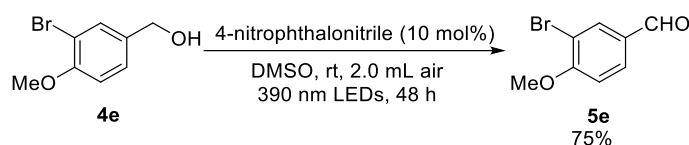

Following Typical Procedure 3, the reaction of **4e** (43.4 mg, 0.2 mmol), and 4-nitrophthalonitrile (3.6 mg, 0.02 mmol) in DMSO (2.0 mL) afforded **5e** (32.3 mg, 75%) (eluent: petroleum ether/ethyl acetate = 50/1 to 20/1): colorless liquid.  $^1\text{H}$  NMR (400 MHz,  $\text{CDCl}_3$ ) 9.85 (s, 1 H, CHO), 8.09 (s, 1 H, Ar-H), 7.87-7.79 (m, 2 H, Ar-H), 7.01 (d,  $J = 8.8$  Hz, 1 H, Ar-H), 3.99 (s, 3 H,  $\text{CH}_3$ ).  $^{13}\text{C}$  NMR (101 MHz,  $\text{CDCl}_3$ )  $\delta$  189.6, 160.6, 134.6, 131.2, 130.7, 112.6, 111.5, 56.6.

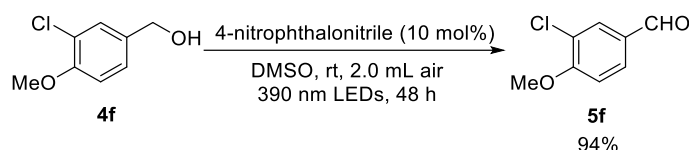

Following Typical Procedure 3, the reaction of **4f** (34.8 mg, 0.2 mmol), and 4-nitrophthalonitrile (3.6 mg, 0.02 mmol) in DMSO (2.0 mL) afforded **5f** (32.3 mg, 94%) (eluent: petroleum ether/ethyl acetate = 20/1): colorless liquid.  $^1\text{H}$  NMR (400 MHz,  $\text{CDCl}_3$ ) 9.85 (s, 1 H, CHO), 7.90 (d,  $J = 2.0$  Hz, 1 H, Ar-H), 7.81-7.75 (m, 1 H, Ar-H), 7.04 (d,  $J = 8.8$  Hz, 1 H, Ar-H), 3.99 (s, 3 H,  $\text{CH}_3$ ).  $^{13}\text{C}$  NMR (101 MHz,  $\text{CDCl}_3$ )  $\delta$  189.7, 159.8, 131.2, 130.5, 130.3, 123.7, 111.7, 56.5.

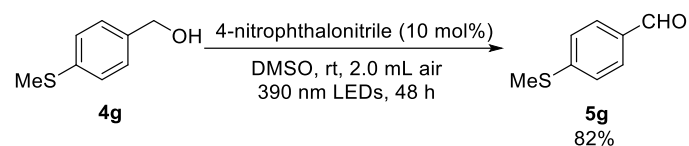

Following Typical Procedure 3, the reaction of **4g** (31.1 mg, 0.2 mmol), and 4-nitrophthalonitrile (3.6 mg, 0.02 mmol) in DMSO (2.0 mL) afforded **5g** (25.3 mg, 82%) (eluent: petroleum ether/ethyl acetate = 20/1): colorless liquid.  $^1\text{H}$  NMR (400 MHz,  $\text{CDCl}_3$ ) 9.91 (s, 1 H, CHO), 7.76 (d,  $J = 8.4$  Hz, 2 H, Ar-H), 7.31 (d,  $J = 8.4$  Hz, 1 H, Ar-H), 2.53 (s, 3 H,  $\text{CH}_3$ ).  $^{13}\text{C}$  NMR (101 MHz,  $\text{CDCl}_3$ )  $\delta$  191.2, 147.9, 132.9, 129.9, 125.1, 14.6.

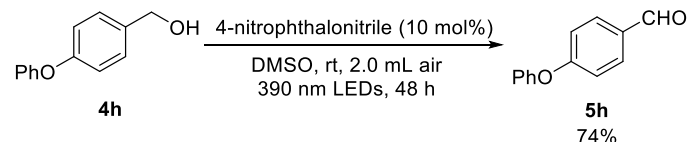

Following Typical Procedure 3, the reaction of **4h** (40.4 mg, 0.2 mmol), and 4-nitrophthalonitrile (3.6 mg, 0.02 mmol) in DMSO (2.0 mL) afforded **5h** (29.4 mg, 74%) (eluent: petroleum ether/ethyl acetate = 20/1): colorless oil.  $^1\text{H}$  NMR (400 MHz,  $\text{CDCl}_3$ ) 9.92 (s, 1 H, CHO), 7.85 (d,  $J = 8.8$  Hz, 2 H, Ar-H), 7.46-7.37 (m, 2 H, Ar-H), 7.26-7.18 (m, 1 H, Ar-H), 7.13-7.03 (m, 4 H, Ar-H).  $^{13}\text{C}$  NMR (101 MHz,  $\text{CDCl}_3$ )  $\delta$  190.8, 132.0, 130.1, 125.0, 124.9, 120.4, 117.6.

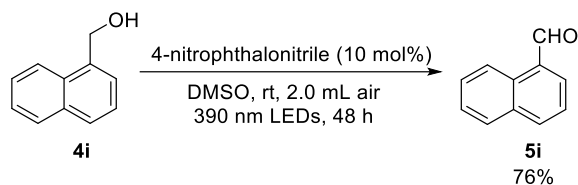

Following Typical Procedure 3, the reaction of **4i** (31.4 mg, 0.2 mmol), and 4-nitrophthalonitrile (3.3 mg, 0.02 mmol) in DMSO (2.0 mL) afforded **5i** (23.7 mg, 76%) (eluent: petroleum ether/ethyl acetate = 20/1): colorless liquid.  $^1\text{H}$  NMR (400 MHz,  $\text{CDCl}_3$ ) 10.40 (s, 1 H, CHO), 9.26 (d,  $J = 8.8$  Hz, 2 H, Ar-H), 8.10 (d,  $J = 8.4$  Hz, 1 H, Ar-H), 8.02-7.97 (m, 1 H, Ar-H), 7.92 (d,  $J = 8.0$  Hz, 1 H, Ar-H), 7.76-7.65 (m, 1 H, Ar-H), 7.65-7.56 (m, 2 H, Ar-H).  $^{13}\text{C}$  NMR (101 MHz,  $\text{CDCl}_3$ )  $\delta$  193.5, 136.7, 135.3, 133.7, 131.4, 130.5, 129.0, 128.4, 126.9, 124.8.

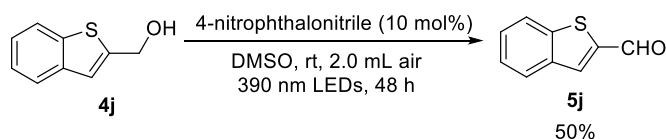

Following Typical Procedure 3, the reaction of **4j** (33.0 mg, 0.2 mmol), and 4-nitrophthalonitrile (3.6 mg, 0.02 mmol) in DMSO (2.0 mL) afforded **5j** (16.3 mg, 50%) (eluent: petroleum ether/ethyl acetate = 20/1): colorless liquid.  $^1\text{H}$  NMR (400 MHz,  $\text{CDCl}_3$ ) 10.11 (s, 1 H, CHO), 8.04 (s, 1 H, Ar-H), 7.98-7.86 (m, 2 H, Ar-H), 7.56-7.41 (m, 2 H, Ar-H).  $^{13}\text{C}$  NMR (101 MHz,  $\text{CDCl}_3$ )  $\delta$  184.7, 143.3, 142.7, 138.5, 134.5, 128.2, 126.3, 125.2, 123.3.

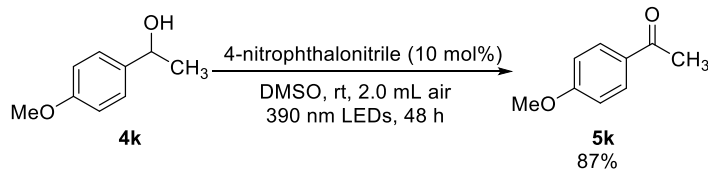

Following Typical Procedure 3, the reaction of **4k** (30.5 mg, 0.2 mmol), and 4-nitrophthalonitrile (3.6 mg, 0.02 mmol) in DMSO (2.0 mL) afforded **5k** (25.9 mg, 87%) (eluent: petroleum ether/ethyl acetate = 10/1): colorless liquid.  $^1\text{H}$  NMR (400 MHz,  $\text{CDCl}_3$ ) 7.93 (d,  $J = 8.8$  Hz, 2 H, Ar-H), 6.92 (d,  $J = 9.2$  Hz, 2 H, Ar-H), 3.86 (s, 3 H,  $\text{CH}_3$ ), 2.55 (s, 3 H,  $\text{CH}_3$ ).  $^{13}\text{C}$  NMR (101 MHz,  $\text{CDCl}_3$ )  $\delta$  196.8, 163.4, 130.5, 130.3, 113.6, 55.4, 26.3. IR  $\nu$  (neat,  $\text{cm}^{-1}$ ) 3003, 1676.

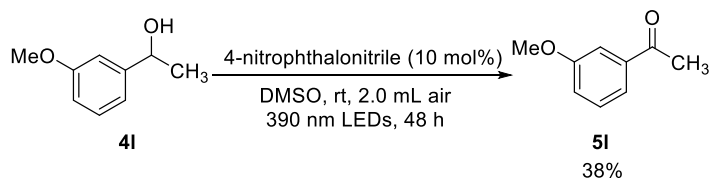

Following Typical Procedure 3, the reaction of **4l** (30.3 mg, 0.2 mmol), and 4-nitrophthalonitrile (3.6 mg, 0.02 mmol) in DMSO (2.0 mL) afforded **5l** (11.4 mg, 38%) (eluent: petroleum ether/ethyl acetate = 20/1): colorless liquid.  $^1\text{H}$  NMR (400 MHz,  $\text{CDCl}_3$ ) 7.52 (d,  $J = 7.6$  Hz, 1 H, Ar-H), 7.48-7.45 (m, 1 H, Ar-H), 7.38-7.32 (m, 1 H, Ar-H), 7.12-7.07 (m, 1 H, Ar-H), 3.84 (s, 3 H,  $\text{CH}_3$ ), 2.58 (s, 3 H,  $\text{CH}_3$ ).  $^{13}\text{C}$  NMR (101



MHz, CDCl<sub>3</sub>)  $\delta$  197.9, 159.7, 138.4, 129.5, 121.1, 119.5, 112.2, 55.3, 26.7. IR  $\nu$  (neat, cm<sup>-1</sup>) 3002, 1689.

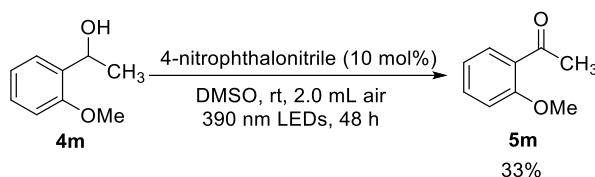

Following Typical Procedure 3, the reaction of **4m** (30.5 mg, 0.2 mmol), and 4-nitrophthalonitrile (3.6 mg, 0.02 mmol) in DMSO (2.0 mL) afforded **5m** (10.0 mg, 33%) (eluent: petroleum ether/ethyl acetate = 20/1): colorless liquid. <sup>1</sup>H NMR (400 MHz, CDCl<sub>3</sub>) 7.72-7.67 (m, 1 H, Ar-H), 7.41-7.35 (m, 1 H, Ar-H), 7.30-7.21 (m, 2 H, Ar-H), 2.59 (s, 3 H, CH<sub>3</sub>), 2.53 (s, 3 H, CH<sub>3</sub>). <sup>13</sup>C NMR (101 MHz, CDCl<sub>3</sub>)  $\delta$  201.7, 138.4, 137.6, 132.0, 131.5, 129.3, 29.6, 21.6. IR  $\nu$  (neat, cm<sup>-1</sup>) 1682.

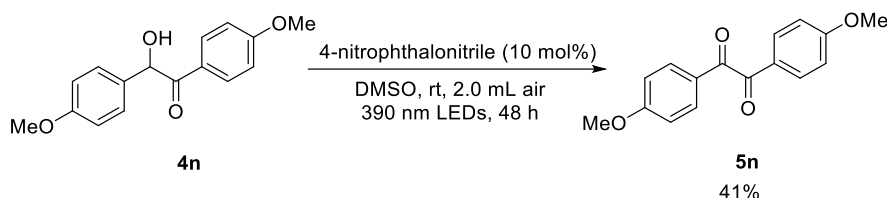

Following Typical Procedure 3, the reaction of **4n** (54.2 mg, 0.2 mmol), and 4-nitrophthalonitrile (3.6 mg, 0.02 mmol) in DMSO (2.0 mL) afforded **5n** (21.9 mg, 41%) (eluent: petroleum ether/ethyl acetate = 50/1): yellow liquid. <sup>1</sup>H NMR (400 MHz, CDCl<sub>3</sub>) 7.94 (d, *J* = 8.8 Hz, 1 H, Ar-H), 6.97 (d, *J* = 8.8 Hz, 1 H, Ar-H), 3.88 (s, 3 H, CH<sub>3</sub>). <sup>13</sup>C NMR (101 MHz, CDCl<sub>3</sub>)  $\delta$  193.5, 164.8, 132.4, 126.3, 114.3, 55.6. IR  $\nu$  (neat, cm<sup>-1</sup>) 3026, 1657.

## Hydrocarboxylation of alkenes

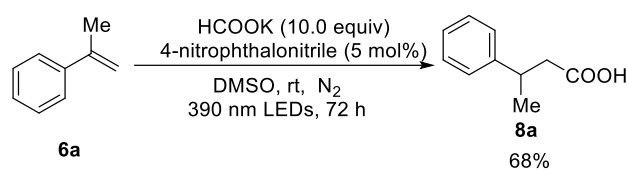

**Typical Procedure 4:** To a 4 mL vial were added **6a** (23.8 mg, 0.2 mmol), HCOOK (168.2 mg, 2.0 mmol), and 4-nitrophthalonitrile (1.8 mg, 0.01 mmol) in DMSO (2.0 mL) in an N<sub>2</sub> glovebox. The vial was sealed and transferred out of glovebox. Under irradiation at 390 nm LEDs, the resulting mixture was stirred for 72 hours at rt. The mixture was acidified with 2 mL dilute HCl (2 N) and quenched with H<sub>2</sub>O and the aqueous layer was extracted with ethyl acetate (10 mL × 3). Evaporation and flash chromatography on silica gel afforded **8a** (22.4 mg, 68%) (eluent: petroleum ether/ethyl acetate = 10/1 to 2/1): oil. <sup>1</sup>H NMR (400 MHz, CDCl<sub>3</sub>) δ 7.34-7.28 (m, 2 H, Ar-H), 7.25-7.18 (m, 3 H, Ar-H), 3.34-3.22 (m, 1 H, CH), 2.73-2.53 (m, 2 H, CH<sub>2</sub>), 1.32 (d, *J* = 6.8 Hz, 3 H, CH<sub>3</sub>). <sup>13</sup>C NMR (101 MHz, CDCl<sub>3</sub>) δ 178.3, 145.4, 128.5, 126.7, 126.5, 42.5, 36.1, 21.8. IR ν (neat, cm<sup>-1</sup>) 3026, 1707. The <sup>1</sup>H NMR spectra are matching with the known literature.<sup>18</sup>

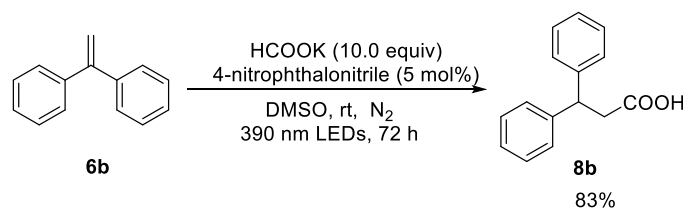

Following Typical Procedure 4, the reaction of **6b** (35.4 mg, 0.2 mmol), HCOOK (168.2 mg, 2.0 mmol), and 4-nitrophthalonitrile (1.7 mg, 0.02 mmol) in DMSO (2.0 mL) afforded **8b** (36.7 mg, 83%) (eluent: petroleum ether/ethyl acetate = 10/1 to 1/1): white solid. <sup>1</sup>H NMR (400 MHz, CDCl<sub>3</sub>) δ 7.35-7.16 (m, 10 H, Ar-H), 4.54 (t, *J* = 7.8 Hz, 1 H, CH), 3.11 (d, *J* = 8.0 Hz, 2 H, CH<sub>2</sub>). <sup>13</sup>C NMR (101 MHz, CDCl<sub>3</sub>) δ 177.8, 143.2, 128.6, 127.6, 126.6, 46.6, 40.4. IR ν (neat, cm<sup>-1</sup>) 3025, 1702. The <sup>1</sup>H NMR spectra are matching with the known literature.<sup>18</sup>

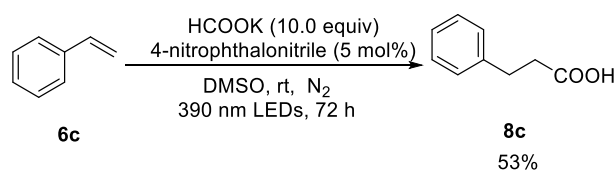

Following Typical Procedure 4, the reaction of **6c** (20.4 mg, 0.2 mmol), HCOOK (168.5 mg, 2.0 mmol), and 4-nitrophthalonitrile (1.8 mg, 0.02 mmol) in DMSO (2.0 mL) afforded **8c** (15.7 mg, 53%) (eluent: petroleum ether/ethyl acetate = 10/1 to 2/1): oil. <sup>1</sup>H NMR (400 MHz, CDCl<sub>3</sub>) δ 7.34-7.28 (m, 2 H, Ar-H), 7.26-7.19 (m, 3 H, Ar-H), 2.97 (t, *J* = 7.8 Hz, 2 H, CH<sub>2</sub>), 2.74-2.65 (m, 2 H, CH<sub>2</sub>). <sup>13</sup>C NMR (101 MHz, CDCl<sub>3</sub>) δ 179.2, 140.1, 128.5, 128.2, 126.4, 35.6, 30.5. IR ν (neat, cm<sup>-1</sup>) 3028, 1708. The <sup>1</sup>H NMR spectra are matching with the known literature.<sup>18</sup>

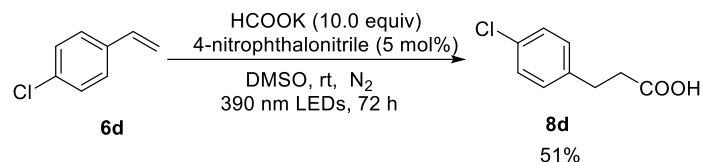

Following Typical Procedure 4, the reaction of **6d** (27.6 mg, 0.2 mmol), HCOOK (168.0 mg, 2.0 mmol), and 4-nitrophthalonitrile (1.9 mg, 0.02 mmol) in DMSO (2.0 mL) afforded **8d** (18.7 mg, 51%) (eluent: petroleum ether/ethyl acetate = 10/1 to 2/1): white solid.  $^1\text{H NMR}$  (400 MHz,  $\text{CDCl}_3$ )  $\delta$  7.46-7.10 (m, 5 H, Ar-H), 2.93 (t,  $J = 7.6$  Hz, 2 H,  $\text{CH}_2$ ), 2.66 (t,  $J = 7.8$  Hz, 2 H,  $\text{CH}_2$ ).  $^{13}\text{C NMR}$  (101 MHz,  $\text{CDCl}_3$ )  $\delta$  177.6, 138.5, 132.2, 129.7, 128.7, 35.2, 29.9. IR  $\nu$  (neat,  $\text{cm}^{-1}$ ) 3027, 1711. The  $^1\text{H NMR}$  spectra are matching with the known literature.<sup>18</sup>

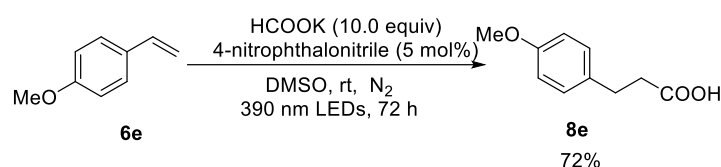

Following Typical Procedure 4, the reaction of **6e** (26.7 mg, 0.2 mmol), HCOOK (168.2 mg, 2.0 mmol), and 4-nitrophthalonitrile (1.9 mg, 0.02 mmol) in DMSO (2.0 mL) afforded **8e** (25.9 mg, 72%) (eluent: petroleum ether/ethyl acetate = 10/1 to 1/1): oil.  $^1\text{H NMR}$  (400 MHz,  $\text{CDCl}_3$ )  $\delta$  7.13 (d,  $J = 8.4$  Hz, 2 H, Ar-H), 6.84 (d,  $J = 8.4$  Hz, 2 H, Ar-H), 3.79 (s, 3 H,  $\text{OCH}_3$ ), 2.91 (t,  $J = 7.8$  Hz, 2 H,  $\text{CH}_2$ ), 2.65 (t,  $J = 7.8$  Hz, 2 H,  $\text{CH}_2$ ).  $^{13}\text{C NMR}$  (101 MHz,  $\text{CDCl}_3$ ) 178.8, 158.1, 132.2, 129.2, 113.9, 55.2, 35.9, 29.7. IR  $\nu$  (neat,  $\text{cm}^{-1}$ ) 2957, 1702. The  $^1\text{H NMR}$  spectra are matching with the known literature.<sup>18</sup>

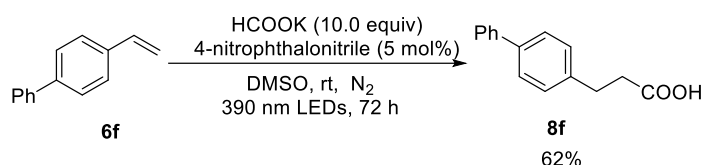

Following Typical Procedure 4, the reaction of **6f** (36.2 mg, 0.2 mmol), HCOOK (168.5 mg, 2.0 mmol), and 4-nitrophthalonitrile (1.6 mg, 0.02 mmol) in DMSO (2.0 mL) afforded **8f** (28.2 mg, 62%) (eluent: petroleum ether/ethyl acetate = 10/1 to 1/1): white solid.  $^1\text{H NMR}$  (400 MHz,  $\text{CDCl}_3$ )  $\delta$  7.65-7.52 (m, 4 H, Ar-H), 7.50-7.41 (m, 2 H, Ar-H), 7.39-7.28 (m, 3 H, Ar-H), 3.03 (t,  $J = 7.8$  Hz, 2 H,  $\text{CH}_2$ ), 2.75 (t,  $J = 7.6$  Hz, 2 H,  $\text{CH}_2$ ).  $^{13}\text{C NMR}$  (101 MHz,  $\text{CDCl}_3$ ) 179.0, 140.8, 139.3, 139.2, 128.72, 128.67, 127.3, 127.1, 127.0, 35.5, 30.2. IR  $\nu$  (neat,  $\text{cm}^{-1}$ ) 3027, 1694. The  $^1\text{H NMR}$  spectra are matching with the known literature.<sup>18</sup>

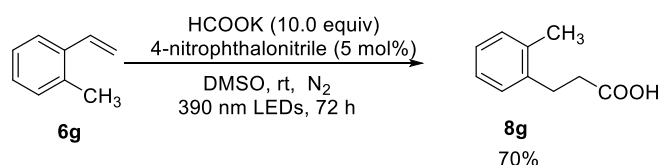

Following Typical Procedure 4, the reaction of **6g** (23.4 mg, 0.2 mmol), HCOOK (168.2 mg, 2.0 mmol), and 4-nitrophthalonitrile (1.9 mg, 0.02 mmol) in DMSO (2.0 mL) afforded **8g** (22.8 mg, 70%) (eluent: petroleum ether/ethyl acetate = 10/1 to 1/1): white solid. <sup>1</sup>H NMR (400 MHz, CDCl<sub>3</sub>) δ 7.19-7.10 (m, 4 H, Ar-H), 2.96 (t, *J* = 8.0 Hz, 2 H, CH<sub>2</sub>), 2.65 (t, *J* = 8.0 Hz, 2 H, CH<sub>2</sub>), 2.33 (s, 3 H, CH<sub>3</sub>). <sup>13</sup>C NMR (101 MHz, CDCl<sub>3</sub>) 178.8, 138.2, 136.0, 130.3, 128.4, 126.5, 126.2, 34.3, 28.0, 19.2. IR ν (neat, cm<sup>-1</sup>) 3020, 1708. The <sup>1</sup>H NMR spectra are matching with the known literature.<sup>18</sup>

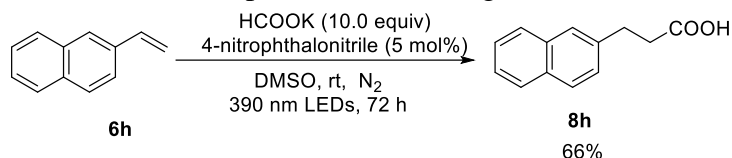

Following Typical Procedure 4, the reaction of **6h** (30.6 mg, 0.2 mmol), HCOOK (168.2 mg, 2.0 mmol), and 4-nitrophthalonitrile (1.9 mg, 0.02 mmol) in DMSO (2.0 mL) afforded **8h** (26.2 mg, 66%) (eluent: petroleum ether/ethyl acetate = 10/1 to 1/1): white solid. <sup>1</sup>H NMR (400 MHz, CDCl<sub>3</sub>) δ 7.90-7.74 (m, 3 H, Ar-H), 7.70-7.61 (m, 1 H, Ar-H), 7.56-7.41 (m, 2 H, Ar-H), 7.40-7.32 (m, 1 H, Ar-H), 3.13 (t, *J* = 7.8 Hz, 2 H, CH<sub>2</sub>), 2.79 (t, *J* = 7.6 Hz, 2 H, CH<sub>2</sub>). <sup>13</sup>C NMR (101 MHz, CDCl<sub>3</sub>) 178.5, 137.6, 133.5, 132.2, 128.2, 127.6, 127.5, 126.9, 126.4, 126.1, 125.4, 35.4, 30.7. IR ν (neat, cm<sup>-1</sup>) 2928, 1711. The <sup>1</sup>H NMR spectra are matching with the known literature.<sup>19</sup>

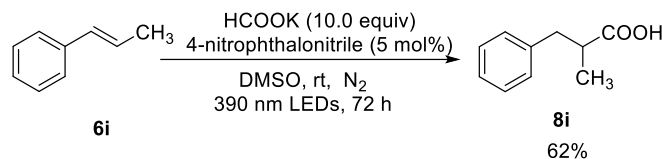

Following Typical Procedure 4, the reaction of **6i** (23.6 mg, 0.2 mmol), HCOOK (168.2 mg, 2.0 mmol), and 4-nitrophthalonitrile (1.9 mg, 0.02 mmol) in DMSO (2.0 mL) afforded **8i** (20.3 mg, 62%) (eluent: petroleum ether/ethyl acetate = 10/1 to 1/1): oil. <sup>1</sup>H NMR (400 MHz, CDCl<sub>3</sub>) δ 7.35-7.27 (m, 2 H, Ar-H), 7.25-7.17 (m, 3 H, Ar-H), 3.12-3.04 (m, 1 H, CH), 2.84-2.64 (m, 2 H, CH<sub>2</sub>), 1.18 (d, *J* = 7.2 Hz, 3 H, CH<sub>3</sub>). <sup>13</sup>C NMR (101 MHz, CDCl<sub>3</sub>) 182.3, 139.0, 129.0, 128.4, 126.4, 41.2, 39.3, 16.5. IR ν (neat, cm<sup>-1</sup>) 2928, 1708. The <sup>1</sup>H NMR spectra are matching with the known literature.<sup>18</sup>

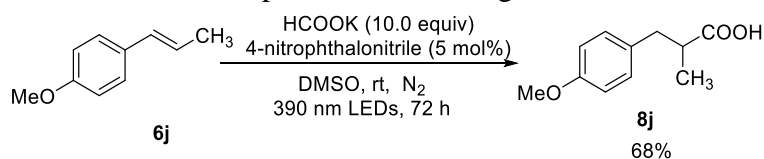

Following Typical Procedure 4, the reaction of **6j** (29.5 mg, 0.2 mmol), HCOOK (168.5 mg, 2.0 mmol), and 4-nitrophthalonitrile (1.6 mg, 0.02 mmol) in DMSO (2.0 mL) afforded **8j** (26.3 mg, 68%) (eluent: petroleum ether/ethyl acetate = 10/1 to 1/1): oil. <sup>1</sup>H NMR (400 MHz, CDCl<sub>3</sub>) δ 7.10 (d, *J* = 8.4 Hz, 2 H, Ar-H), 6.83 (d, *J* = 8.8 Hz, 2 H, Ar-H), 3.79 (s, 3 H, CH<sub>3</sub>), 3.06-2.96 (m, 1 H, CH), 2.78-2.57 (m, 2 H, CH<sub>2</sub>), 1.17 (d, *J* = 6.8 Hz, 3 H, CH<sub>2</sub>). <sup>13</sup>C NMR (101 MHz, CDCl<sub>3</sub>) 182.3, 139.0, 129.0, 128.4, 126.4, 41.2, 39.3, 16.5. IR ν (neat, cm<sup>-1</sup>) 2936, 1707. The <sup>1</sup>H NMR spectra are matching with the known literature.<sup>20</sup>

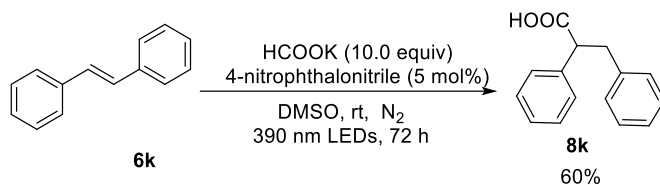

Following Typical Procedure 4, the reaction of **6k** (36.1 mg, 0.2 mmol), HCOOK (167.8 mg, 2.0 mmol), and 4-nitrophthalonitrile (1.7 mg, 0.02 mmol) in DMSO (2.0 mL) afforded **8k** (27.3 mg, 60%) (eluent: petroleum ether/ethyl acetate = 10/1 to 1/1): white solid.  $^1\text{H NMR}$  (400 MHz,  $\text{CDCl}_3$ )  $\delta$  7.35-7.27 (m, 5 H, Ar-H), 7.25-7.09 (m, 5 H, Ar-H), 3.86 (t,  $J = 7.6$  Hz, 1 H, CH), 3.48-3.35 (m, 1 H, CH), 3.09-2.96 (m, 1 H, CH).  $^{13}\text{C NMR}$  (101 MHz,  $\text{CDCl}_3$ ) 179.6, 138.6, 137.9, 128.9, 128.7, 128.3, 128.1, 127.6, 126.4, 53.4, 39.2. IR  $\nu$  (neat,  $\text{cm}^{-1}$ ) 2921, 1708. The  $^1\text{H NMR}$  spectra are matching with the known literature.<sup>20</sup>

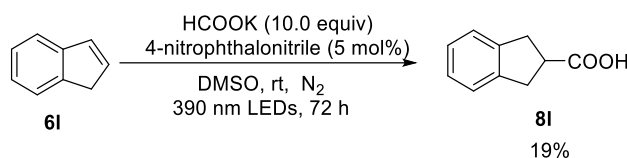

Following Typical Procedure 4, the reaction of **6l** (23.0 mg, 0.2 mmol), HCOOK (168.2 mg, 2.0 mmol), and 4-nitrophthalonitrile (1.9 mg, 0.02 mmol) in DMSO (2.0 mL) afforded **8l** (6.2 mg, 19%) (eluent: petroleum ether/ethyl acetate = 10/1 to 1/1): white solid.  $^1\text{H NMR}$  (400 MHz,  $\text{CDCl}_3$ )  $\delta$  7.25-7.13 (m, 4 H, Ar-H), 3.45-3.19 (m, 5 H,  $\text{CH}_2 \times 2$  and CH).  $^{13}\text{C NMR}$  (101 MHz,  $\text{CDCl}_3$ ) 180.8, 141.3, 126.7, 124.3, 43.2, 36.0. IR  $\nu$  (neat,  $\text{cm}^{-1}$ ) 2924, 1707. The  $^1\text{H NMR}$  spectra are matching with the known literature.<sup>21</sup>

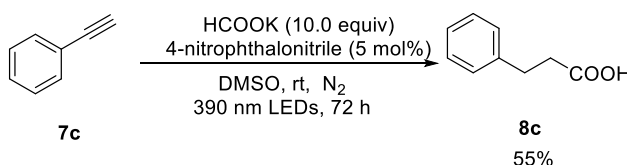

Following Typical Procedure 4, the reaction of **7c** (20.8 mg, 0.2 mmol), HCOOK (168.3 mg, 2.0 mmol), and 4-nitrophthalonitrile (1.8 mg, 0.02 mmol) in DMSO (2.0 mL) afforded **8c** (16.9 mg, 55%) (eluent: petroleum ether/ethyl acetate = 10/1 to 1/1): oil.  $^1\text{H NMR}$  (400 MHz,  $\text{CDCl}_3$ )  $\delta$  7.35-7.29 (m, 2 H, Ar-H), 7.27-7.20 (m, 2 H, Ar-H), 2.98 (t,  $J = 7.8$  Hz, 2 H,  $\text{CH}_2$ ), 2.77-2.64 (m, 2 H,  $\text{CH}_2$ ). 179.4, 140.1, 128.5, 128.2, 126.4, 35.6, 30.5. IR  $\nu$  (neat,  $\text{cm}^{-1}$ ) 3026, 1707. The  $^1\text{H NMR}$  spectra are matching with the known literature.<sup>18</sup>

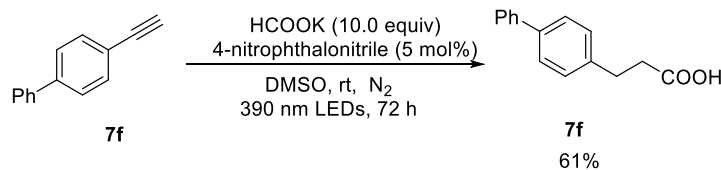

Following Typical Procedure 4, the reaction of **7f** (35.5 mg, 0.2 mmol), HCOOK (168.2 mg, 2.0 mmol), and 4-nitrophthalonitrile (1.8 mg, 0.02 mmol) in DMSO (2.0 mL) afforded **8f** (27.7 mg, 61%) (eluent: petroleum ether/ethyl acetate = 10/1 to 1/1): white

solid.  $^1\text{H}$  NMR (400 MHz,  $\text{CDCl}_3$ )  $\delta$  7.62-7.50 (m, 4 H, Ar-H), 7.48-7.40 (m, 2 H, Ar-H), 7.36-7.28 (m, 3 H, Ar-H), 3.01 (t,  $J = 7.8$  Hz, 2 H,  $\text{CH}_2$ ), 2.73 (t,  $J = 7.8$  Hz, 2 H,  $\text{CH}_2$ ).  $^{13}\text{C}$  NMR (101 MHz,  $\text{CDCl}_3$ ) 178.6, 140.8, 139.3, 139.2, 128.7, 128.7, 127.3, 127.1, 127.0, 35.4, 30.1. IR  $\nu$  (neat,  $\text{cm}^{-1}$ ) 3028, 1701. The  $^1\text{H}$  NMR spectra are matching with the known literature.<sup>18</sup>

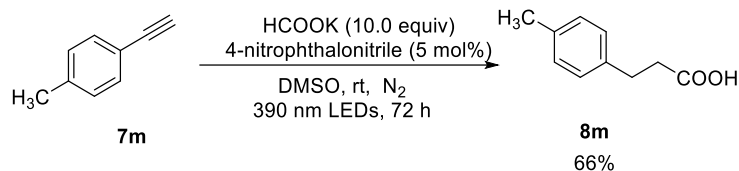

Following Typical Procedure 4, the reaction of **7m** (23.0 mg, 0.2 mmol), HCOOK (168.2 mg, 2.0 mmol), and 4-nitrophthalonitrile (1.8 mg, 0.02 mmol) in DMSO (2.0 mL) afforded **8m** (21.3 mg, 66%) (eluent: petroleum ether/ethyl acetate = 10/1 to 1/1): white solid.  $^1\text{H}$  NMR (400 MHz,  $\text{CDCl}_3$ )  $\delta$  7.18-7.05 (m, 4 H, Ar-H), 2.93 (t,  $J = 7.8$  Hz, 2 H,  $\text{CH}_2$ ), 2.67 (t,  $J = 7.8$  Hz, 2 H,  $\text{CH}_2$ ).  $^{13}\text{C}$  NMR (101 MHz,  $\text{CDCl}_3$ ) 179.2, 137.0, 135.8, 129.2, 128.1, 35.7, 30.1, 21.0. IR  $\nu$  (neat,  $\text{cm}^{-1}$ ) 2929, 1717. The  $^1\text{H}$  NMR spectra are matching with the known literature.<sup>18</sup>

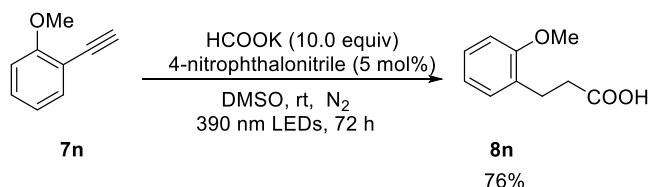

Following Typical Procedure 4, the reaction of **7n** (26.3 mg, 0.2 mmol), HCOOK (167.8 mg, 2.0 mmol), and 4-nitrophthalonitrile (1.8 mg, 0.02 mmol) in DMSO (2.0 mL) afforded **8n** (27.3 mg, 66%) (eluent: petroleum ether/ethyl acetate = 10/1 to 1/1): oil.  $^1\text{H}$  NMR (400 MHz,  $\text{CDCl}_3$ )  $\delta$  7.24-7.14 (m, 2 H, Ar-H), 6.91-6.83 (m, 2 H, Ar-H), 3.82 (s, 3 H,  $\text{CH}_3$ ), 2.95 (t,  $J = 7.8$  Hz, 2 H,  $\text{CH}_2$ ), 2.66 (t,  $J = 7.8$  Hz, 2 H,  $\text{CH}_2$ ).  $^{13}\text{C}$  NMR (101 MHz,  $\text{CDCl}_3$ ) 179.3, 157.4, 129.9, 128.4, 127.7, 120.4, 110.2, 55.1, 33.9, 25.9. IR  $\nu$  (neat,  $\text{cm}^{-1}$ ) 2934, 1717. The  $^1\text{H}$  NMR spectra are matching with the known literature.<sup>22</sup>

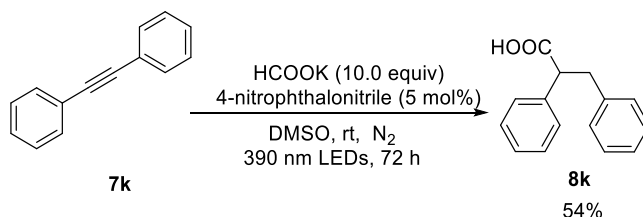

Following Typical Procedure 4, the reaction of **7k** (35.9 mg, 0.2 mmol), HCOOK (168.2 mg, 2.0 mmol), and 4-nitrophthalonitrile (1.6 mg, 0.02 mmol) in DMSO (2.0 mL) afforded **8k** (24.5 mg, 66%) (eluent: petroleum ether/ethyl acetate = 10/1 to 1/1): white solid. mp. 120.1-120.8  $^\circ\text{C}$ .  $^1\text{H}$  NMR (400 MHz,  $\text{CDCl}_3$ )  $\delta$  7.36-7.10 (m, 10 H, Ar-H), 3.94-3.82 (m, 1 H, CH), 3.49-3.37 (m, 1 H, CH), 3.13-3.02 (m, 1 H, CH).  $^{13}\text{C}$  NMR (101 MHz,  $\text{CDCl}_3$ ) 179.3, 138.6, 137.9, 128.9, 128.7, 128.3, 128.1, 127.6, 126.4,

53.4, 39.2. IR  $\nu$  (neat,  $\text{cm}^{-1}$ ) 3028, 1704. The  $^1\text{H}$  NMR spectra are matching with the known literature.<sup>20</sup>

## Mechanistic studies for the formate activation

### 1. The radical-captured experiment

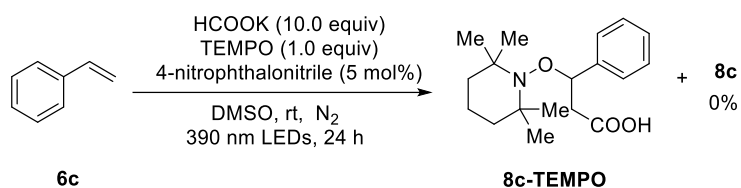

The reaction of **6c**, HCOOK with TEMPO in DMSO under N<sub>2</sub> would produce the radical captured product **8c-TEMPO**, which could be detected by high resolution mass spectroscopy. HRMS (ESI) m/z: [M]<sup>+</sup> Calcd for C<sub>18</sub>H<sub>17</sub>NO<sub>3</sub> 305.1986; found 305.1991.

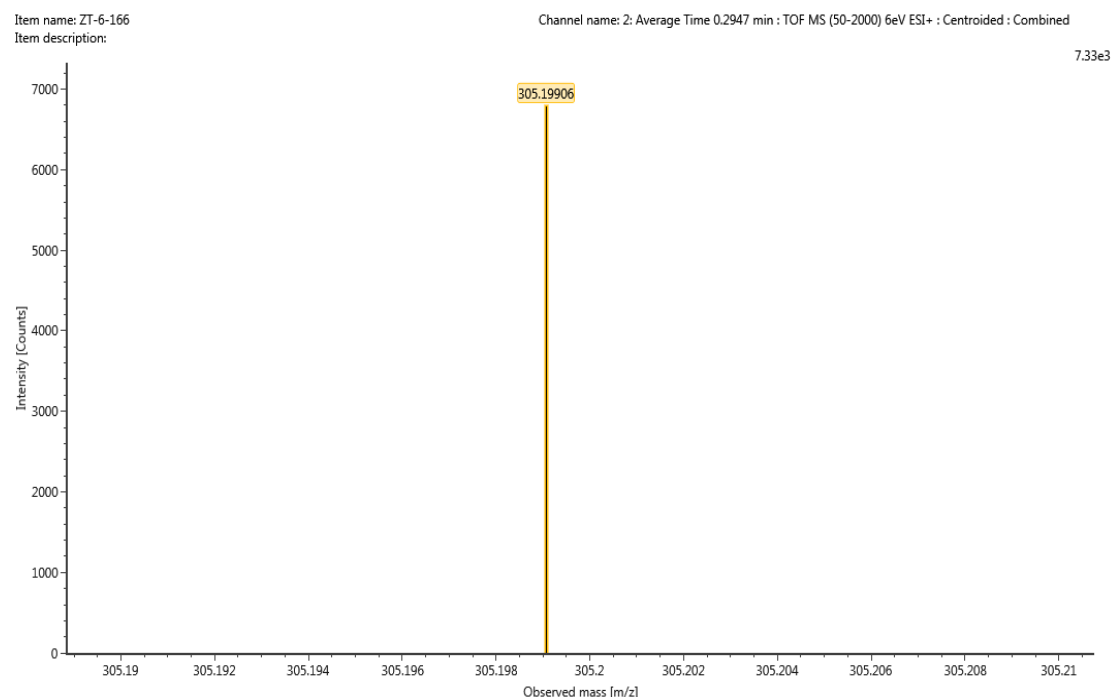

**Supplementary Figure 16: The HRMS spectrum of 8c-TEMPO.** HRMS (ESI) m/z: [M]<sup>+</sup> Calcd for C<sub>18</sub>H<sub>17</sub>NO<sub>3</sub> 305.1986; found 305.1991.

### 2. The optical absorption spectra of mixture of HCOOK and 4-nitrophthalonitrile.

The UV-Vis absorption of HCOOK and 4-nitrophthalonitrile was showed below. The sum of the concentrations of A and B was 0.01 M in DMSO.



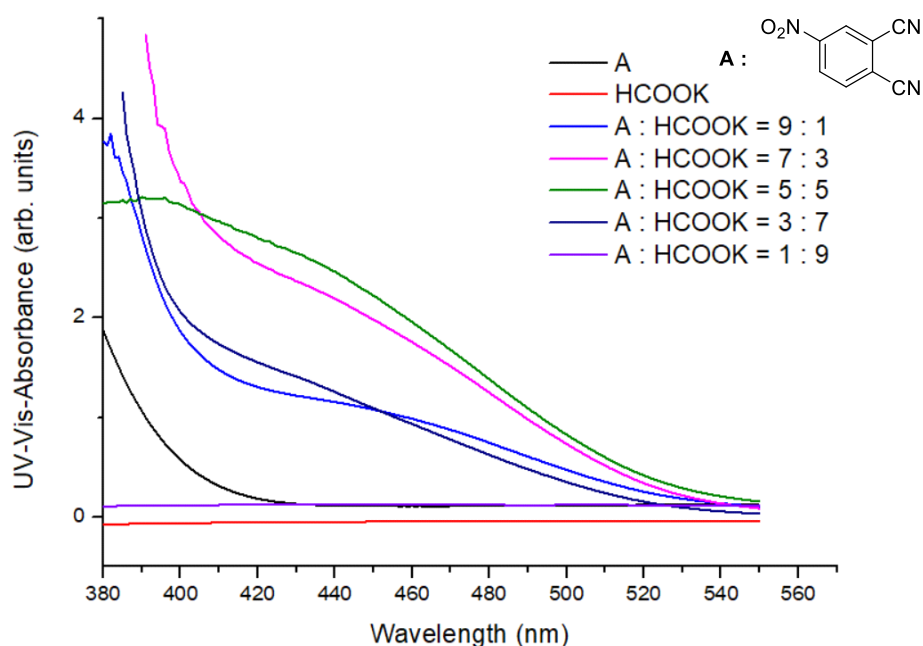

**Supplementary Figure 17: The UV-Vis absorption spectra.** The UV-Vis absorption of mixture of HCOOK and 4-nitrothalonitrile in DMSO.

Conclusion: UV-Vis spectrum of the mixture of HCOOK and 4-nitrothalonitrile with a ratio of 1:1 shows a strongest bathochromic shift, which support the formation of ion pair of HCOOK and 4-nitrothalonitrile in the reaction mixture.

3.  $^1\text{H}$  NMR shift of 4-nitrothalonitrile with the addition of HCOOK in DMSO.

The  $^1\text{H}$  NMR of the mixture HCOOK (0.05 M, 0.1 M and 0.2 M) and 4-nitrothalonitrile (0.1 M) in DMSO was showed below.

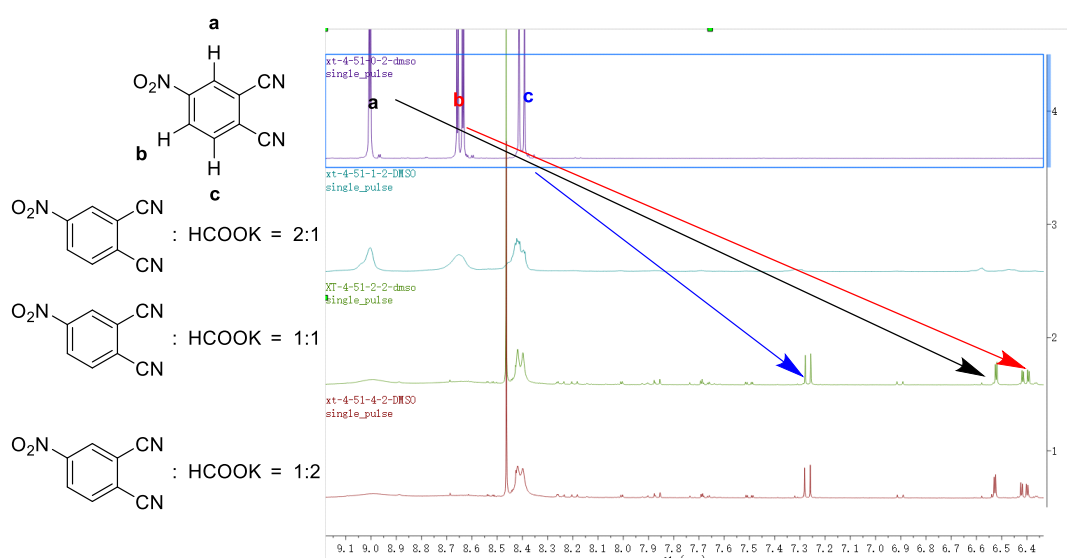

**Supplementary Figure 18: Proton NMRs.**  $^1\text{H}$  NMR shift of EDA complex.

Conclusion: A clear upfield-shift of the  $^1\text{H}$  NMR signal was observed with the addition

of HCOOK into 4-nitrophthalonitrile, which indicated the interaction of HCOOK and 4-nitrophthalonitrile.

### Mechanism of reductive hydrocarboxylation of alkynes

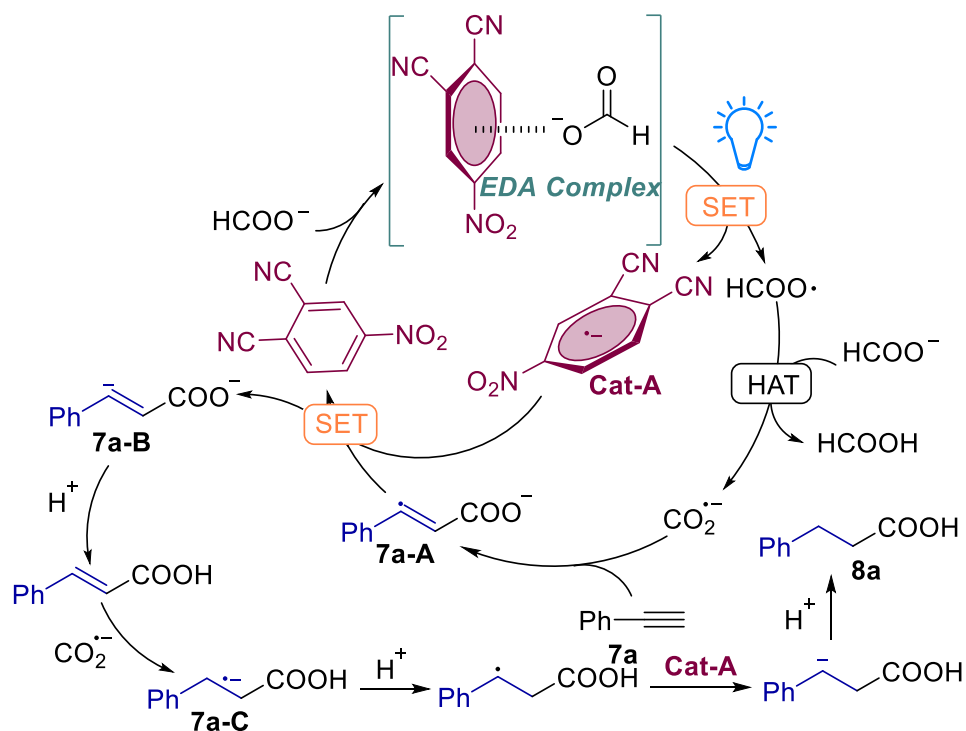

**Supplementary Figure 19: Mechanism of reductive hydrocarboxylation of alkynes.** The catalytic cycle includes EDA complex formation, photoinduced single electron transfer (SET), deprotonation, radical addition, and protonation.

## Synthetic Potentials

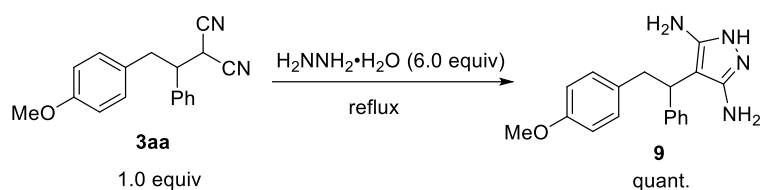

To a 10 mL vial were added **3aa** (110.8 mg, 0.4 mmol), and hydrazine hydrate (120.6 mg, 2.4 mmol) in air. The resulting mixture was heated under reflux for 1.5 hours and cooled to room temperature, then water was added. The insoluble compound was dissolved in ethyl acetate and dried over anhydrous  $\text{Na}_2\text{SO}_4$ . Evaporation afforded compound **9** (122.3 mg, quant.): brown oil.  $^1\text{H}$  NMR (400 MHz,  $\text{CDCl}_3$ )  $\delta$  7.45-7.04 (m, 5 H, Ar-H), 7.00-6.85 (m, 2 H, Ar-H), 6.81-6.66 (m, 2 H, Ar-H), 3.94-3.83 (m, 1 H, CH), 3.77-3.62 (m, 3 H,  $\text{CH}_3$ ), 3.35-3.23 (m, 1 H,  $\text{CH}_2$ ), 3.11-2.91 (m, 1 H,  $\text{CH}_2$ ).  $^{13}\text{C}$  NMR (101 MHz,  $\text{CDCl}_3$ )  $\delta$  157.9, 148.9, 143.2, 132.7, 130.1, 128.5, 127.6, 126.3, 113.7, 92.8, 55.1, 41.7, 38.3. IR  $\nu$  (neat,  $\text{cm}^{-1}$ ) 3331. HRMS (ESI)  $m/z$ :  $[\text{M} + \text{Na}]^+$  Calcd for  $\text{C}_{18}\text{H}_{20}\text{N}_4\text{ONa}$  331.1529; found 331.1518.

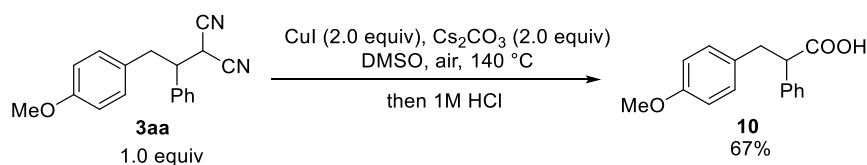

To a 10 mL vial were added **3aa** (110.6 mg, 0.4 mmol),  $\text{CuI}$  (15.0 mg, 0.08 mmol), and  $\text{Cs}_2\text{CO}_3$  (260.9 mg, 0.8 mmol) in  $\text{DMSO}$  (2.0 mL) in air. The resulting mixture was stirred at  $140\text{ }^\circ\text{C}$  in a shot bath (metal pellets) for 24 hours. After cooling to room temperature,  $\text{HCl}$  (1M) was added until pH reached 2~3, then the solution was extracted with ethyl acetate ( $10\text{ mL} \times 3$ ), the combined organic layer was evaporation and flash chromatography on silica gel afforded **10** (68.4 mg, 67%) (eluent: petroleum ether/ethyl acetate = 20/1 to 10/1): colorless oil.  $^1\text{H}$  NMR (400 MHz,  $\text{CDCl}_3$ )  $\delta$  7.35-7.26 (m, 5 H, Ar-H), 7.02 (d,  $J = 8.4\text{ Hz}$ , 2 H, Ar-H), 6.76 (d,  $J = 8.4\text{ Hz}$ , 2 H, Ar-H), 3.89-3.74 (m, 4 H,  $\text{CH}_3$  and CH), 3.40-3.29 (m, 1 H,  $\text{CH}_2$ ), 3.02-2.93 (m, 1 H,  $\text{CH}_2$ ).  $^{13}\text{C}$  NMR (151 MHz,  $\text{CDCl}_3$ )  $\delta$  158.1, 138.0, 130.7, 129.9, 128.7, 128.1, 127.7, 113.7, 55.2, 53.5, 38.5. IR  $\nu$  (neat,  $\text{cm}^{-1}$ ) 1697. The  $^1\text{H}$  NMR spectra are matching with the known literature.<sup>23</sup>

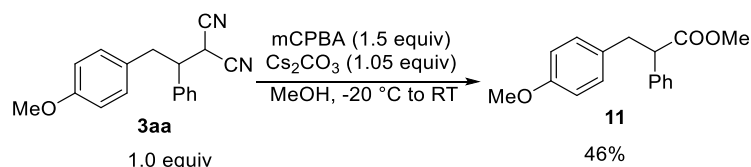

To an oven-dried 10 mL Schleck tube were added **3aa** (110.8 mg, 0.4 mmol),  $m\text{CPBA}$  (103.6 mg, 0.6 mmol), and  $\text{Cs}_2\text{CO}_3$  (136.6 mg, 0.42 mmol) in  $\text{MeOH}$  (2.0 mL) in nitrogen. The resulting mixture was stirred at  $-20\text{ }^\circ\text{C}$  for 5 hours, the reaction was warmed to room temperature and stirred for another 19 hours. The mixture was filtered through a short column of  $\text{SiO}_2$ , evaporation and flash chromatography on silica gel afforded **11** (50.1 mg, 46%) (eluent: petroleum ether/ethyl acetate = 50/1): colorless oil.

$^1\text{H}$  NMR (400 MHz,  $\text{CDCl}_3$ )  $\delta$  7.40-7.22 (m, 5 H, Ar-H), 7.06 (d,  $J = 8.4$  Hz, 2 H, Ar-H), 6.80 (d,  $J = 8.4$  Hz, 2 H, Ar-H), 3.88-3.81 (m, 1 H, CH), 3.78 (s, 3 H,  $\text{CH}_3$ ), 3.62 (s, 3 H,  $\text{CH}_3$ ), 3.47-3.32 (m, 1 H,  $\text{CH}_2$ ), 3.04-2.95 (m, 1 H,  $\text{CH}_2$ ).  $^{13}\text{C}$  NMR (101 MHz,  $\text{CDCl}_3$ )  $\delta$  173.8, 158.0, 138.6, 131.0, 129.8, 128.6, 127.9, 127.3, 113.6, 55.1, 53.8, 51.9, 38.9. IR  $\nu$  (neat,  $\text{cm}^{-1}$ ) 3029, 1731. The  $^1\text{H}$  NMR spectra are matching with the known literature.<sup>24</sup>

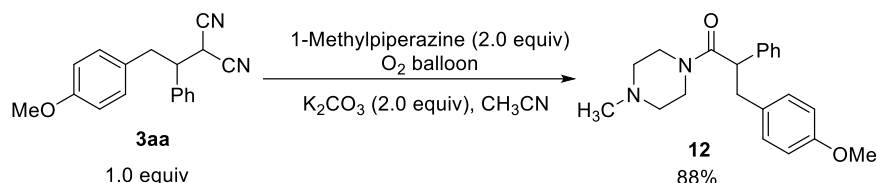

To a 10 mL vial were added **3aa** (110.2 mg, 0.4 mmol),  $\text{K}_2\text{CO}_3$  (110.5 mg, 0.8 mmol), and 1-methylpiperazine (89  $\mu\text{L}$ ,  $d = 0.903$  g/ml, 80.4 mg, 0.8 mmol) in oxygen. The resulting mixture was stirred under oxygen atmosphere for 24 hours, the solution was filtered, the filtrate evaporation and flash chromatography on silica gel afforded **12** (118.8 mg, 88%) (eluent: petroleum ether/ethyl acetate = 1/1 to petroleum ether/ethyl acetate/MeOH = 1/1/1): colorless oil.  $^1\text{H}$  NMR (400 MHz,  $\text{CDCl}_3$ )  $\delta$  7.33-7.11 (m, 5 H, Ar-H), 6.97 (d,  $J = 8.8$  Hz, 2 H, Ar-H), 6.73 (d,  $J = 8.4$  Hz, 2 H, Ar-H), 3.90 (t,  $J = 7.2$  Hz, 1 H, CH), 3.77-3.62 (m, 4 H,  $\text{CH}_2$  and  $\text{CH}_3$ ), 3.53-3.44 (m, 1 H,  $\text{CH}_2$ ), 3.44-3.35 (m, 1 H,  $\text{CH}_2$ ), 3.35-3.26 (m, 2 H,  $\text{CH}_2$ ), 2.29-2.20 (m, 1 H,  $\text{CH}_2$ ), 2.19-2.07 (m, 4 H,  $\text{CH}_2$  and  $\text{CH}_3$ ), 2.03-1.91 (m, 1 H,  $\text{CH}_2$ ), 1.81-1.68 (m, 1 H,  $\text{CH}_2$ ).  $^{13}\text{C}$  NMR (101 MHz,  $\text{CDCl}_3$ )  $\delta$  170.8, 157.7, 139.5, 131.7, 129.9, 128.4, 127.7, 126.7, 113.3, 54.9, 54.3, 54.3, 50.8, 45.6, 45.2, 41.7, 39.9. IR  $\nu$  (neat,  $\text{cm}^{-1}$ ) 3026, 1651. HRMS (ESI)  $m/z$ :  $[\text{M} + \text{H}]^+$  Calcd for  $\text{C}_{21}\text{H}_{27}\text{N}_2\text{O}_2$  339.2067; found 339.2078.

## Spectra

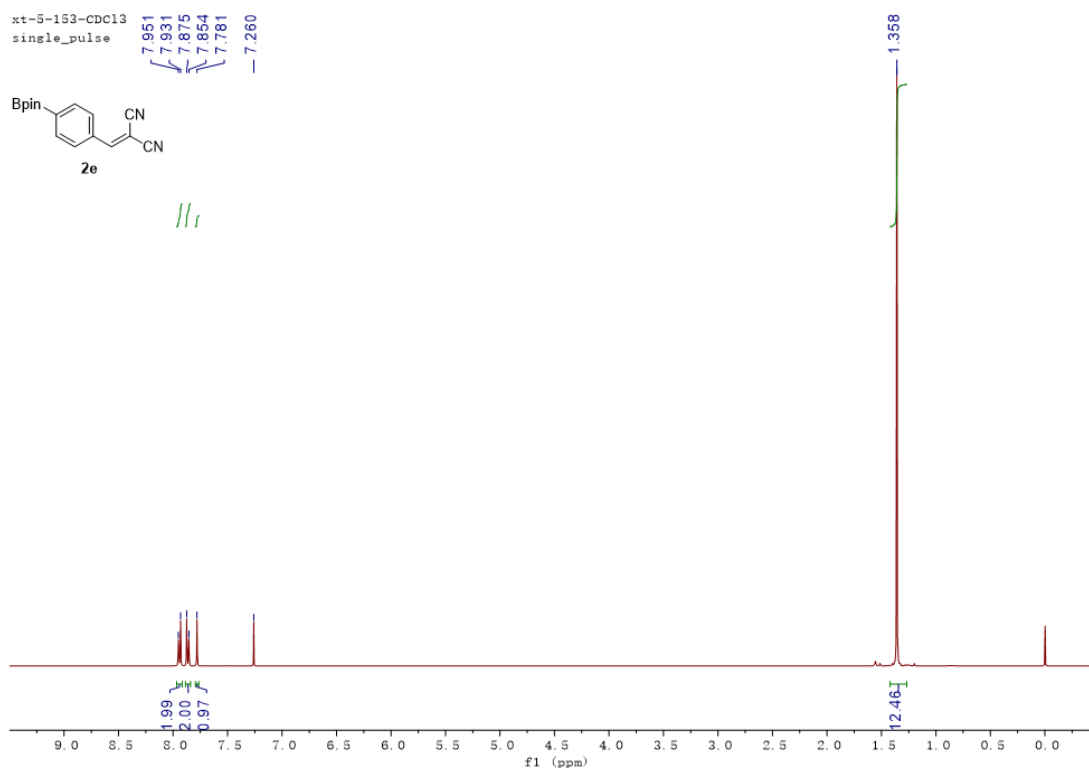

<sup>1</sup>H NMR (400 MHz, CDCl<sub>3</sub>) of **2e**

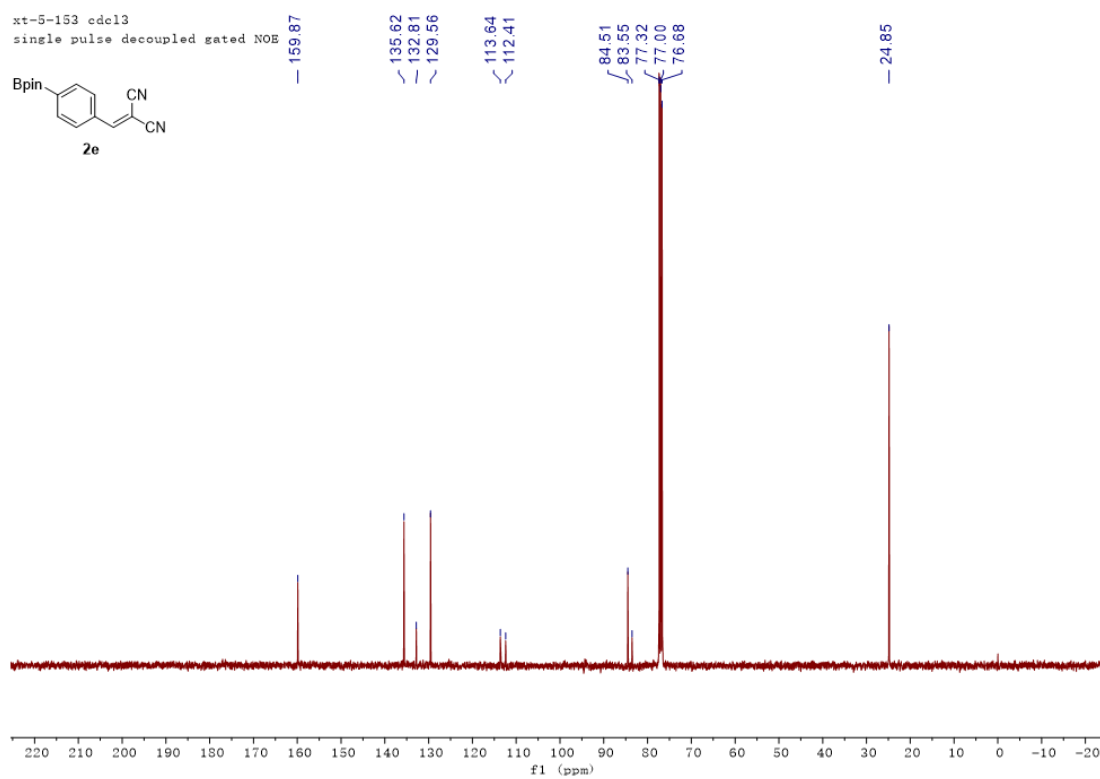

<sup>13</sup>C NMR (101 MHz, CDCl<sub>3</sub>) of **2e**

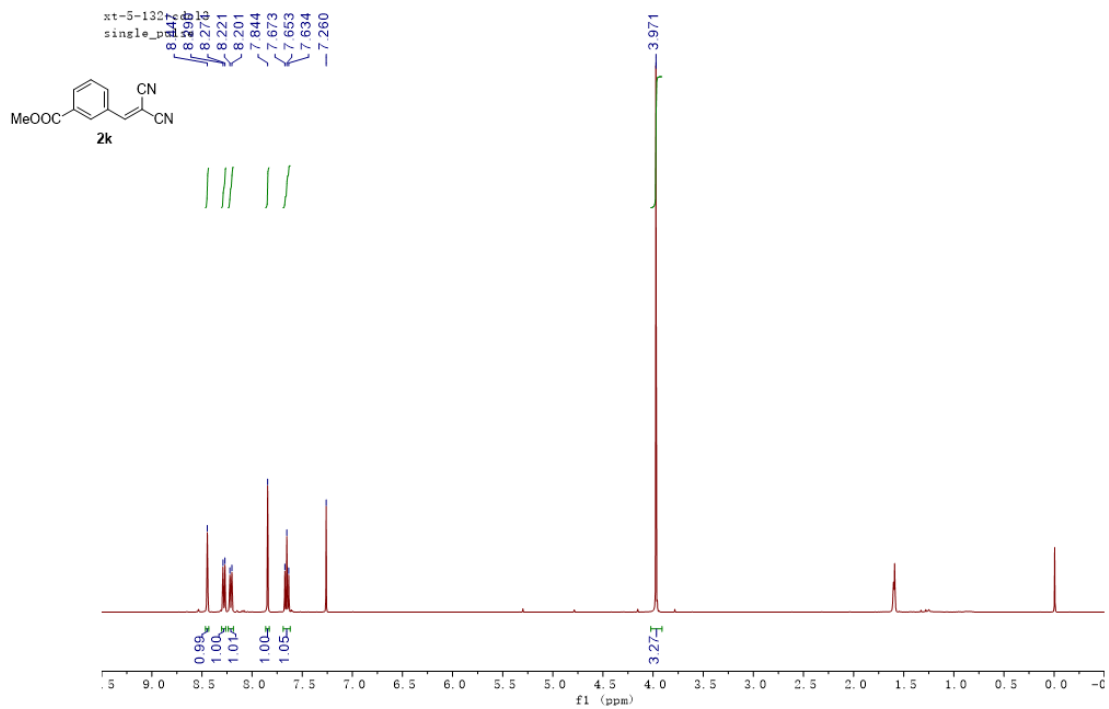

<sup>1</sup>H NMR (400 MHz, CDCl<sub>3</sub>) of **2k**

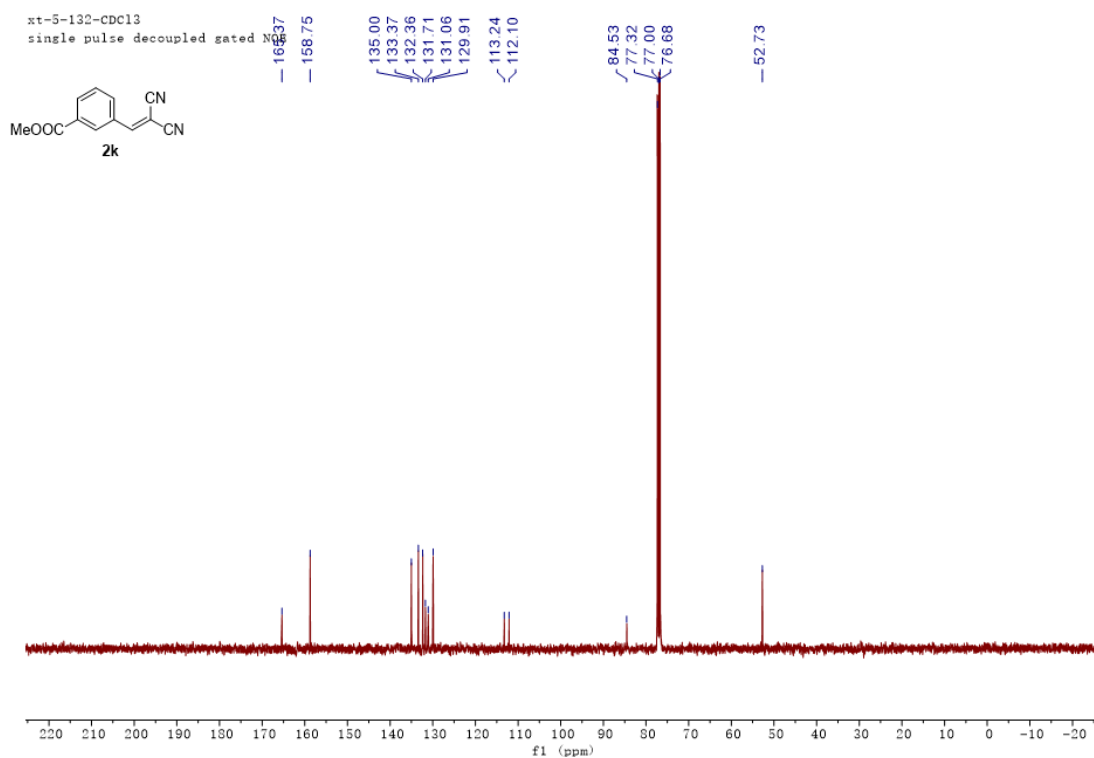

<sup>13</sup>C NMR (101 MHz, CDCl<sub>3</sub>) of **2k**

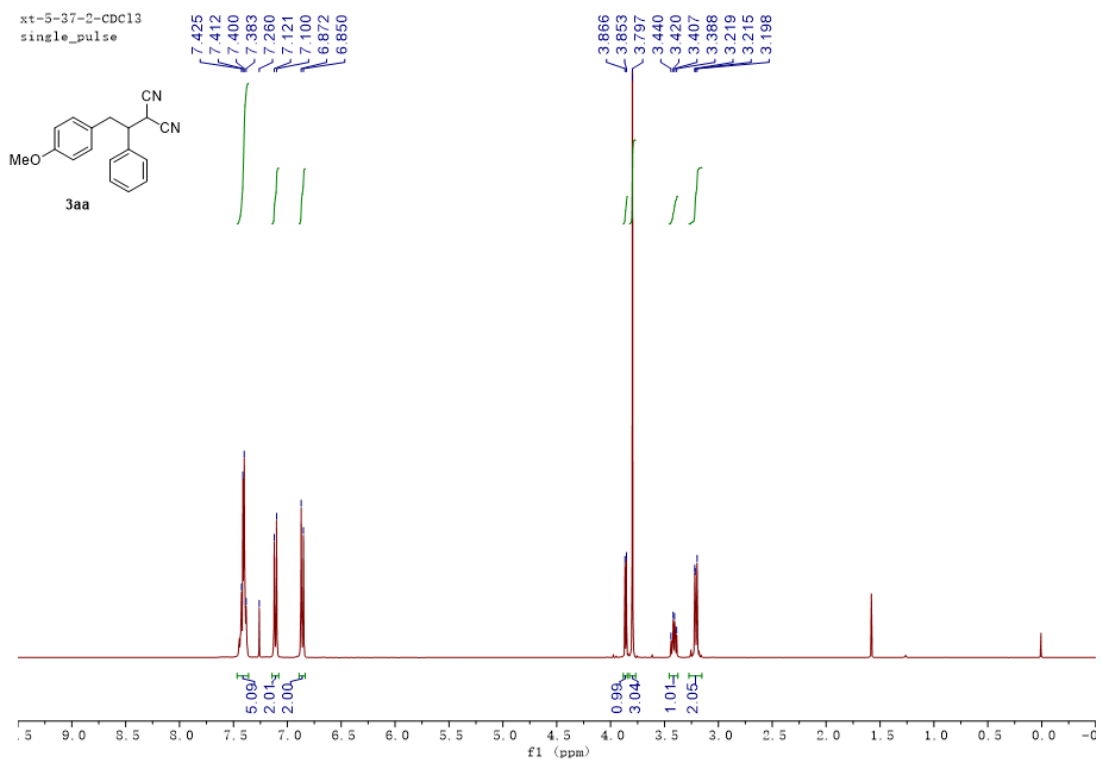

<sup>1</sup>H NMR (400 MHz, CDCl<sub>3</sub>) of **3aa**

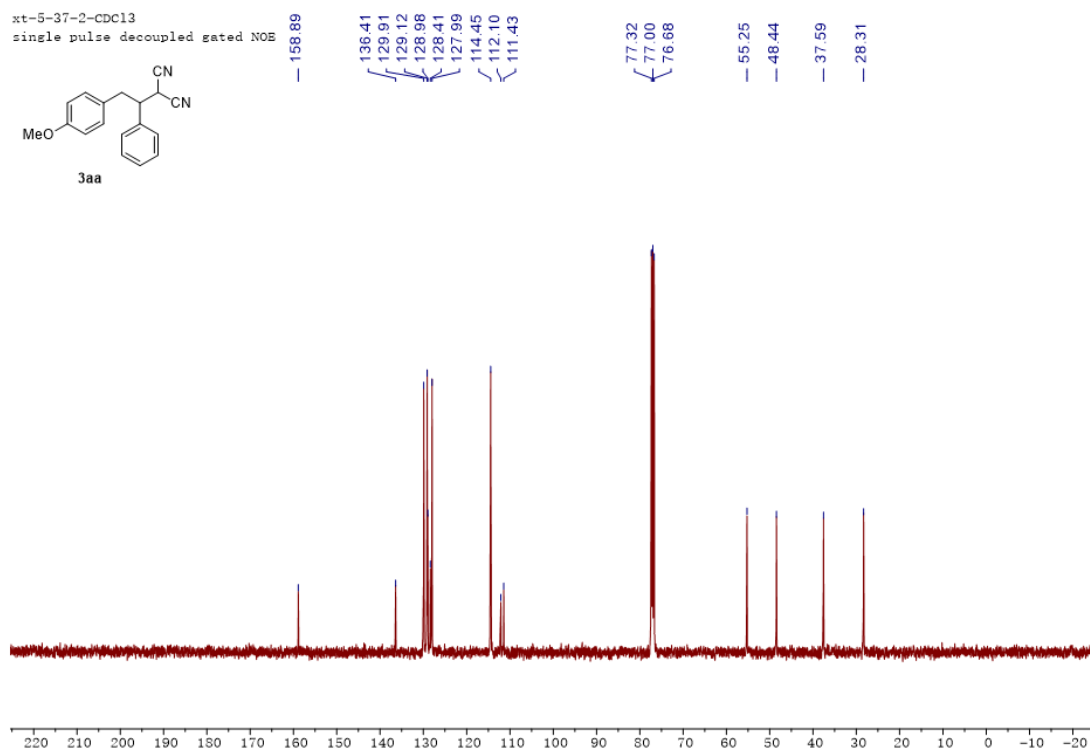

<sup>13</sup>C NMR (101 MHz, CDCl<sub>3</sub>) of **3aa**

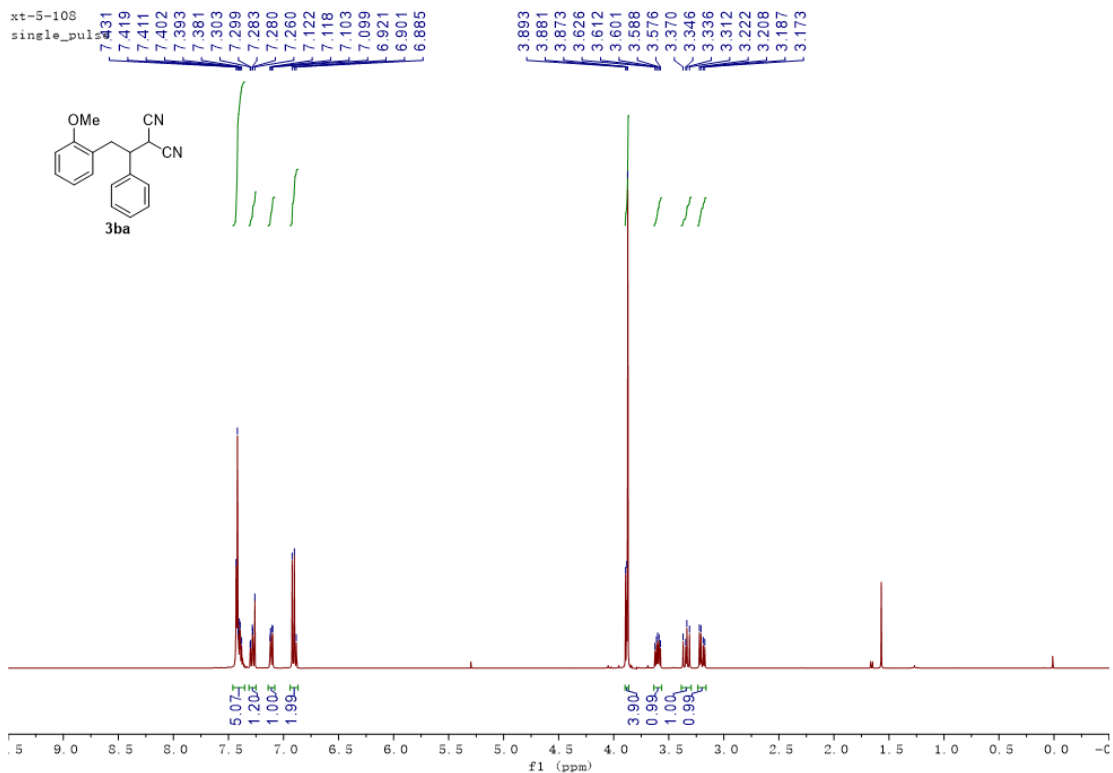

<sup>1</sup>H NMR (400 MHz, CDCl<sub>3</sub>) of **3ba**

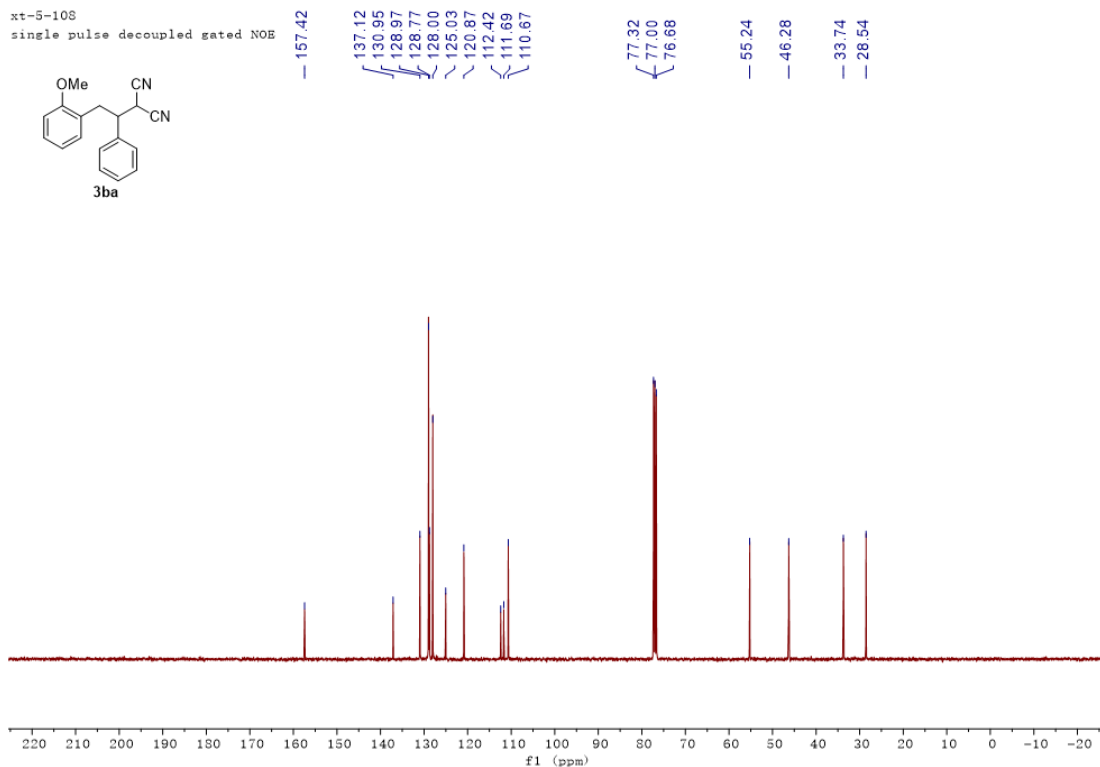

<sup>13</sup>C NMR (101 MHz, CDCl<sub>3</sub>) of **3aa**



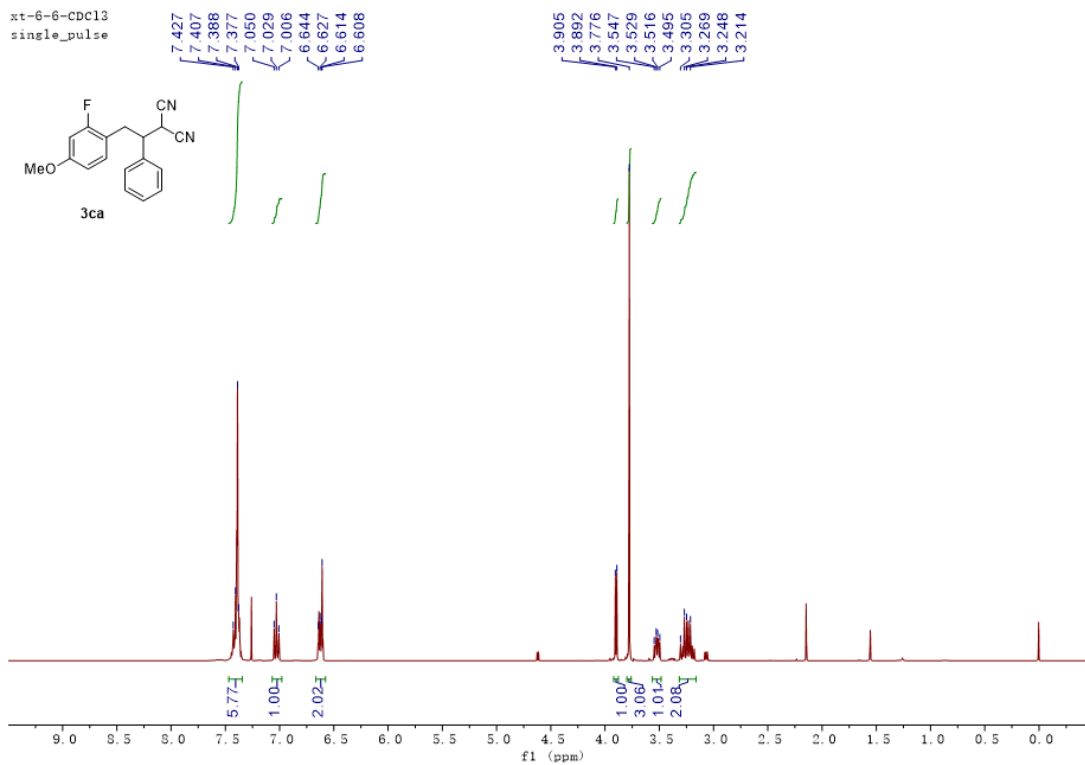

<sup>1</sup>H NMR (400 MHz, CDCl<sub>3</sub>) of **3ca**

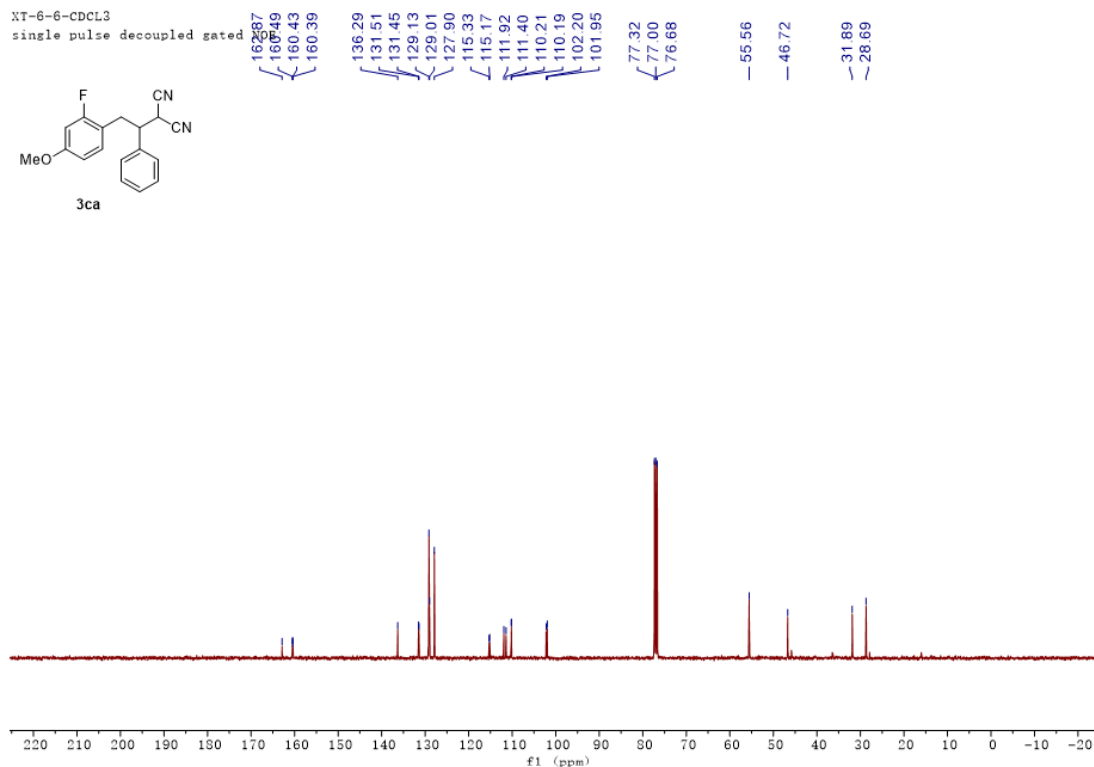

<sup>13</sup>C NMR (101 MHz, CDCl<sub>3</sub>) of **3ca**

xt-6-6-19F-CDCl3  
single\_pulse

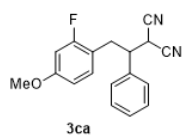

-115.36

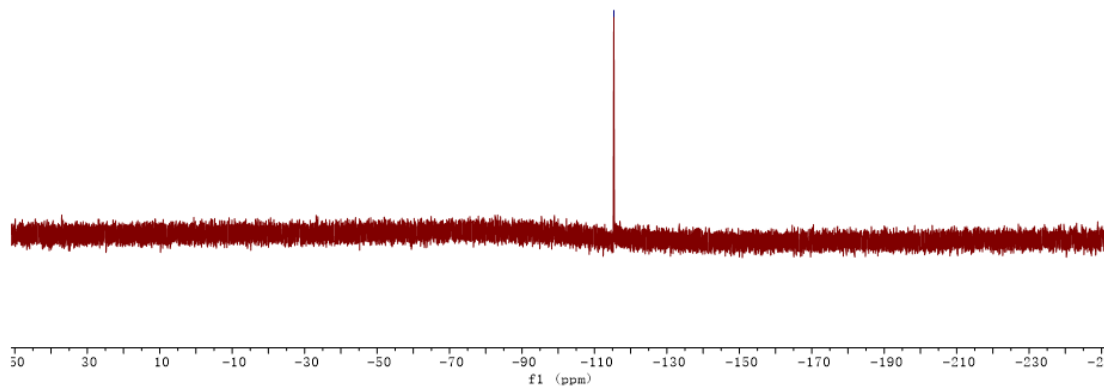

<sup>19</sup>F NMR (376 MHz, CDCl<sub>3</sub>) of **3ca**

xt-6-5  
single\_pulse

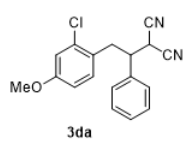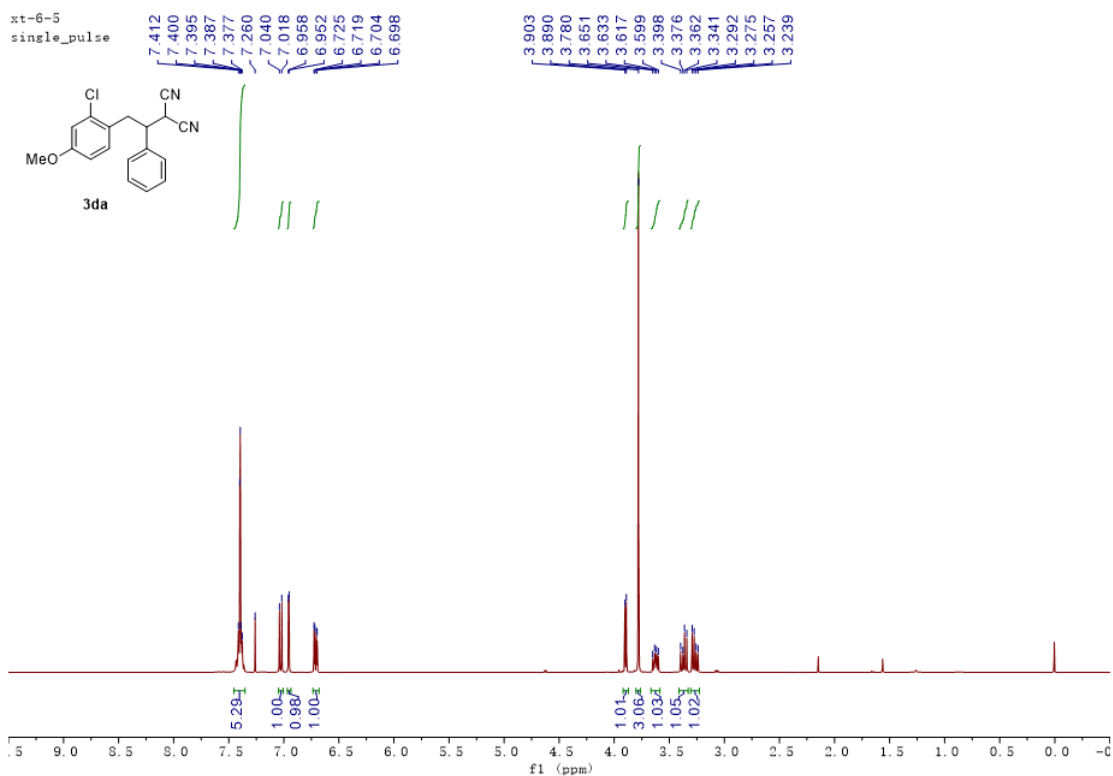

<sup>1</sup>H NMR (400 MHz, CDCl<sub>3</sub>) of **3da**

xt-6-5

single pulse decoupled gated NOB

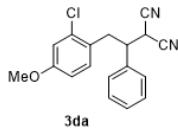

159.57  
136.38  
134.67  
131.77  
129.15  
129.00  
127.90  
126.08  
115.50  
113.16  
111.93  
111.53  
77.31  
77.00  
76.88  
55.51  
46.00  
35.98  
28.56

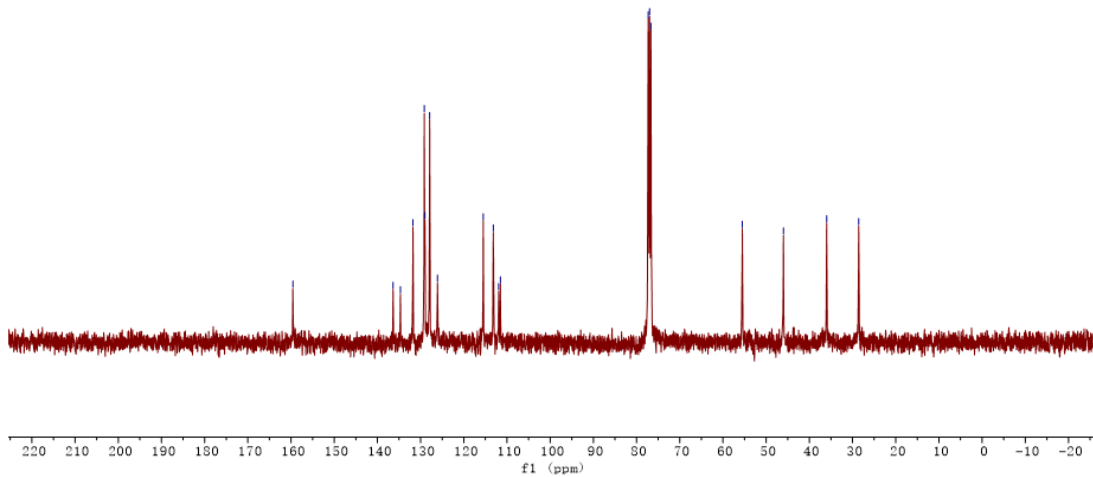

$^{13}\text{C}$  NMR (101 MHz,  $\text{CDCl}_3$ ) of **3da**

xt-5-111- $\text{CDCl}_3$   
single\_pulse

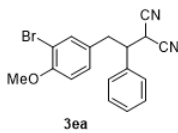

7.424  
7.405  
7.390  
7.367  
7.347  
7.280  
7.076  
7.071  
7.055  
7.050  
6.829  
6.808  
3.873  
3.864  
3.441  
3.421  
3.408  
3.388  
3.246  
3.210  
3.191  
3.175  
3.159

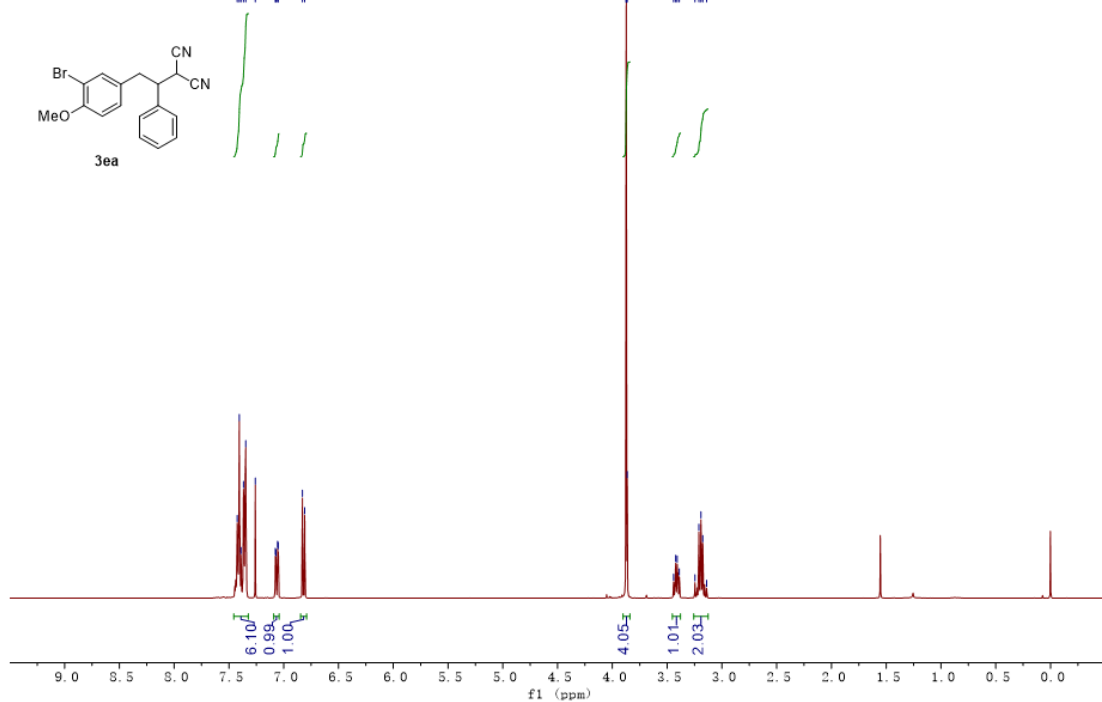

$^1\text{H}$  NMR (400 MHz,  $\text{CDCl}_3$ ) of **3ea**

XT-5-111-CDCl3  
single pulse decoupled gated NOE

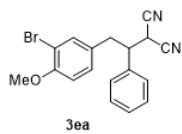

155.26  
136.02  
133.54  
129.95  
129.24  
129.14  
129.02  
127.94  
112.14  
111.86  
111.35  
77.32  
77.00  
76.68  
56.24  
48.25  
37.27  
28.55

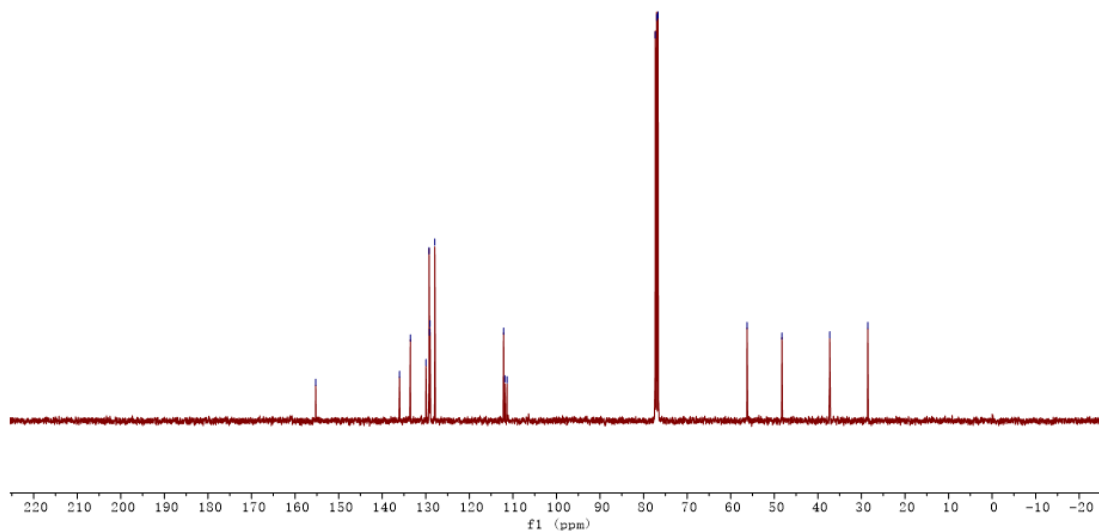

<sup>13</sup>C NMR (101 MHz, CDCl<sub>3</sub>) of **3ea**

xt-6-40-CDCl3  
single pulse gated

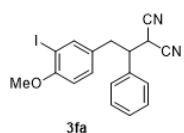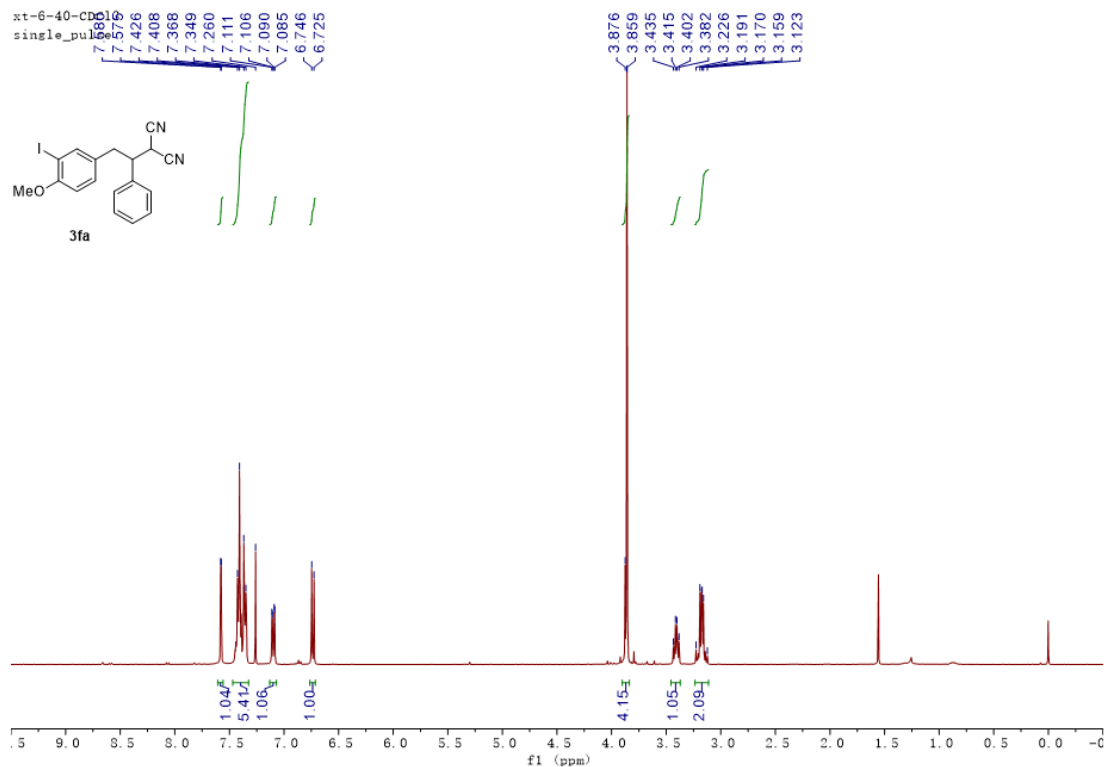

<sup>1</sup>H NMR (400 MHz, CDCl<sub>3</sub>) of **3fa**

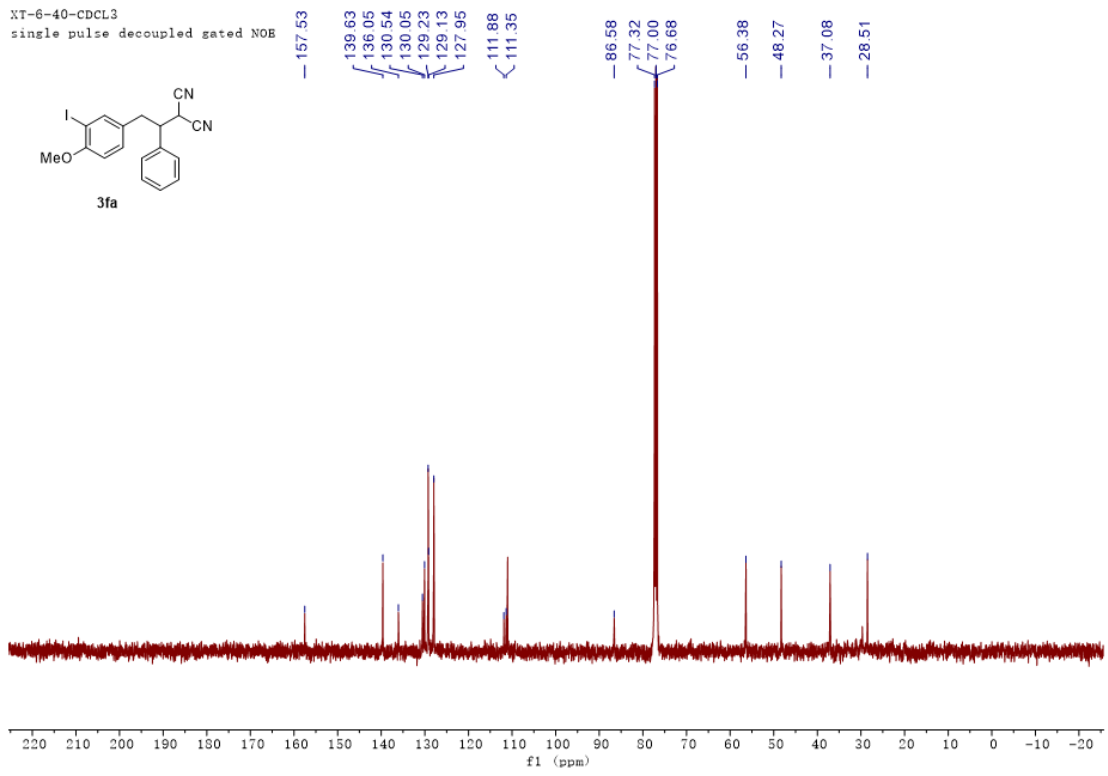

<sup>13</sup>C NMR (101 MHz, CDCl<sub>3</sub>) of 3fa

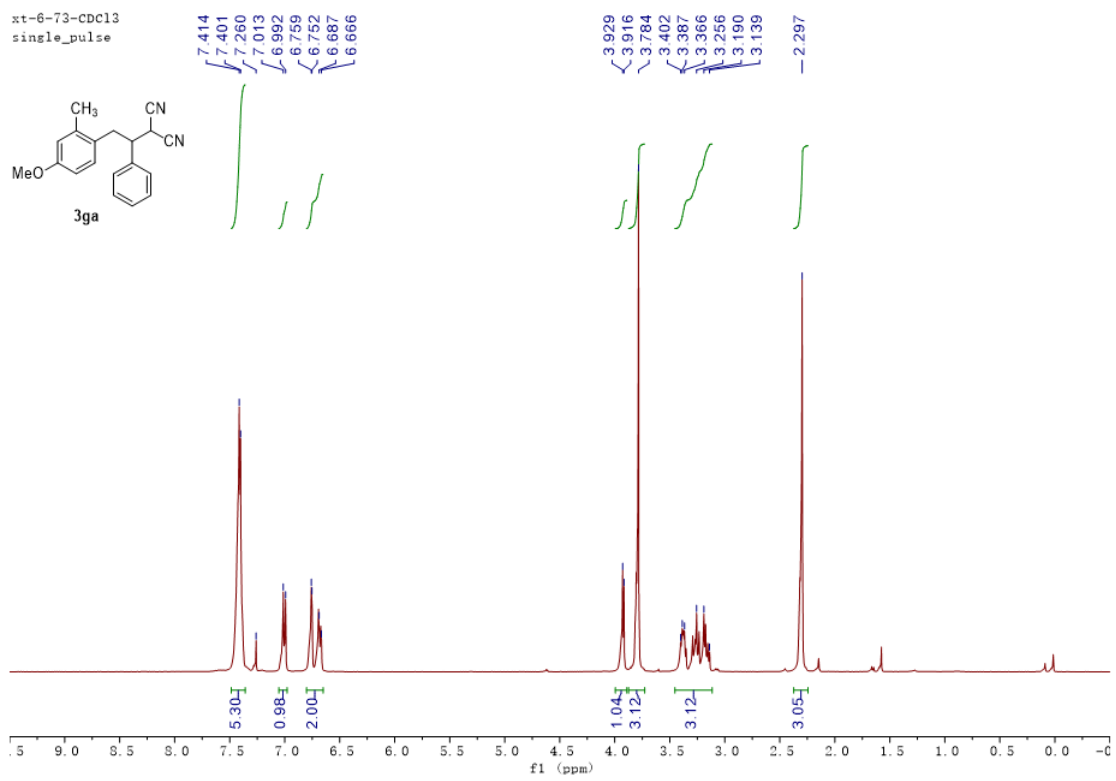

<sup>1</sup>H NMR (400 MHz, CDCl<sub>3</sub>) of 3ga

xt-6-73  
single pulse decoupled gated NOE

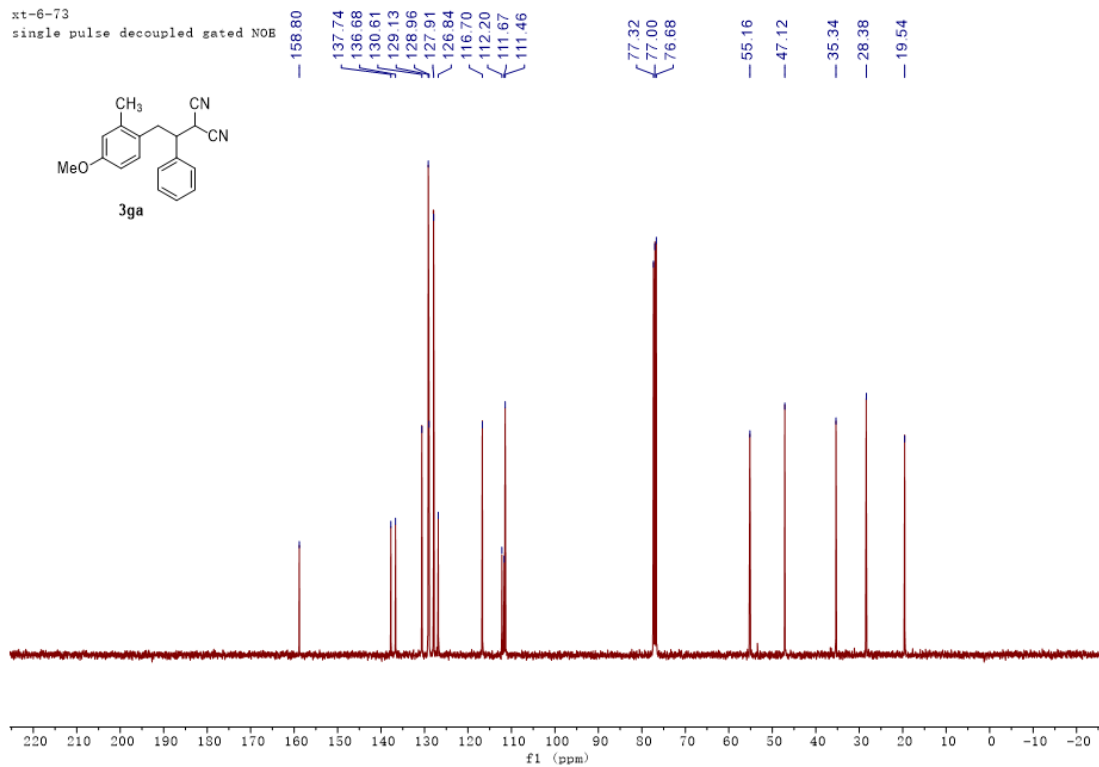

<sup>13</sup>C NMR (101 MHz, CDCl<sub>3</sub>) of **3ga**

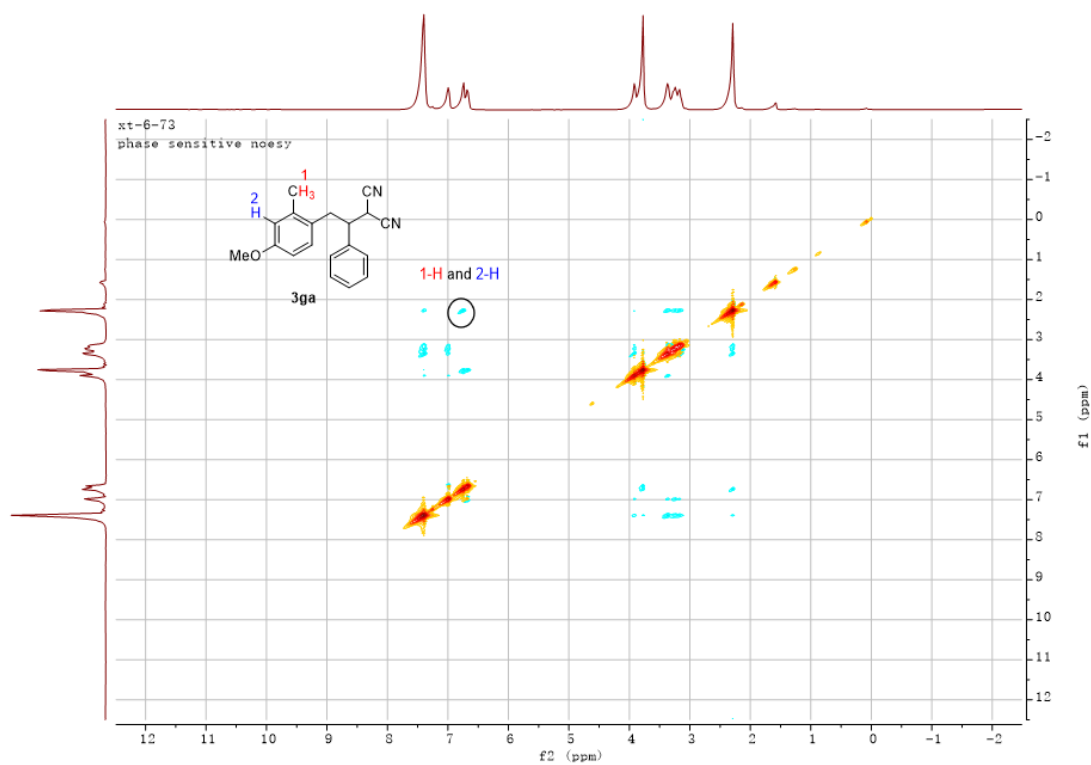

Nuclear Overhauser effect (NOESY) spectroscopy **3ga**

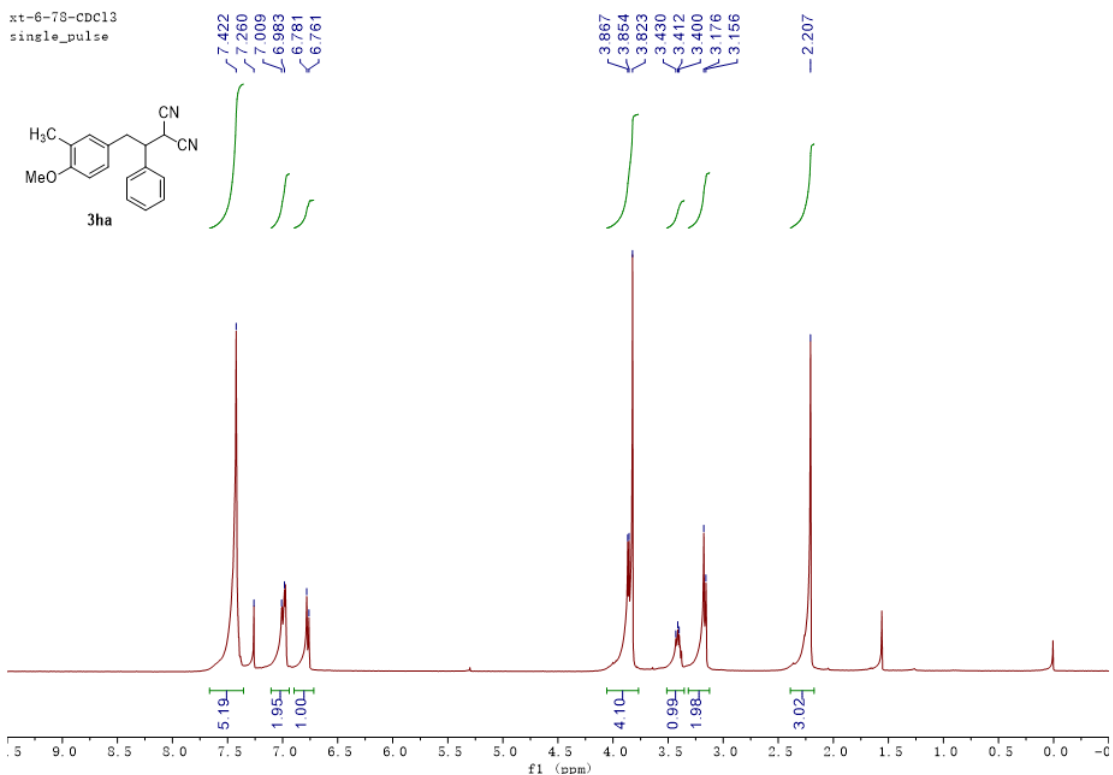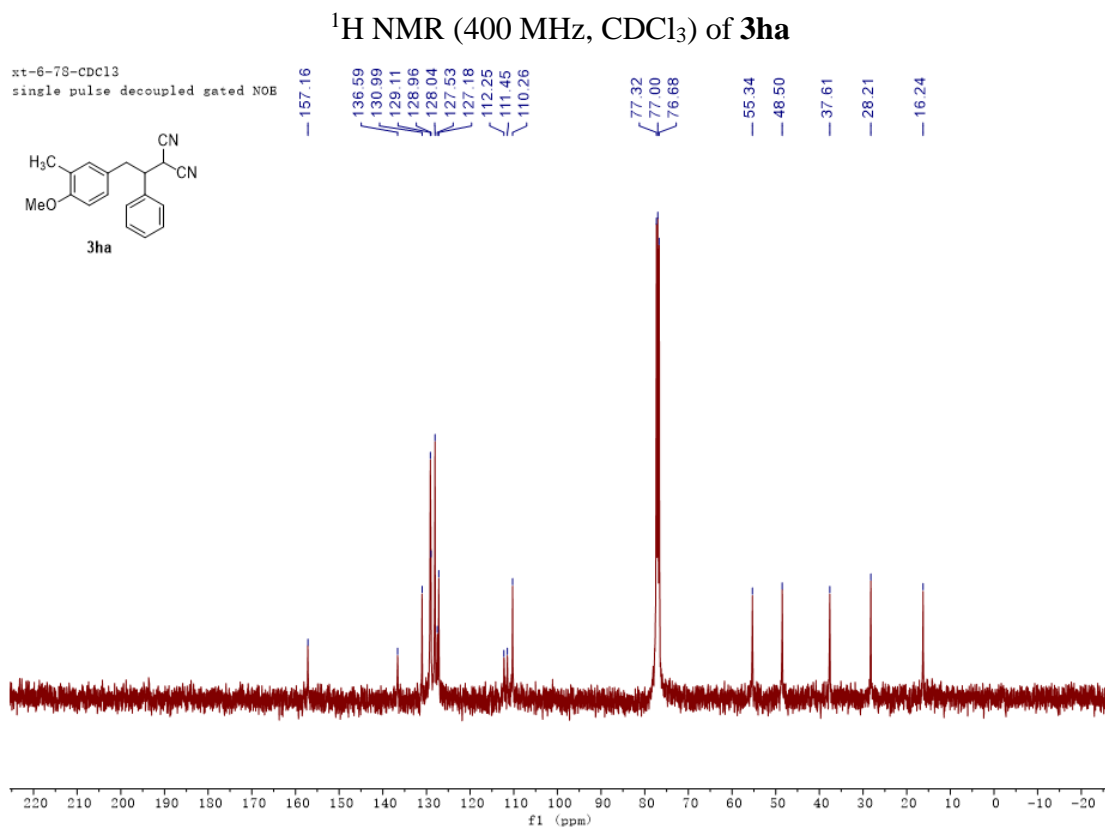

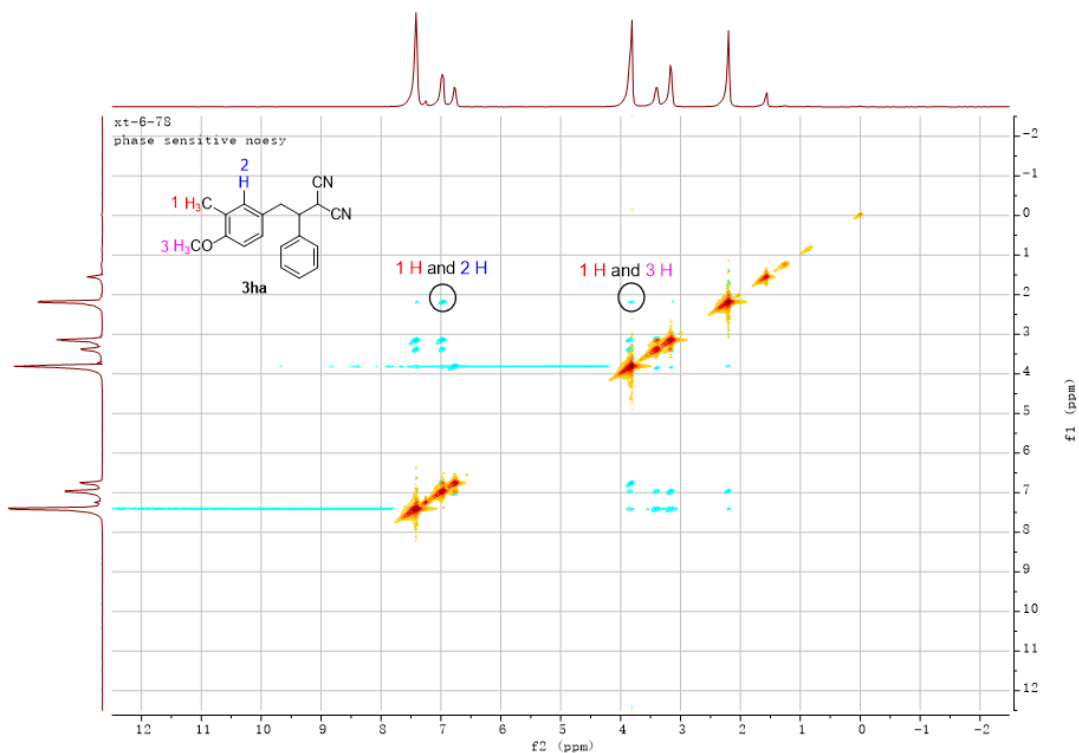

### Nuclear Overhauser effect (NOESY) spectroscopy **3ha**

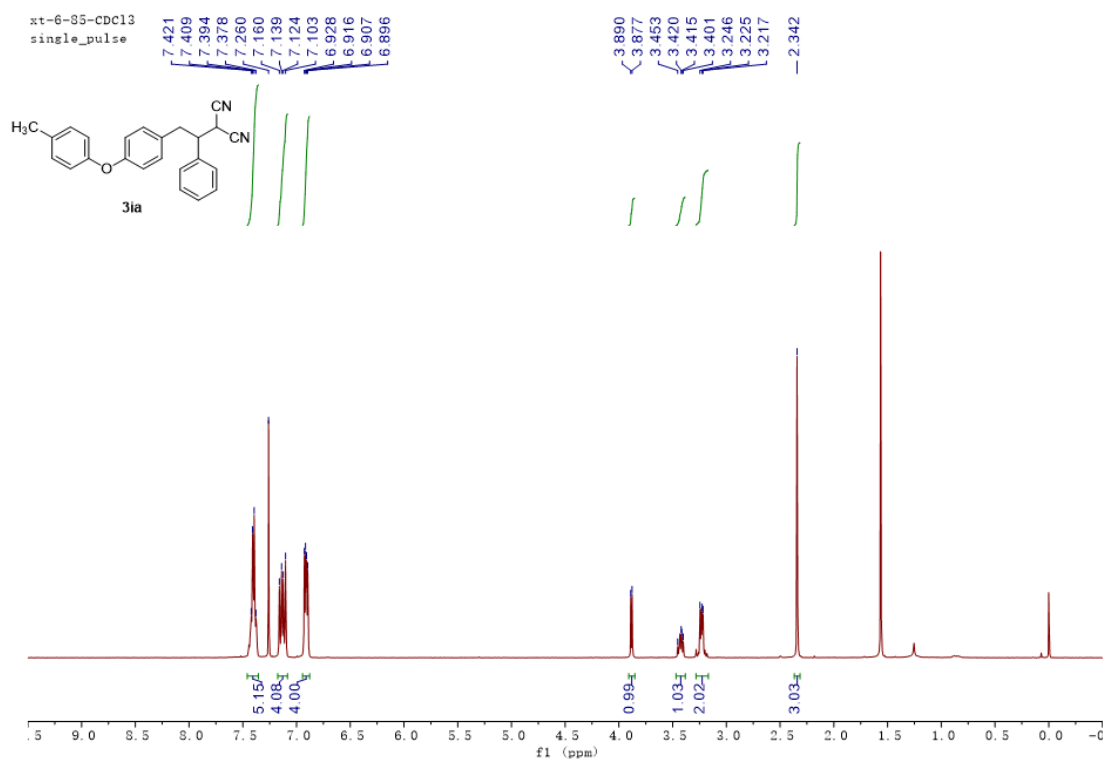

### <sup>1</sup>H NMR (400 MHz, CDCl<sub>3</sub>) of **3ia**



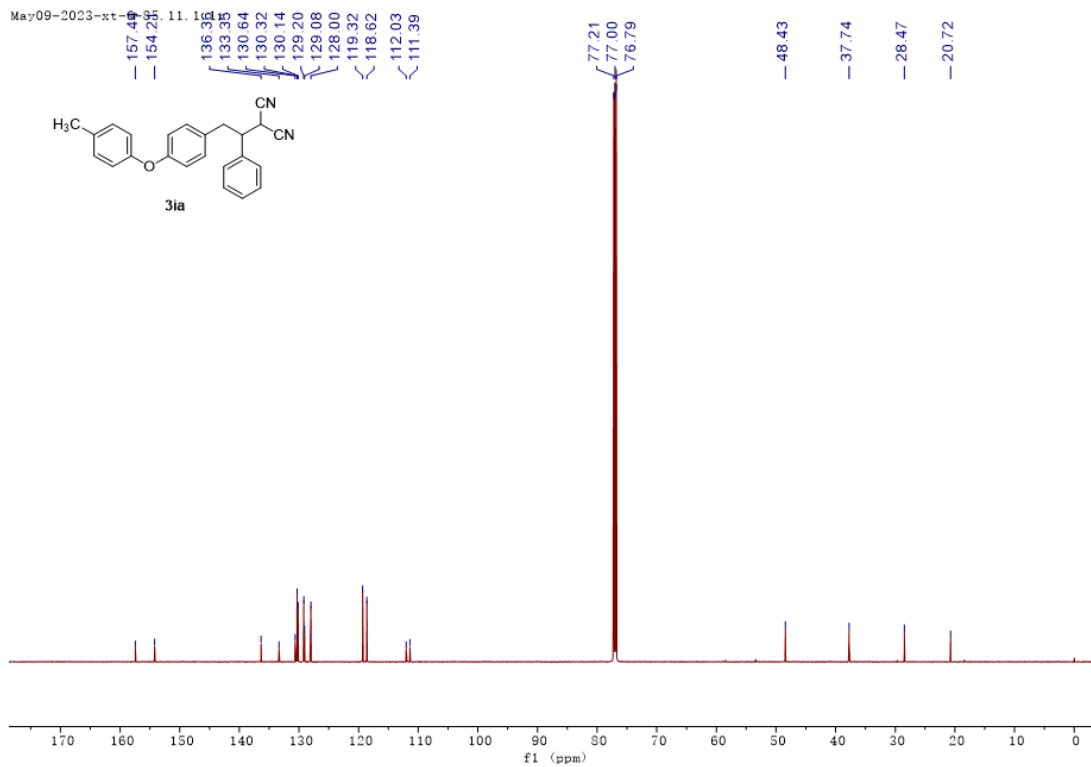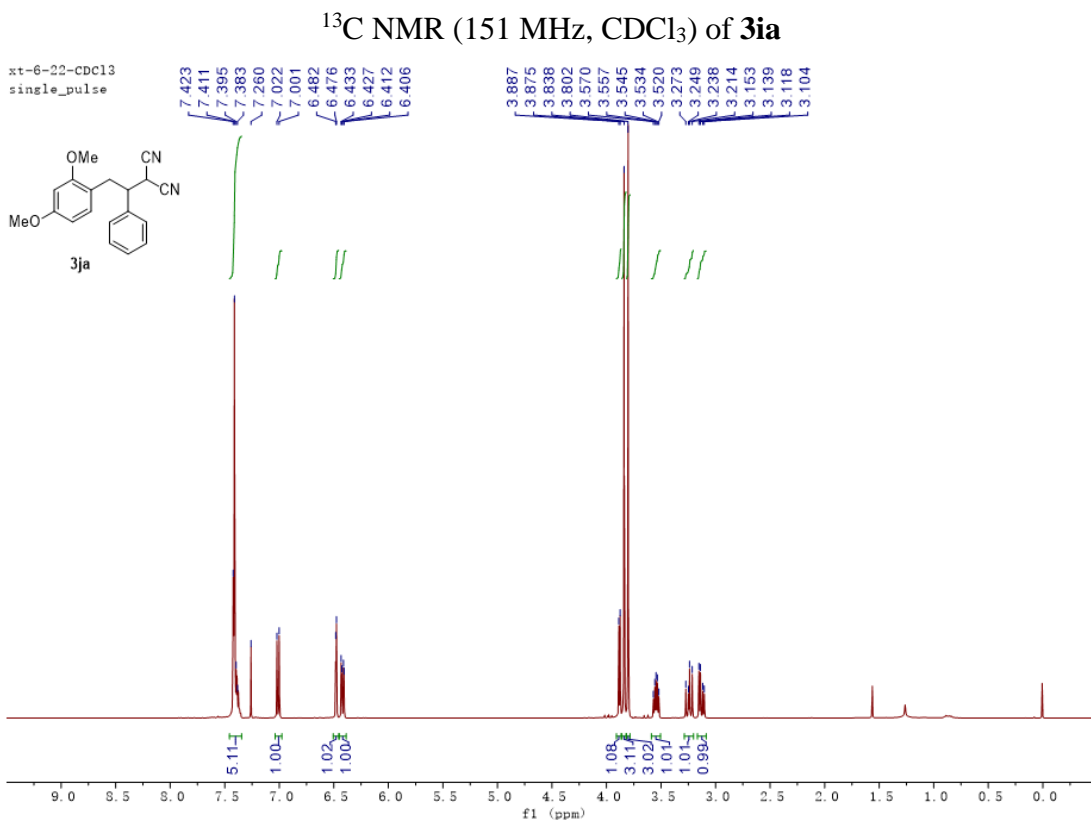

$^1\text{H}$  NMR (400 MHz,  $\text{CDCl}_3$ ) of **3ja**

xt-6-22  
single pulse decoupled gated NOE

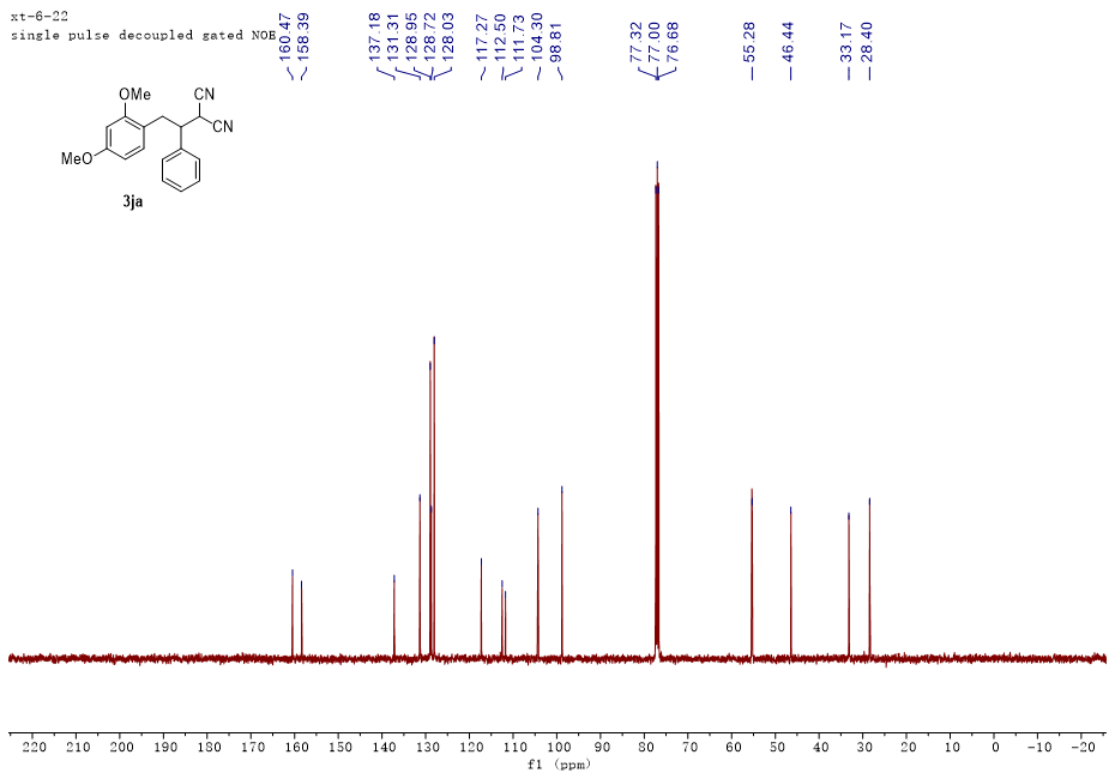

<sup>13</sup>C NMR (101 MHz, CDCl<sub>3</sub>) of **3ja**

XT-6-20-cdcL3  
single\_pulse

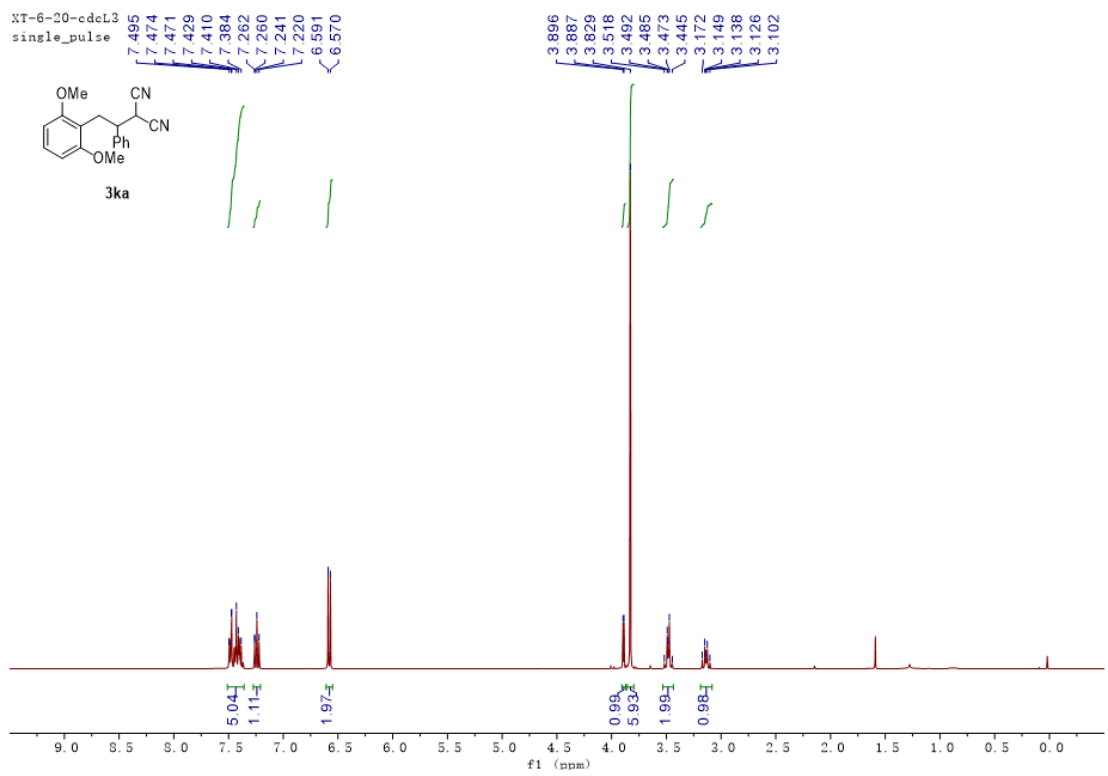

<sup>1</sup>H NMR (400 MHz, CDCl<sub>3</sub>) of **3ka**

xt-6-20-cdc13  
single pulse decoupled gated NOB

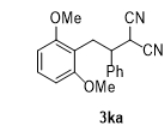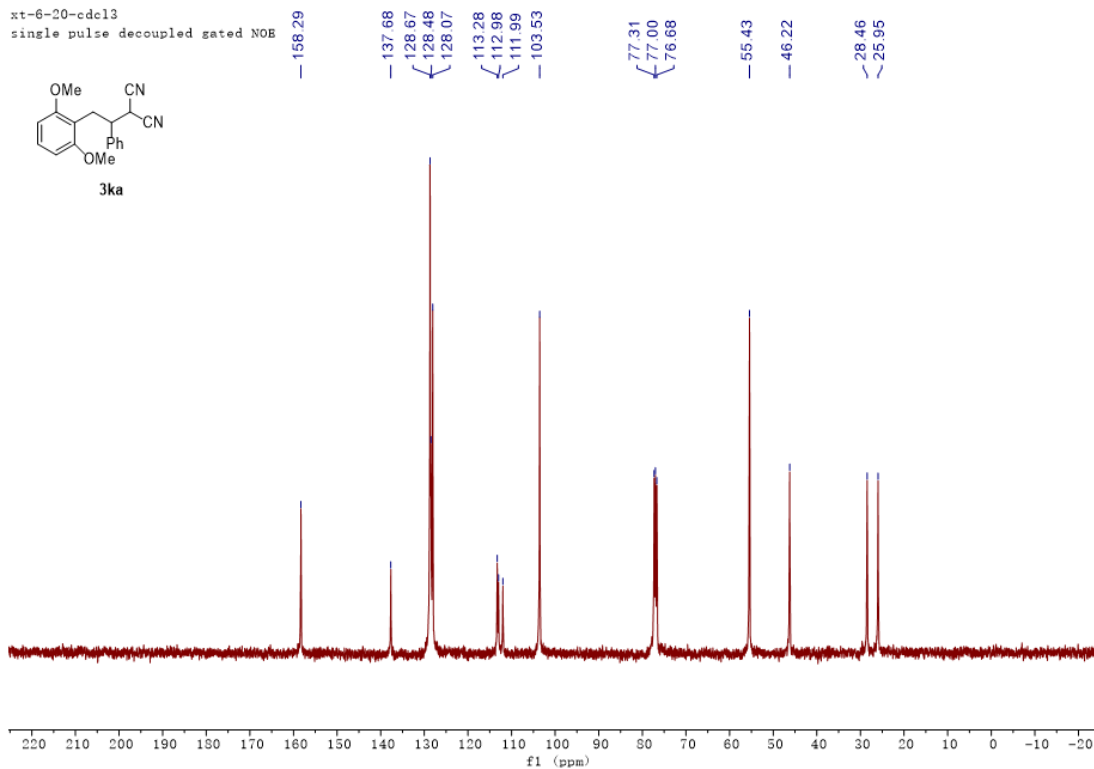

$^{13}\text{C}$  NMR (101 MHz,  $\text{CDCl}_3$ ) of **3ka**

xt-6-11-cdc13  
single\_pulse

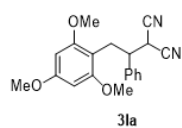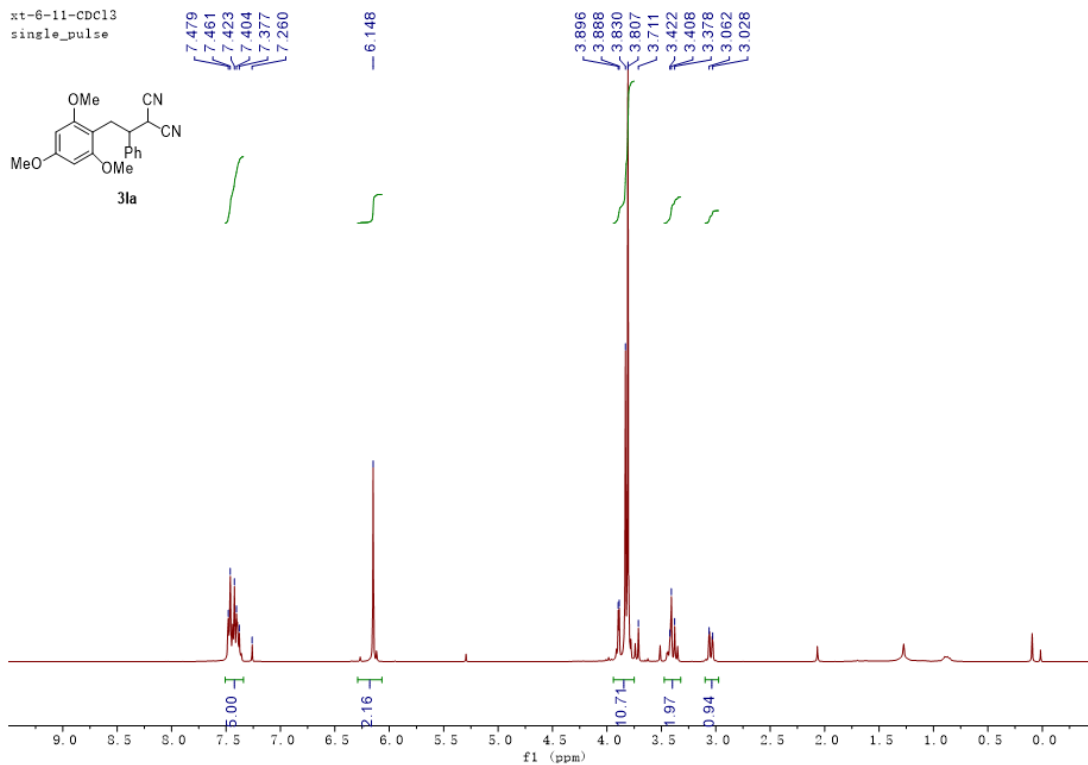

$^1\text{H}$  NMR (400 MHz,  $\text{CDCl}_3$ ) of **3la**

xt-6-11-CDCl3  
single pulse decoupled gated NOE

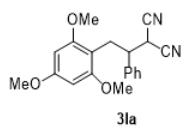

160.63  
159.00  
137.75  
128.67  
128.45  
128.11  
113.08  
112.03  
105.66  
90.34  
77.32  
77.00  
76.68  
55.33  
46.58  
28.36  
25.72

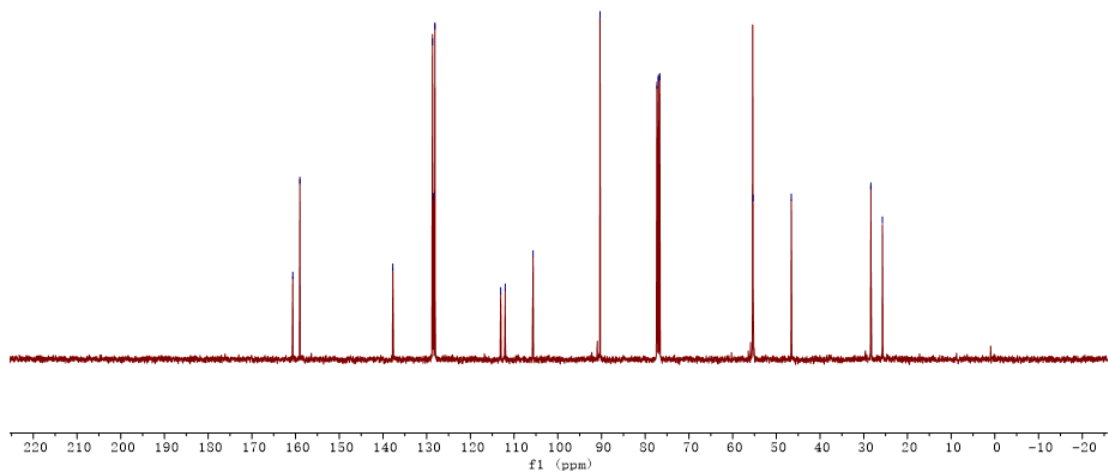

<sup>13</sup>C NMR (101 MHz, CDCl<sub>3</sub>) of **3la**

xt-6-3  
single\_pulse

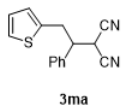

7.439  
7.427  
7.415  
7.389  
7.226  
7.213  
6.964  
6.956  
6.952  
6.943  
6.906  
3.981  
3.969  
3.595  
3.577  
3.564  
3.545  
3.511  
3.498  
3.483  
3.477  
3.467  
3.433  
3.418

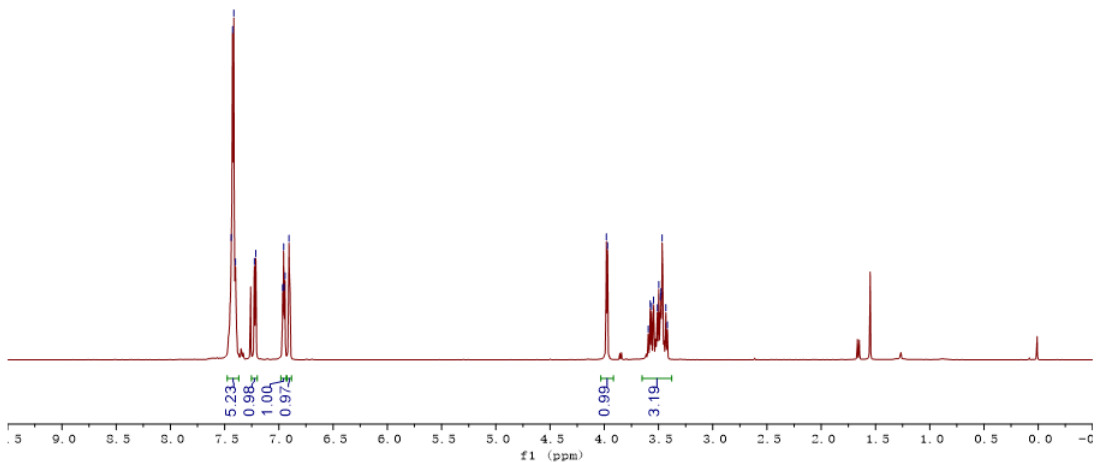

<sup>1</sup>H NMR (400 MHz, CDCl<sub>3</sub>) of **3ma**

xt-6-2-cdcl3-2  
single pulse decoupled gated NOE

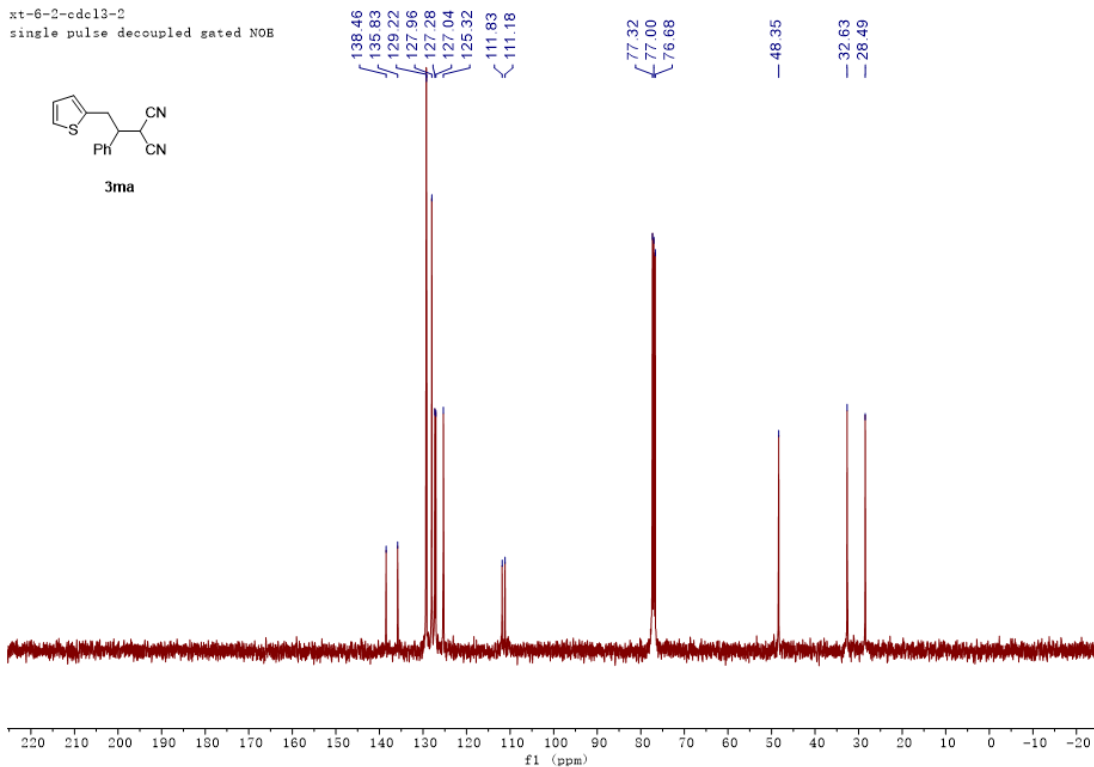

<sup>13</sup>C NMR (101 MHz, CDCl<sub>3</sub>) of **3ma**

xt-6-3  
single\_pulse

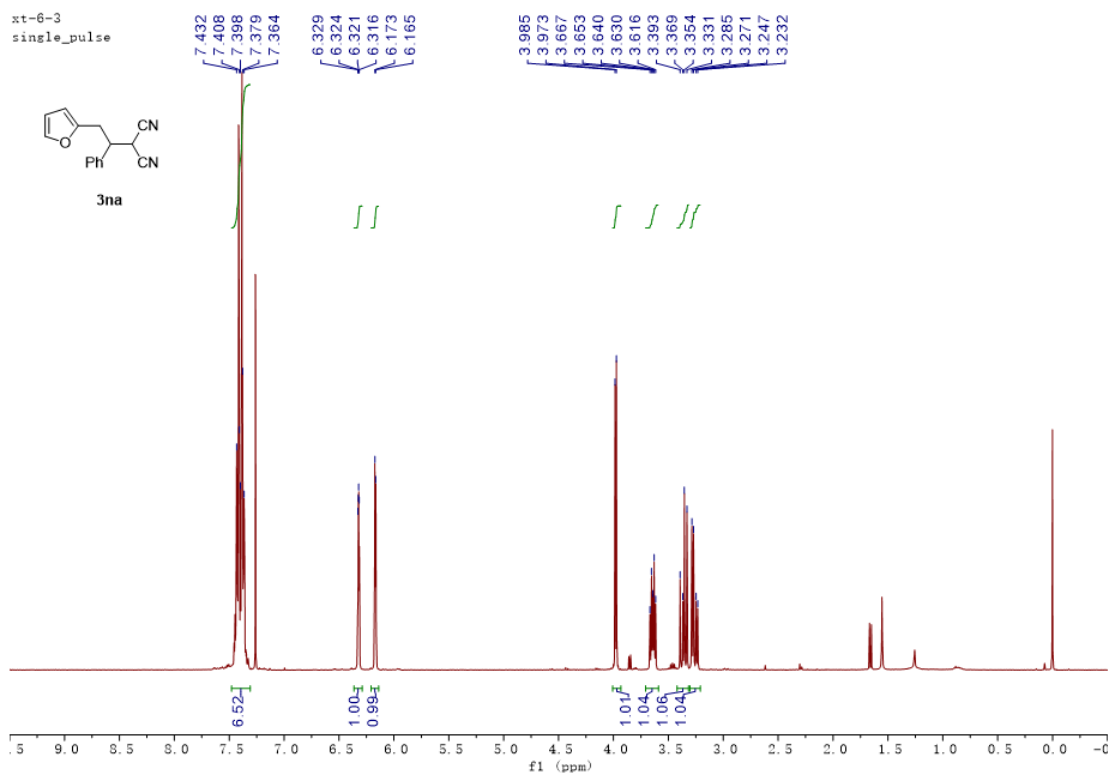

<sup>1</sup>H NMR (400 MHz, CDCl<sub>3</sub>) of **3na**

xt-6-3  
single pulse decoupled gated NOE

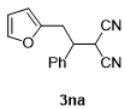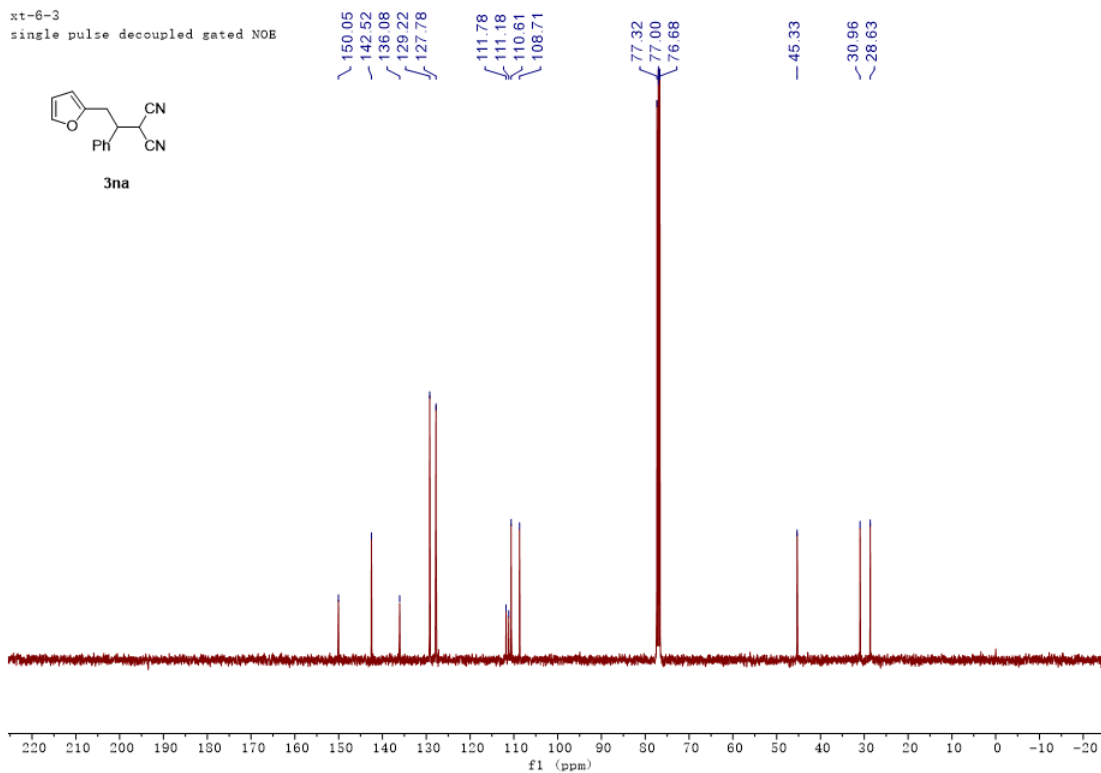

$^{13}\text{C}$  NMR (101 MHz,  $\text{CDCl}_3$ ) of **3na**

xt-6-41-cdcl3  
single\_pulse

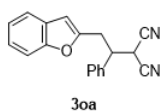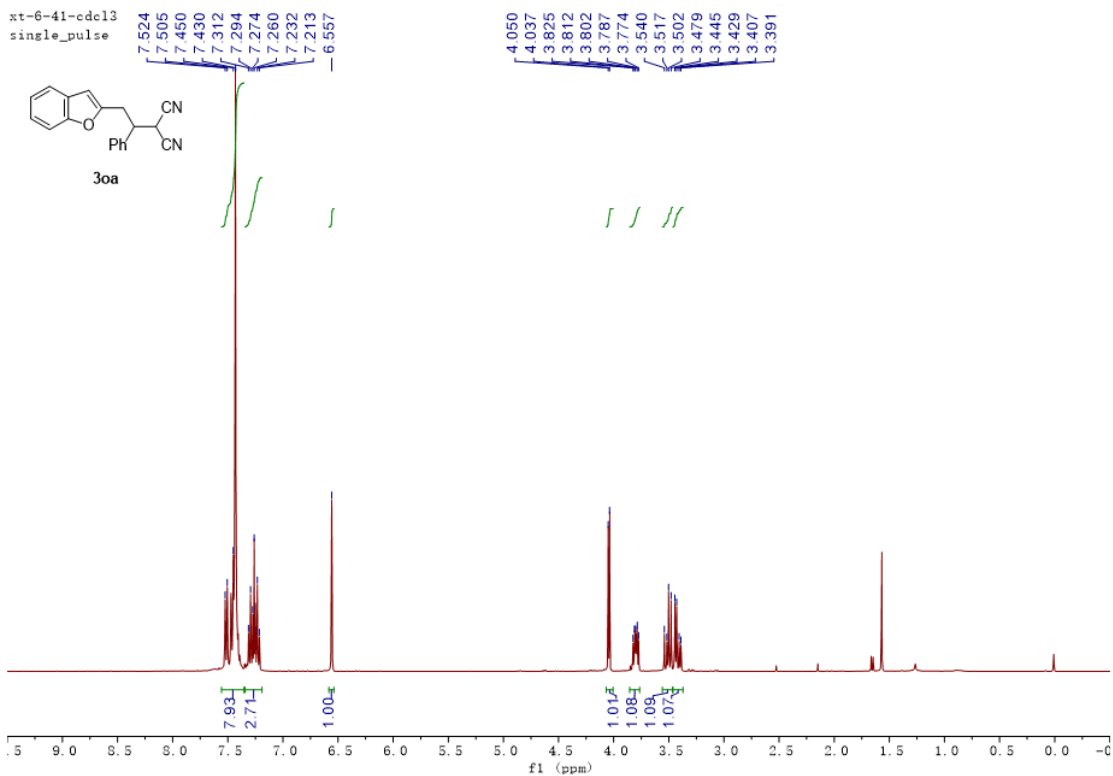

$^1\text{H}$  NMR (400 MHz,  $\text{CDCl}_3$ ) of **3oa**

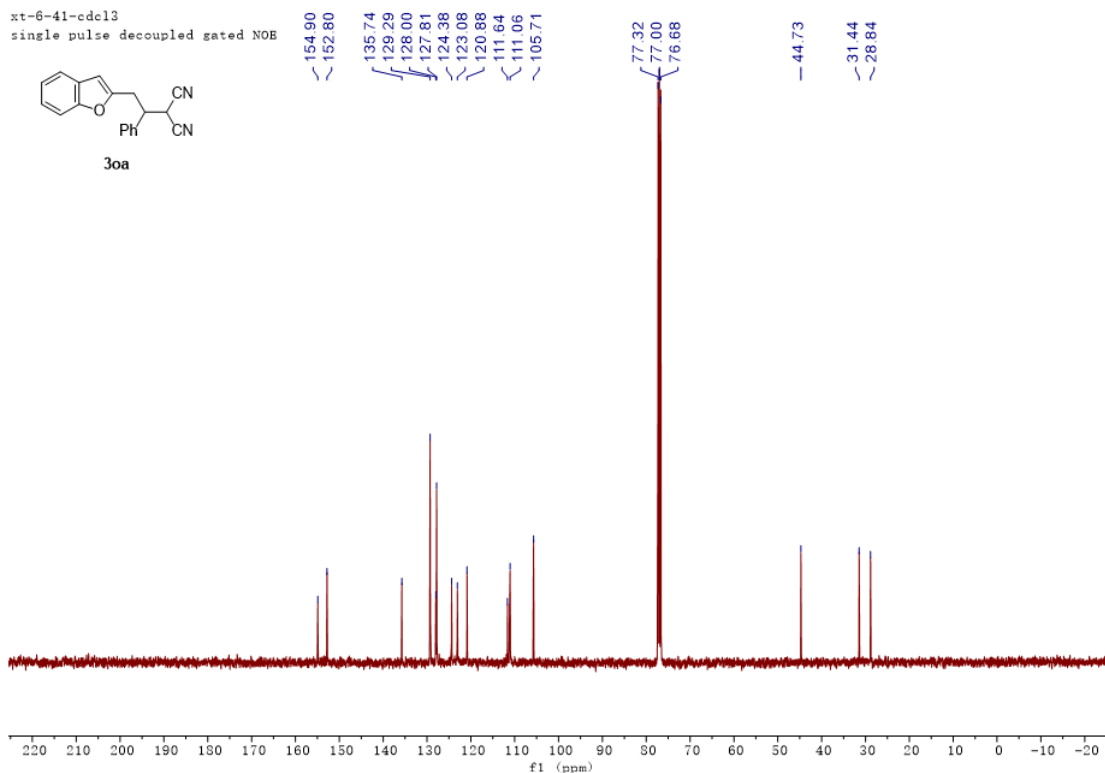

<sup>13</sup>C NMR (101 MHz, CDCl<sub>3</sub>) of 30a

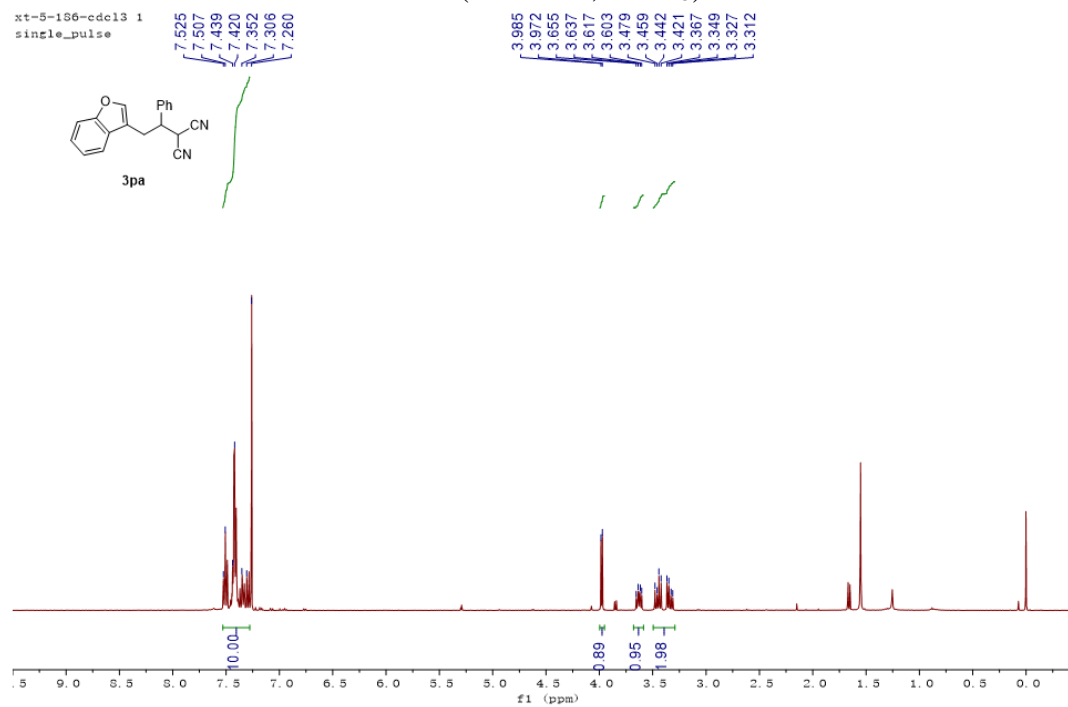

<sup>1</sup>H NMR (400 MHz, CDCl<sub>3</sub>) of 3pa

Nov16-2023-xt-5-166-CDC13. 10. 1. 1r

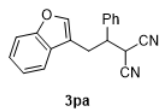

155.40  
142.87  
136.22  
129.36  
129.27  
127.84  
126.87  
125.02  
123.02  
119.02  
115.35  
111.94  
111.81  
111.38

77.21  
77.00  
76.79

45.95

28.96  
26.90

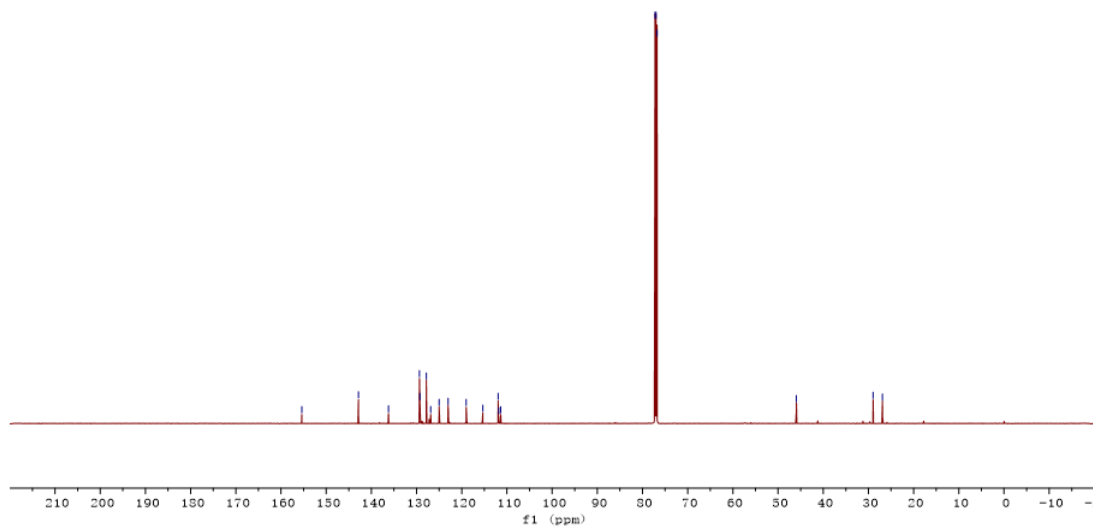

$^{13}\text{C}$  NMR (101 MHz,  $\text{CDCl}_3$ ) of **3pa**

xt-6-7-CDCl3  
single\_pulse

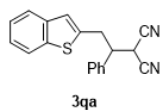

7.788  
7.769  
7.719  
7.701  
7.447  
7.378  
7.363  
7.343  
7.323  
7.260  
7.154

4.026  
4.014  
3.681  
3.660  
3.602  
3.532  
3.499

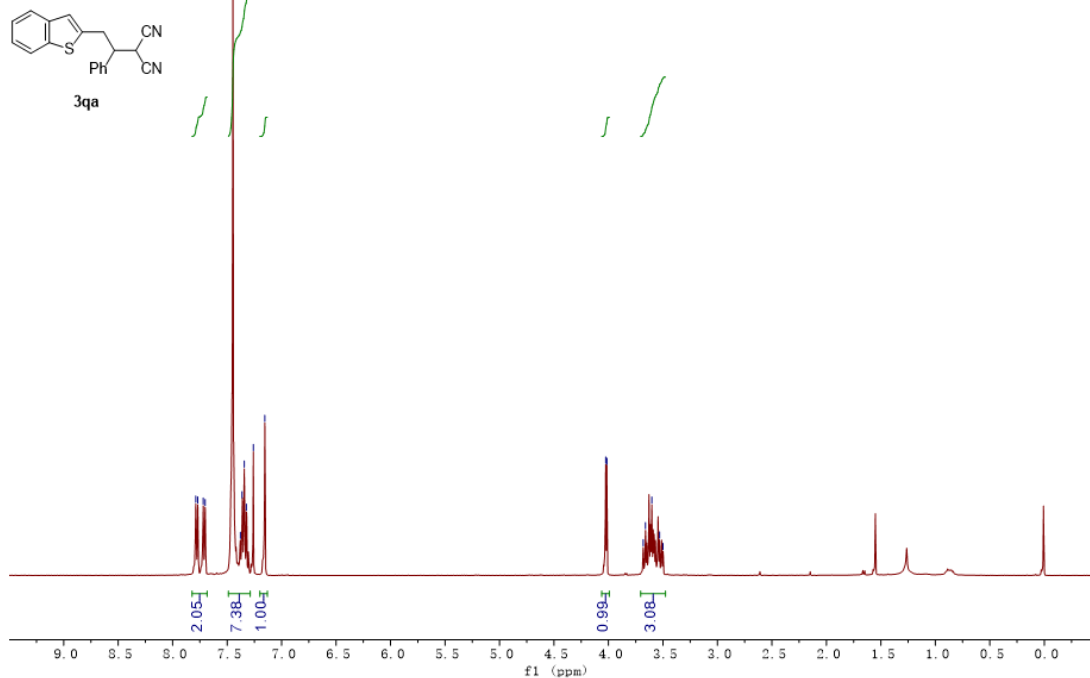

$^1\text{H}$  NMR (400 MHz,  $\text{CDCl}_3$ ) of **3qa**



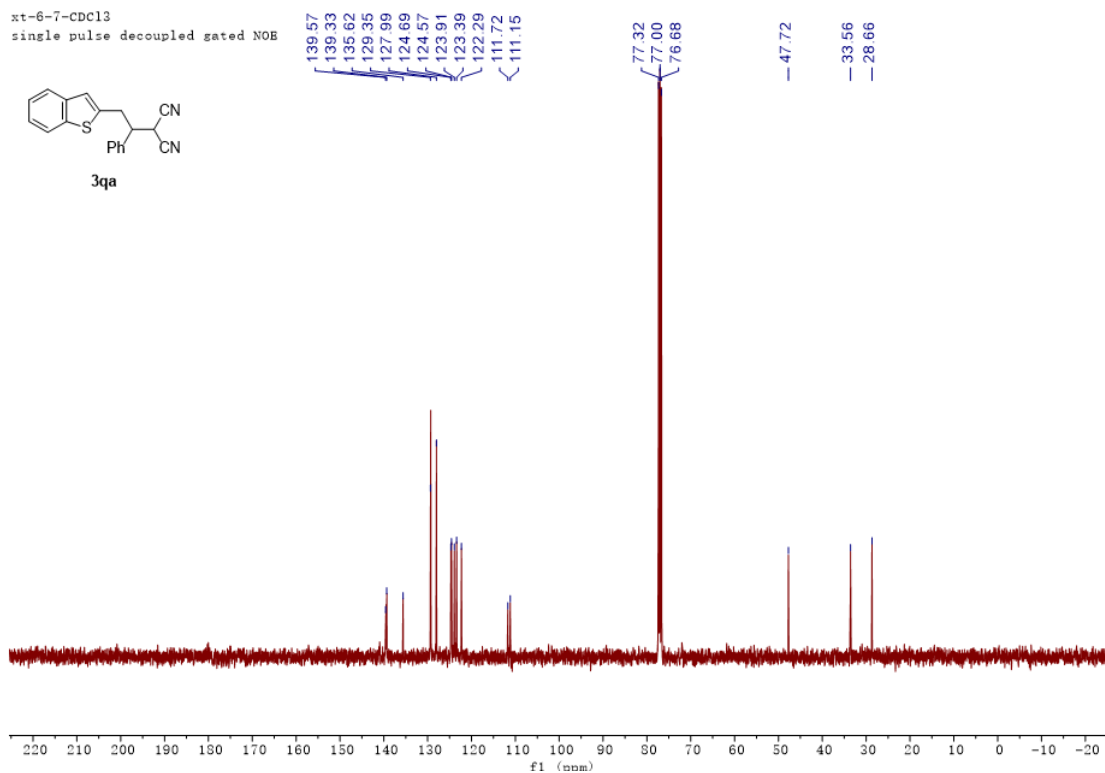

<sup>13</sup>C NMR (101 MHz, CDCl<sub>3</sub>) of **3qa**

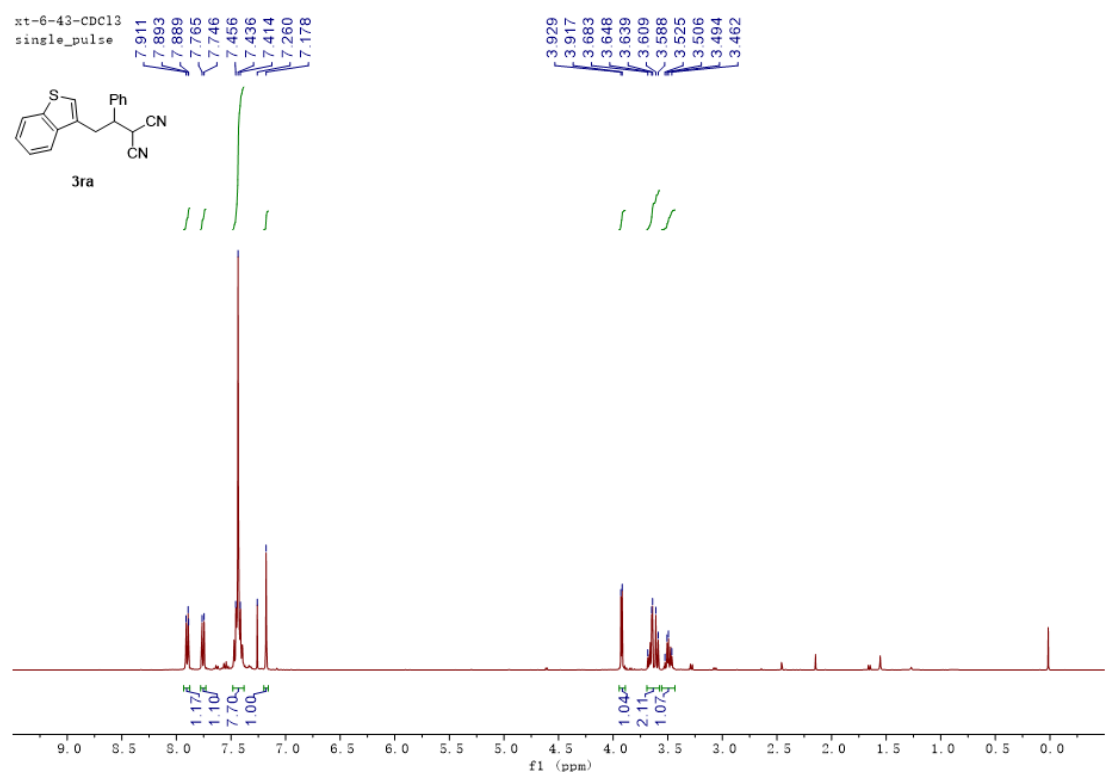

<sup>1</sup>H NMR (400 MHz, CDCl<sub>3</sub>) of **3ra**

xt-6-43-CDCl3

single pulse decoupled gated NO

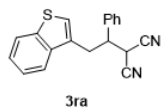

140.67  
137.82  
136.38  
130.87  
129.31  
129.19  
127.84  
124.84  
124.71  
123.27  
121.10  
111.88

77.32  
77.00  
76.68

45.93

31.48  
28.90

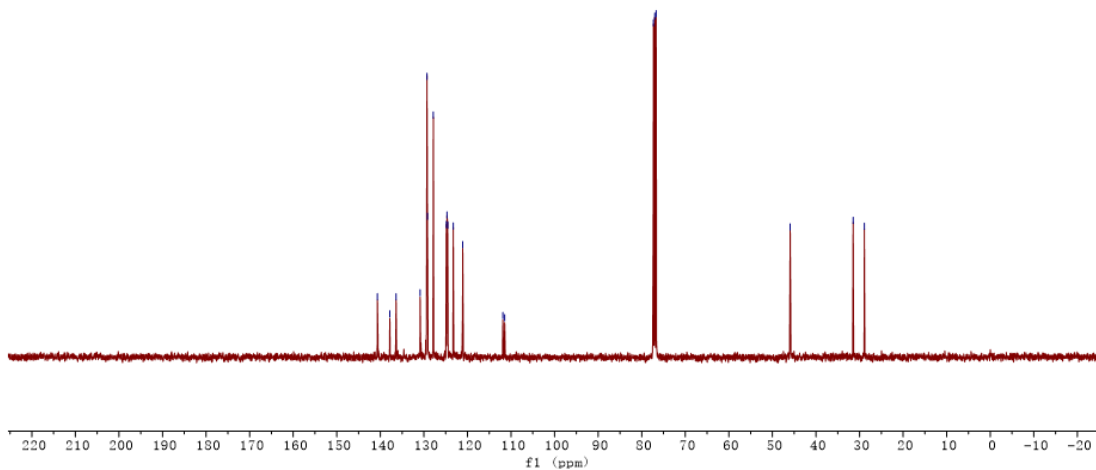

<sup>13</sup>C NMR (101 MHz, CDCl<sub>3</sub>) of **3ra**

xt-6-1-CDCl3

single\_pulse

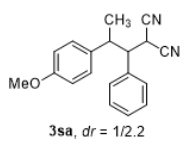

7.523  
7.504  
7.474  
7.446  
7.429  
7.306  
7.283  
7.260  
6.973  
6.871  
6.849  
6.749  
6.728

4.056  
4.035  
3.839  
3.752  
3.649  
3.638  
3.498  
3.482  
3.387  
3.370  
3.170  
3.160  
3.131  
3.081

1.399  
1.382  
1.126  
1.109

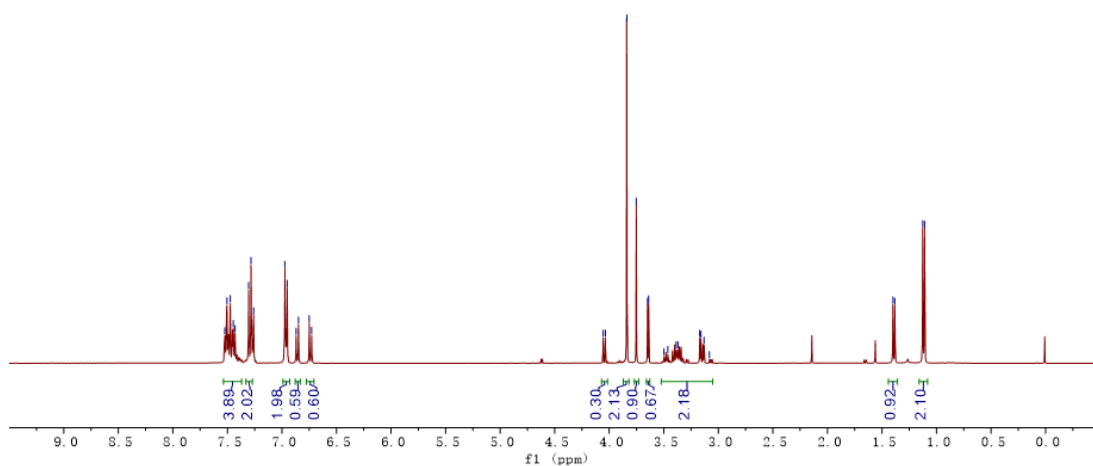

<sup>1</sup>H NMR (400 MHz, CDCl<sub>3</sub>) of **3sa**

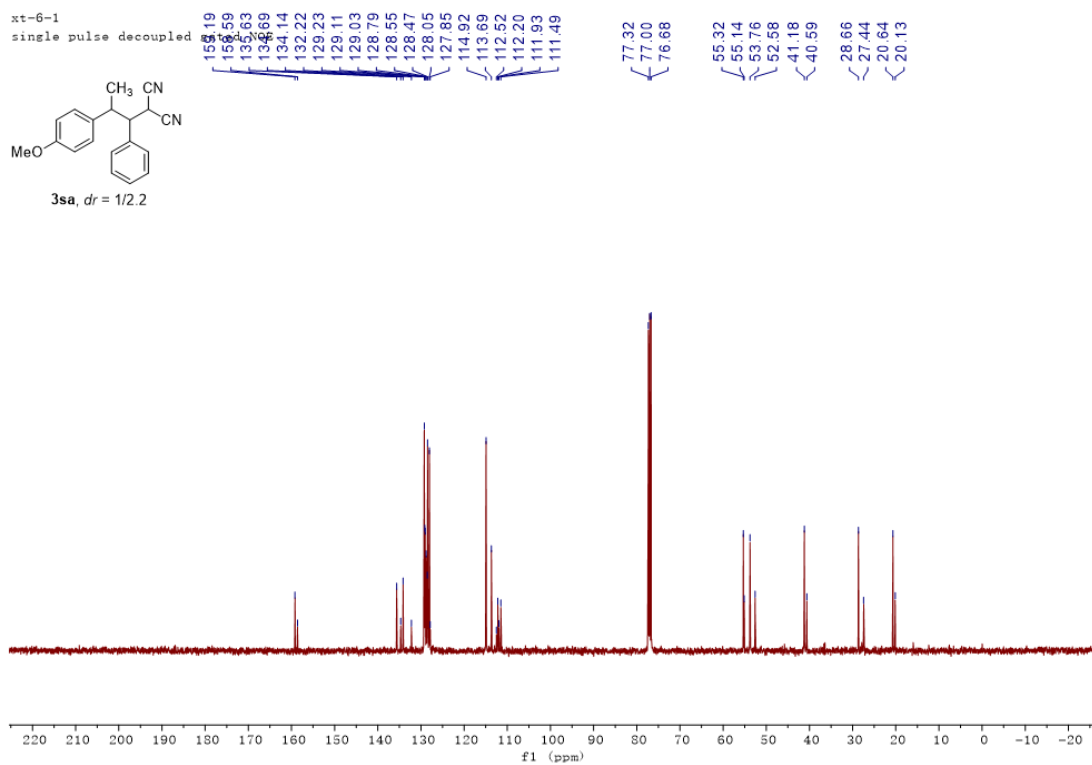

<sup>13</sup>C NMR (101 MHz, CDCl<sub>3</sub>) of 3sa

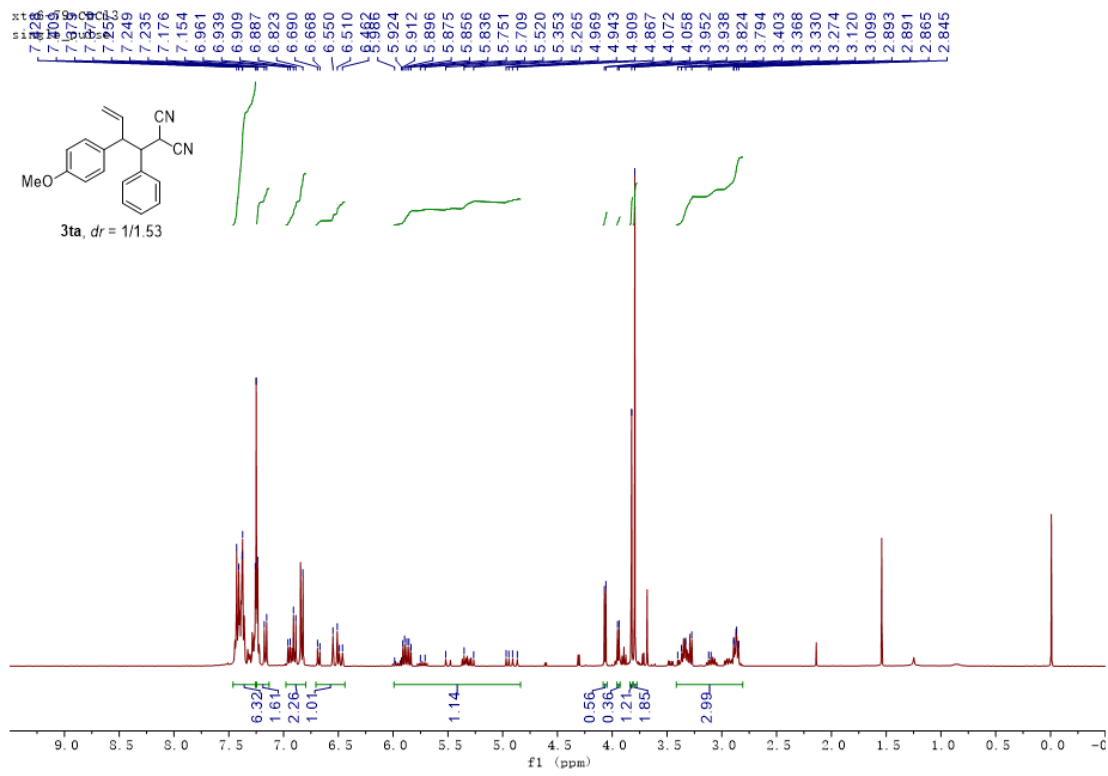

<sup>1</sup>H NMR (400 MHz, CDCl<sub>3</sub>) of 3ta

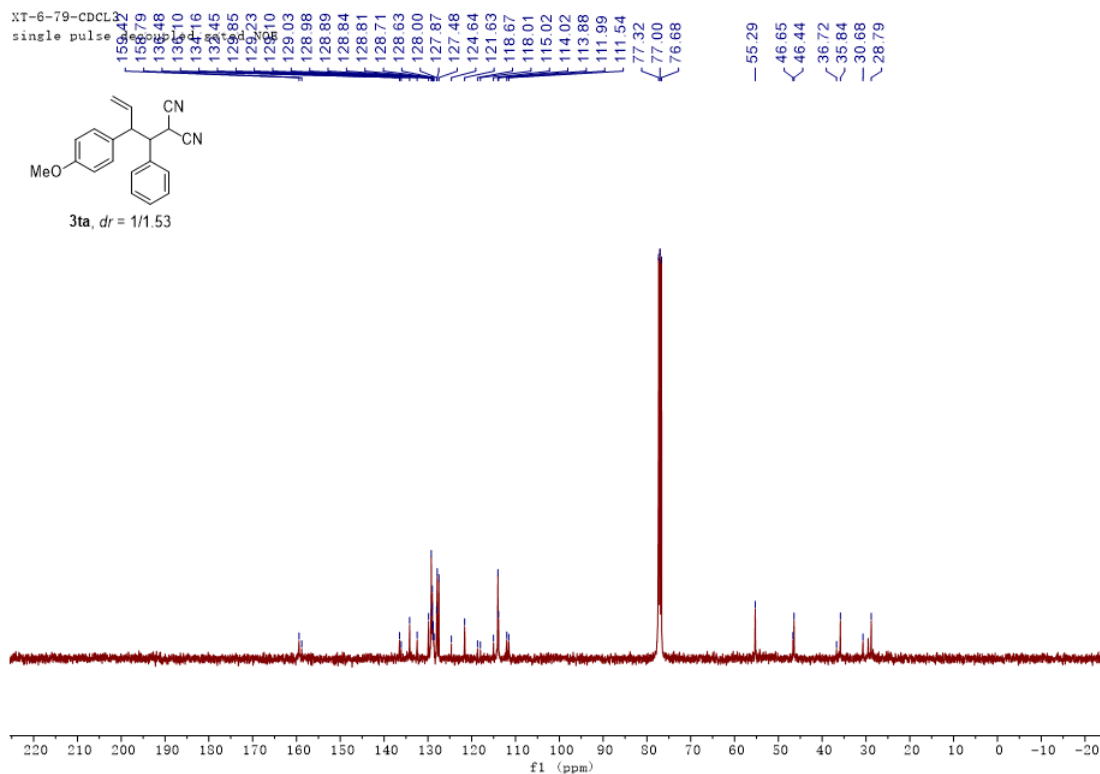

<sup>13</sup>C NMR (101 MHz, CDCl<sub>3</sub>) of **3ta**

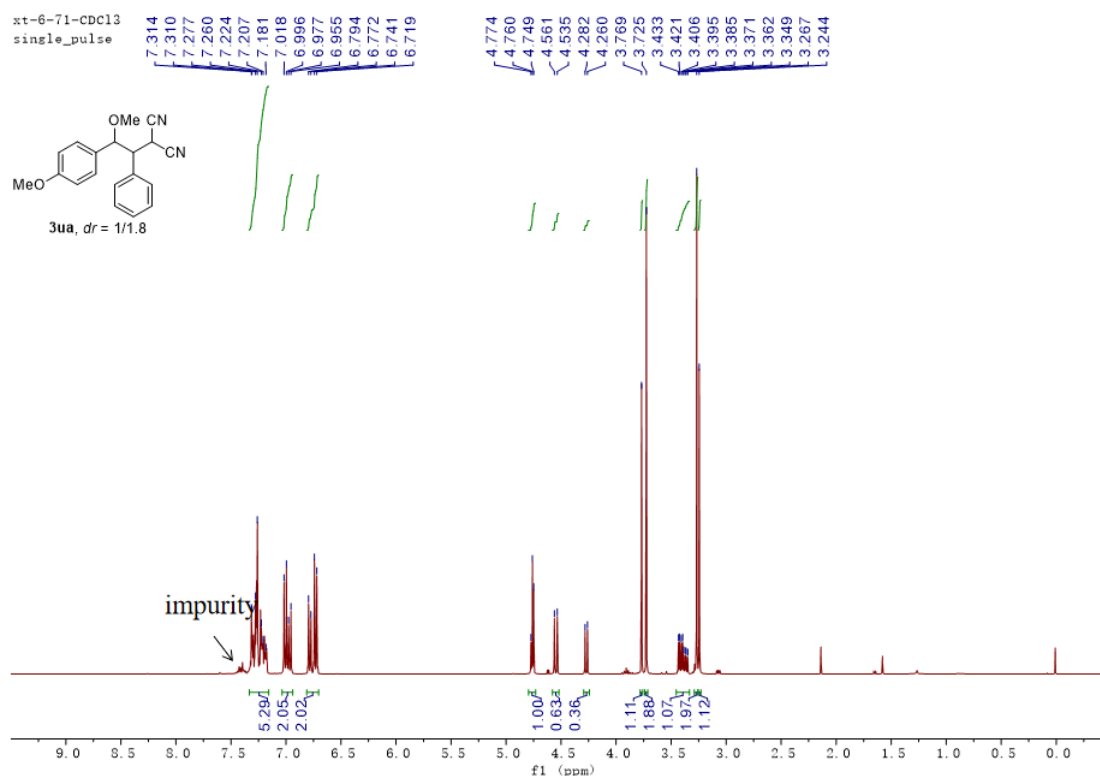

<sup>1</sup>H NMR (400 MHz, CDCl<sub>3</sub>) of **3ua**

xt-6-71

single pulse decoupled gated

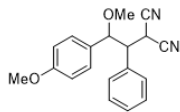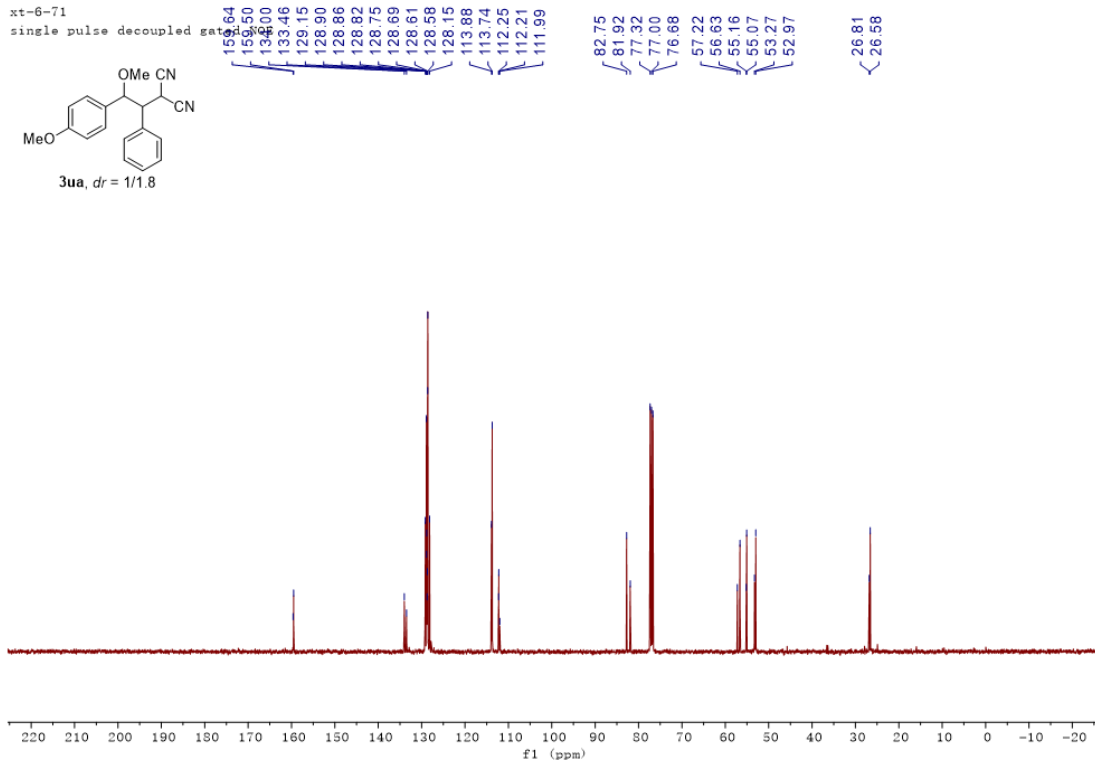

<sup>13</sup>C NMR (101 MHz, CDCl<sub>3</sub>) of **3ua**

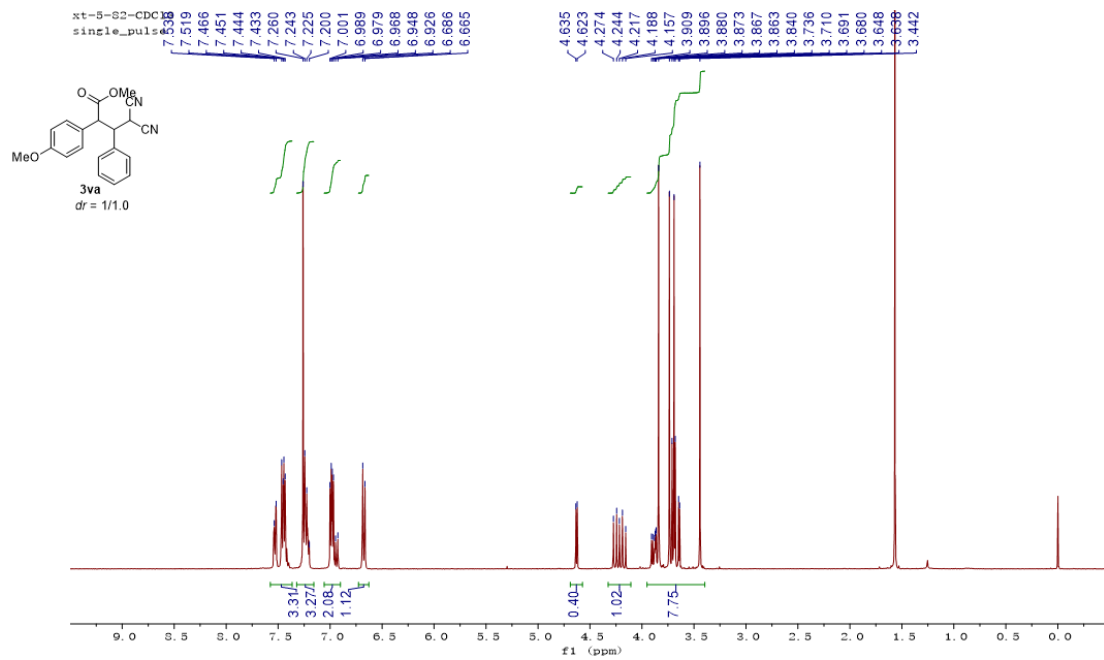

<sup>1</sup>H NMR (400 MHz, CDCl<sub>3</sub>) of **3va**

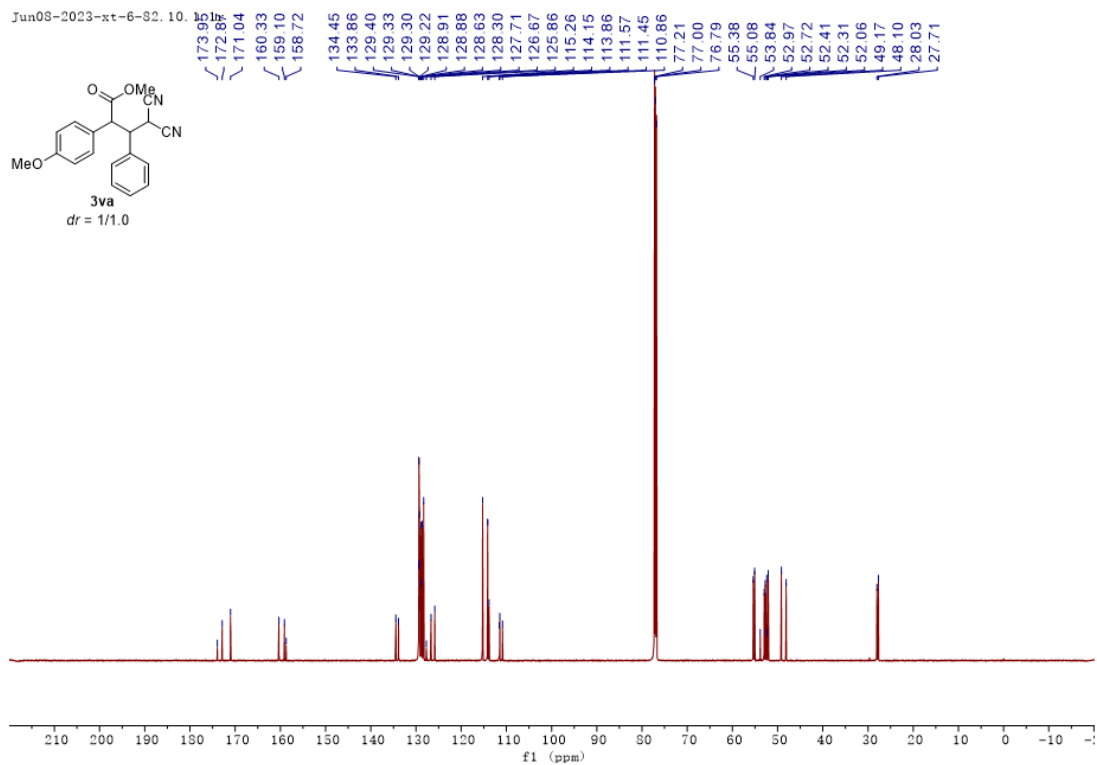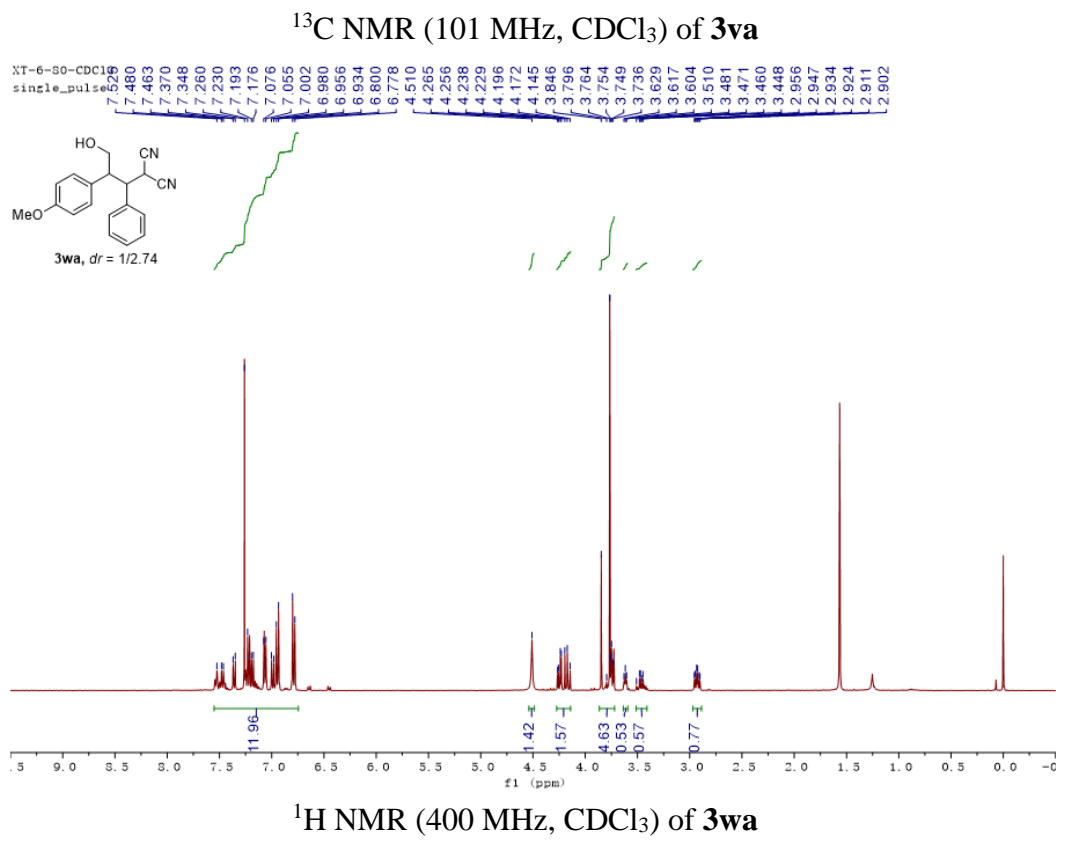

May04-2023-xt-6-30. 10. 1. 1r

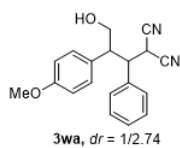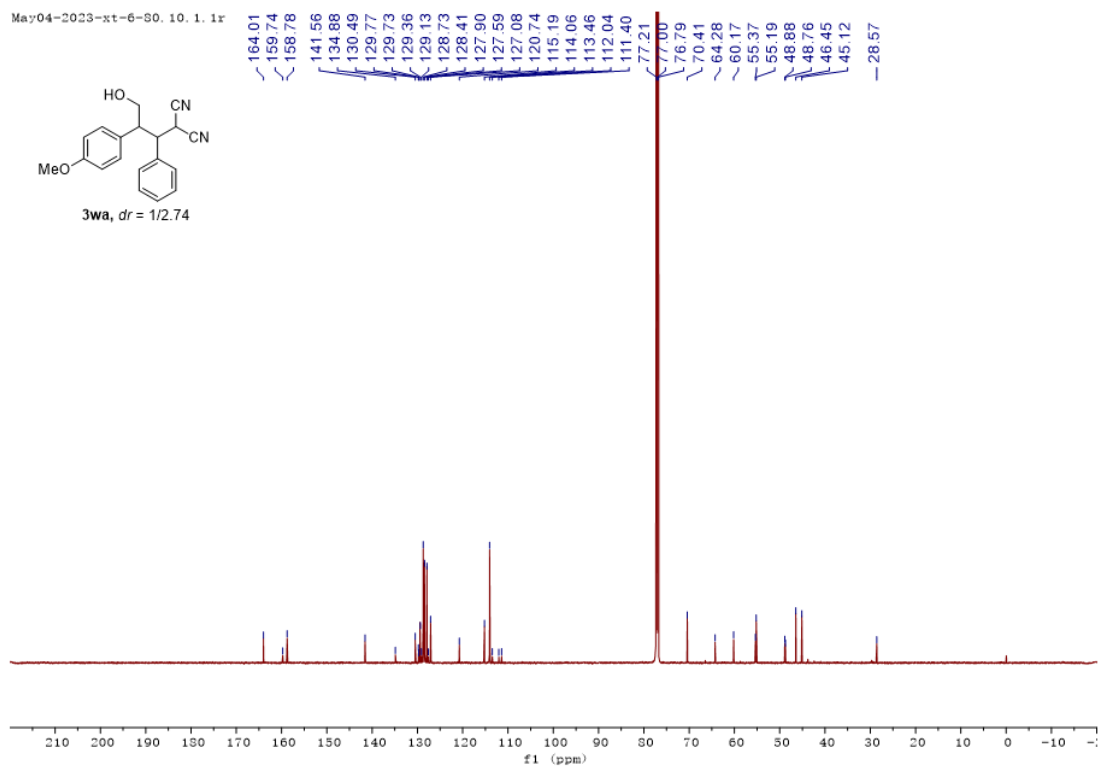

<sup>13</sup>C NMR (151 MHz, CDCl<sub>3</sub>) of **3wa**

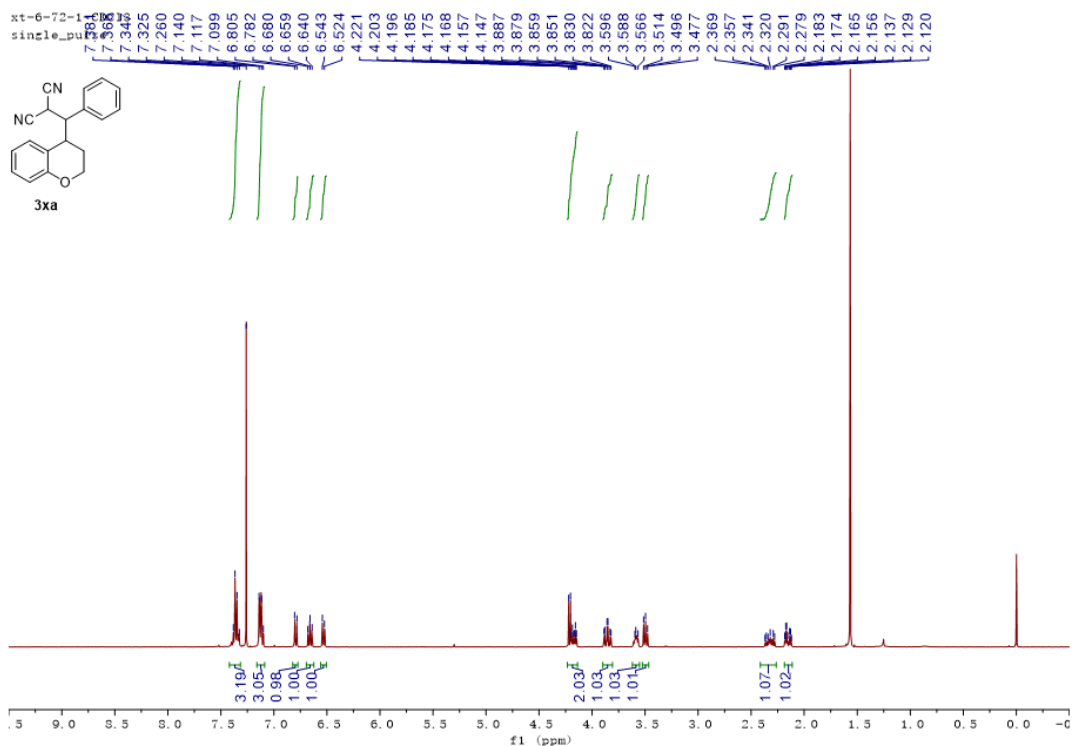

<sup>1</sup>H NMR (400 MHz, CDCl<sub>3</sub>) of **3xa**

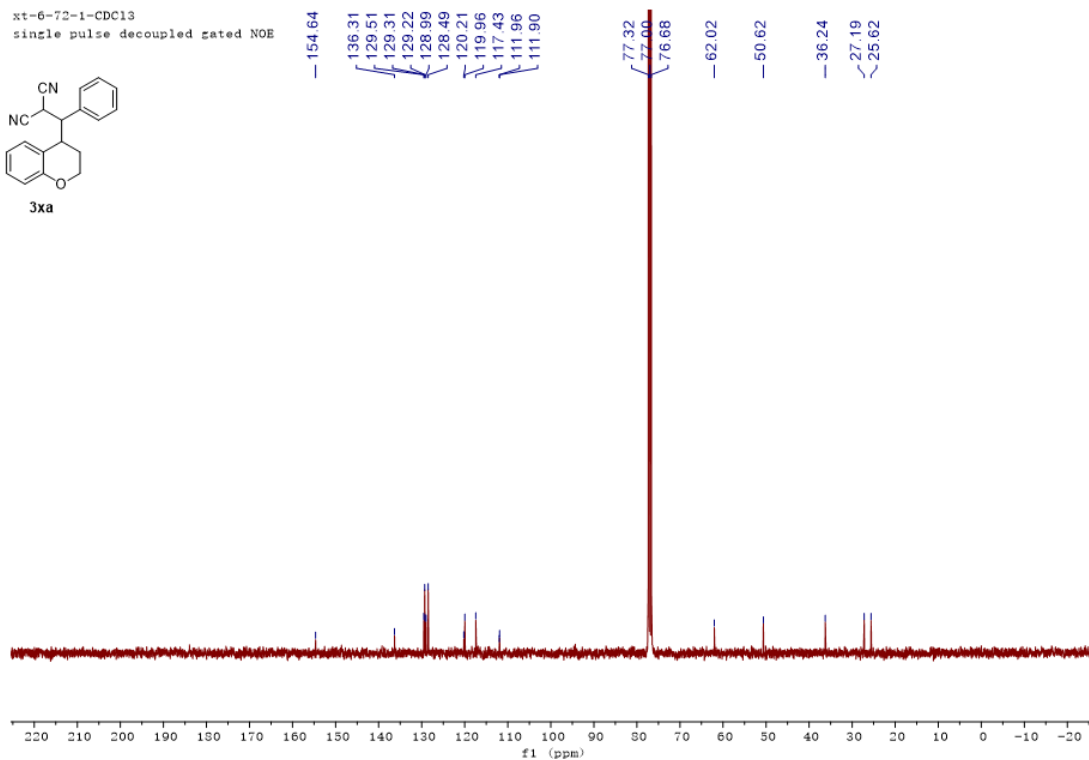

$^{13}\text{C}$  NMR (101 MHz,  $\text{CDCl}_3$ ) of **3xa**

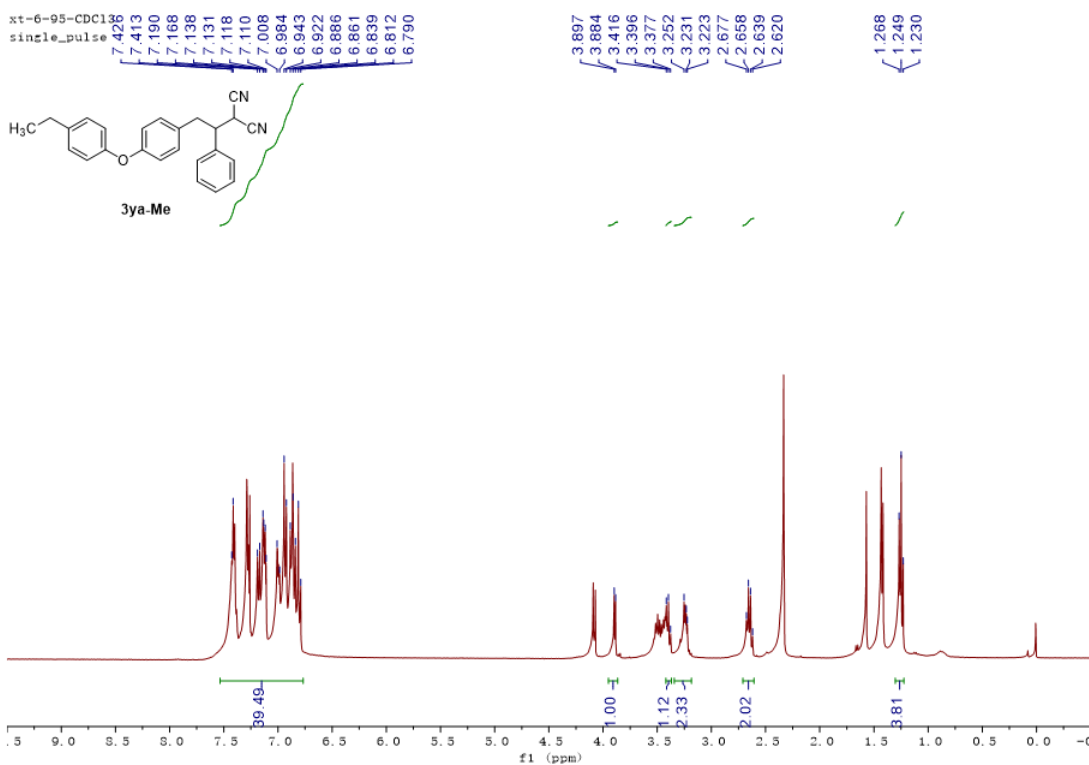

$^1\text{H}$  NMR (400 MHz,  $\text{CDCl}_3$ ) of **3ya-Me**



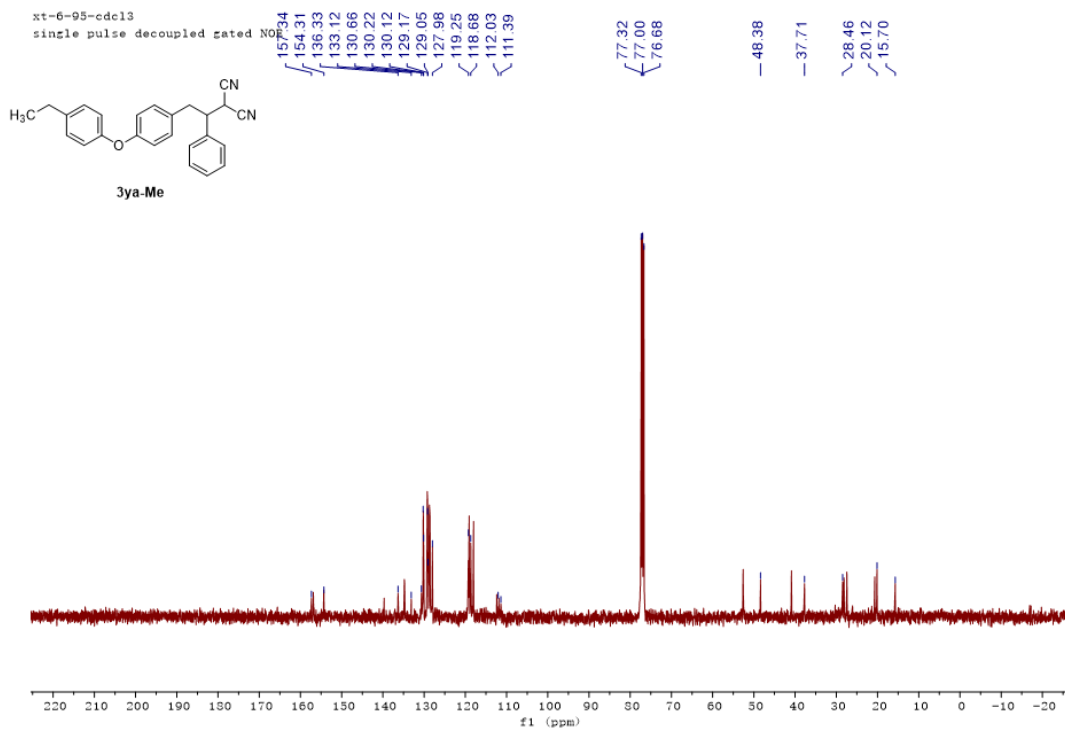

<sup>13</sup>C NMR (101 MHz, CDCl<sub>3</sub>) of **3ya-Me**

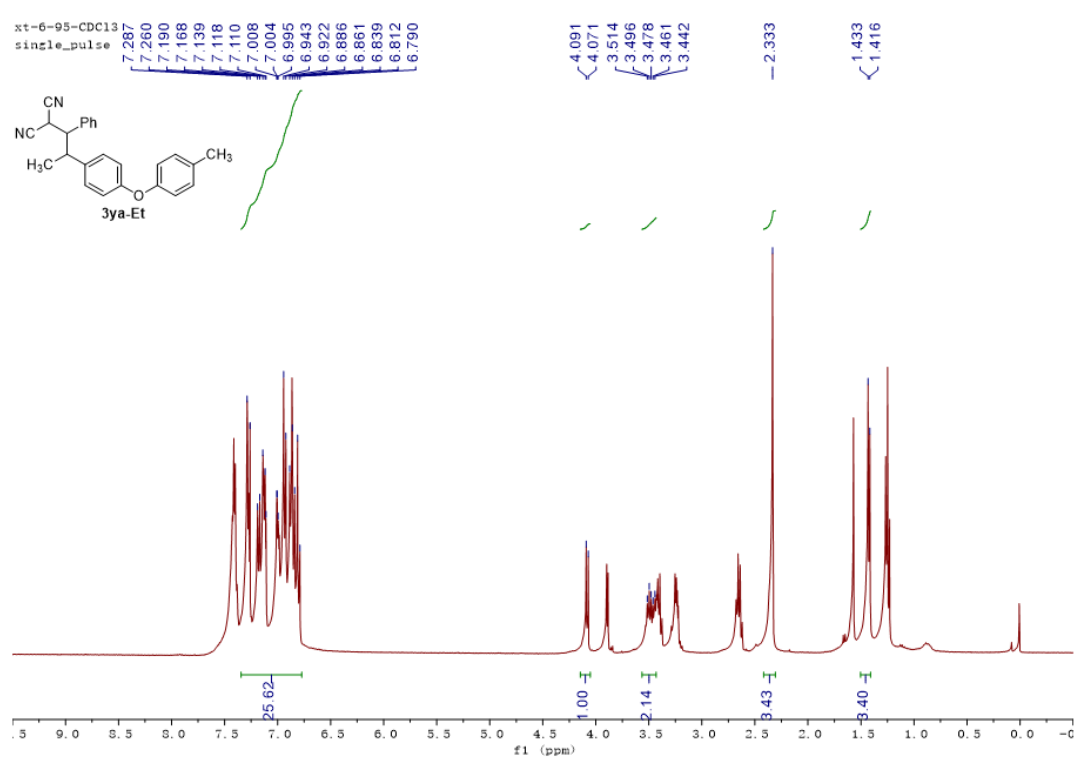

<sup>1</sup>H NMR (400 MHz, CDCl<sub>3</sub>) of **3ya-Et**

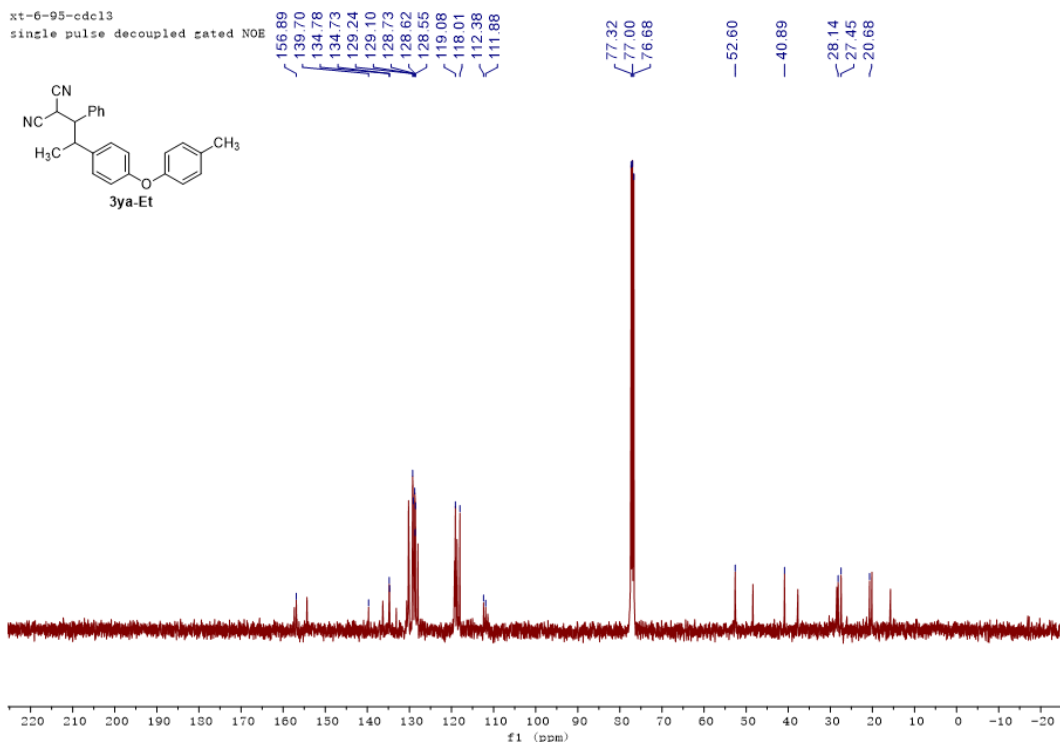

<sup>13</sup>C NMR (101 MHz, CDCl<sub>3</sub>) of **3ya-Et**

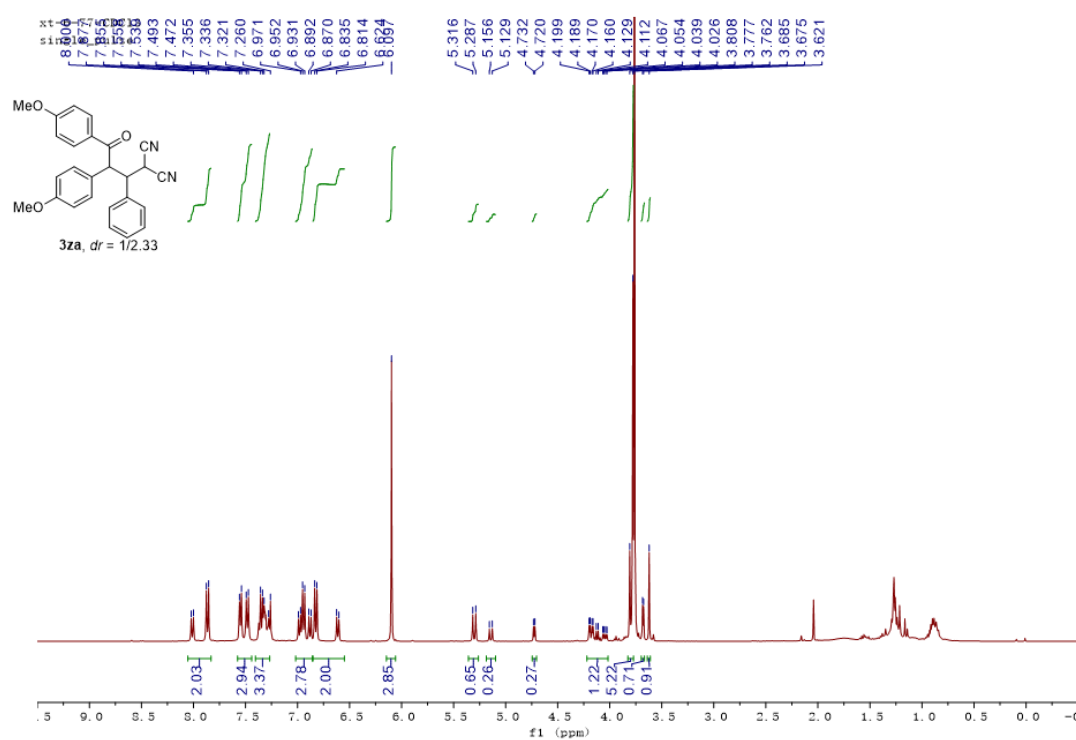

<sup>1</sup>H NMR (400 MHz, CDCl<sub>3</sub>) of **3za** with 1,3,5-trimethoxybenzene as internal standard

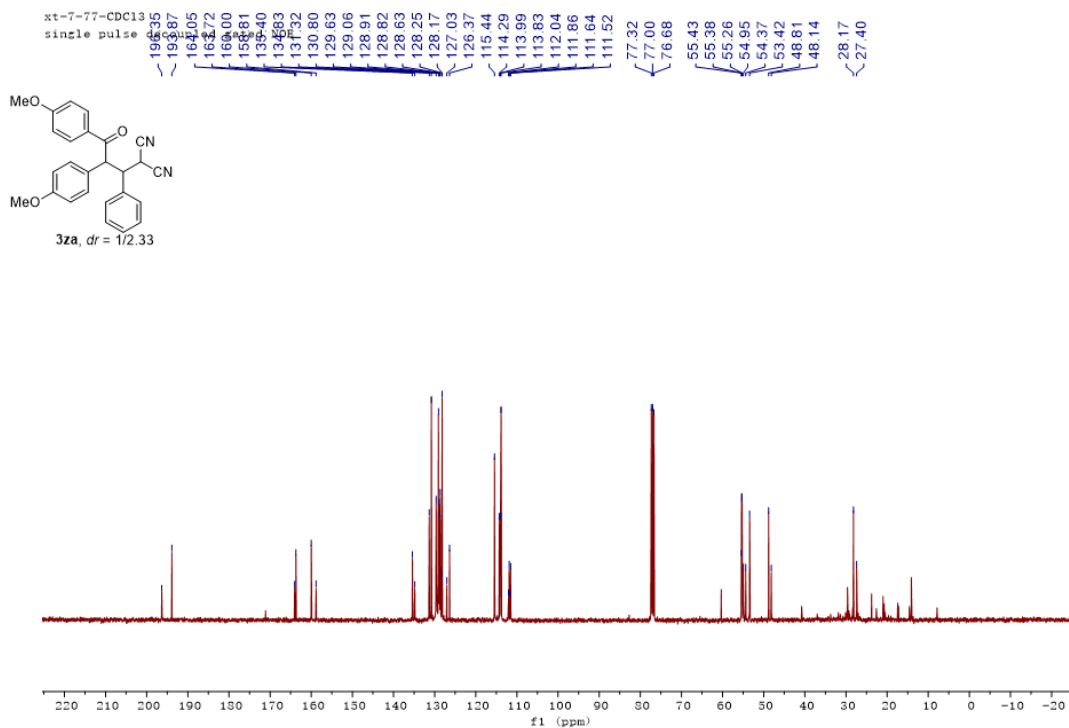

<sup>13</sup>C NMR (101 MHz, CDCl<sub>3</sub>) of **3za**

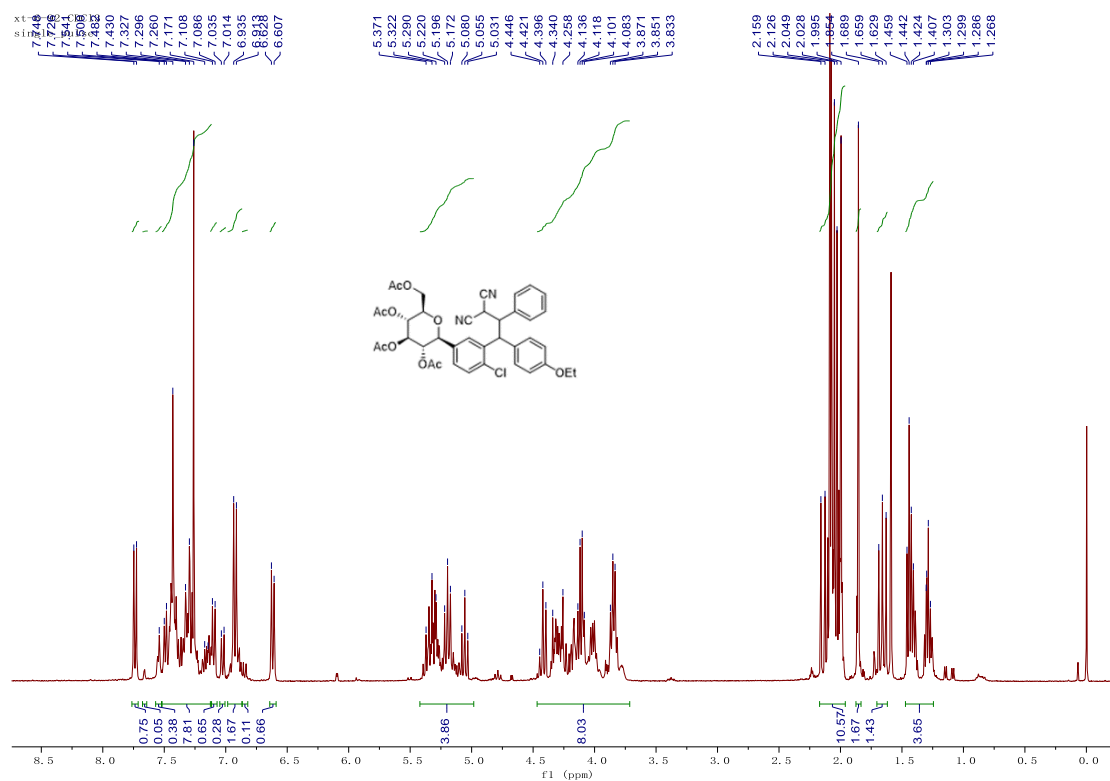

<sup>1</sup>H NMR (400 MHz, CDCl<sub>3</sub>) of **3aaa**

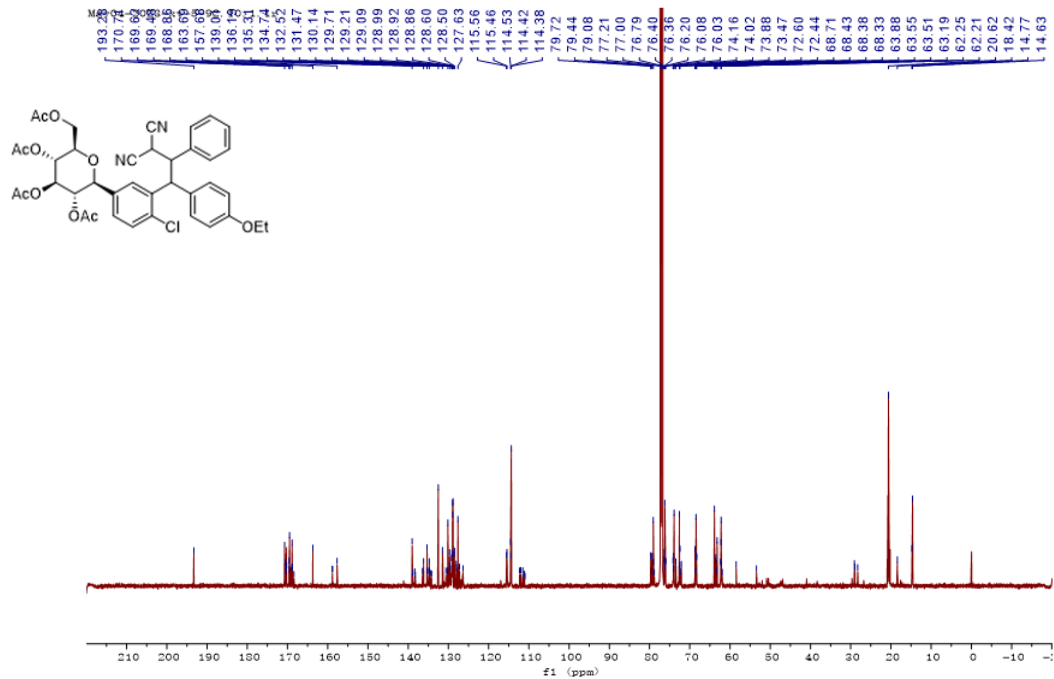

<sup>13</sup>C NMR (151 MHz, CDCl<sub>3</sub>) of **3aaa**

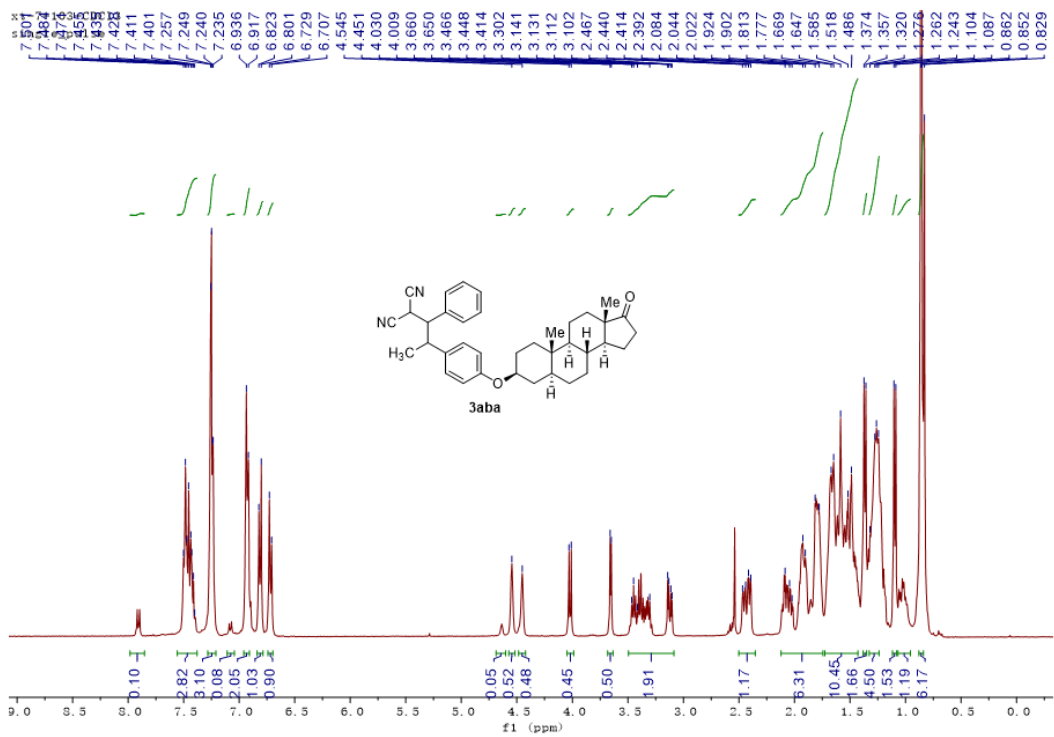

<sup>1</sup>H NMR (400 MHz, CDCl<sub>3</sub>) of **3aba**

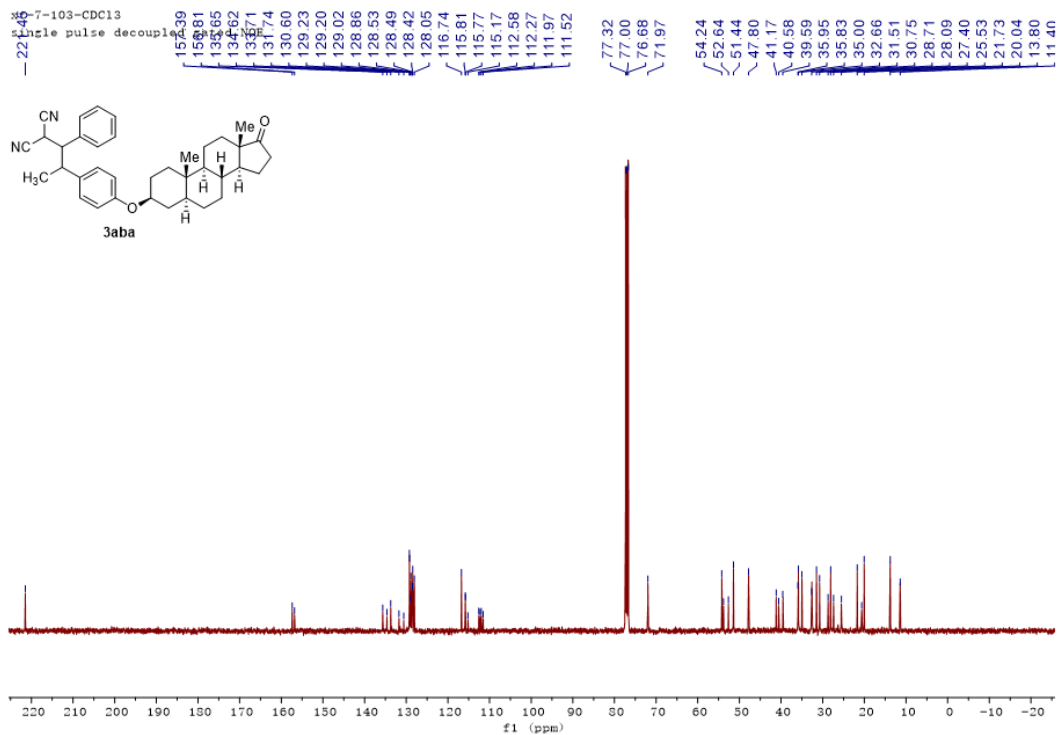

<sup>13</sup>C NMR (101 MHz, CDCl<sub>3</sub>) of **3aba**

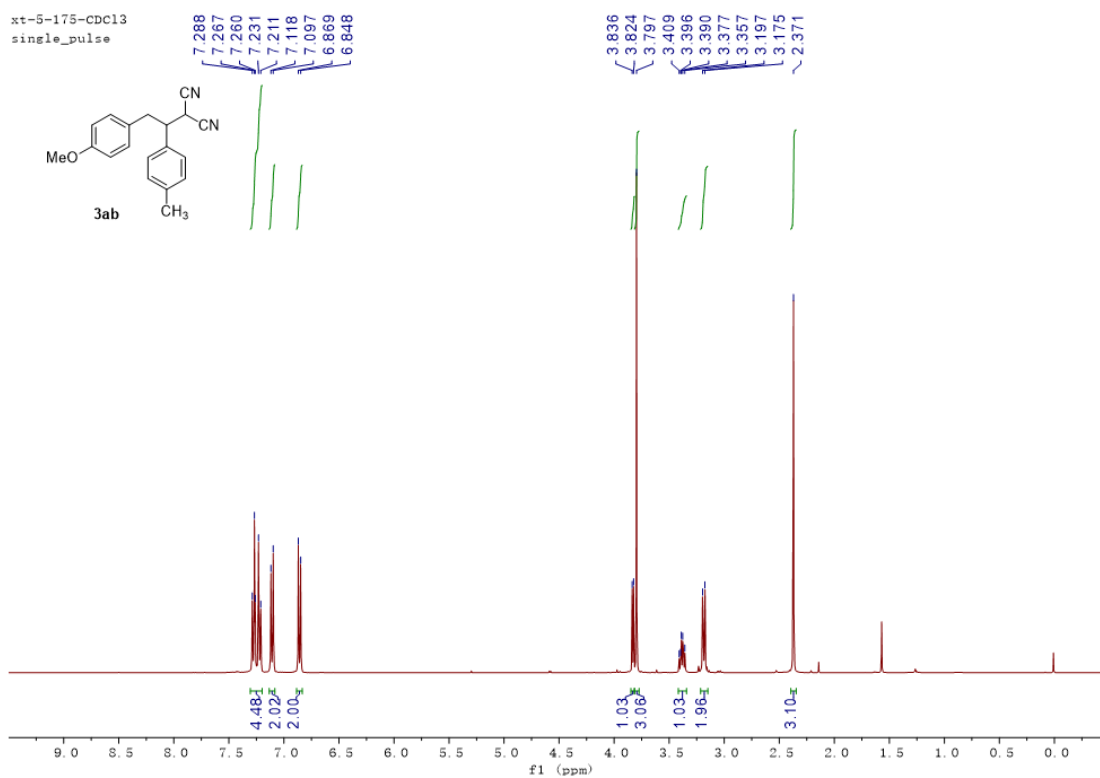

<sup>1</sup>H NMR (400 MHz, CDCl<sub>3</sub>) of **3ab**

xt-5-175-CDCl3  
single pulse decoupled gated NOE

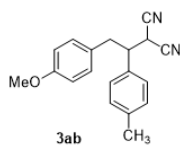

158.84  
138.78  
133.38  
129.88  
129.76  
128.57  
127.82  
114.41  
112.21  
111.52  
77.32  
77.00  
76.68  
55.22  
48.08  
37.58  
28.47  
21.10

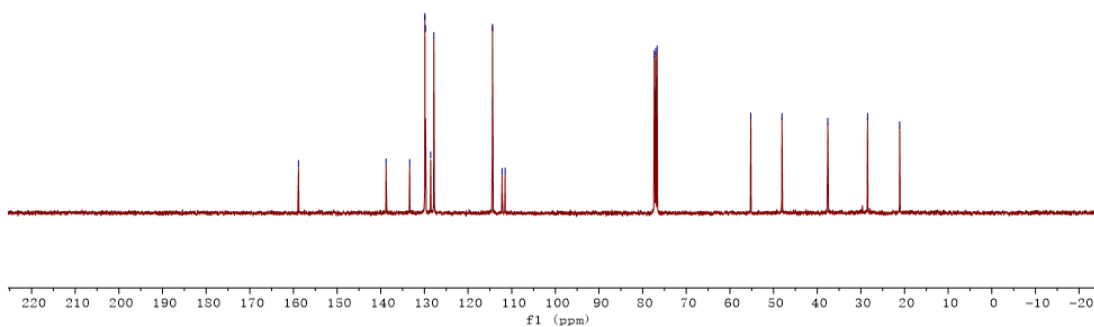

<sup>13</sup>C NMR (101 MHz, CDCl<sub>3</sub>) of **3ab**

xt-5-139-CDCl3  
single\_pulse

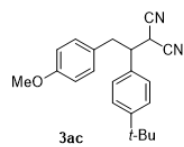

7.456  
7.435  
7.357  
7.337  
7.260  
7.151  
7.130  
6.891  
6.870  
3.850  
3.839  
3.806  
3.430  
3.411  
3.398  
3.379  
3.213  
3.193

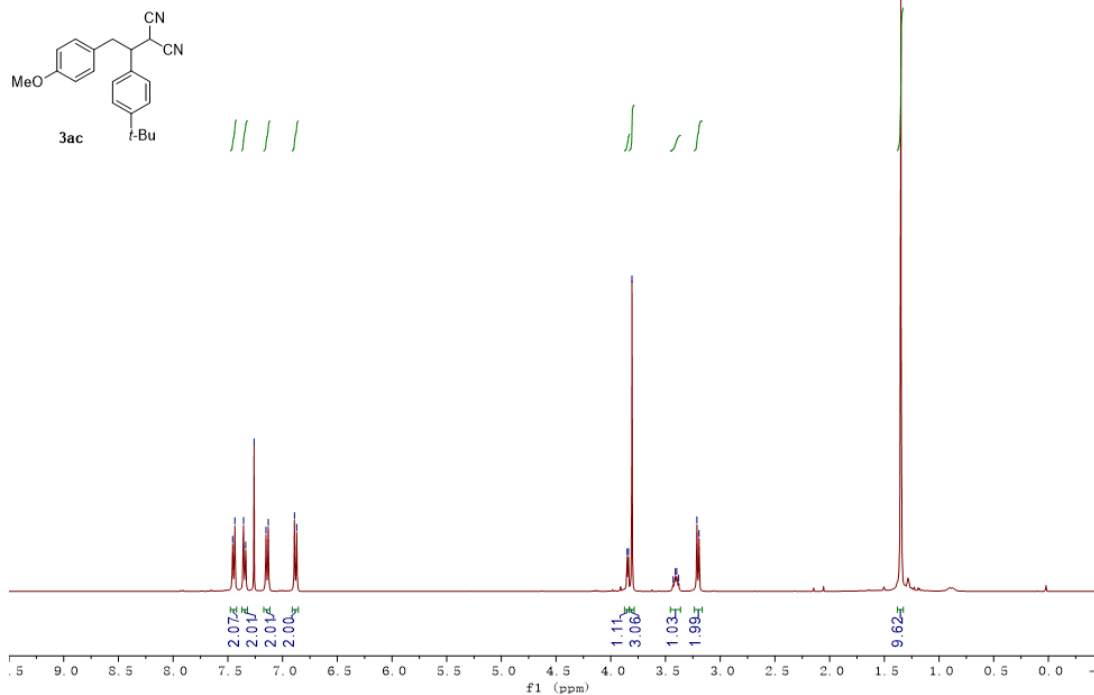

<sup>1</sup>H NMR (400 MHz, CDCl<sub>3</sub>) of **3ac**

xt-5-139

single pulse decoupled gated NOE

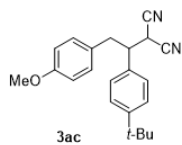

158.90  
151.90  
133.38  
129.89  
128.65  
127.63  
126.00  
114.47  
112.24  
111.50

77.32  
77.00  
76.88

55.24  
47.97

37.53  
34.58  
31.20  
28.28

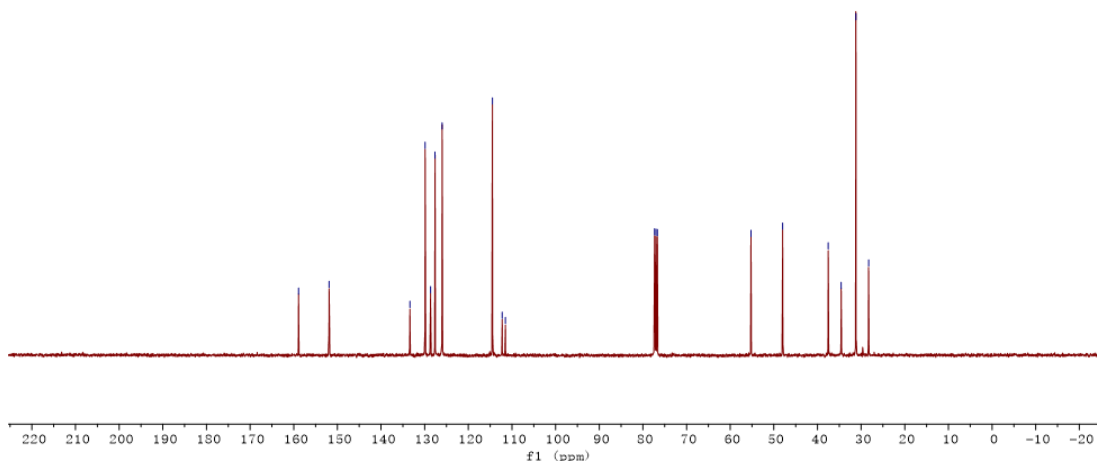

<sup>13</sup>C NMR (101 MHz, CDCl<sub>3</sub>) of **3ac**

xt-5-144-CDCl3  
single\_pulse

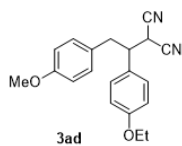

7.302  
7.280  
7.260  
7.107  
7.085  
6.929  
6.907  
6.862  
6.840

4.068  
4.050  
4.033  
4.015  
3.818  
3.805  
3.793  
3.390  
3.370  
3.358  
3.338  
3.175  
3.155

1.442  
1.424  
1.407

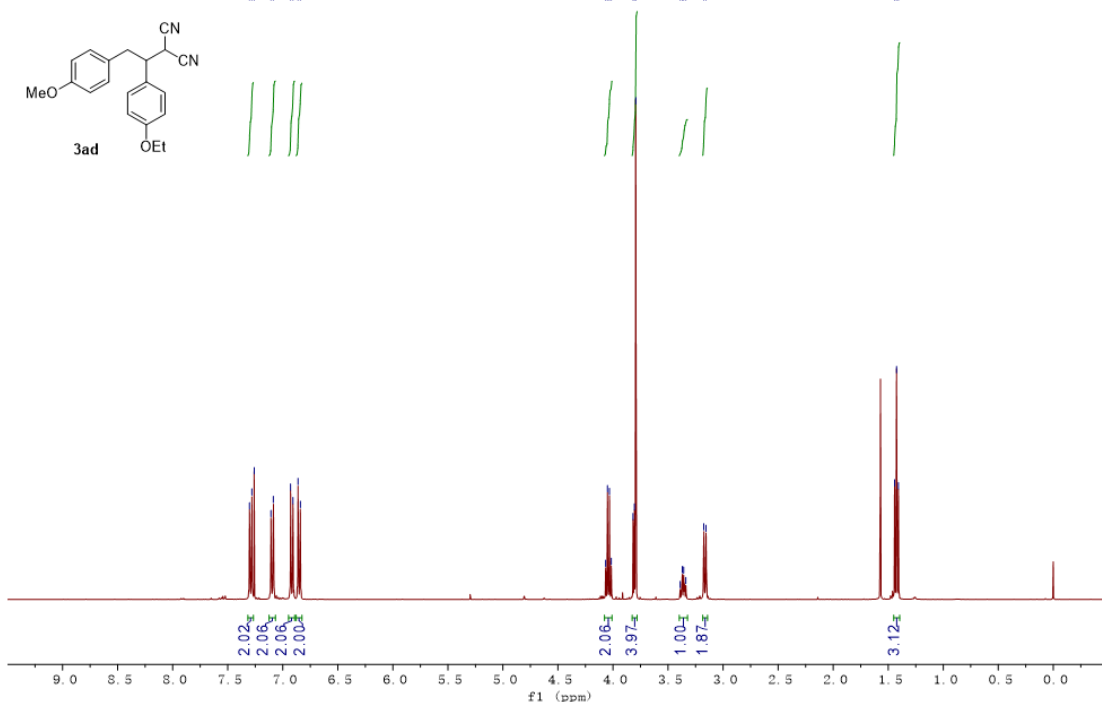

<sup>1</sup>H NMR (400 MHz, CDCl<sub>3</sub>) of **3ad**

XT-5-144-cdcl3

single pulse decoupled gated NOE

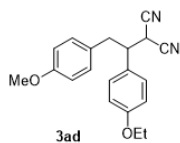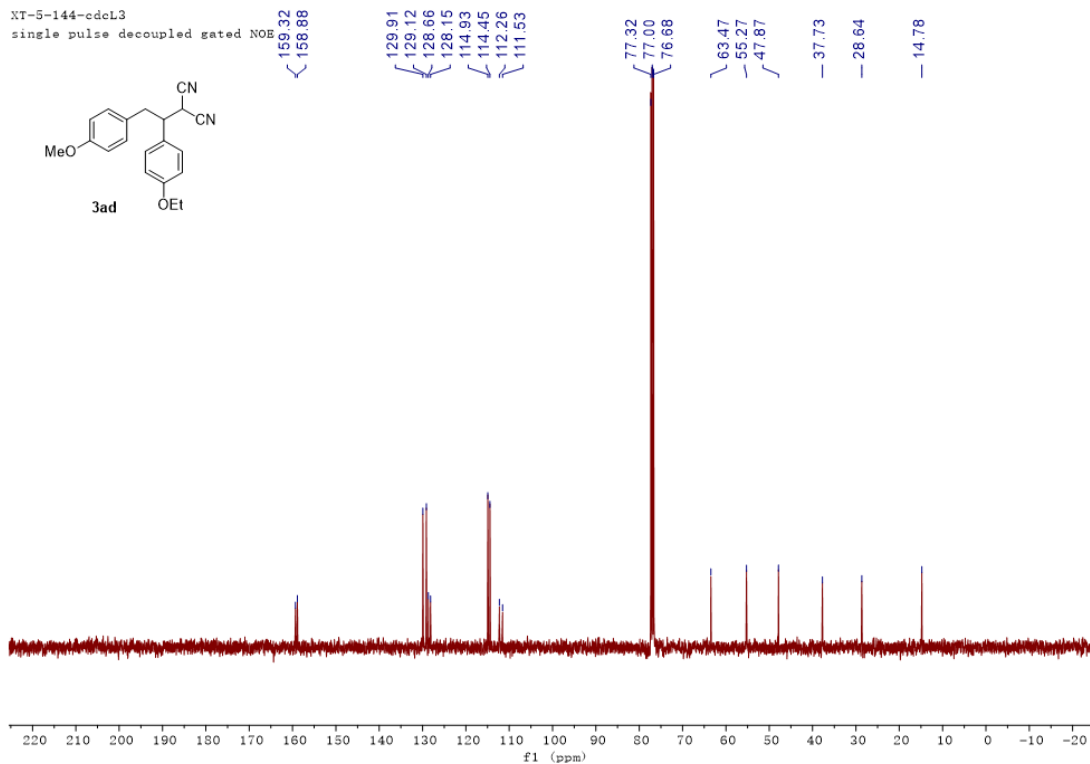

<sup>13</sup>C NMR (101 MHz, CDCl<sub>3</sub>) of 3ad

xt-5-172-cdcl3  
single\_pulse

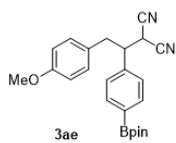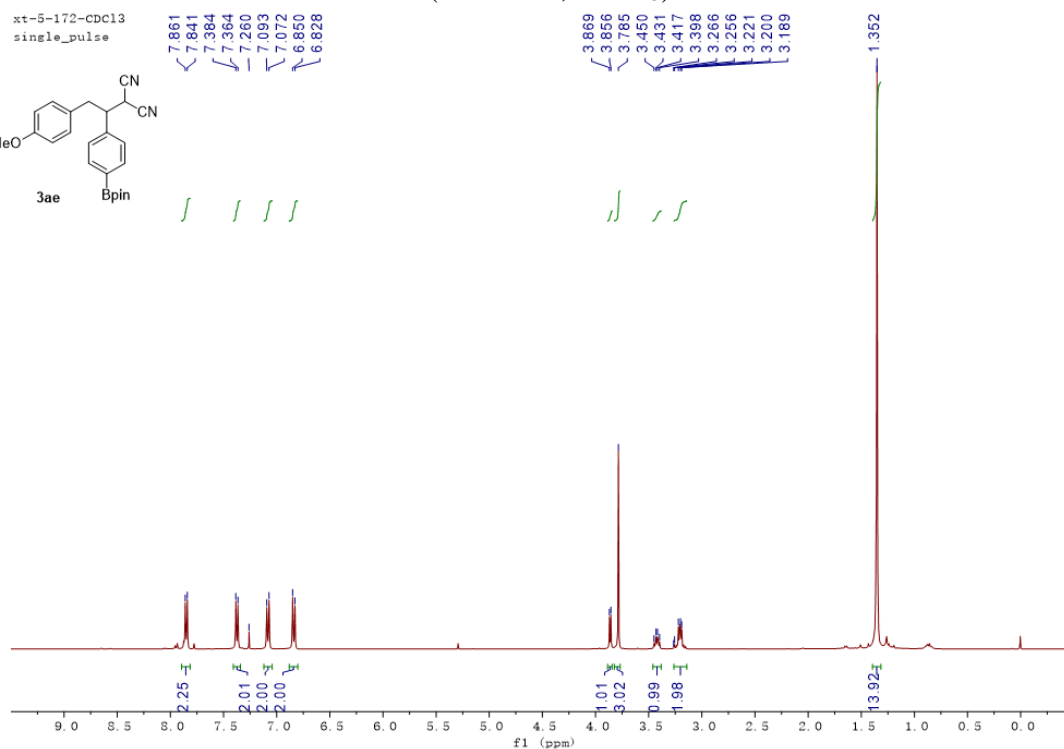

<sup>1</sup>H NMR (400 MHz, CDCl<sub>3</sub>) of 3ae



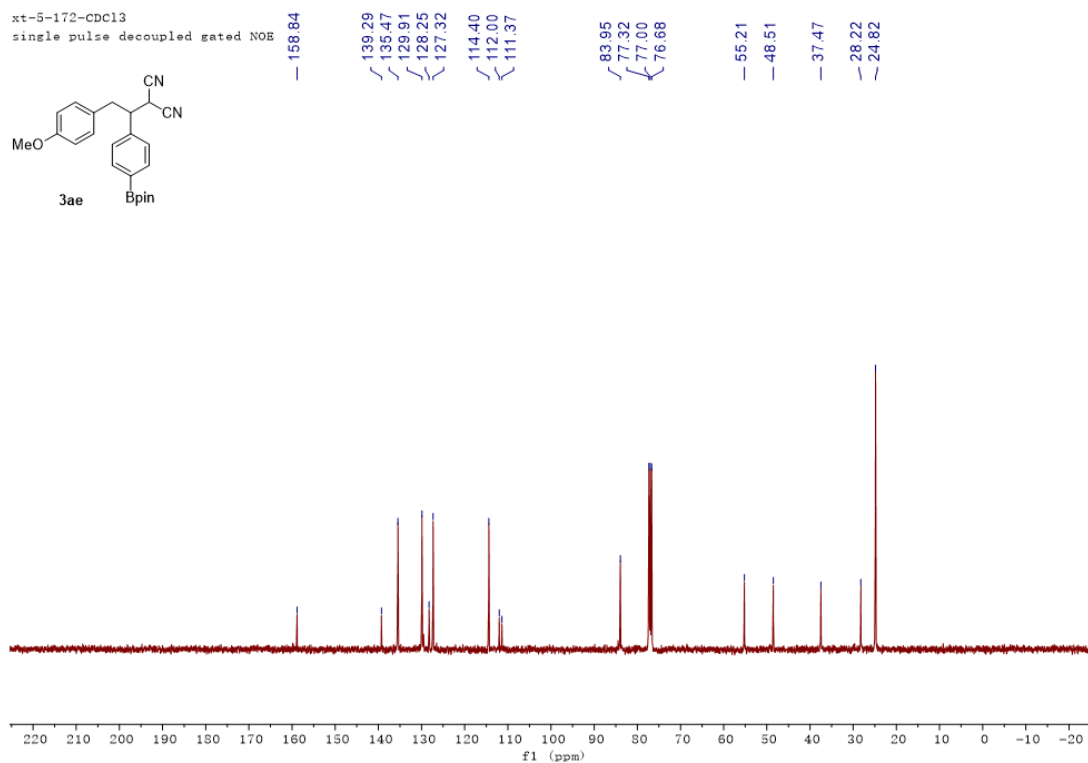

$^{13}\text{C}$  NMR (101 MHz,  $\text{CDCl}_3$ ) of **3ae**

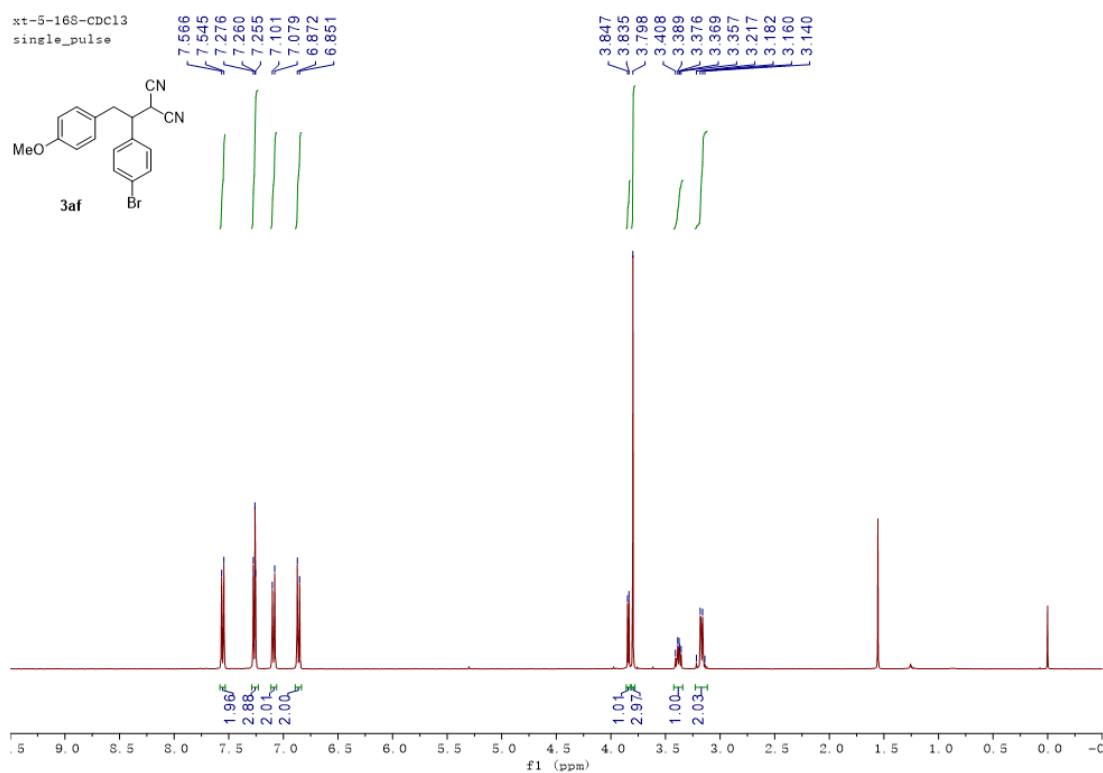

$^1\text{H}$  NMR (400 MHz,  $\text{CDCl}_3$ ) of **3af**

xt-5-168-CDCl3

single pulse decoupled gated NOE

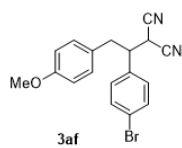

158.96  
135.33  
132.27  
129.85  
129.65  
127.92  
123.11  
114.51  
111.89  
111.20  
77.32  
77.00  
76.68  
55.23  
47.83  
37.44  
28.13

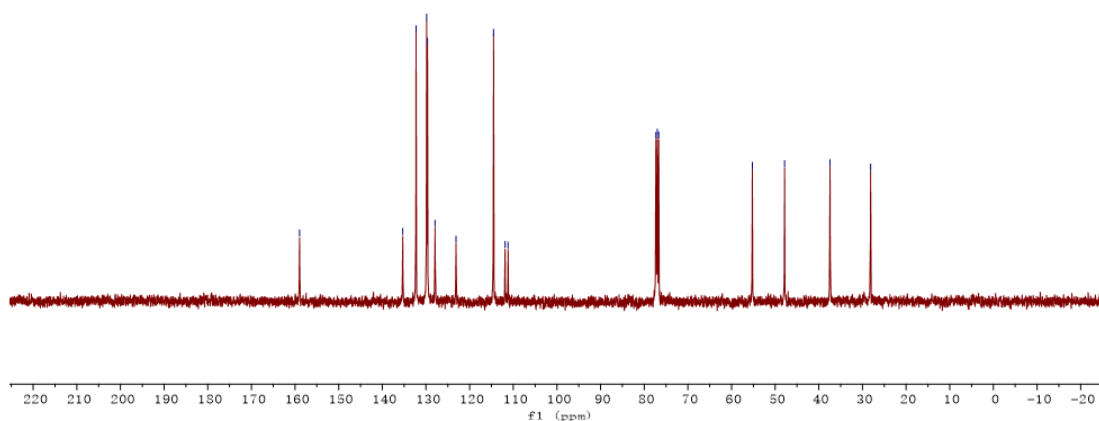

$^{13}\text{C}$  NMR (101 MHz,  $\text{CDCl}_3$ ) of **3af**

xt-5-164-CDCl3

single\_pulse

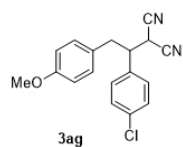

7.412  
7.391  
7.337  
7.315  
7.260  
7.102  
7.080  
6.872  
6.850  
3.849  
3.836  
3.798  
3.421  
3.382  
3.369  
3.184  
3.177  
3.163  
3.159

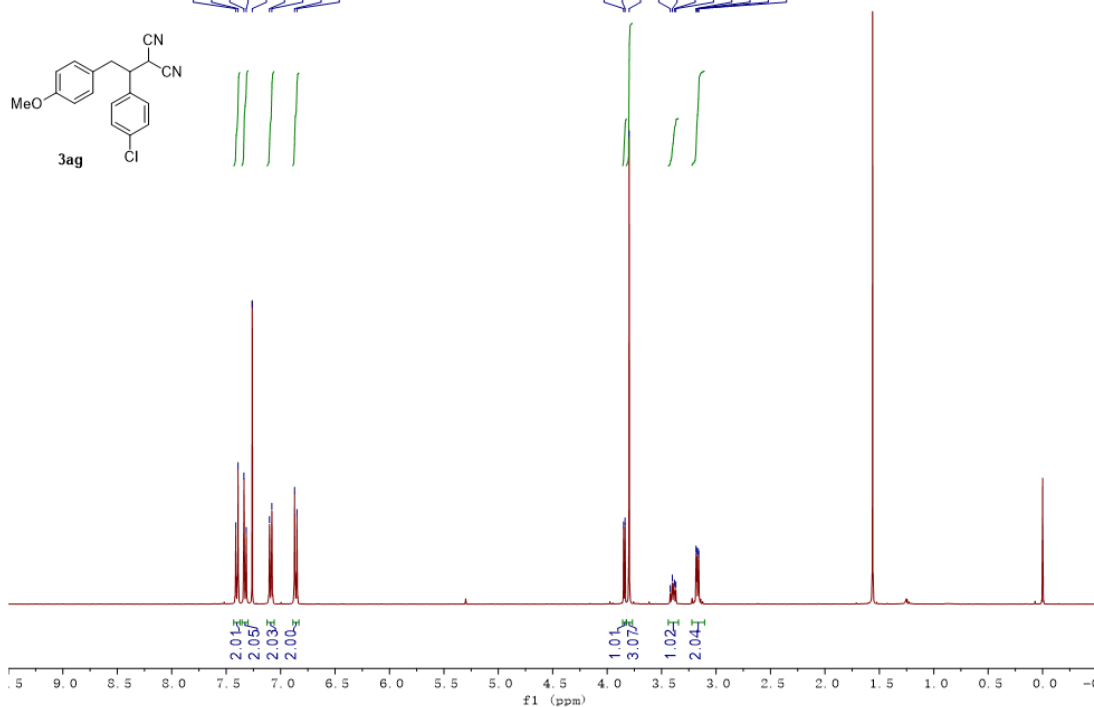

$^1\text{H}$  NMR (400 MHz,  $\text{CDCl}_3$ ) of **3ag**

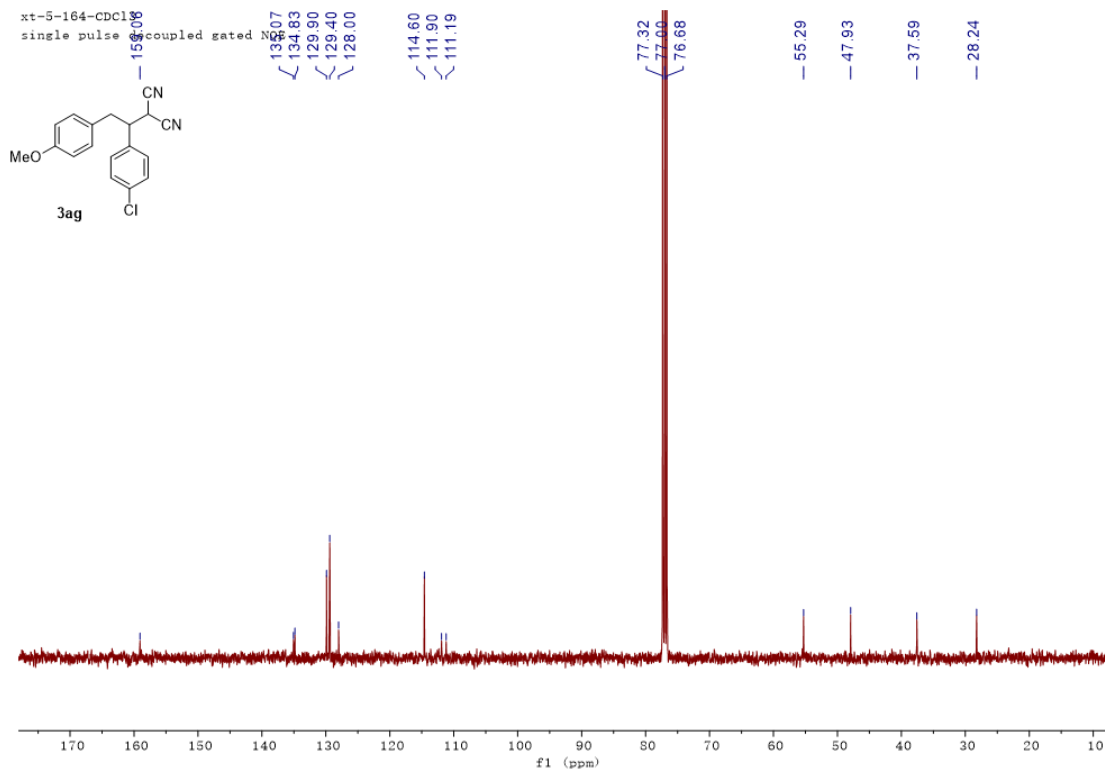

<sup>13</sup>C NMR (101 MHz, CDCl<sub>3</sub>) of **3ag**

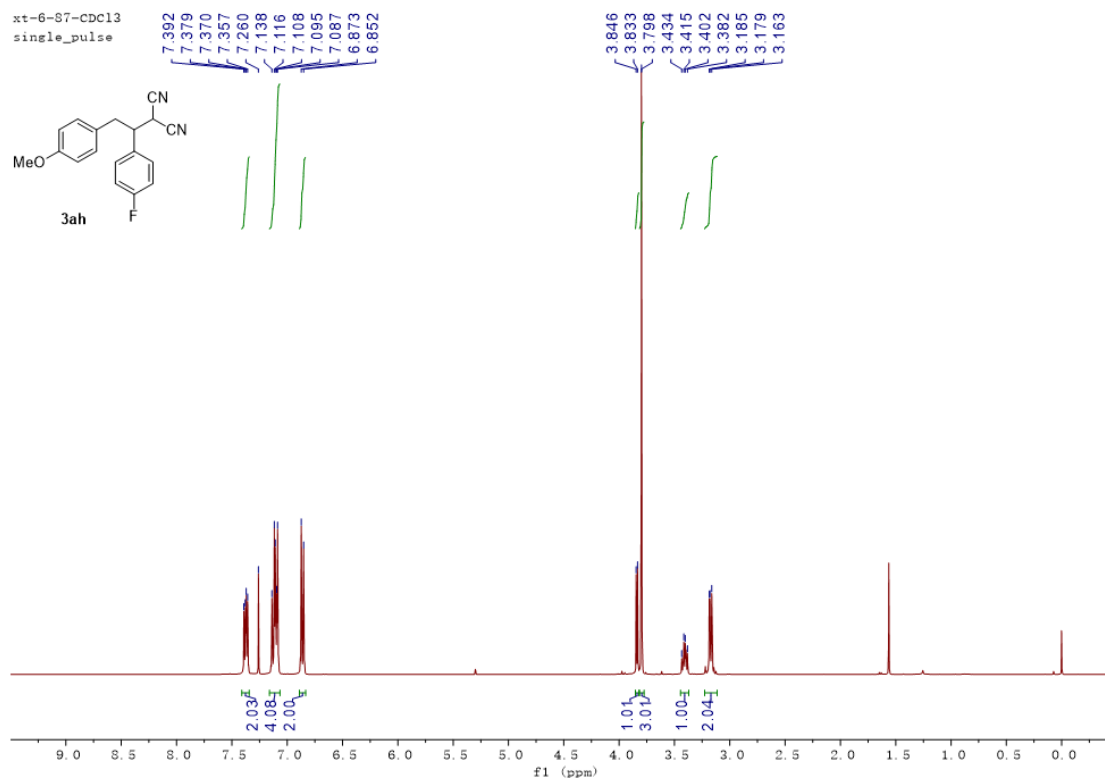

<sup>1</sup>H NMR (400 MHz, CDCl<sub>3</sub>) of **3ah**

xt-6-87-CDCl3  
single\_pulse

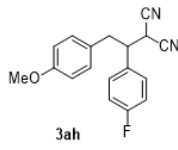

—112.23

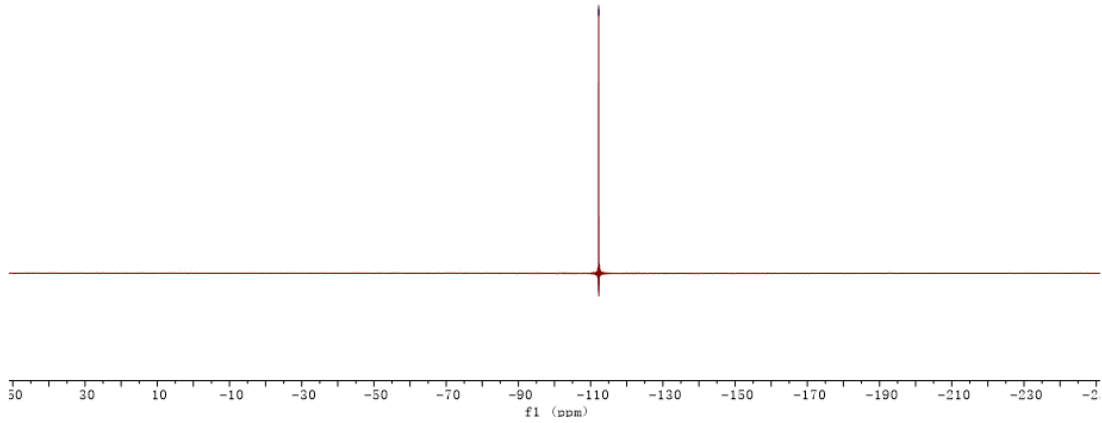

<sup>19</sup>F NMR (376 MHz, CDCl<sub>3</sub>) of **3ah**

xt-6-87-13C-CDCl3  
single pulse decoupled gated NMR

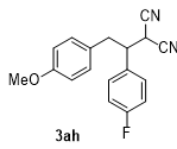

164.11  
161.64  
158.96  
132.16  
129.86  
129.72  
128.13  
118.25  
116.04  
114.50  
112.00  
111.27  
77.32  
77.00  
76.68  
55.24  
47.72  
37.67  
28.38

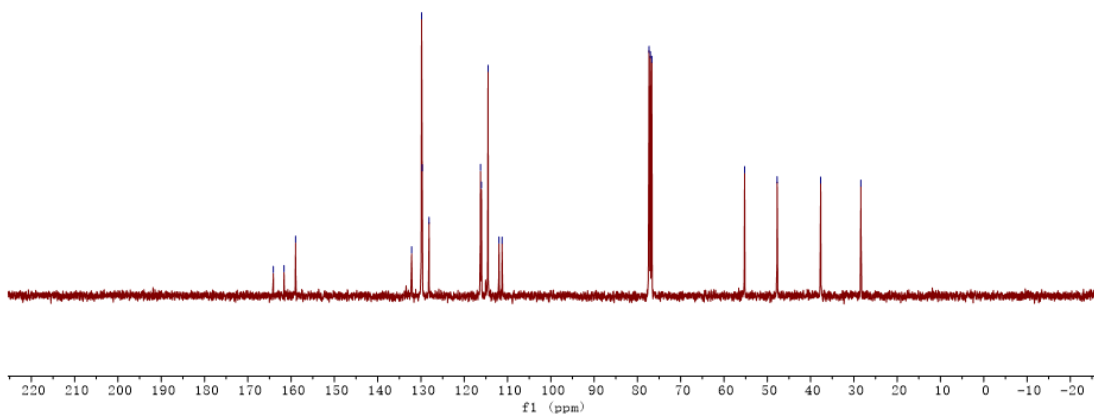

<sup>13</sup>C NMR (101 MHz, CDCl<sub>3</sub>) of **3ah**

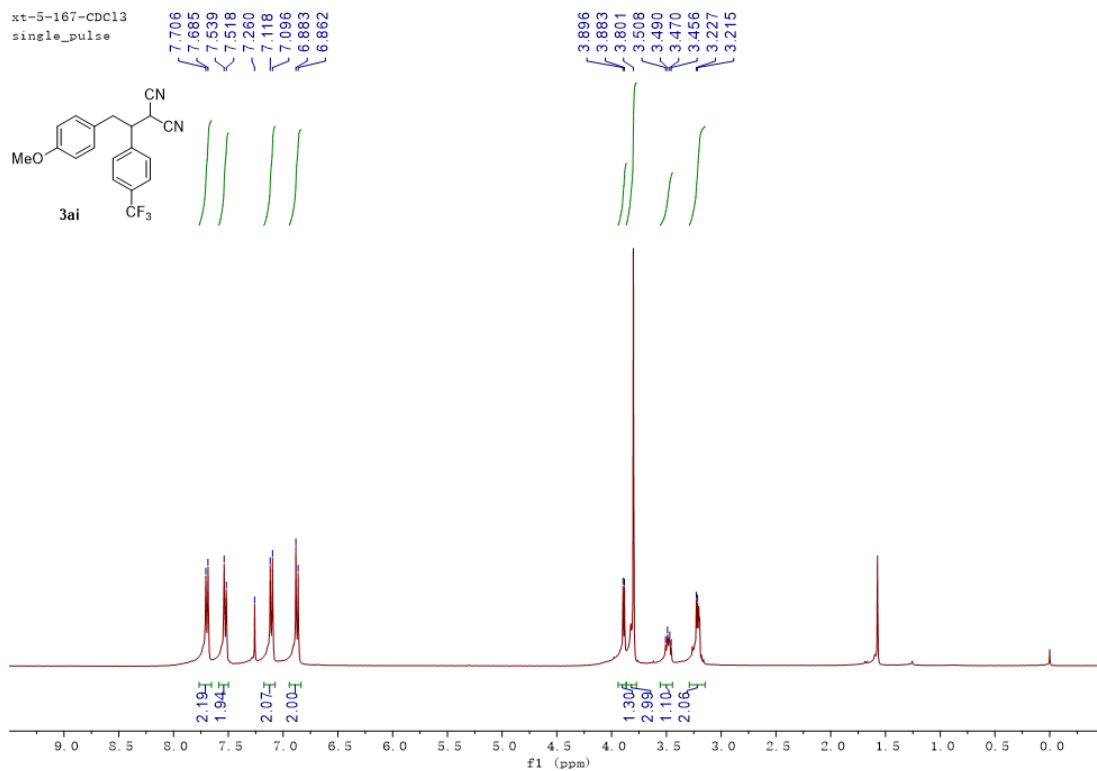

<sup>1</sup>H NMR (400 MHz, CDCl<sub>3</sub>) of **3ai**

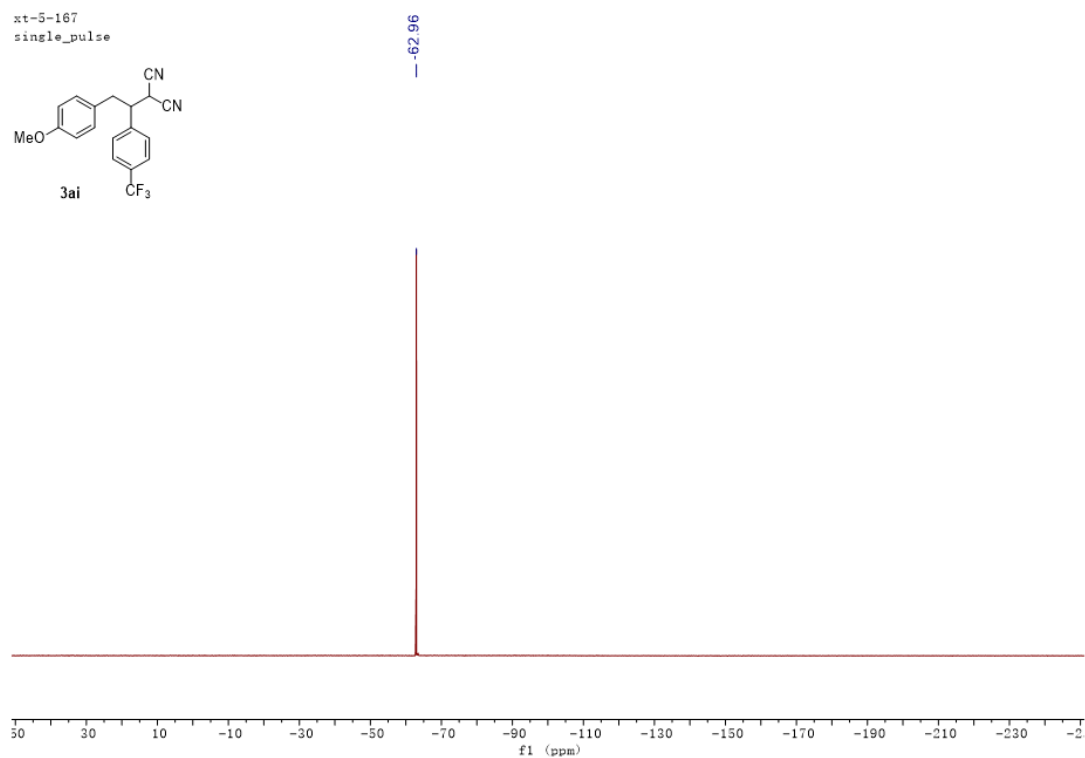

<sup>19</sup>F NMR (376 MHz, CDCl<sub>3</sub>) of **3ai**



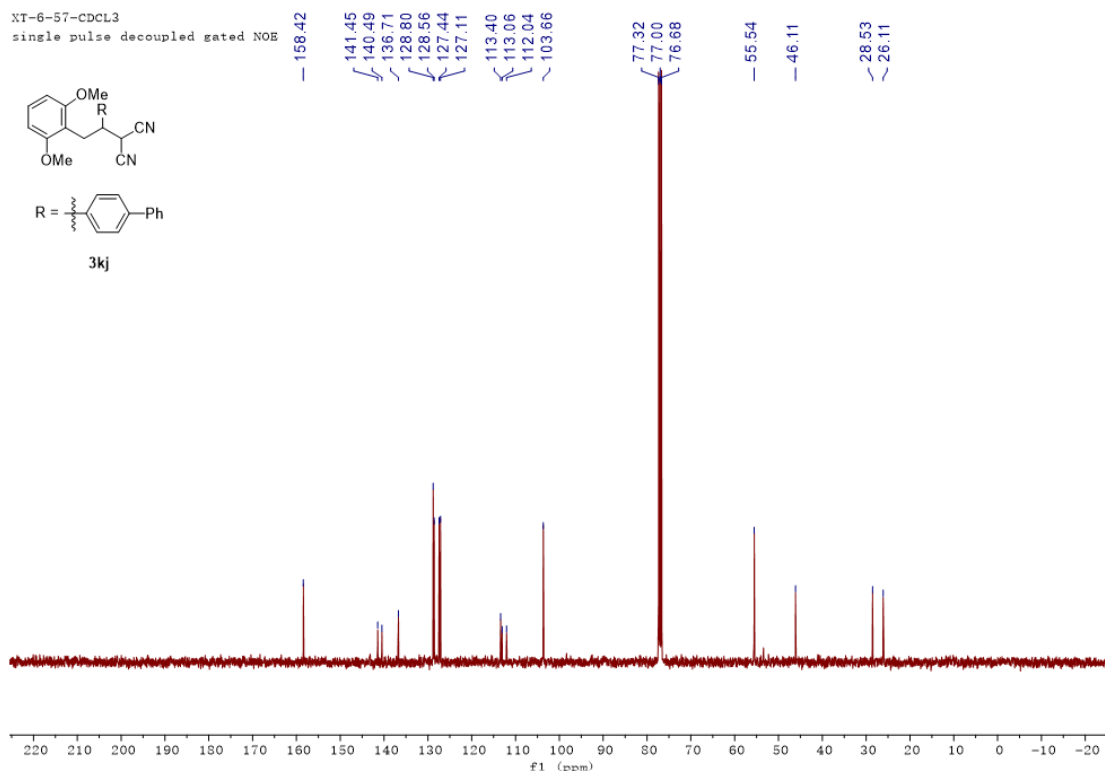

<sup>13</sup>C NMR (101 MHz, CDCl<sub>3</sub>) of **3kj**

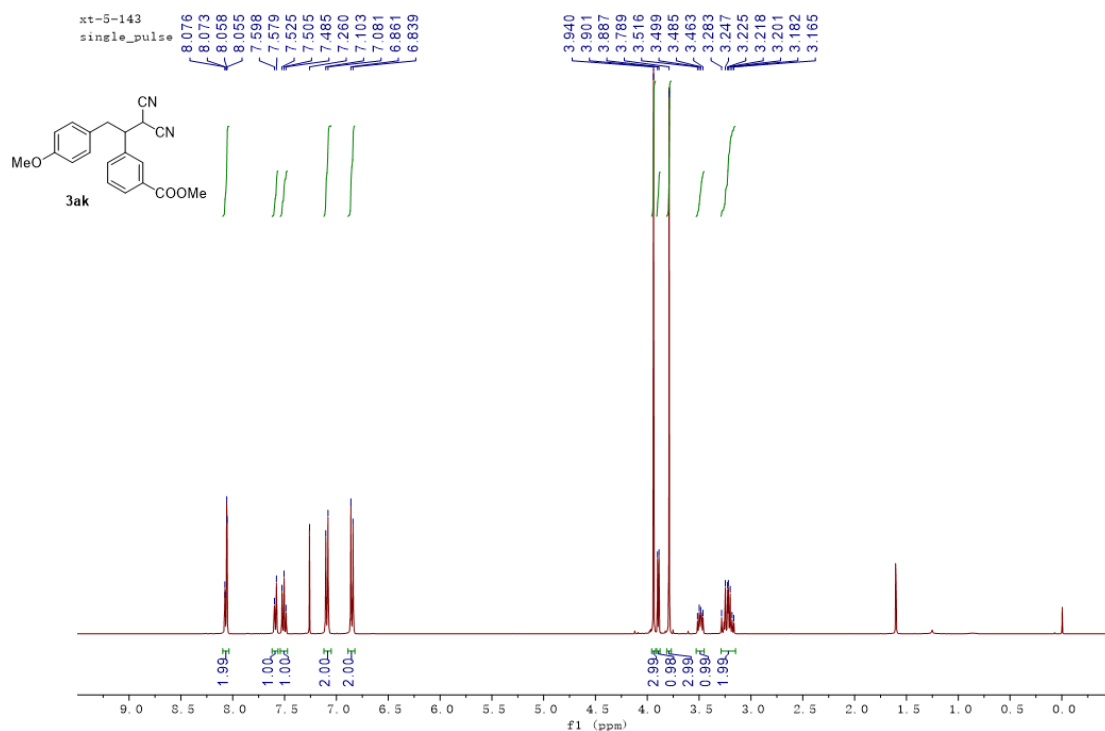

<sup>1</sup>H NMR (400 MHz, CDCl<sub>3</sub>) of **3ak**

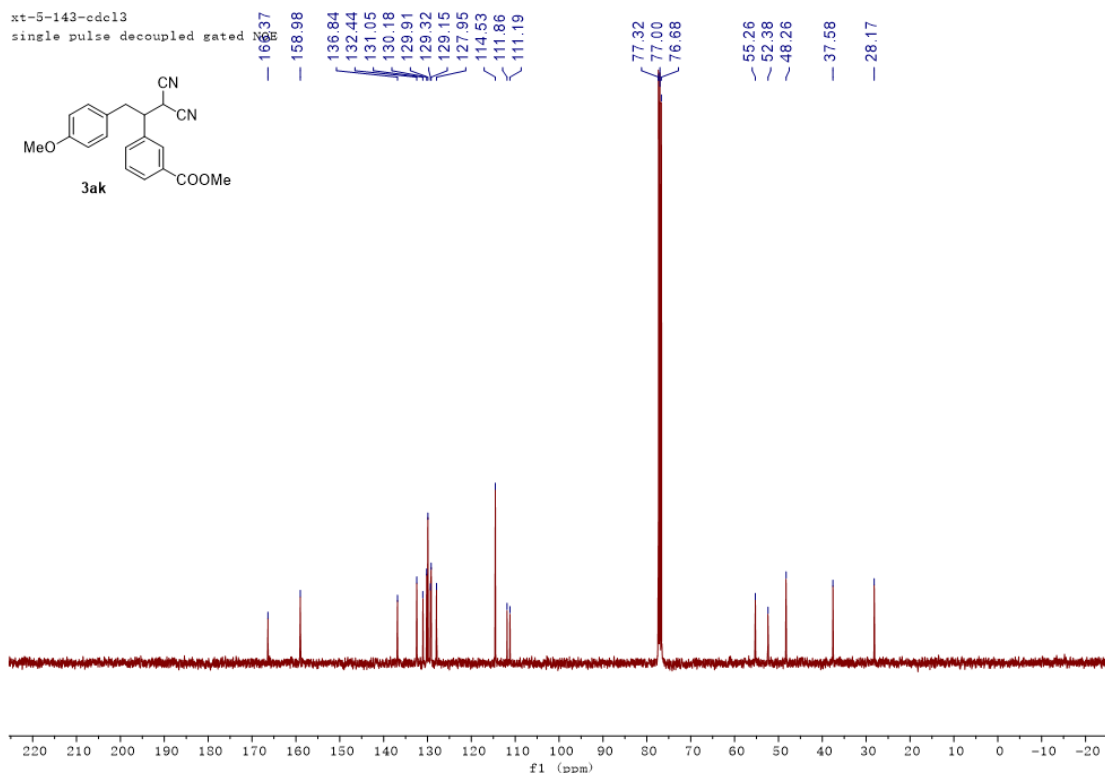

$^{13}\text{C}$  NMR (101 MHz,  $\text{CDCl}_3$ ) of **3ak**

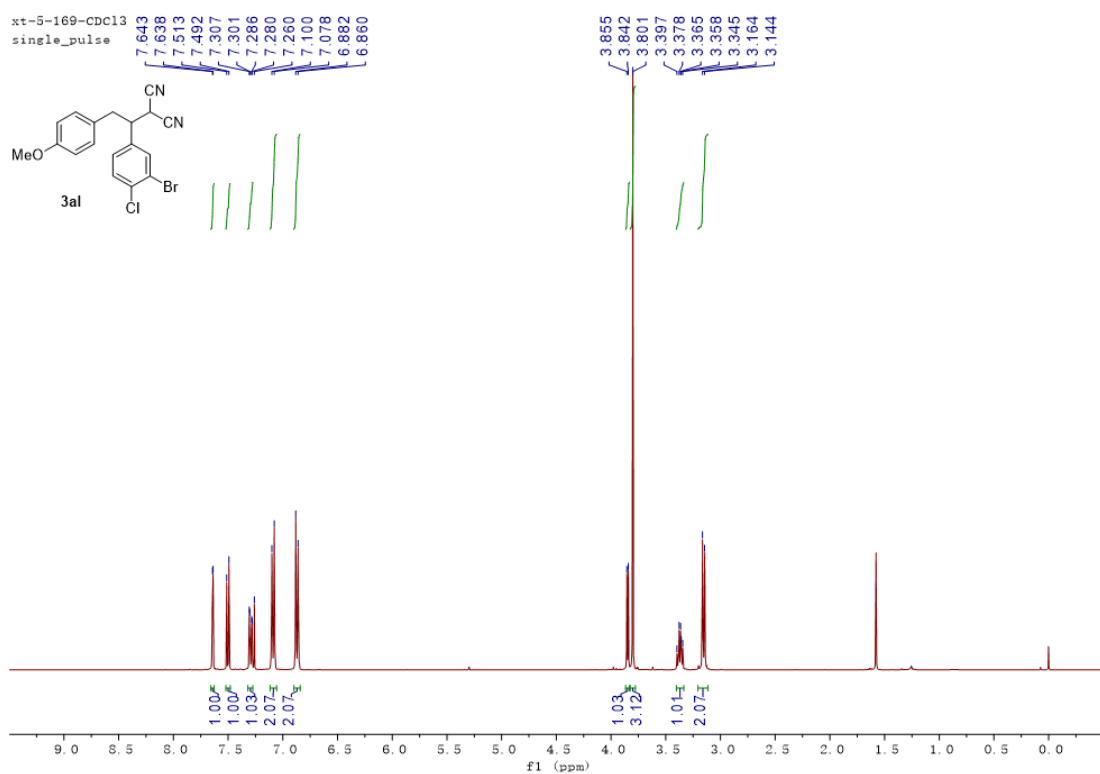

$^1\text{H}$  NMR (400 MHz,  $\text{CDCl}_3$ ) of **3al**



xt-5-169-CDCl<sub>3</sub>

single pulse decoupled gated NOE

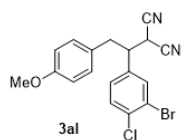

159.11  
136.56  
135.39  
133.30  
130.94  
129.86  
127.97  
127.53  
123.26  
114.65  
111.66  
110.96  
77.32  
77.00  
76.68  
55.28  
47.41  
37.45  
28.01

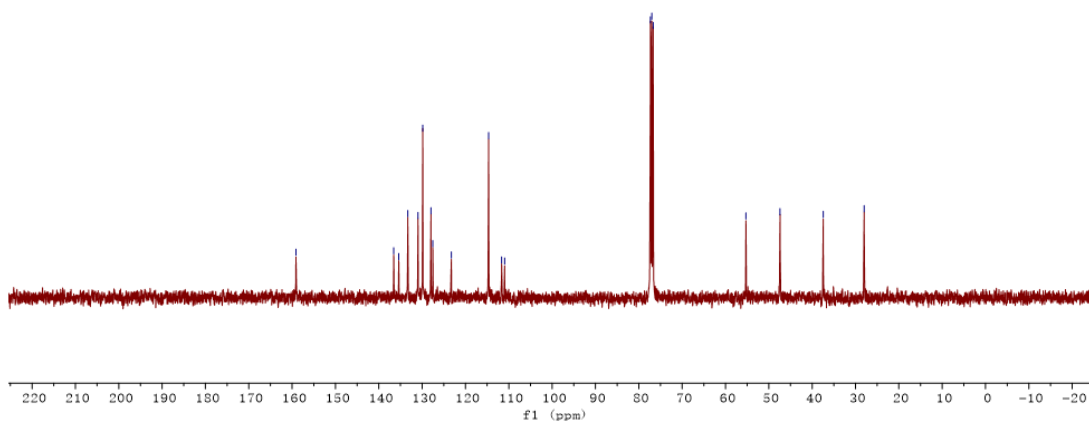

<sup>13</sup>C NMR (101 MHz, CDCl<sub>3</sub>) of **3al**

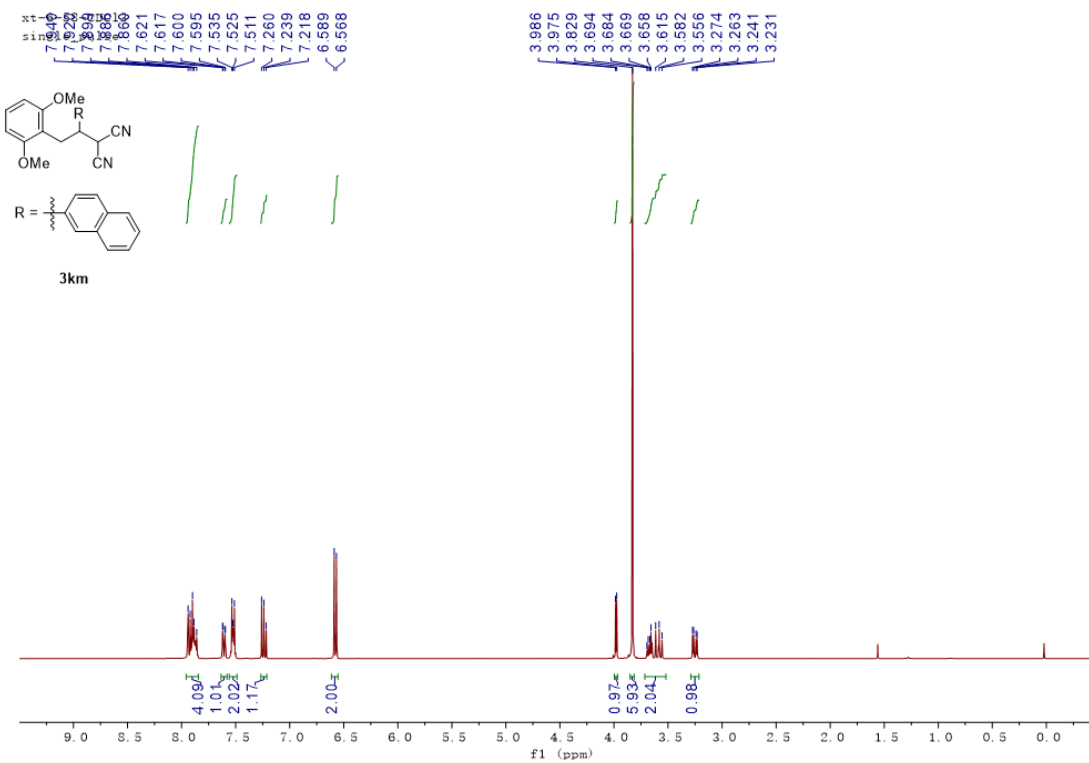

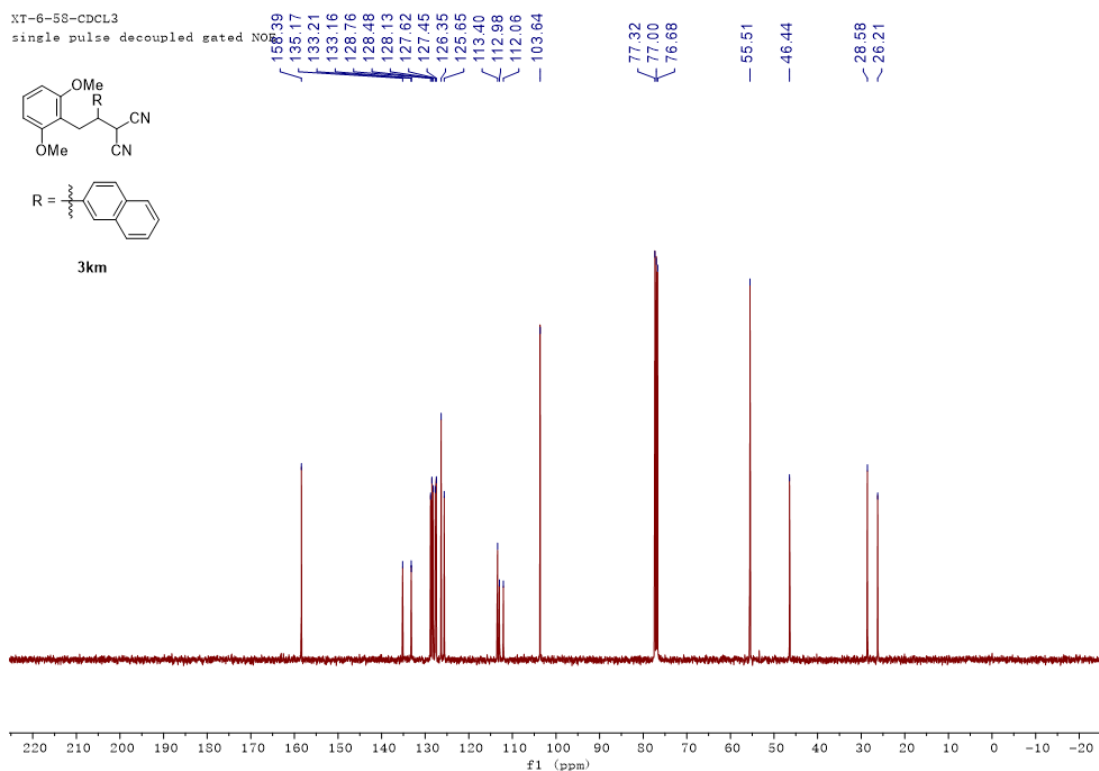

<sup>13</sup>C NMR (101 MHz, CDCl<sub>3</sub>) of **3km**

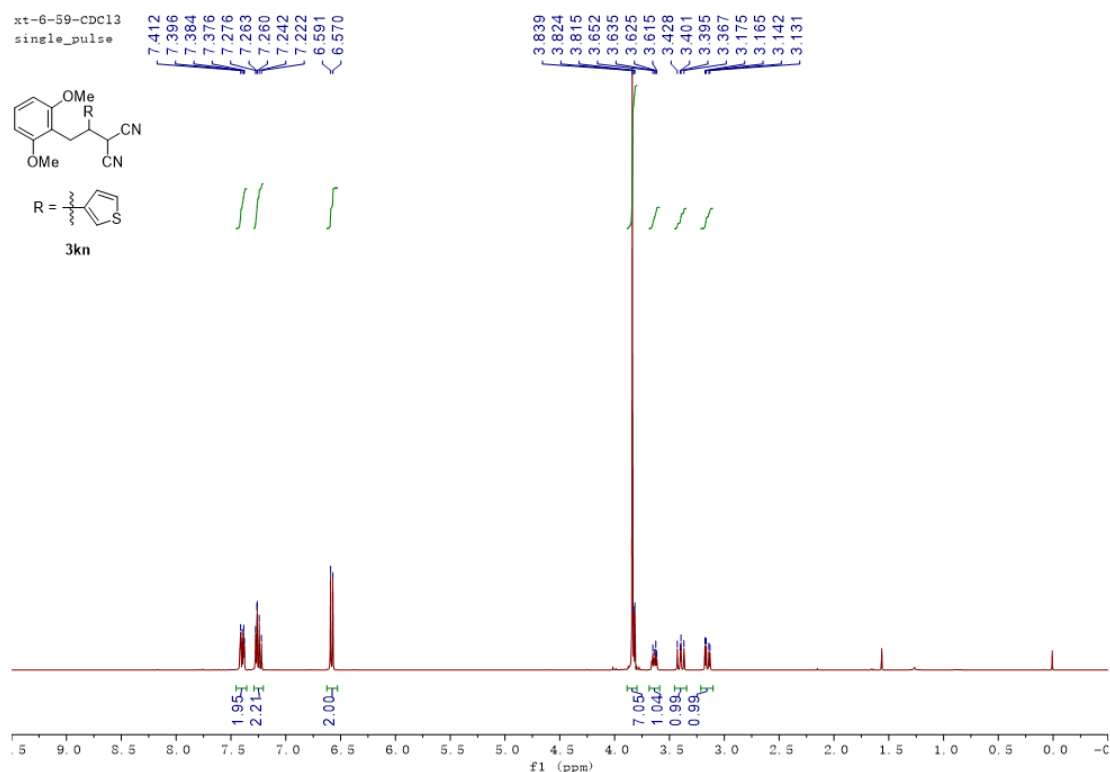

<sup>1</sup>H NMR (400 MHz, CDCl<sub>3</sub>) of **3kn**



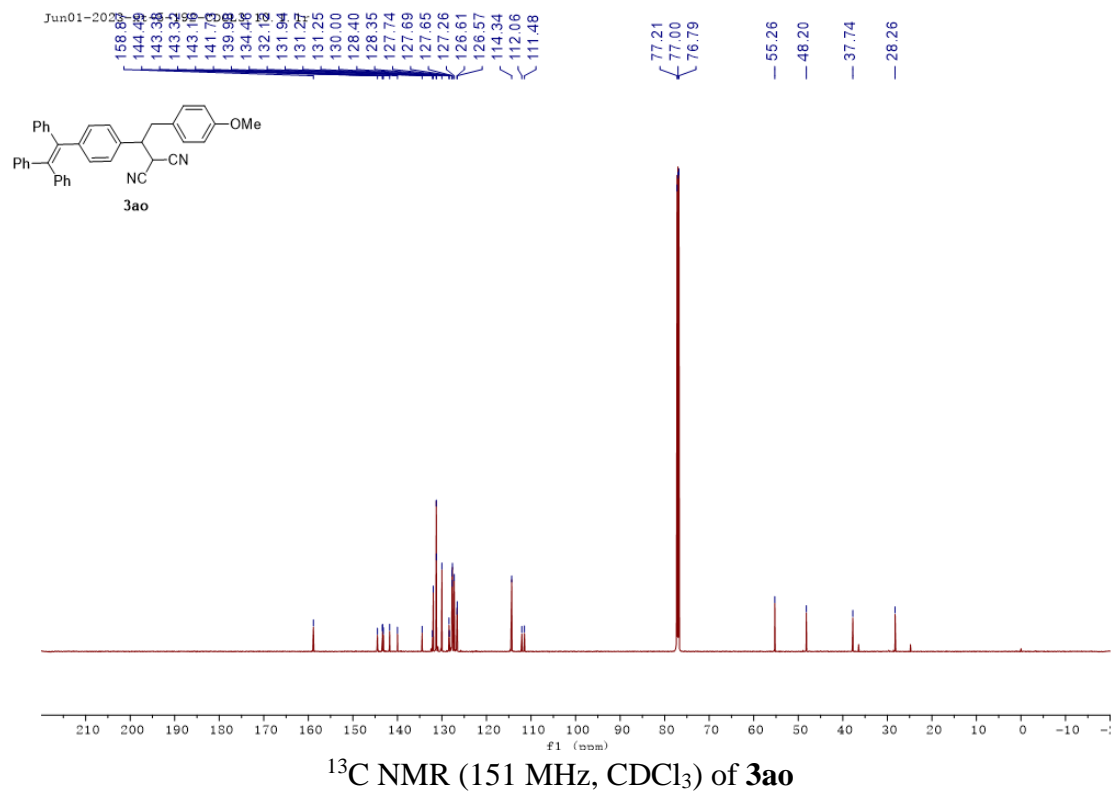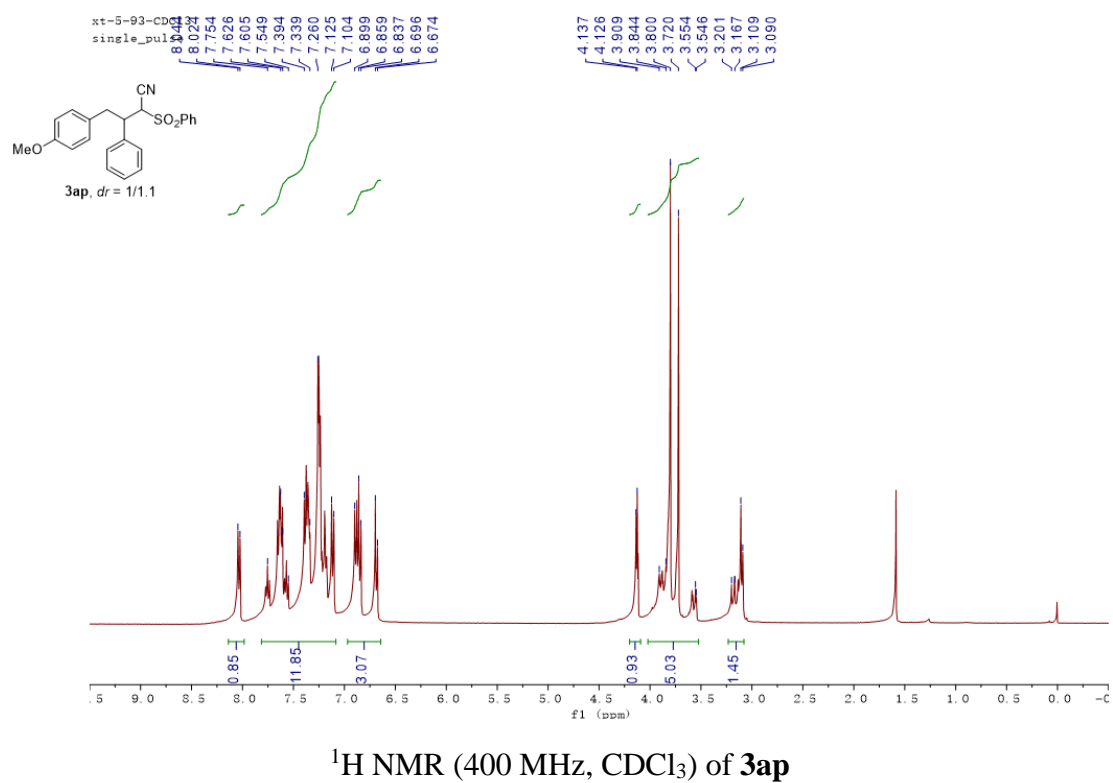

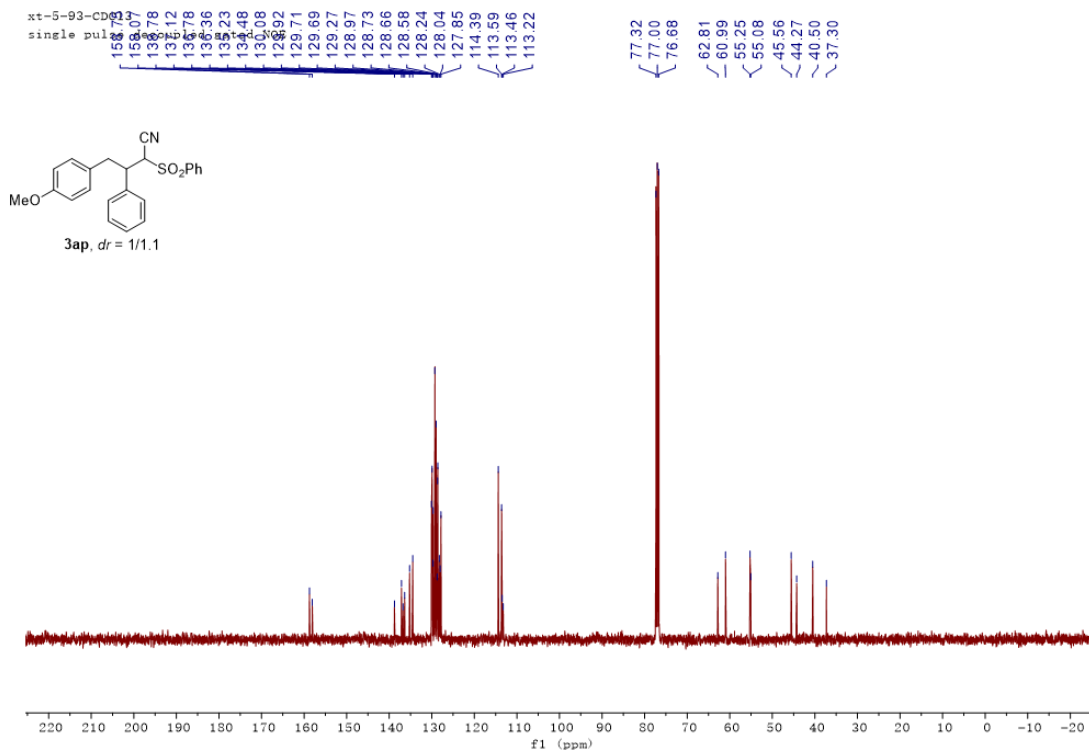

<sup>13</sup>C NMR (101 MHz, CDCl<sub>3</sub>) of **3ap**

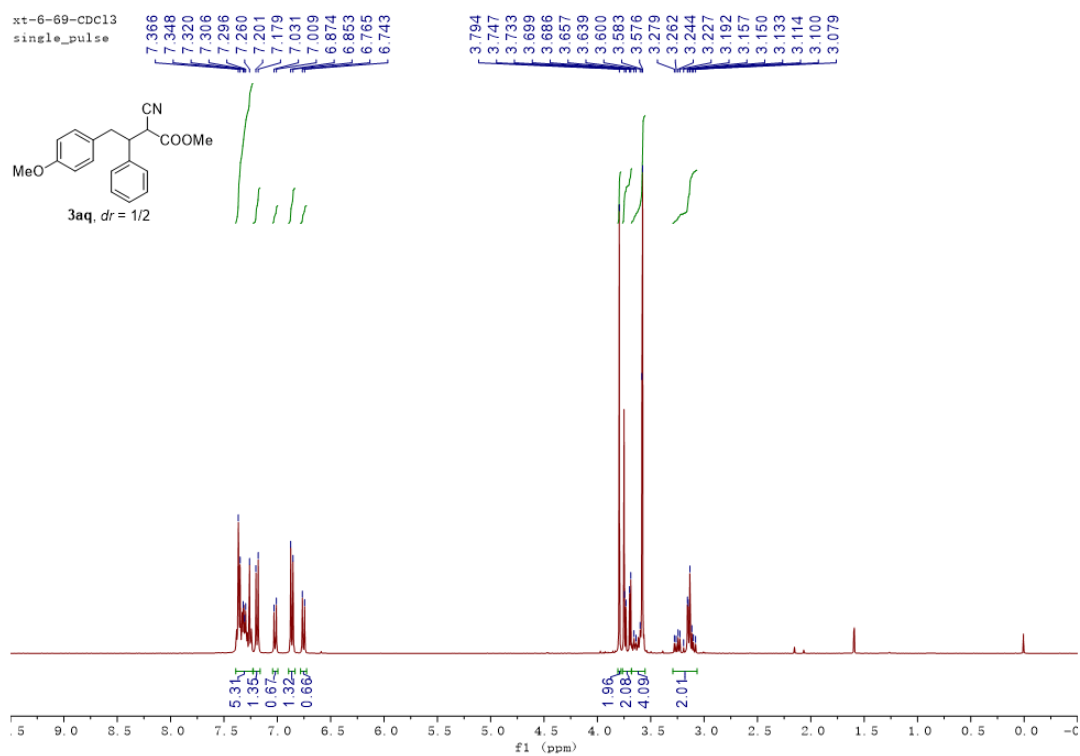

<sup>1</sup>H NMR (400 MHz, CDCl<sub>3</sub>) of **3aq**

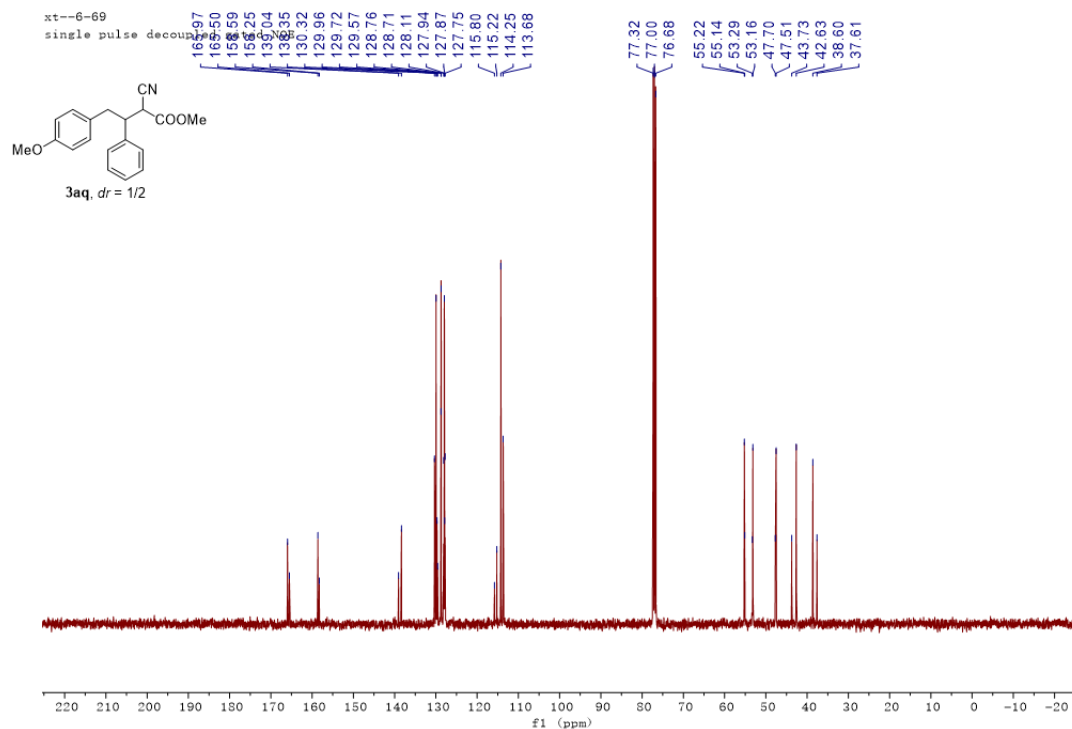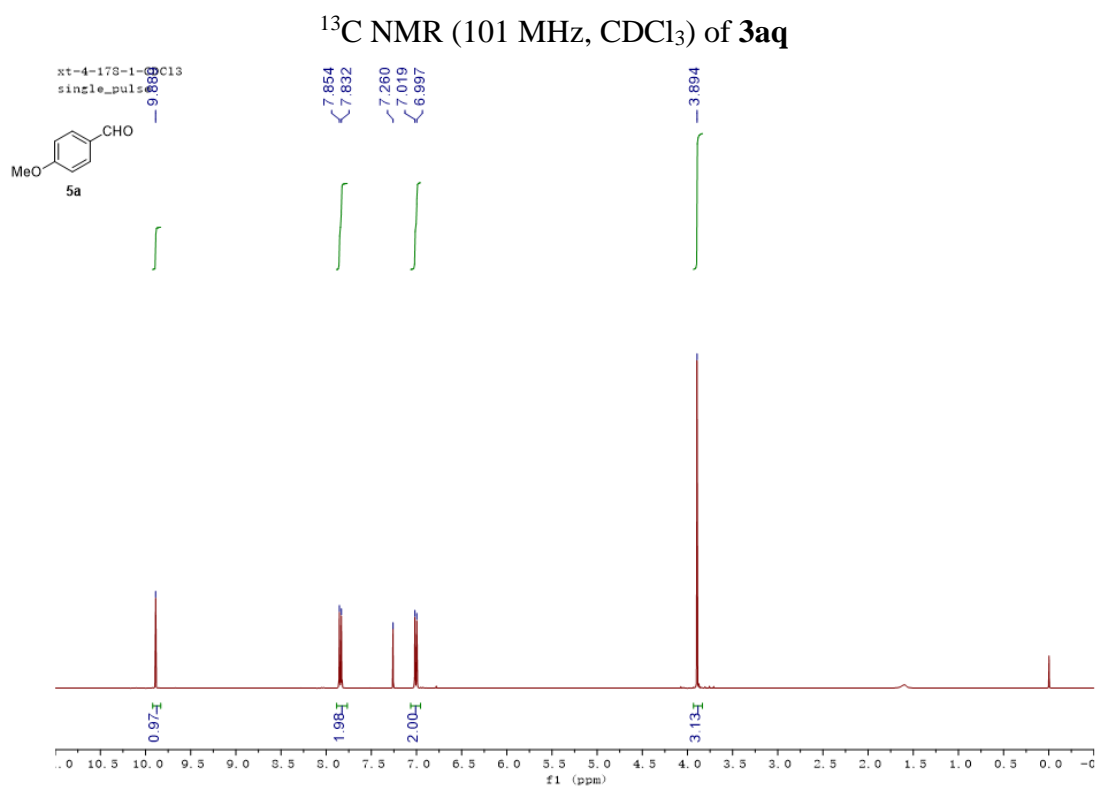

$^1\text{H}$  NMR (400 MHz,  $\text{CDCl}_3$ ) of **5a**

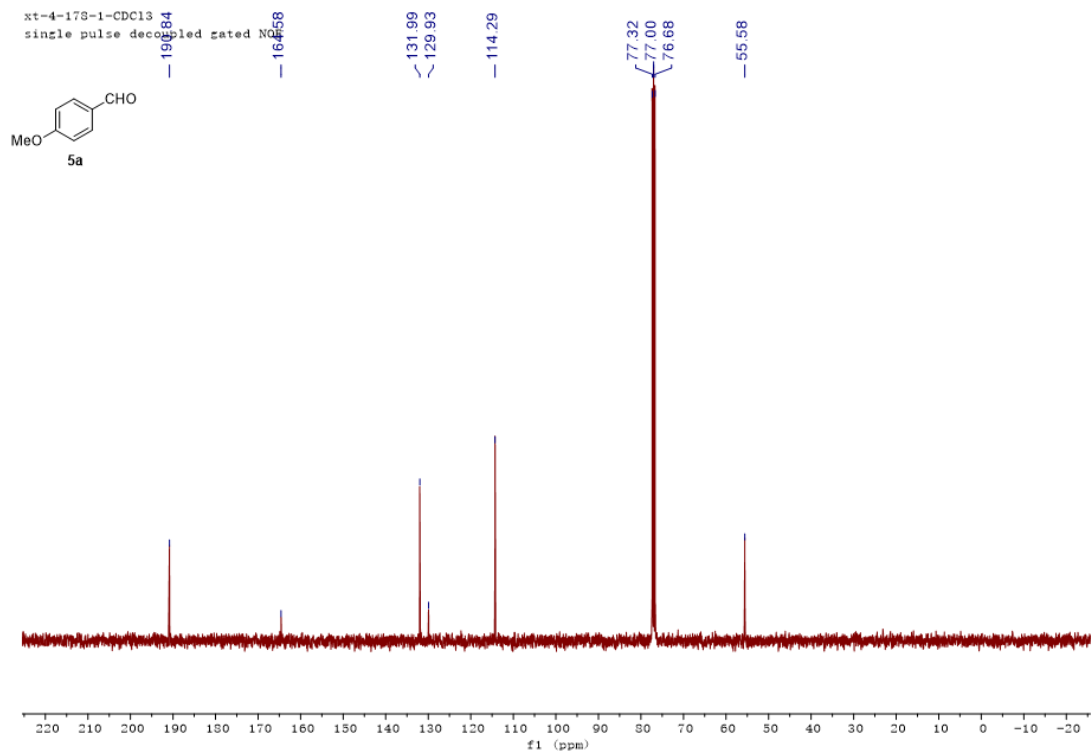

<sup>13</sup>C NMR (101 MHz, CDCl<sub>3</sub>) of **5a**

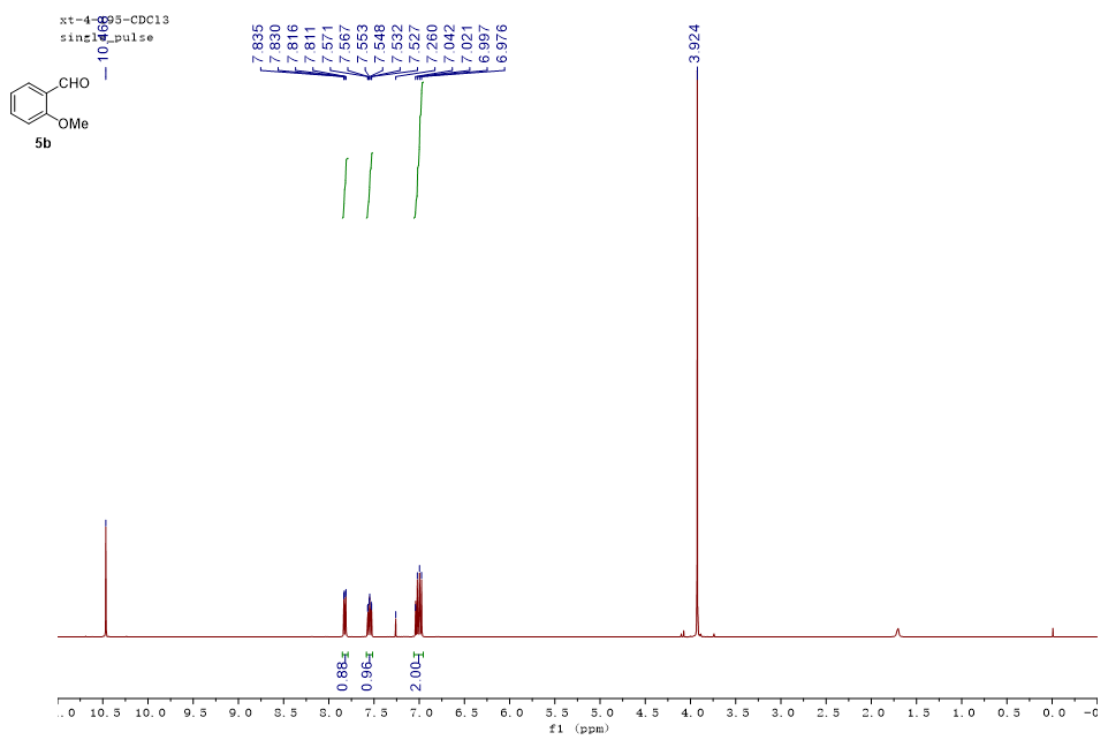

<sup>1</sup>H NMR (400 MHz, CDCl<sub>3</sub>) of **5b**

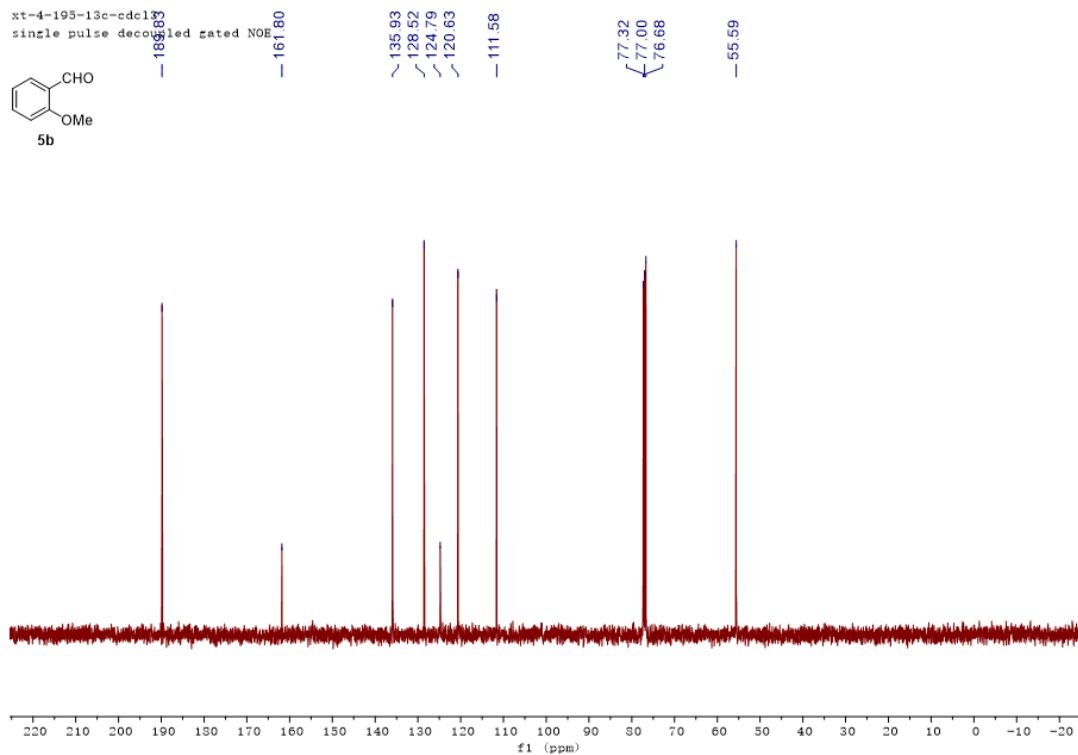

$^{13}\text{C}$  NMR (101 MHz,  $\text{CDCl}_3$ ) of **5b**

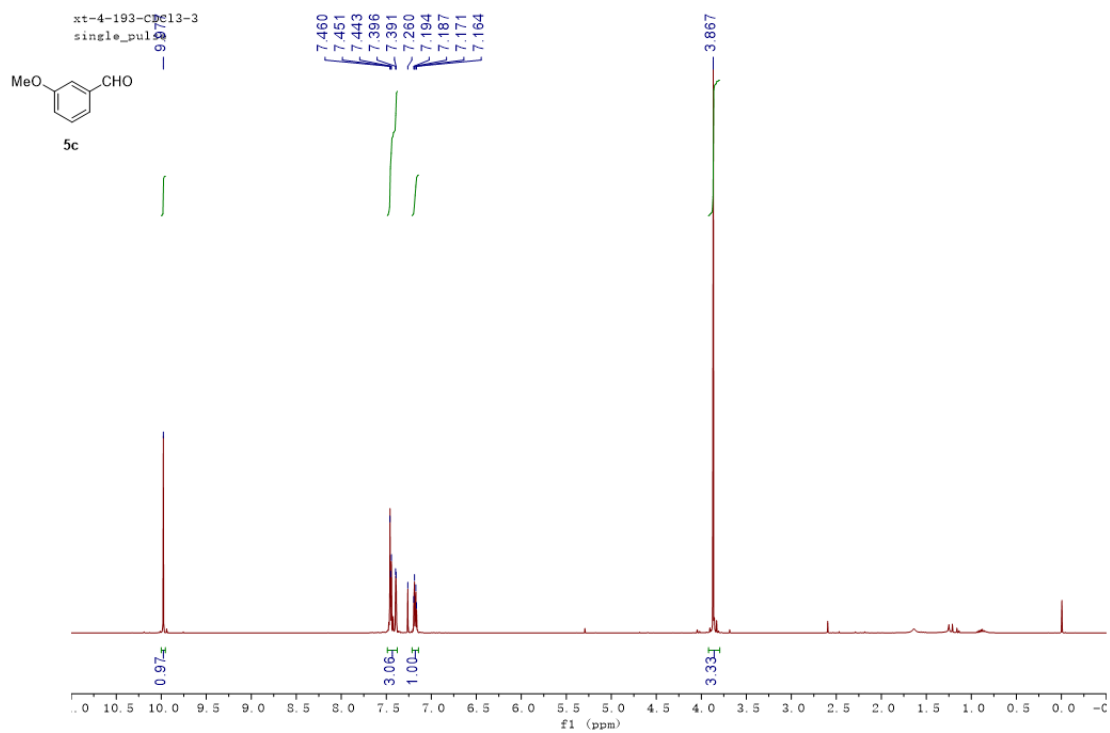

$^1\text{H}$  NMR (400 MHz,  $\text{CDCl}_3$ ) of **5c**



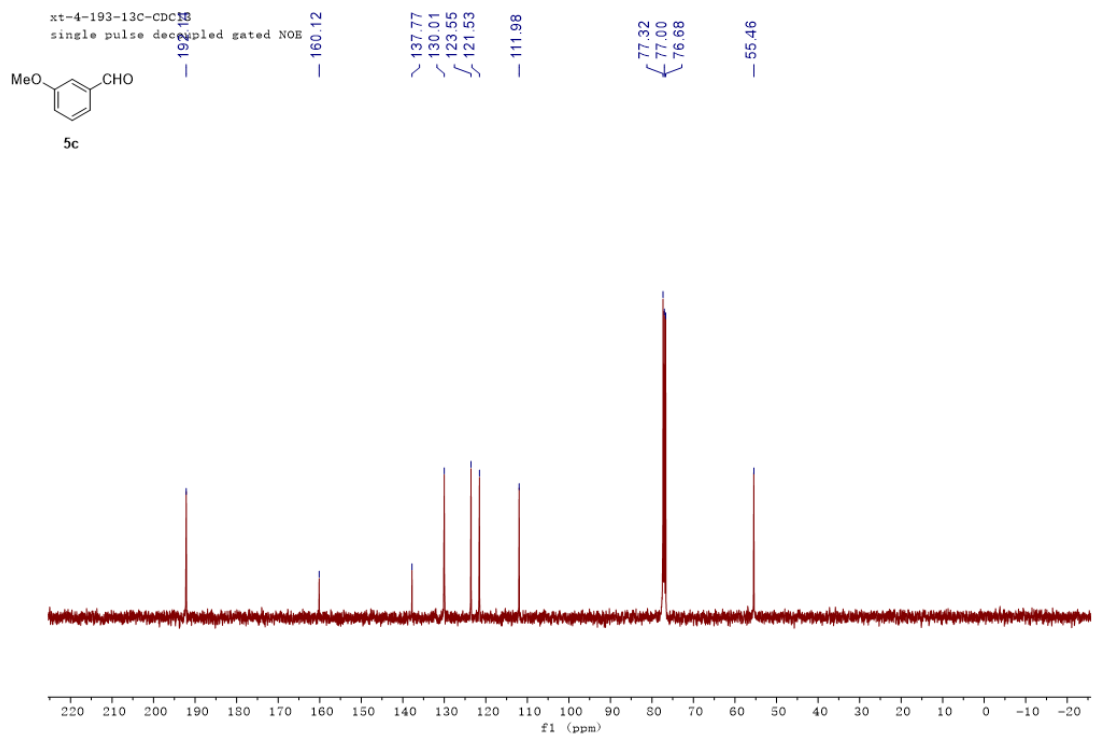

<sup>13</sup>C NMR (101 MHz, CDCl<sub>3</sub>) of **5c**

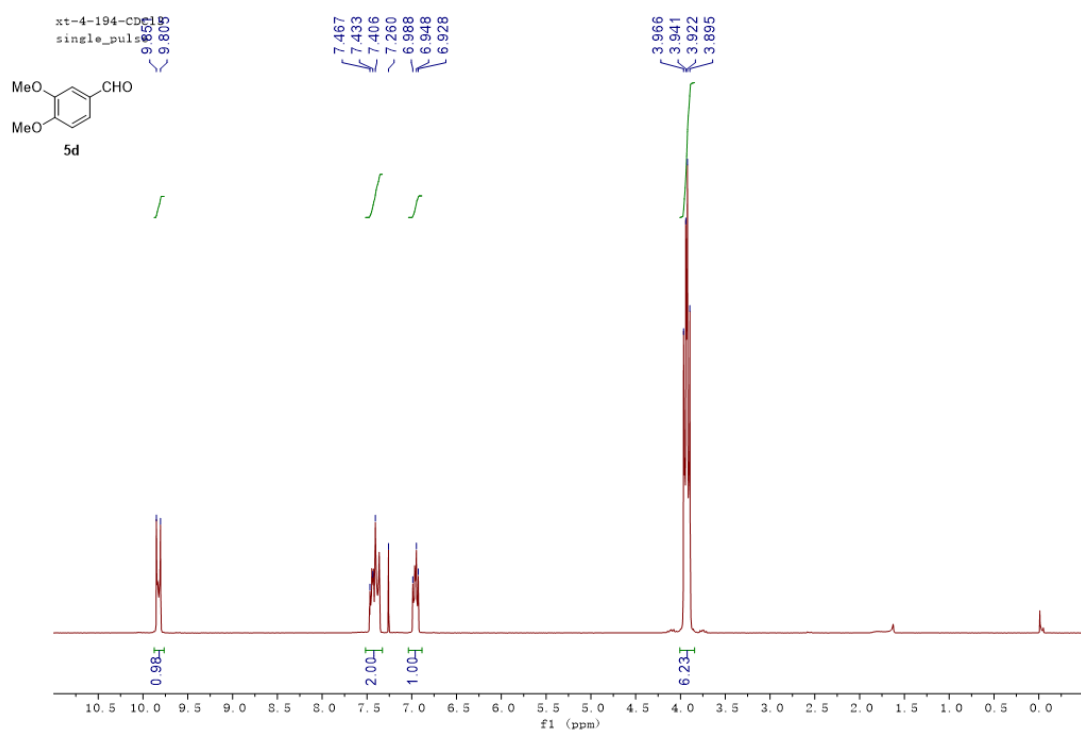

<sup>1</sup>H NMR (400 MHz, CDCl<sub>3</sub>) of **5d**

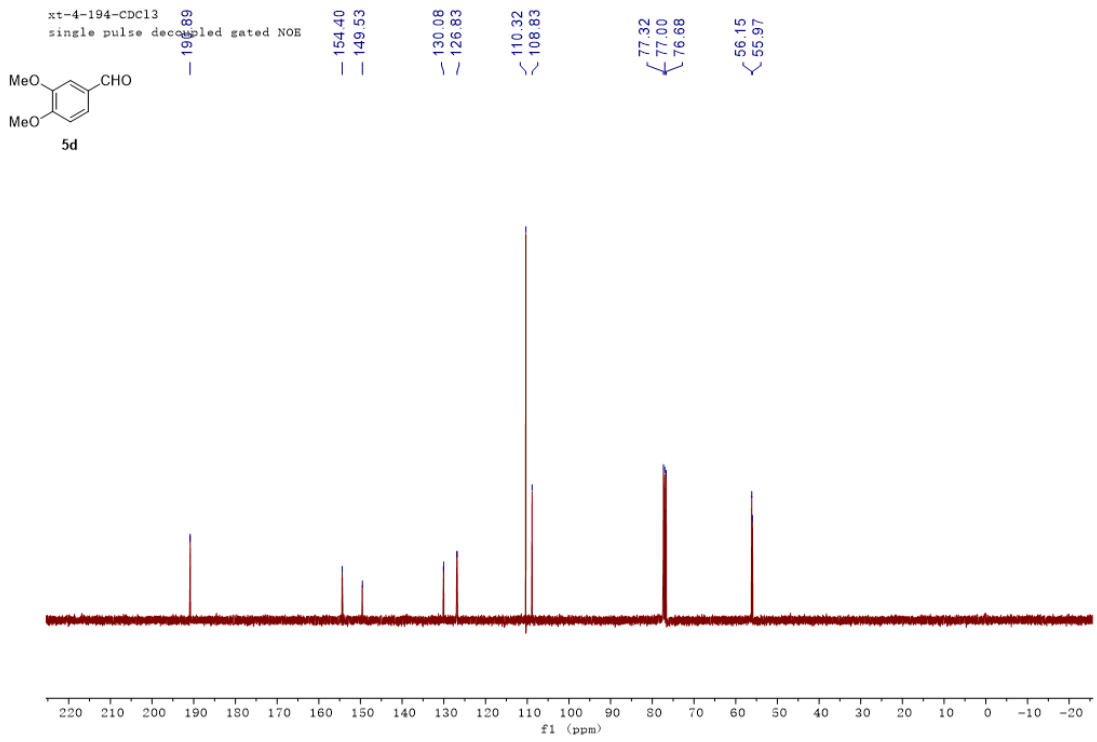

<sup>13</sup>C NMR (101 MHz, CDCl<sub>3</sub>) of 5d

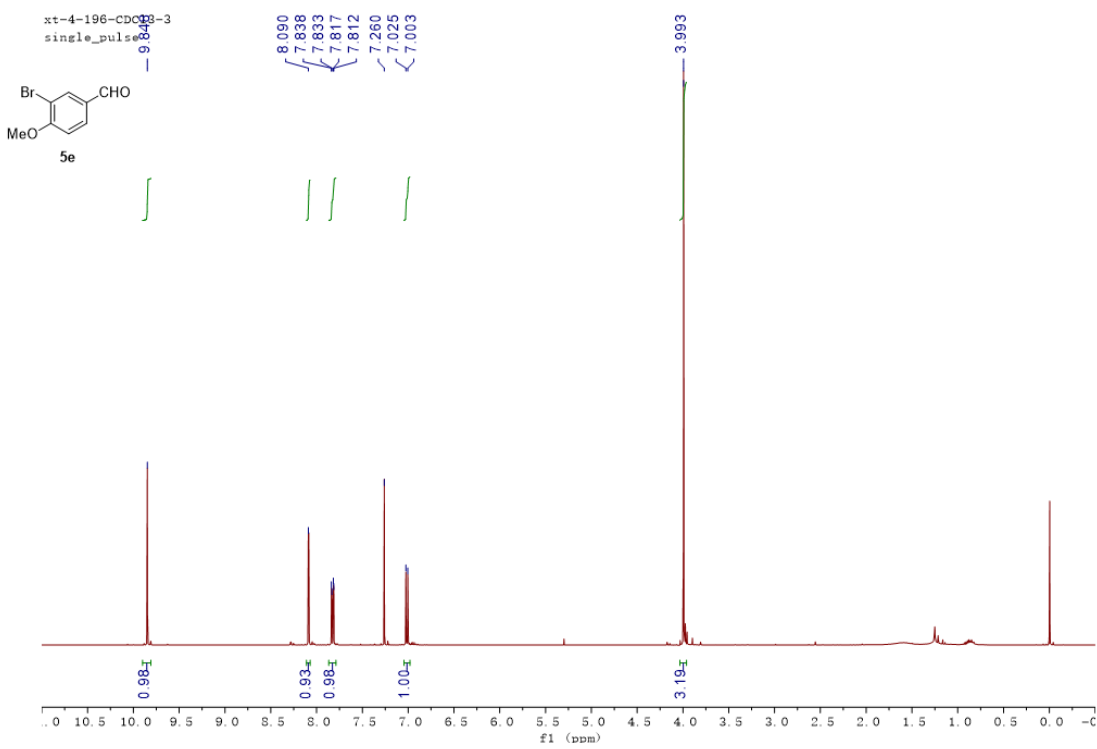

<sup>1</sup>H NMR (400 MHz, CDCl<sub>3</sub>) of 5e

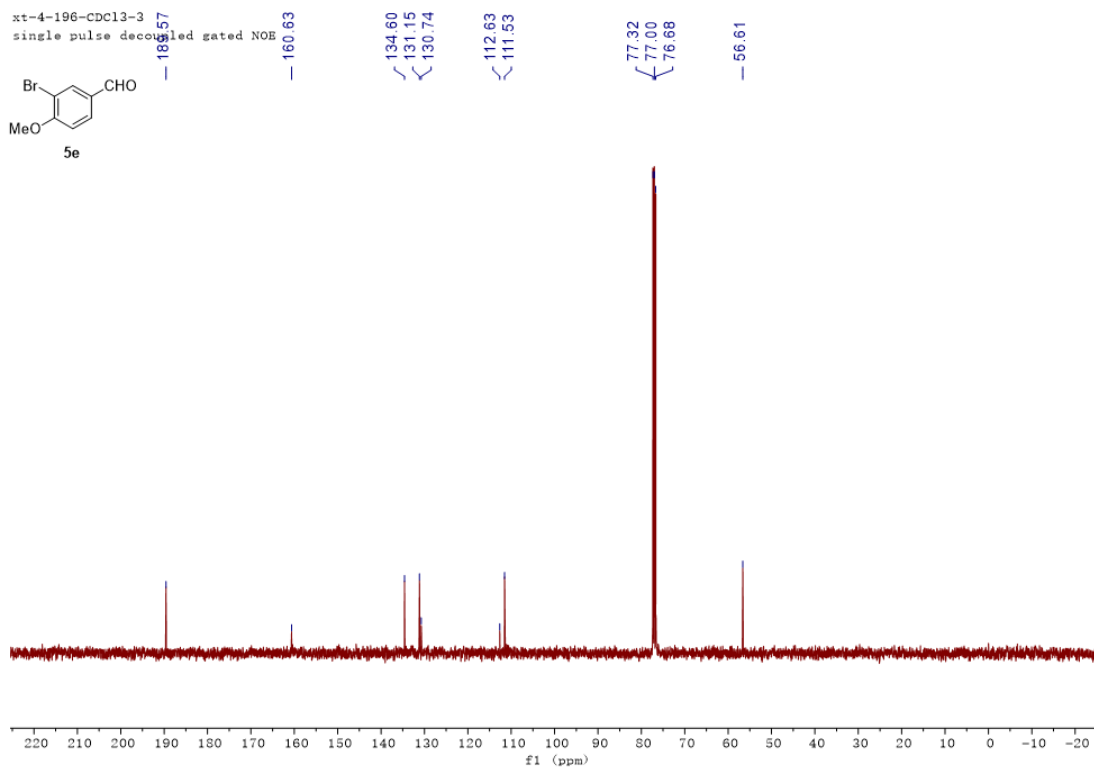

$^{13}\text{C}$  NMR (101 MHz,  $\text{CDCl}_3$ ) of **5e**

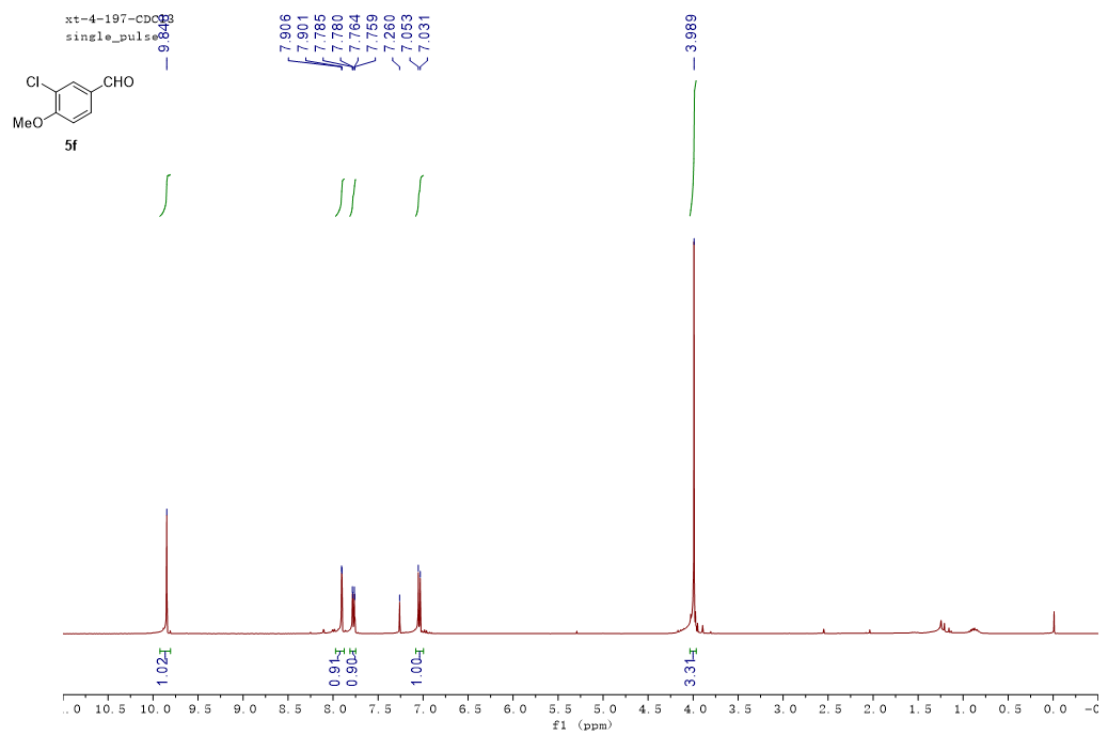

$^1\text{H}$  NMR (400 MHz,  $\text{CDCl}_3$ ) of **5f**

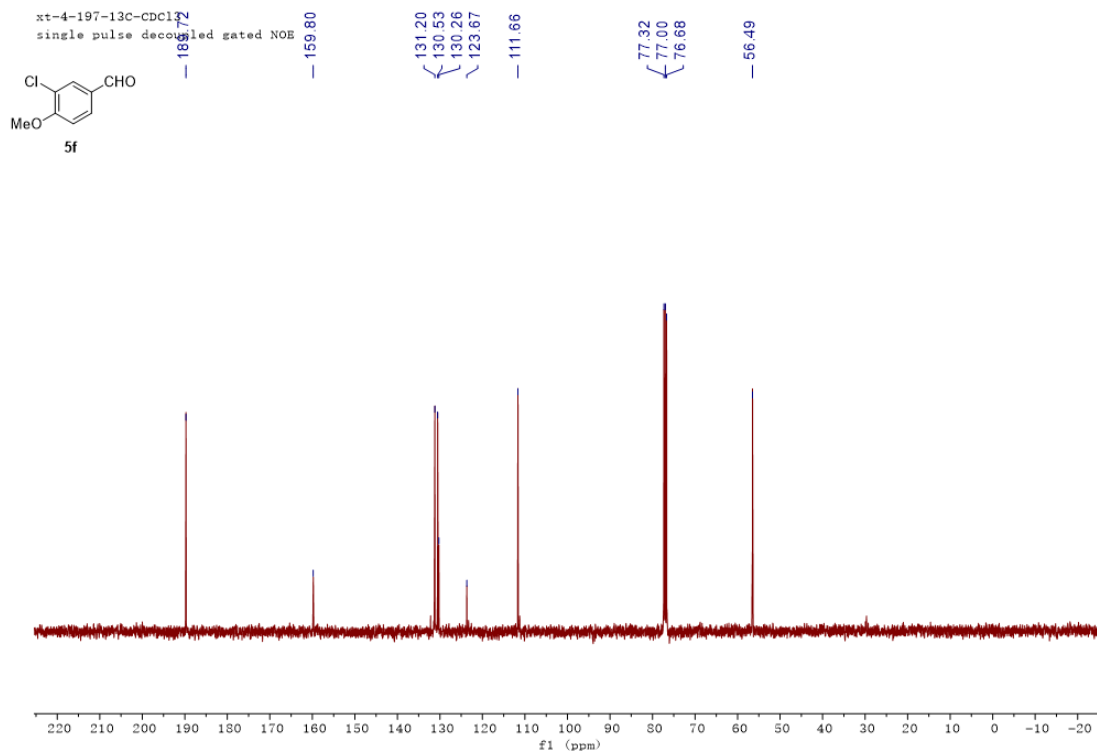

<sup>13</sup>C NMR (101 MHz, CDCl<sub>3</sub>) of **5f**

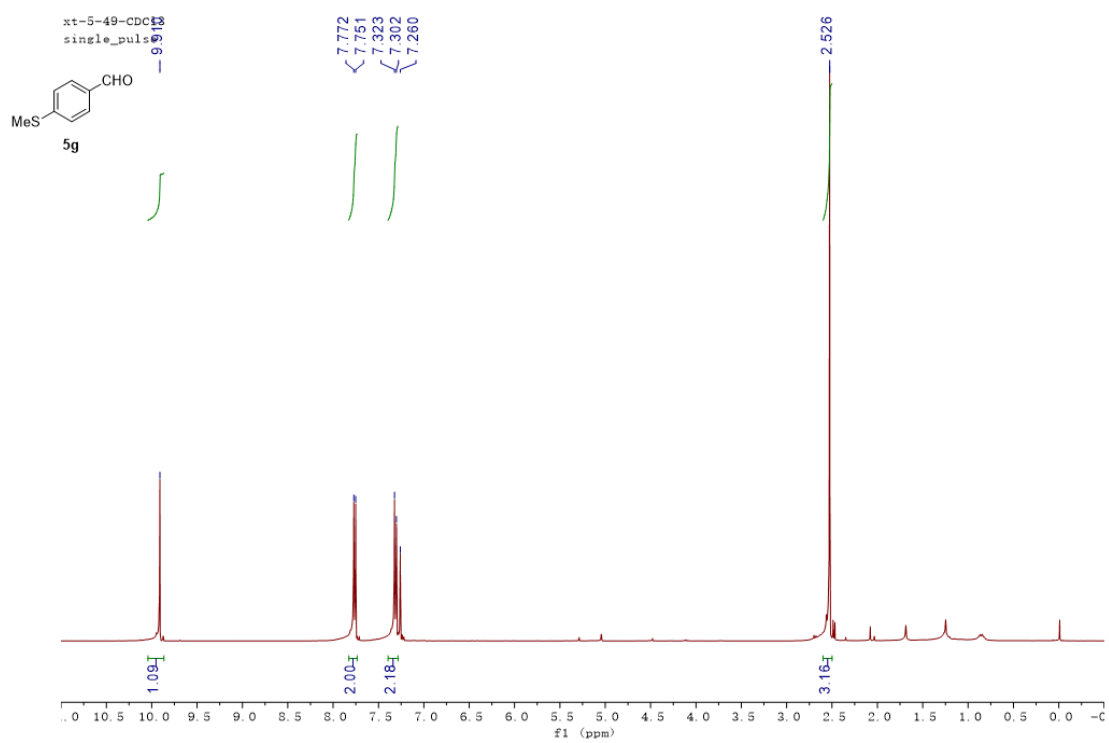

<sup>1</sup>H NMR (400 MHz, CDCl<sub>3</sub>) of **5g**

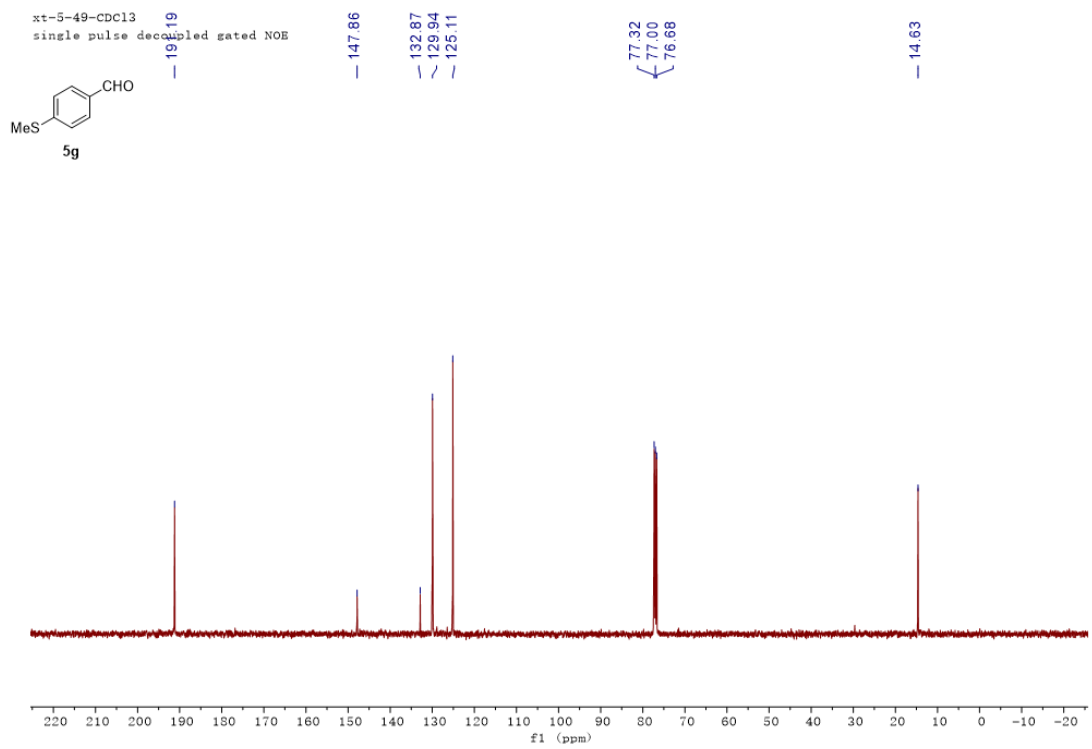

<sup>13</sup>C NMR (101 MHz, CDCl<sub>3</sub>) of **5g**

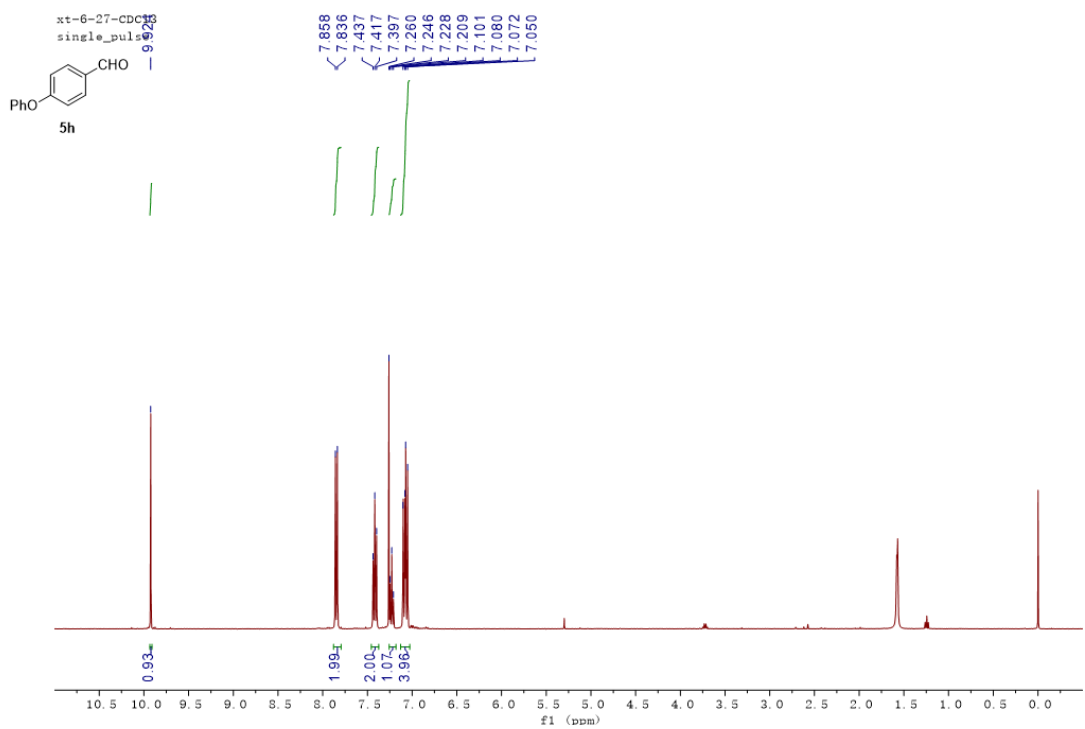

<sup>1</sup>H NMR (400 MHz, CDCl<sub>3</sub>) of **5h**

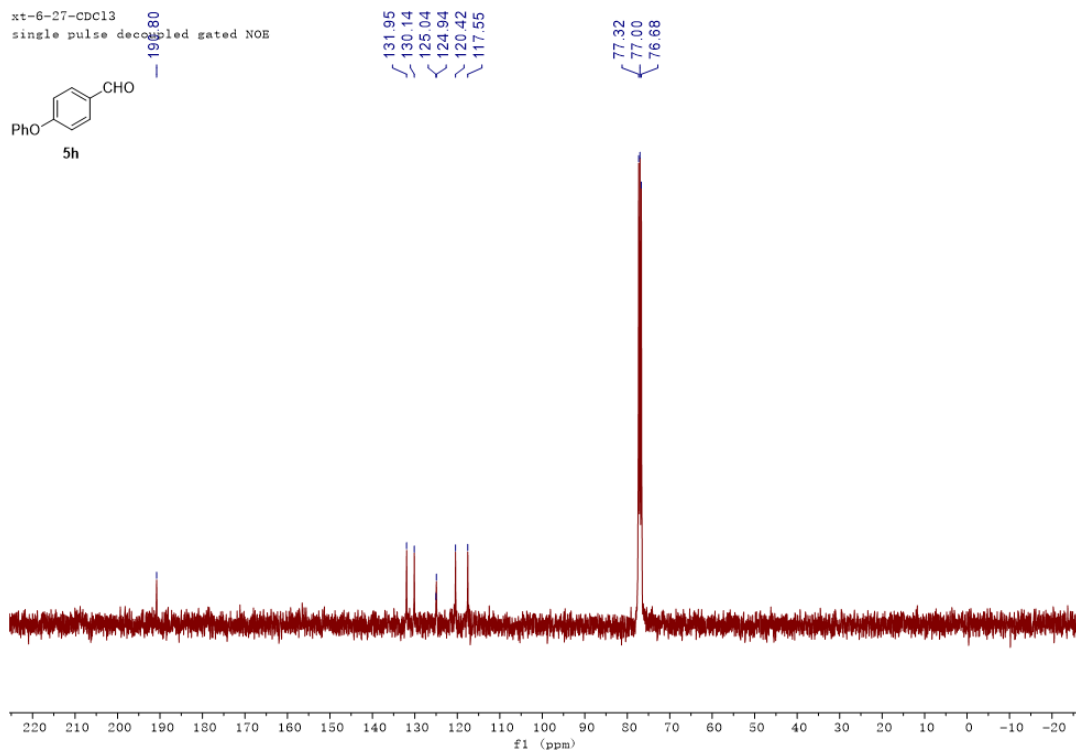

$^{13}\text{C}$  NMR (101 MHz,  $\text{CDCl}_3$ ) of **5h**

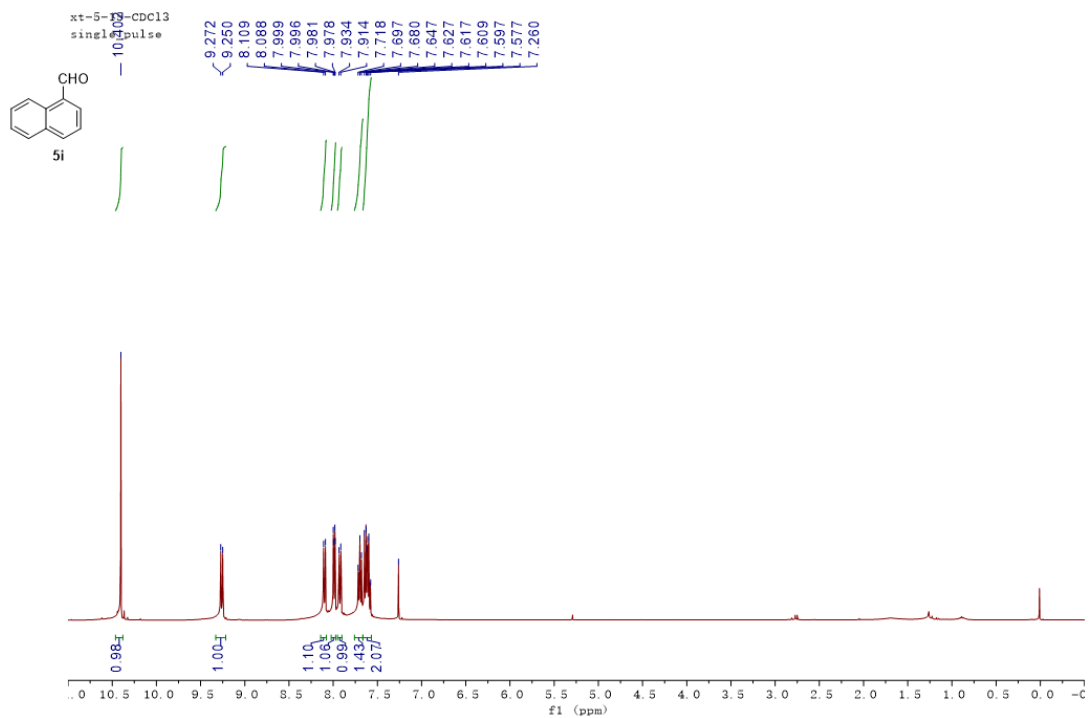

$^1\text{H}$  NMR (400 MHz,  $\text{CDCl}_3$ ) of **5i**

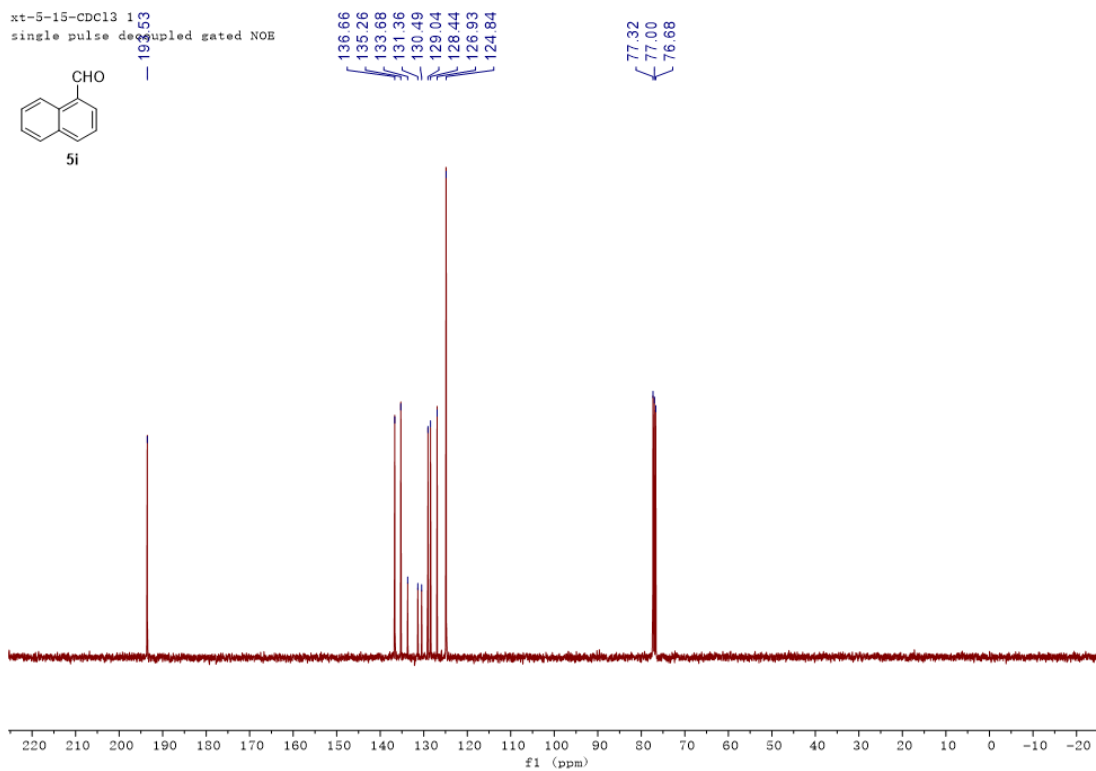

$^{13}\text{C}$  NMR (101 MHz,  $\text{CDCl}_3$ ) of **5i**

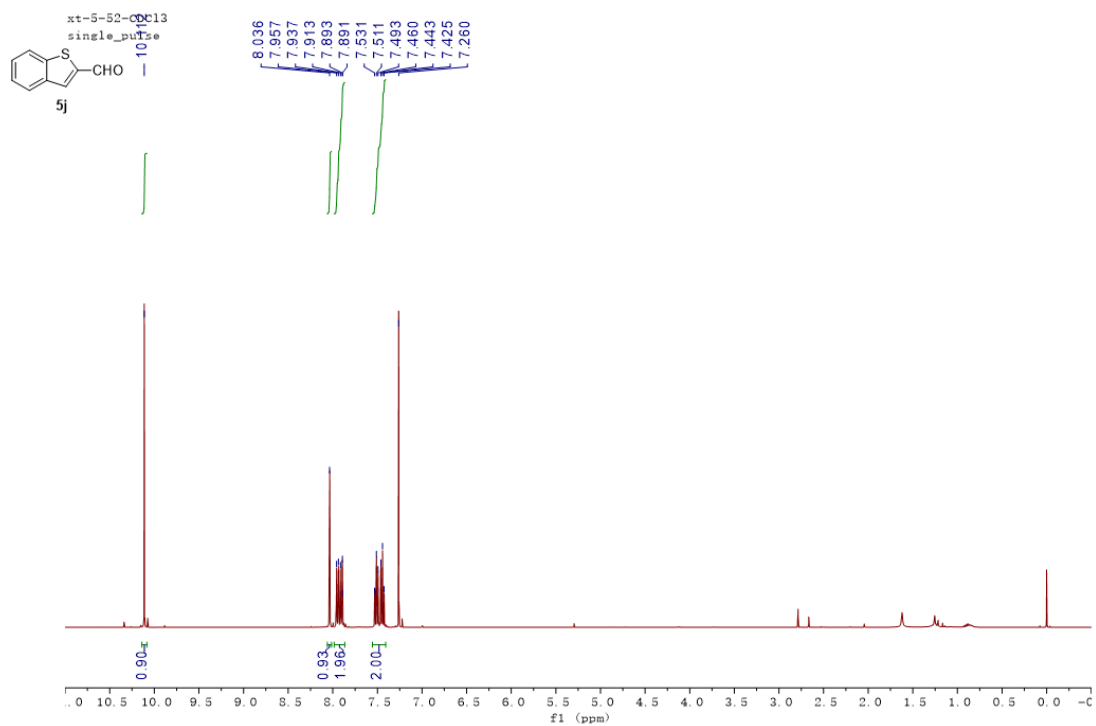

$^1\text{H}$  NMR (400 MHz,  $\text{CDCl}_3$ ) of **5j**

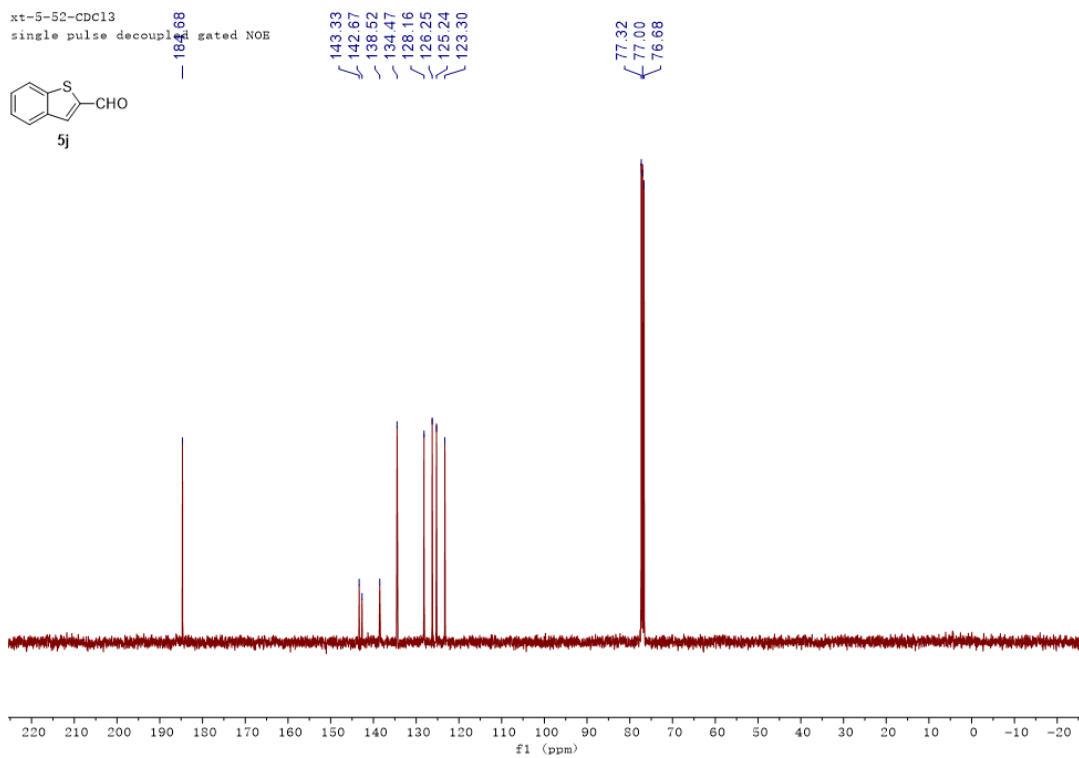

<sup>13</sup>C NMR (101 MHz, CDCl<sub>3</sub>) of **5j**

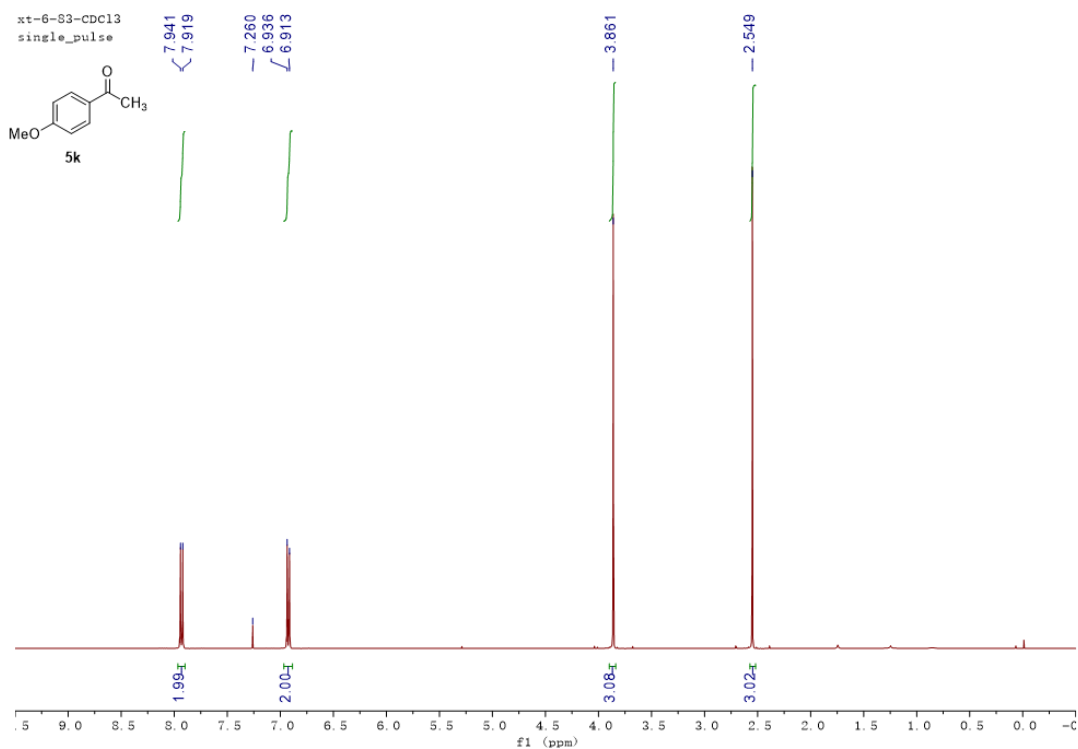

<sup>1</sup>H NMR (400 MHz, CDCl<sub>3</sub>) of **5k**



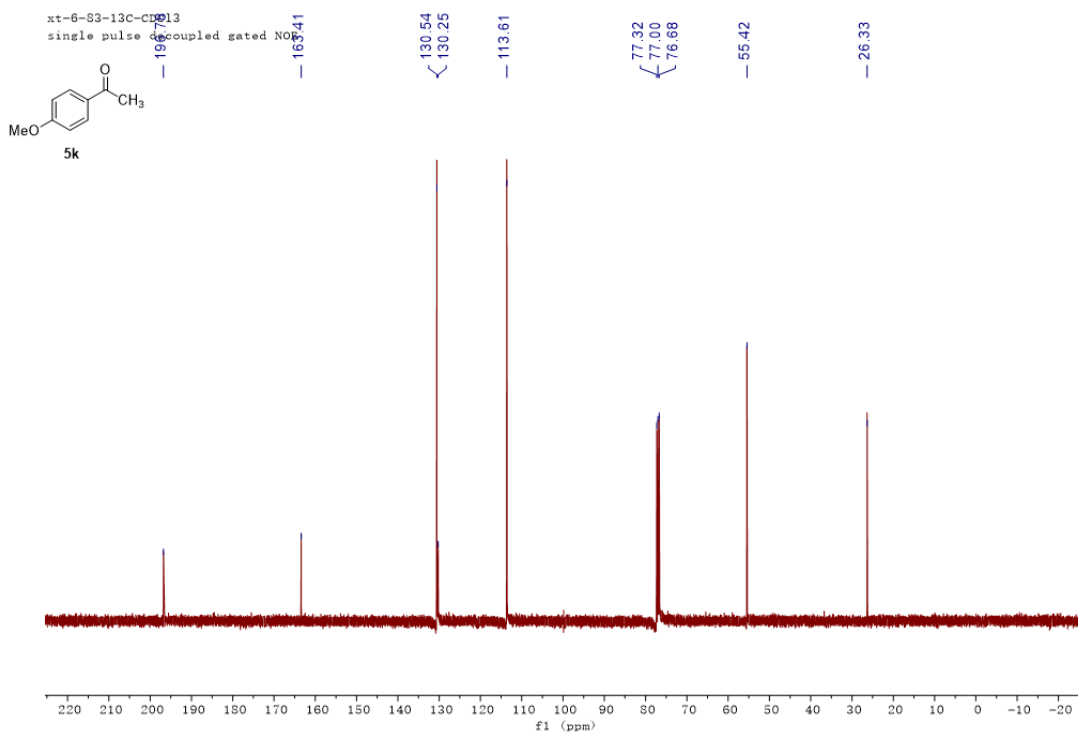

<sup>13</sup>C NMR (101 MHz, CDCl<sub>3</sub>) of **5k**

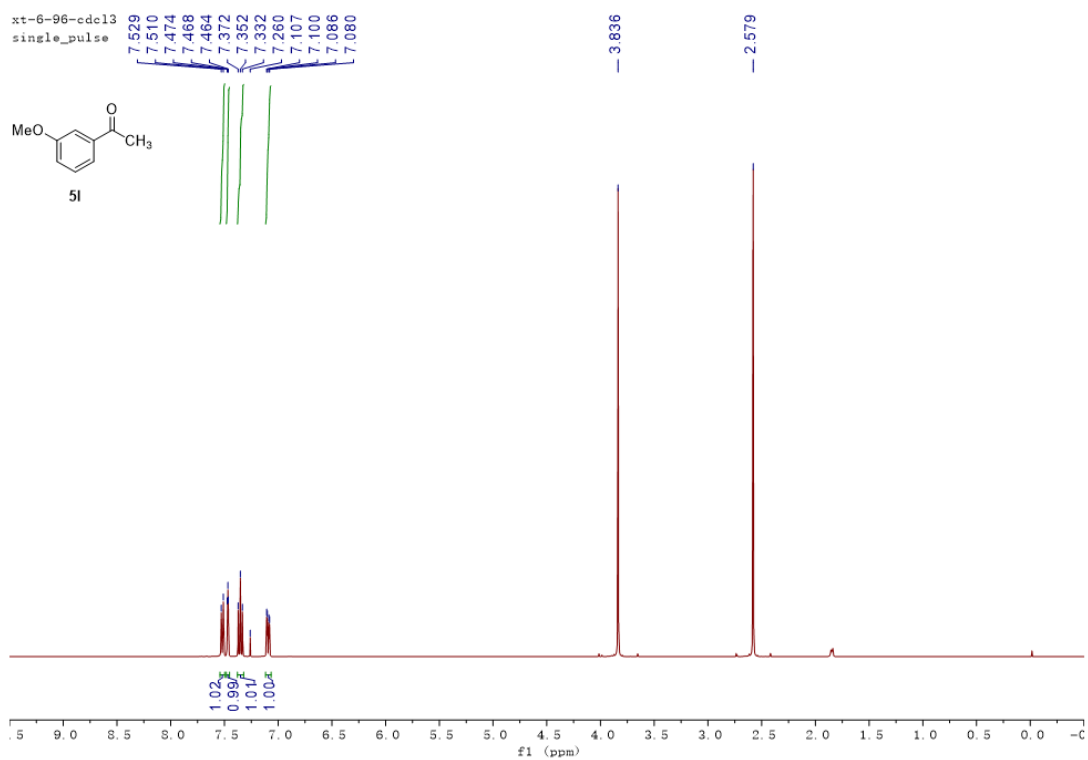

<sup>1</sup>H NMR (400 MHz, CDCl<sub>3</sub>) of **5l**

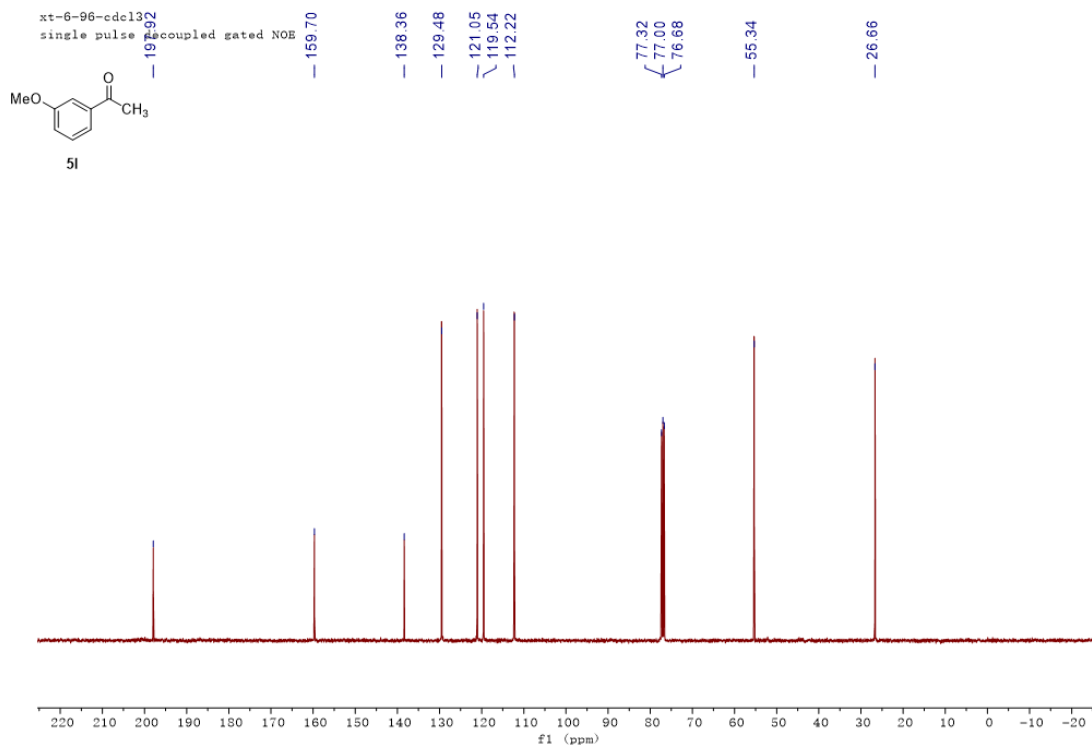

<sup>13</sup>C NMR (101 MHz, CDCl<sub>3</sub>) of **5l**

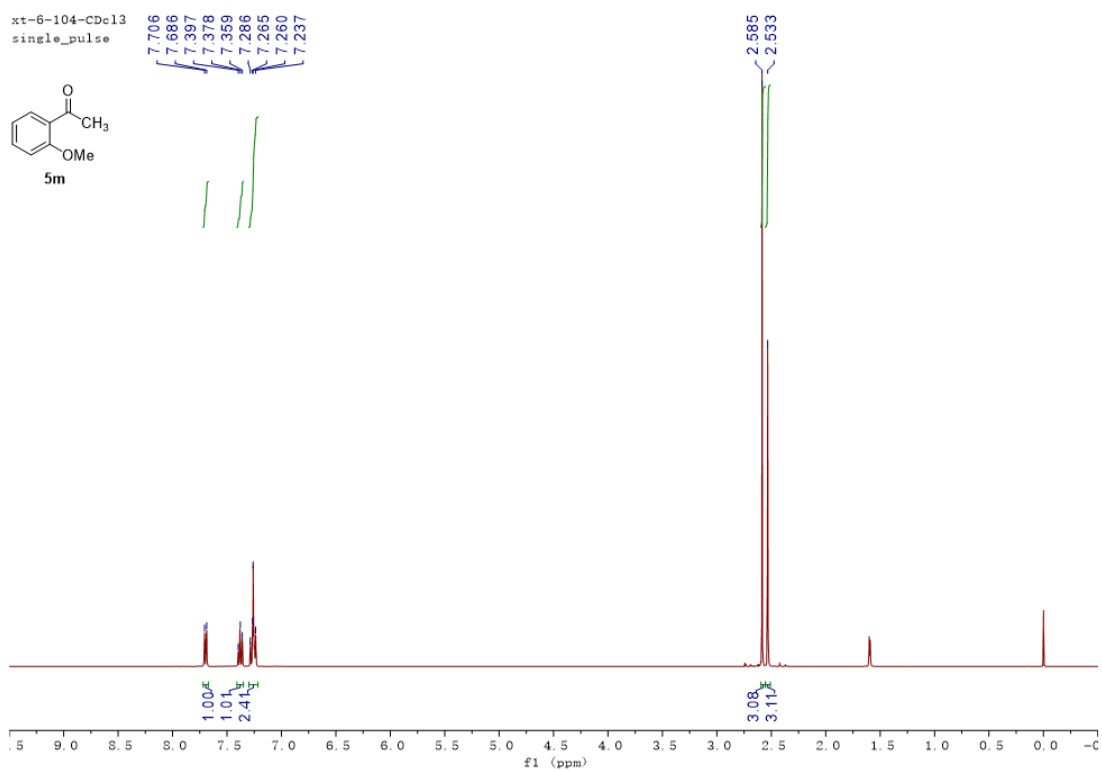

<sup>1</sup>H NMR (400 MHz, CDCl<sub>3</sub>) of **5m**

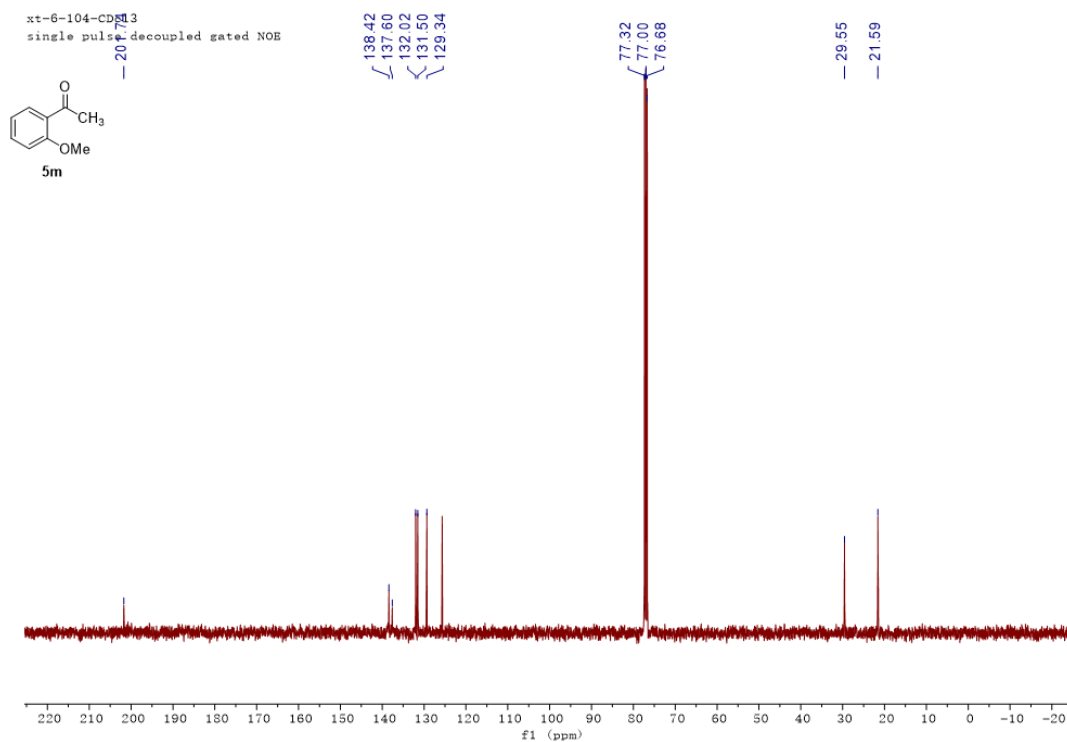

<sup>13</sup>C NMR (101 MHz, CDCl<sub>3</sub>) of **5m**

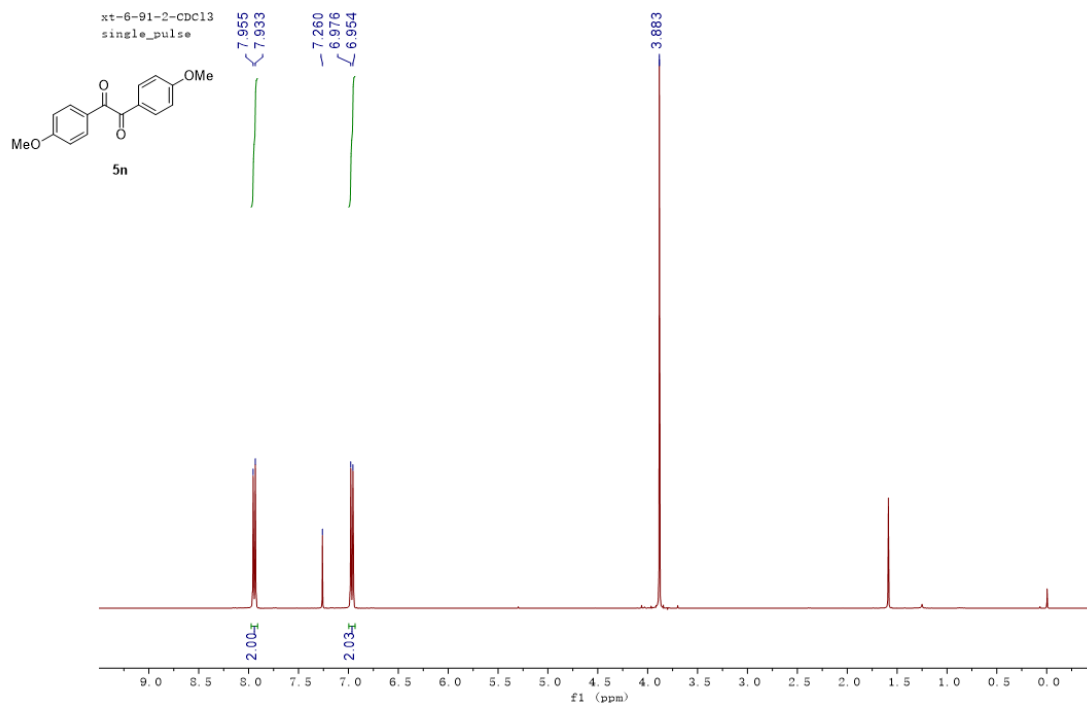

<sup>1</sup>H NMR (400 MHz, CDCl<sub>3</sub>) of **5n**

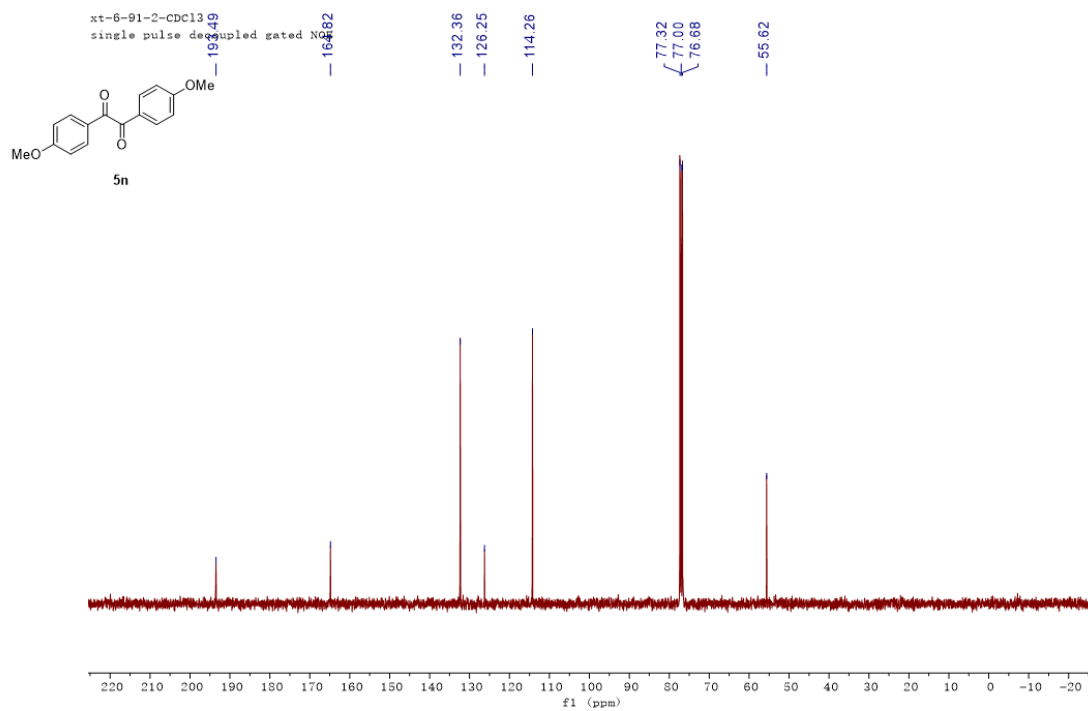

$^{13}\text{C}$  NMR (101 MHz,  $\text{CDCl}_3$ ) of **5n**

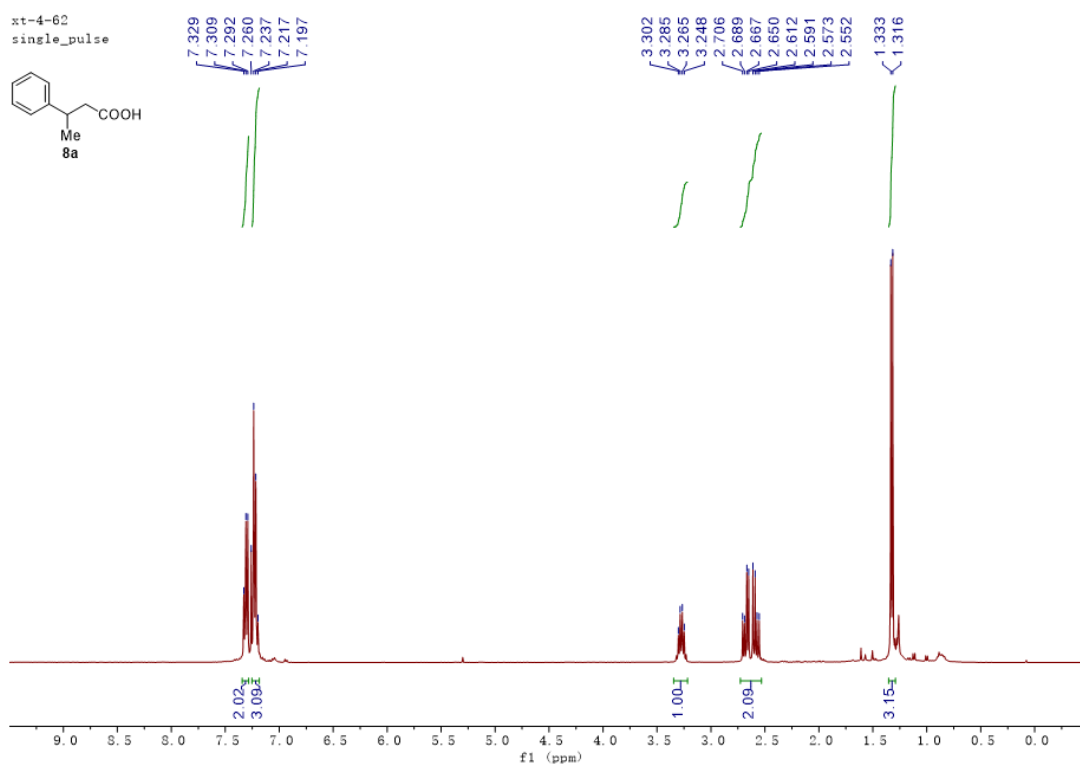

$^1\text{H}$  NMR (400 MHz,  $\text{CDCl}_3$ ) of **8a**

xt-5-2-cdcl3  
single pulse decoupled gated NOE

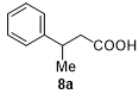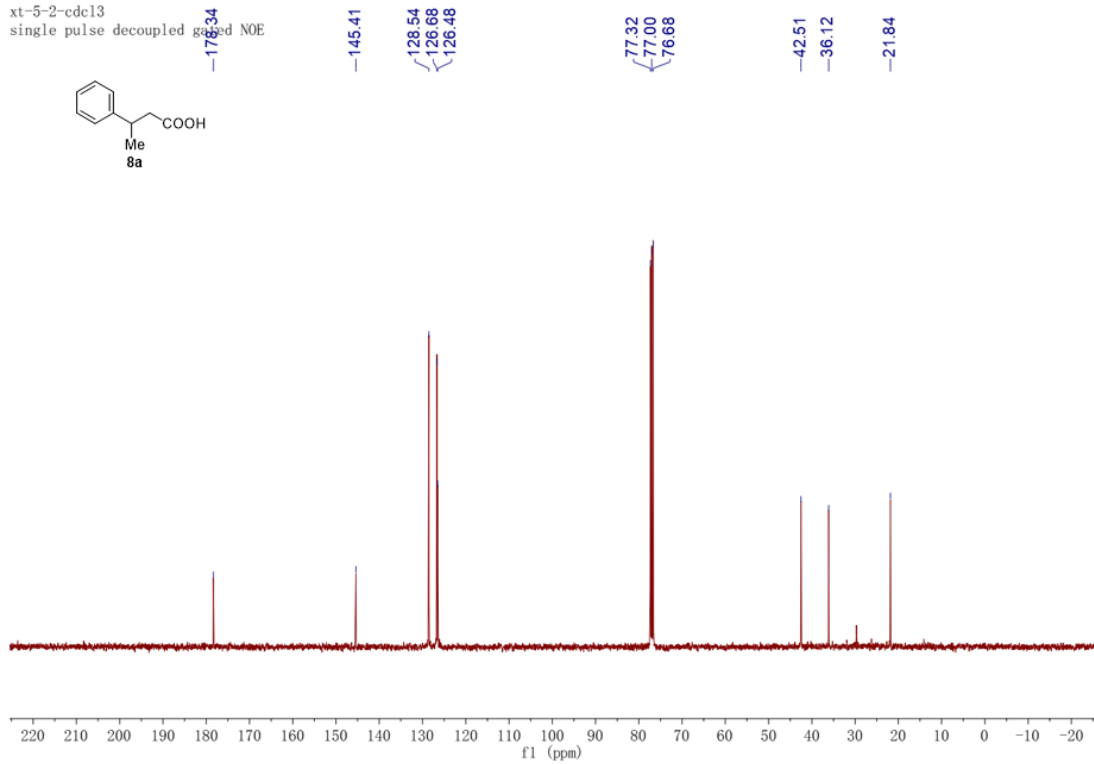

<sup>13</sup>C NMR (101 MHz, CDCl<sub>3</sub>) of **8a**

xt-5-22-CDCl3  
single\_pulse

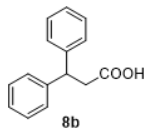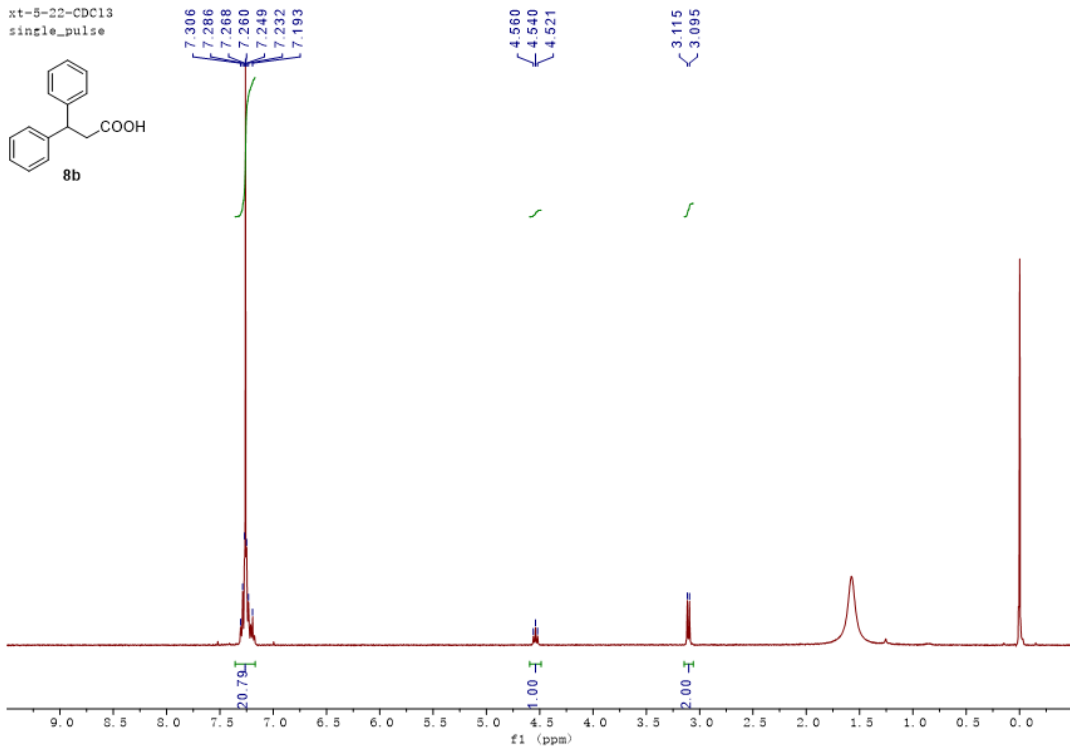

<sup>1</sup>H NMR (400 MHz, CDCl<sub>3</sub>) of **8b**

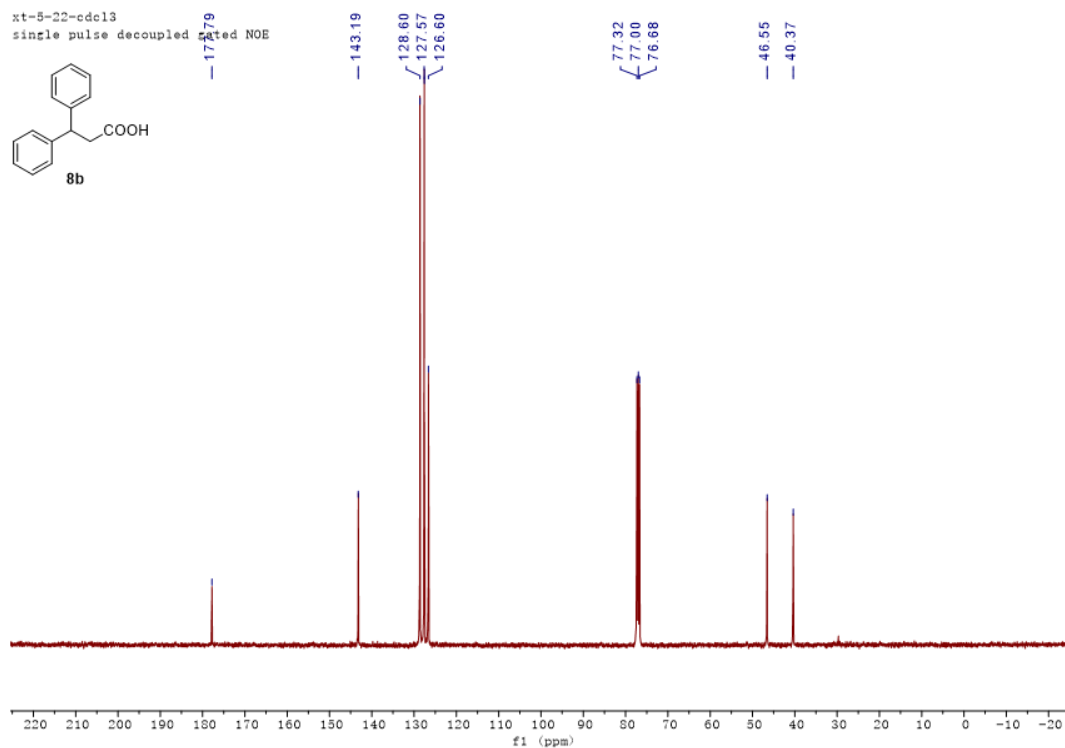

$^{13}\text{C}$  NMR (101 MHz,  $\text{CDCl}_3$ ) of **8b**

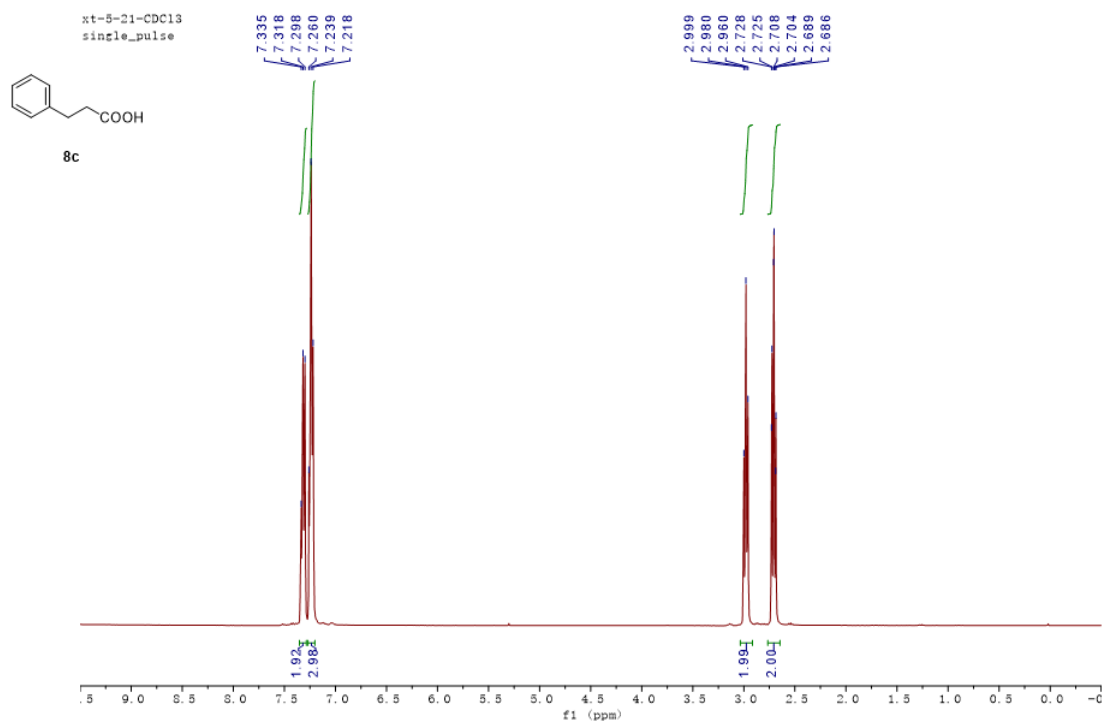

$^1\text{H}$  NMR (400 MHz,  $\text{CDCl}_3$ ) of **8c**

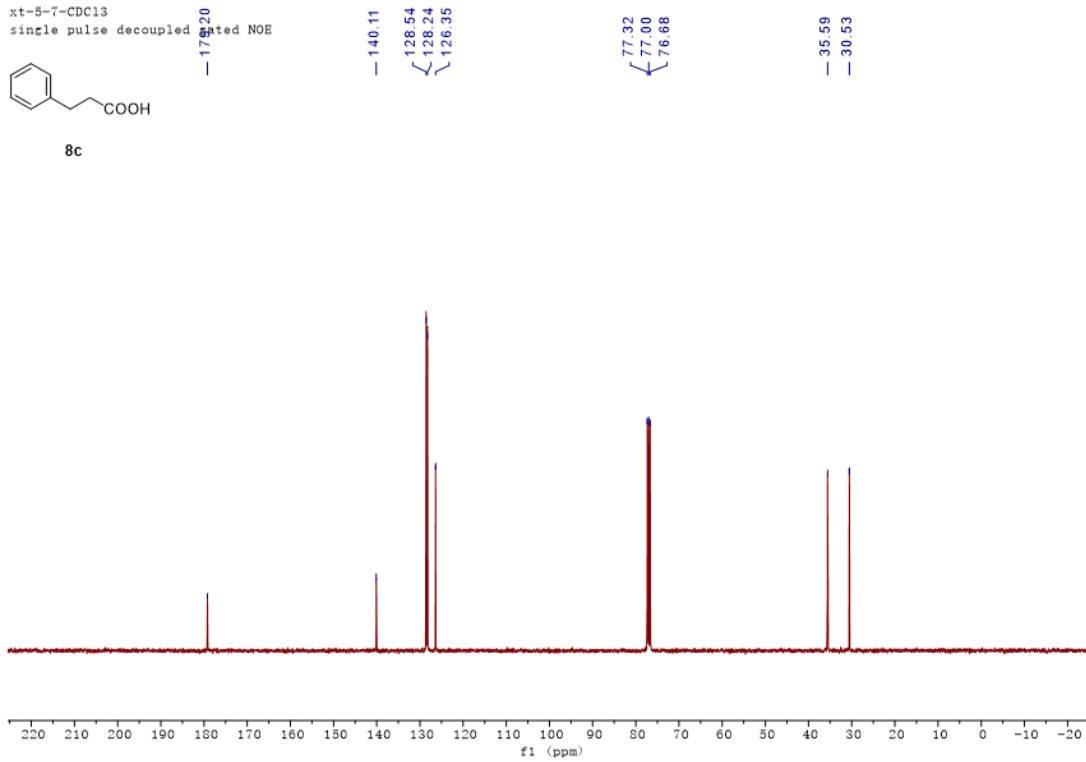

$^{13}\text{C}$  NMR (101 MHz,  $\text{CDCl}_3$ ) of **8c**

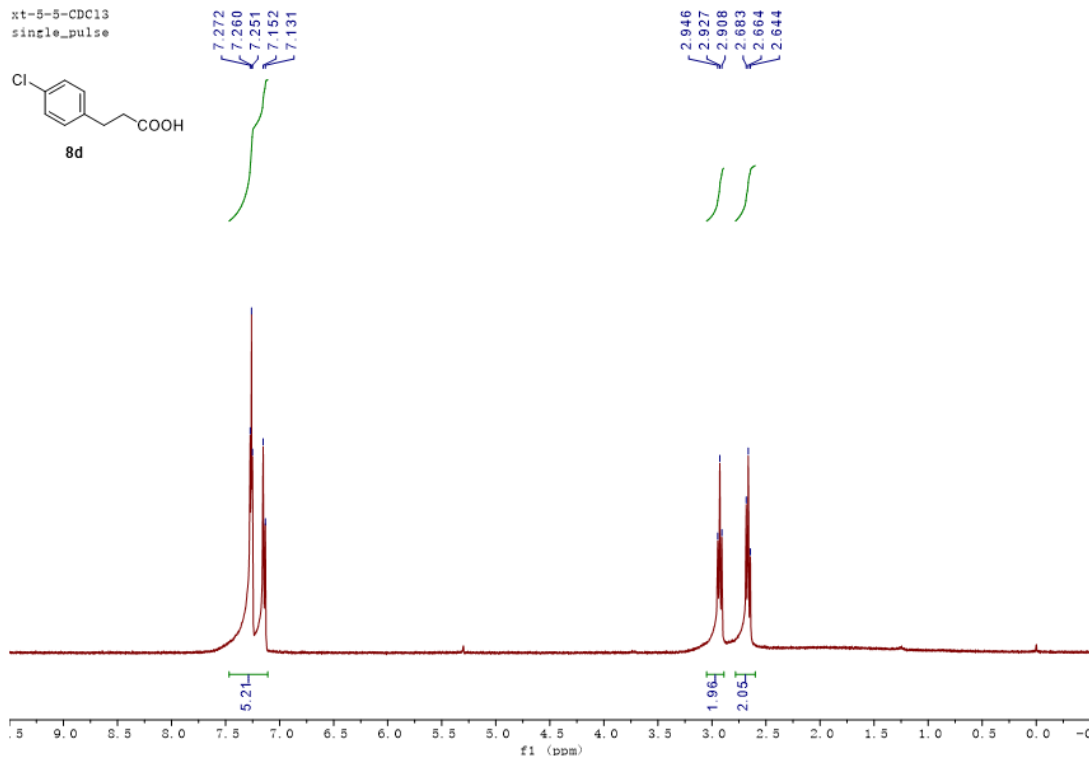

$^1\text{H}$  NMR (400 MHz,  $\text{CDCl}_3$ ) of **8d**

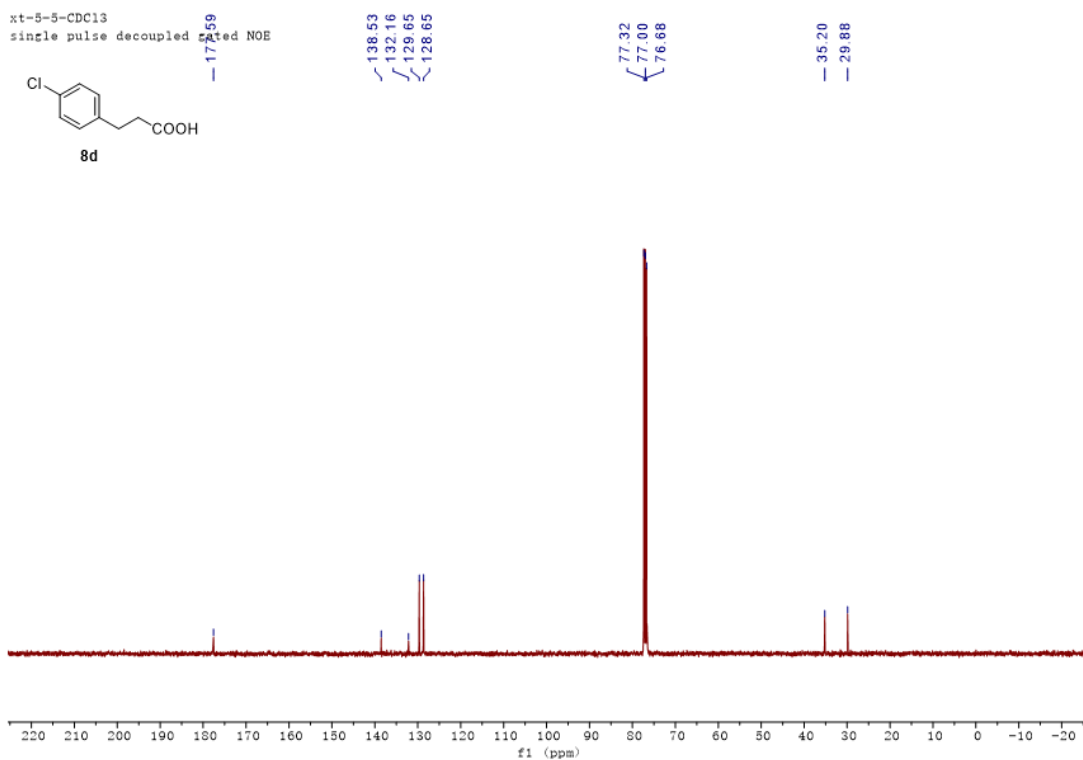

$^{13}\text{C}$  NMR (101 MHz,  $\text{CDCl}_3$ ) of **8d**

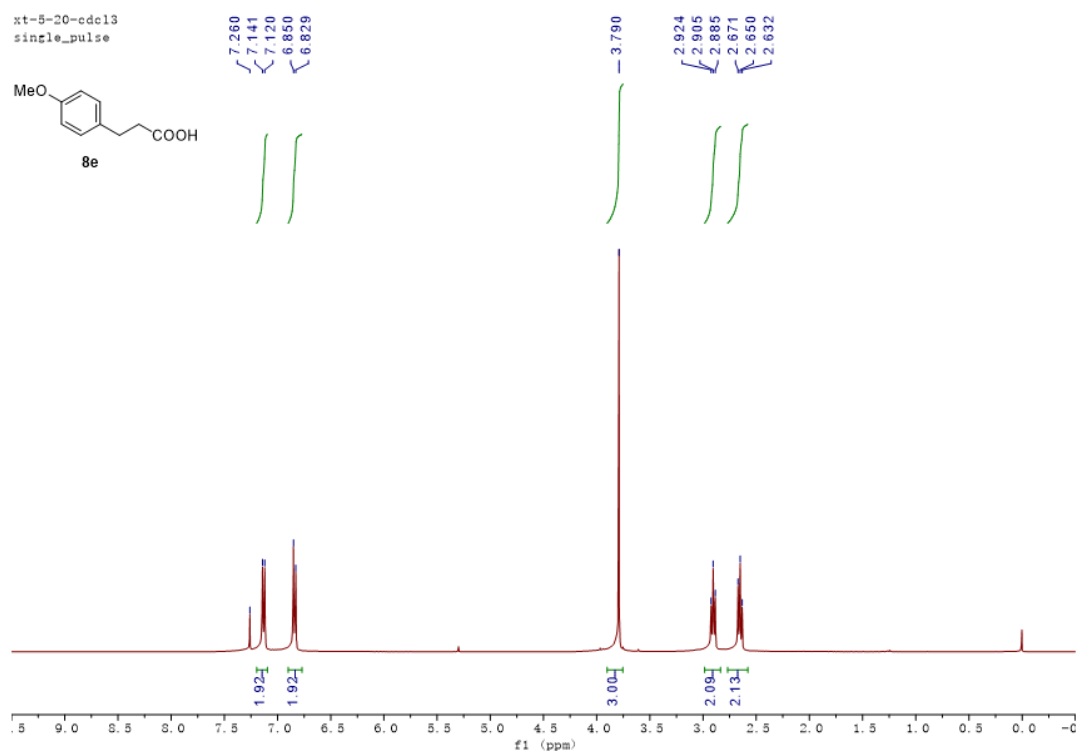

$^1\text{H}$  NMR (400 MHz,  $\text{CDCl}_3$ ) of **8e**



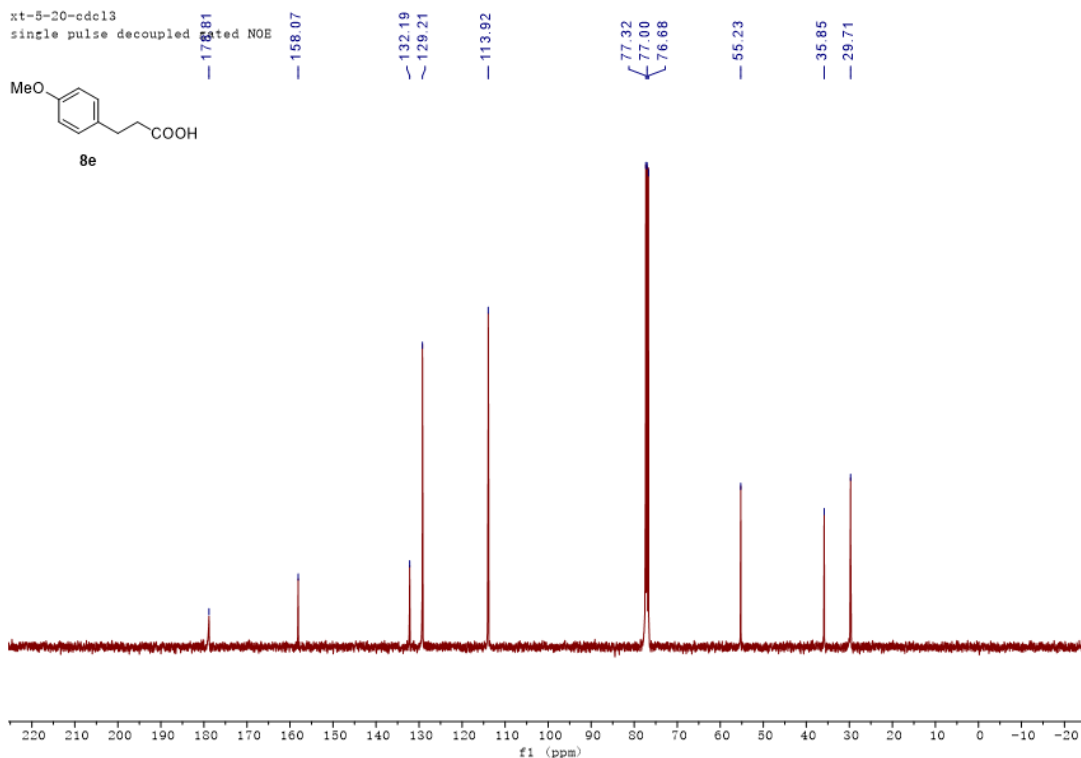

$^{13}\text{C}$  NMR (101 MHz,  $\text{CDCl}_3$ ) of **8e**

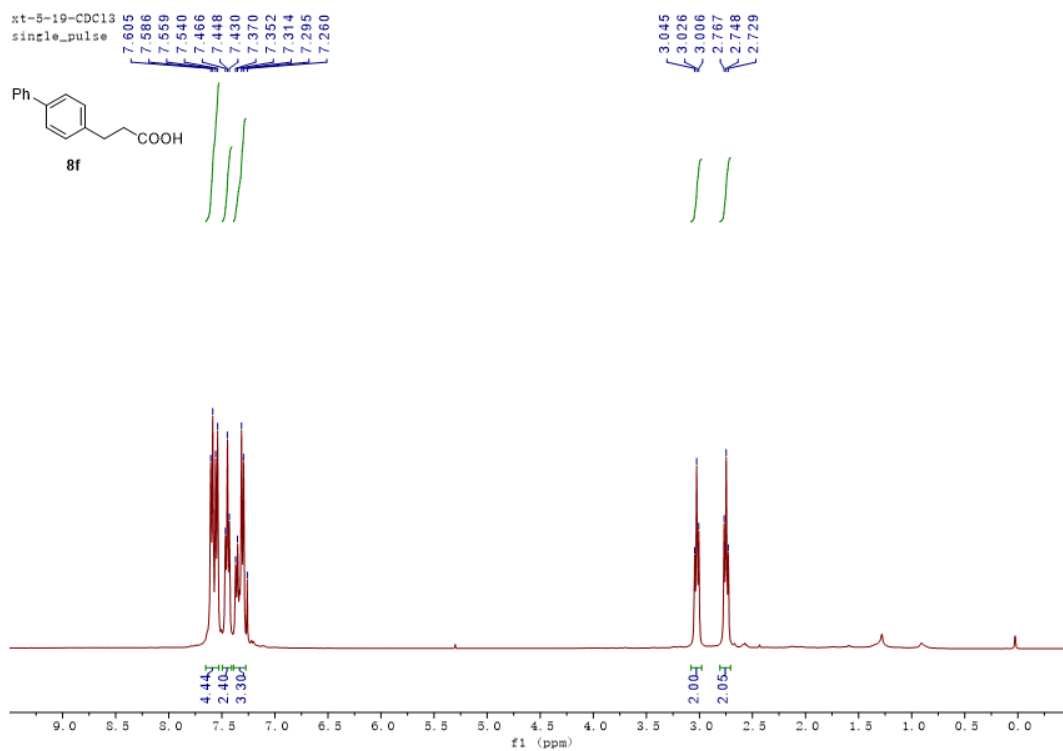

$^1\text{H}$  NMR (400 MHz,  $\text{CDCl}_3$ ) of **8f**

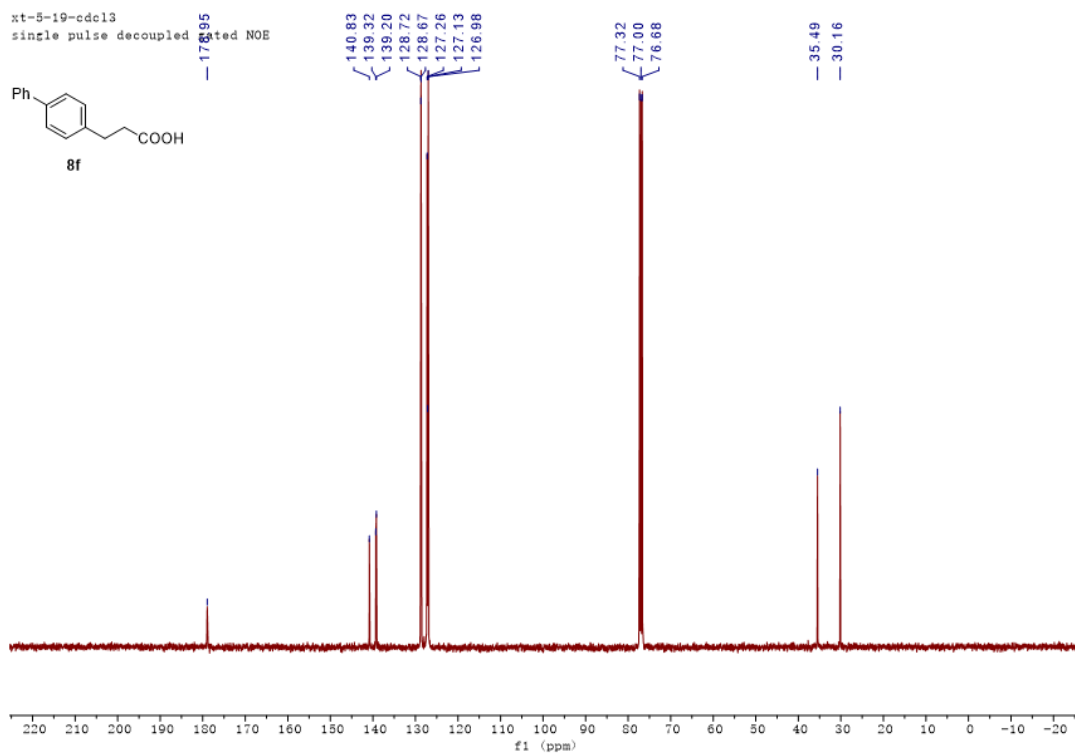

$^{13}\text{C}$  NMR (101 MHz,  $\text{CDCl}_3$ ) of **8f**

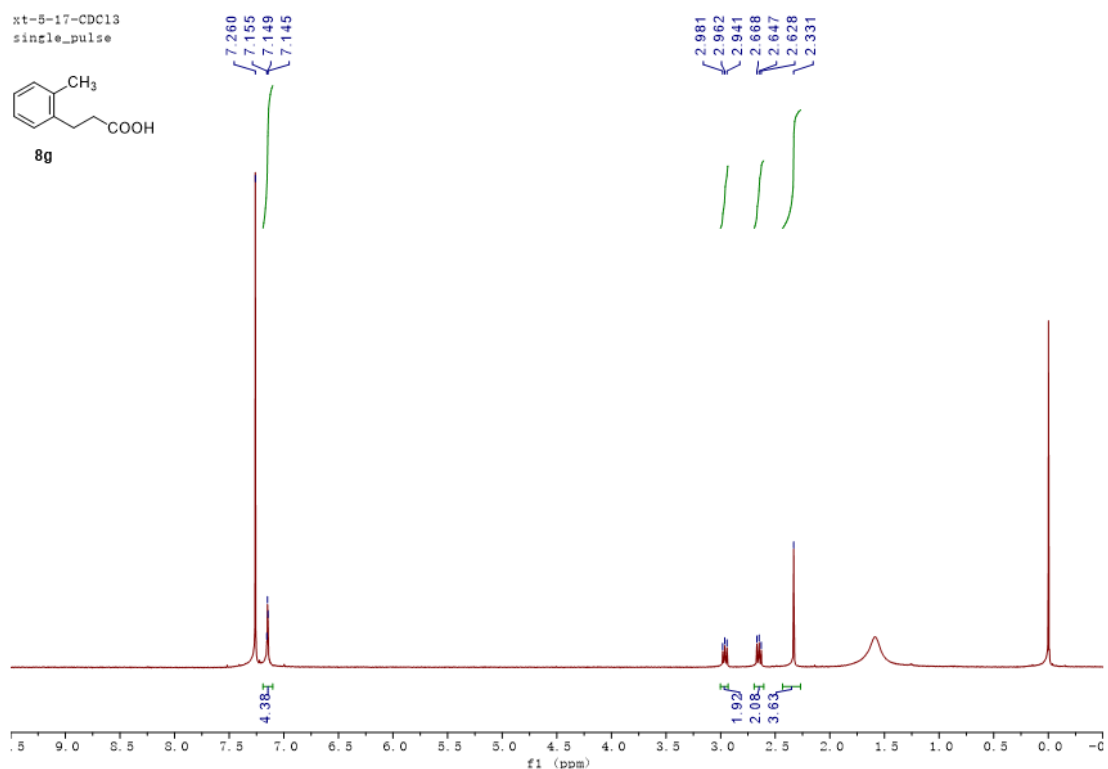

$^1\text{H}$  NMR (400 MHz,  $\text{CDCl}_3$ ) of **8g**

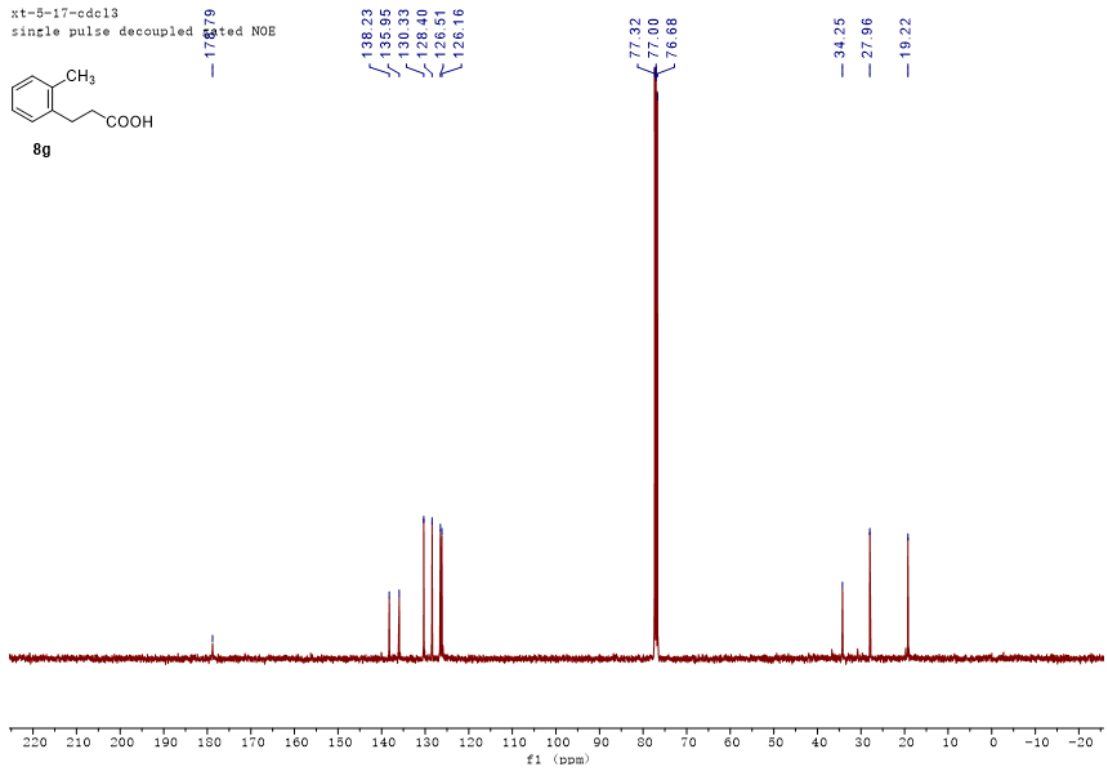

$^{13}\text{C}$  NMR (101 MHz,  $\text{CDCl}_3$ ) of **8g**

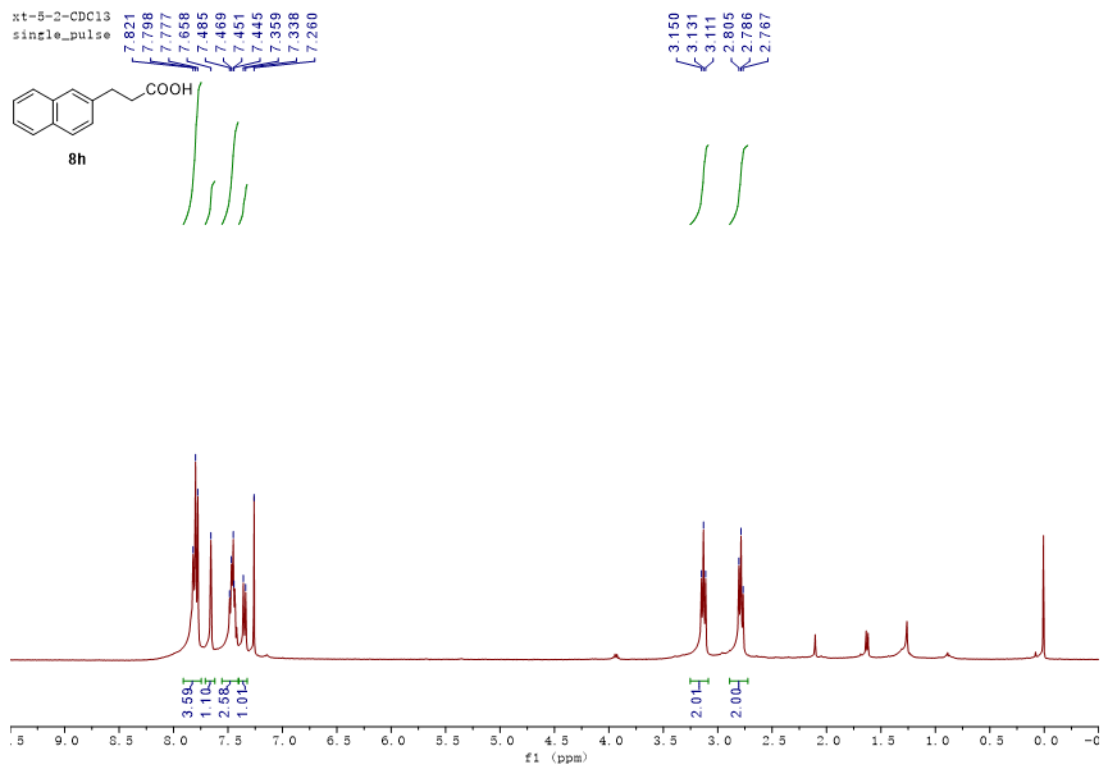

$^1\text{H}$  NMR (400 MHz,  $\text{CDCl}_3$ ) of **8h**

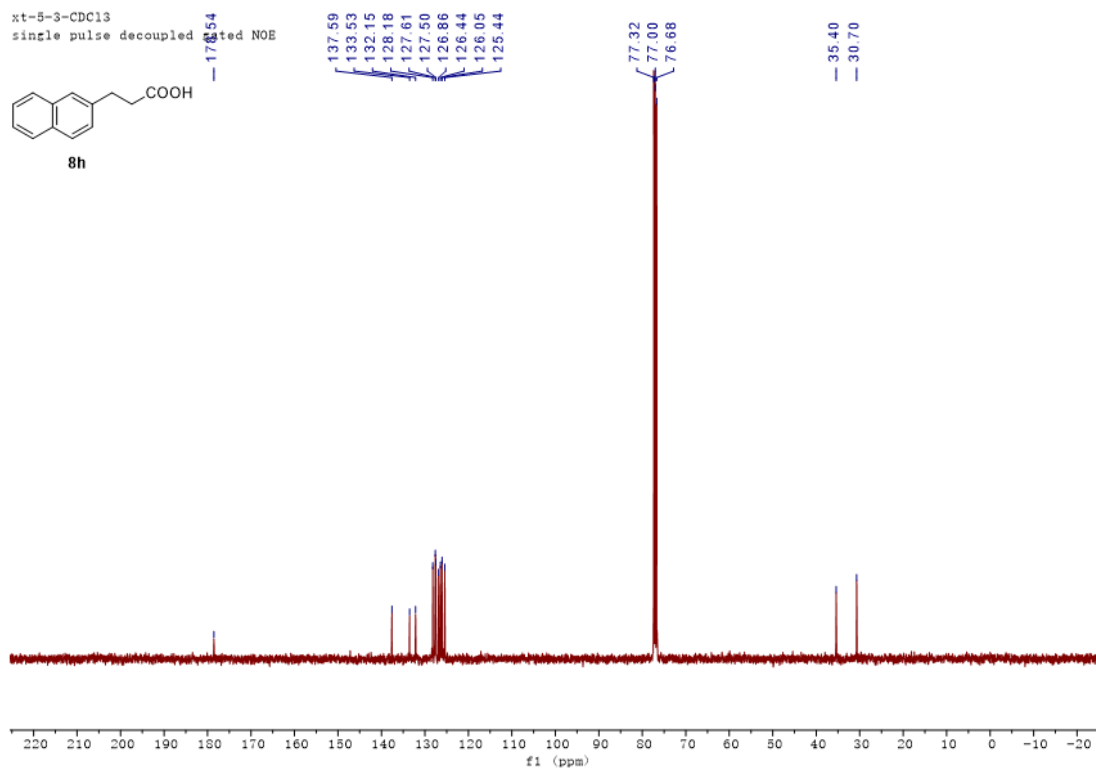

<sup>13</sup>C NMR (101 MHz, CDCl<sub>3</sub>) of **8h**

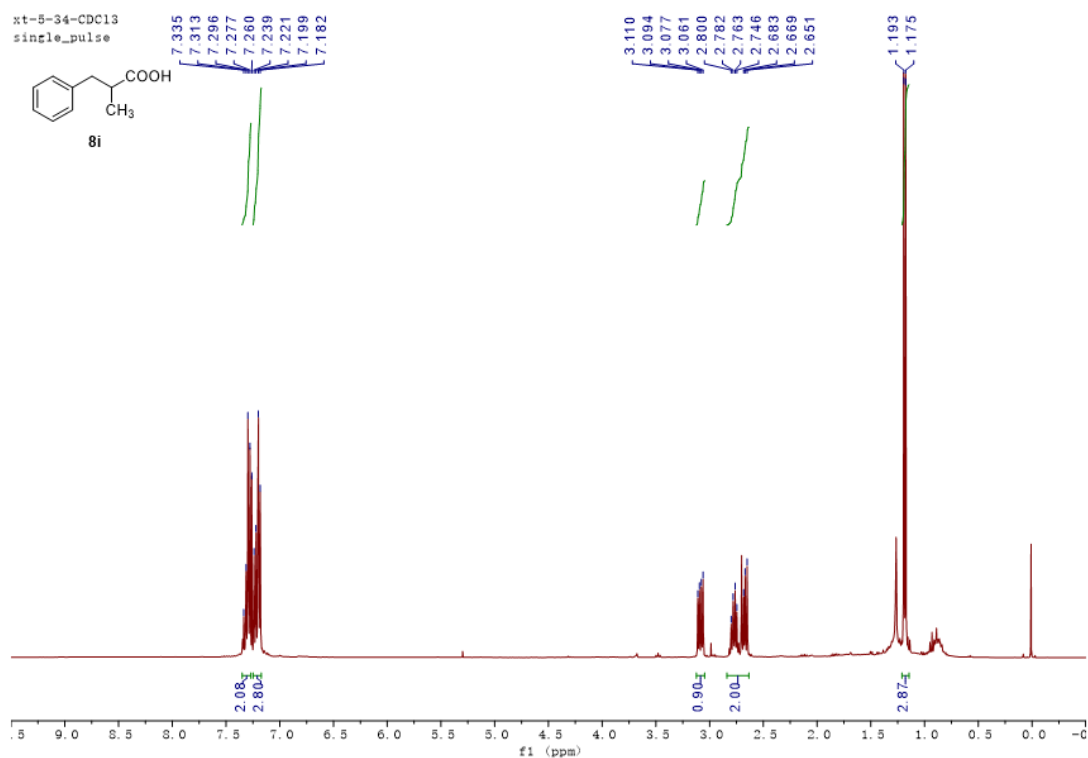

<sup>1</sup>H NMR (400 MHz, CDCl<sub>3</sub>) of **8i**

xt-5-34-cdc13  
single pulse decoupled NOE

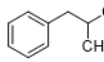

**8i**

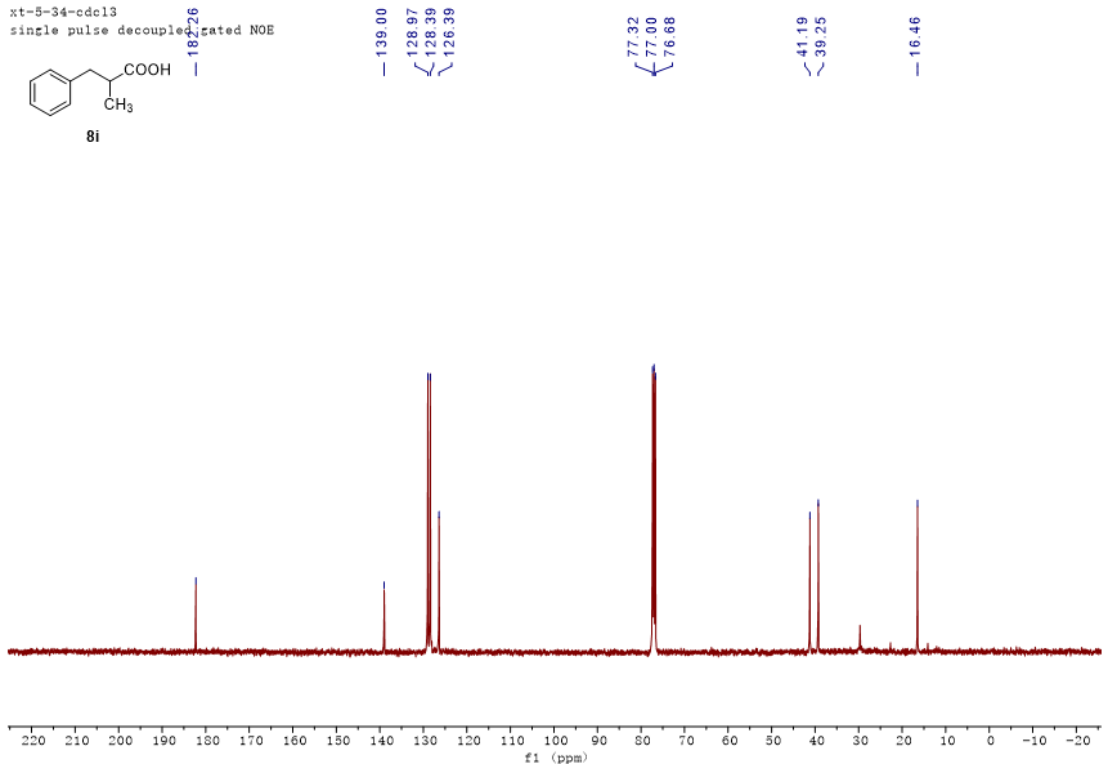

<sup>13</sup>C NMR (101 MHz, CDCl<sub>3</sub>) of **8i**

xt-5-68-CDCl3  
single\_pulse

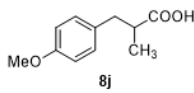

**8j**

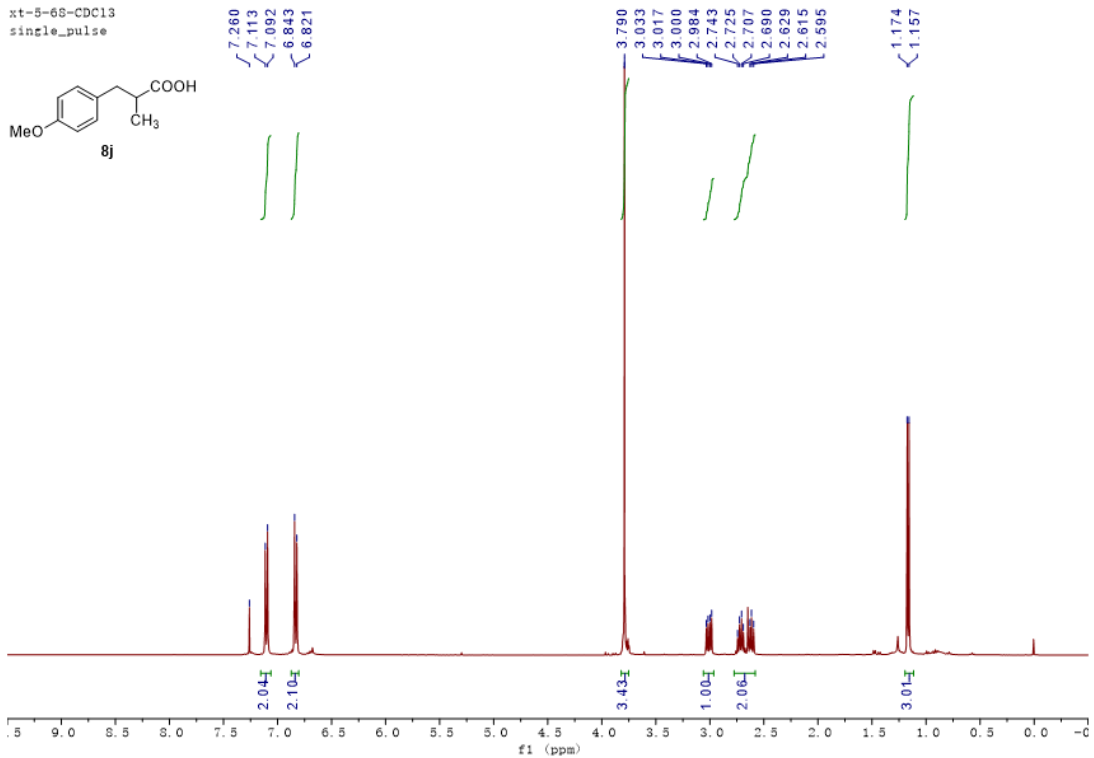

<sup>1</sup>H NMR (400 MHz, CDCl<sub>3</sub>) of **8j**

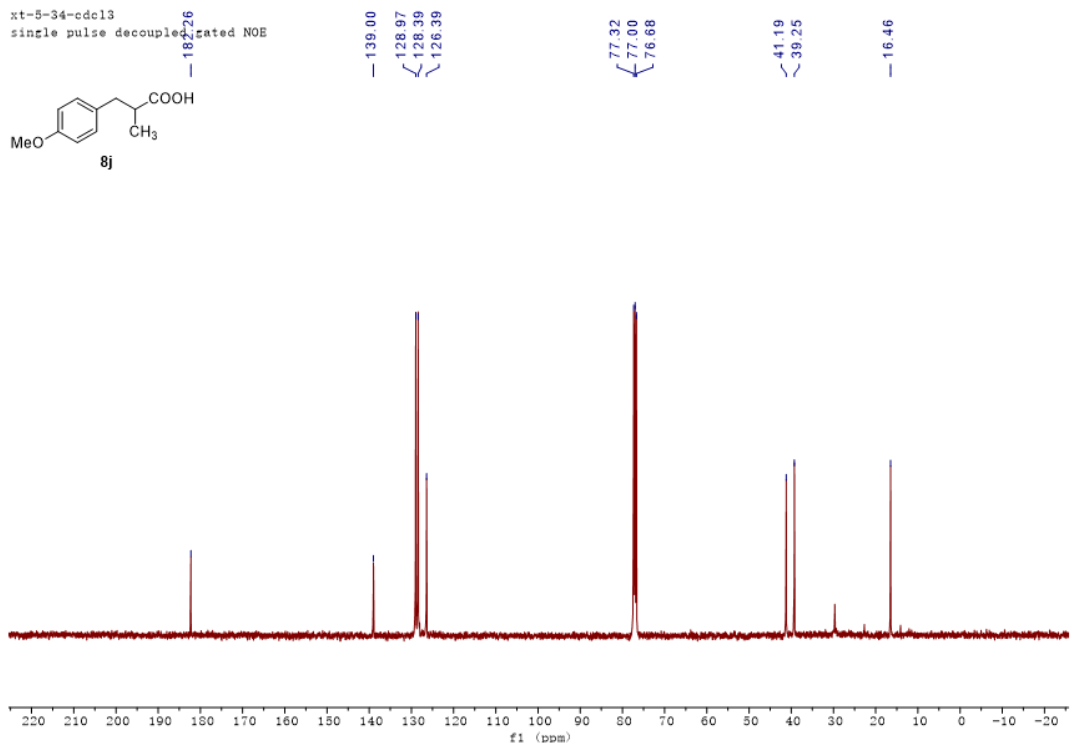

<sup>13</sup>C NMR (101 MHz, CDCl<sub>3</sub>) of **8j**

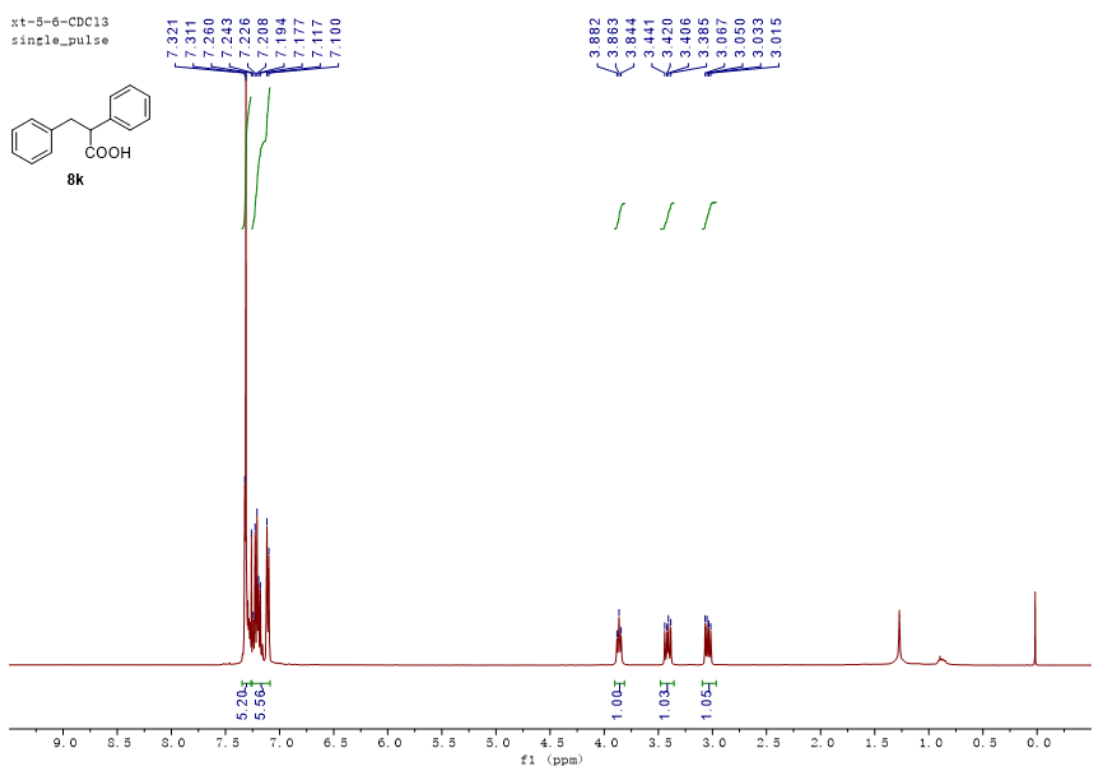

<sup>1</sup>H NMR (400 MHz, CDCl<sub>3</sub>) of **8k**

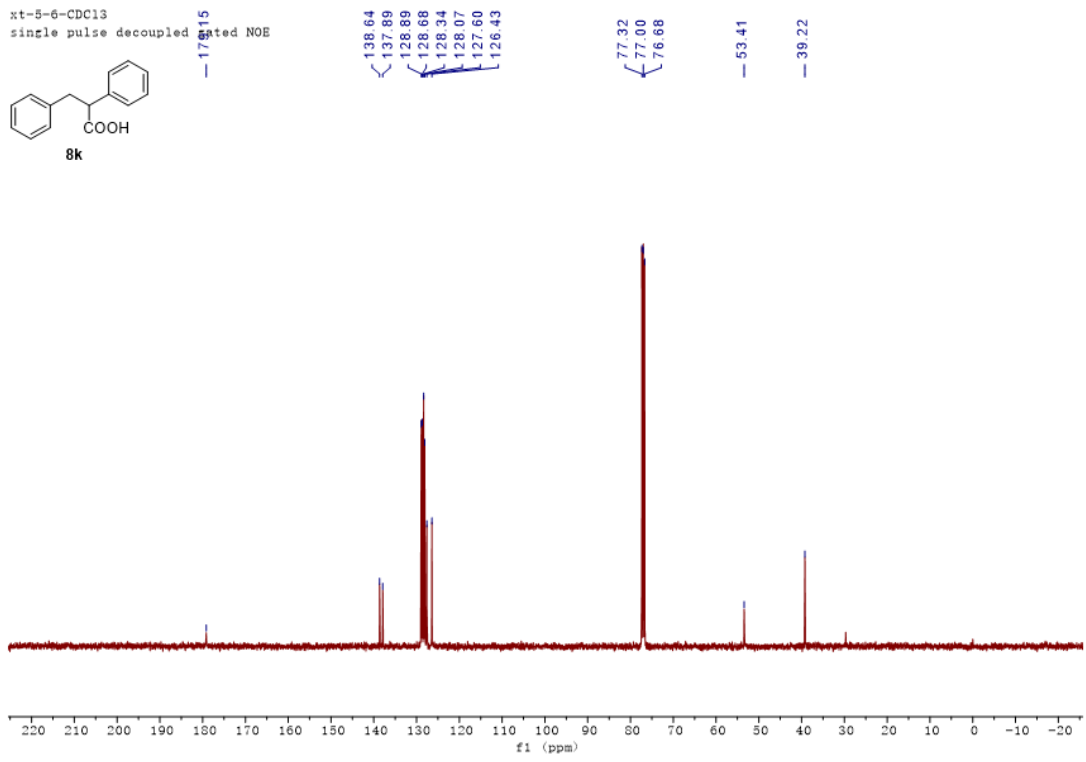

<sup>13</sup>C NMR (101 MHz, CDCl<sub>3</sub>) of **8k**

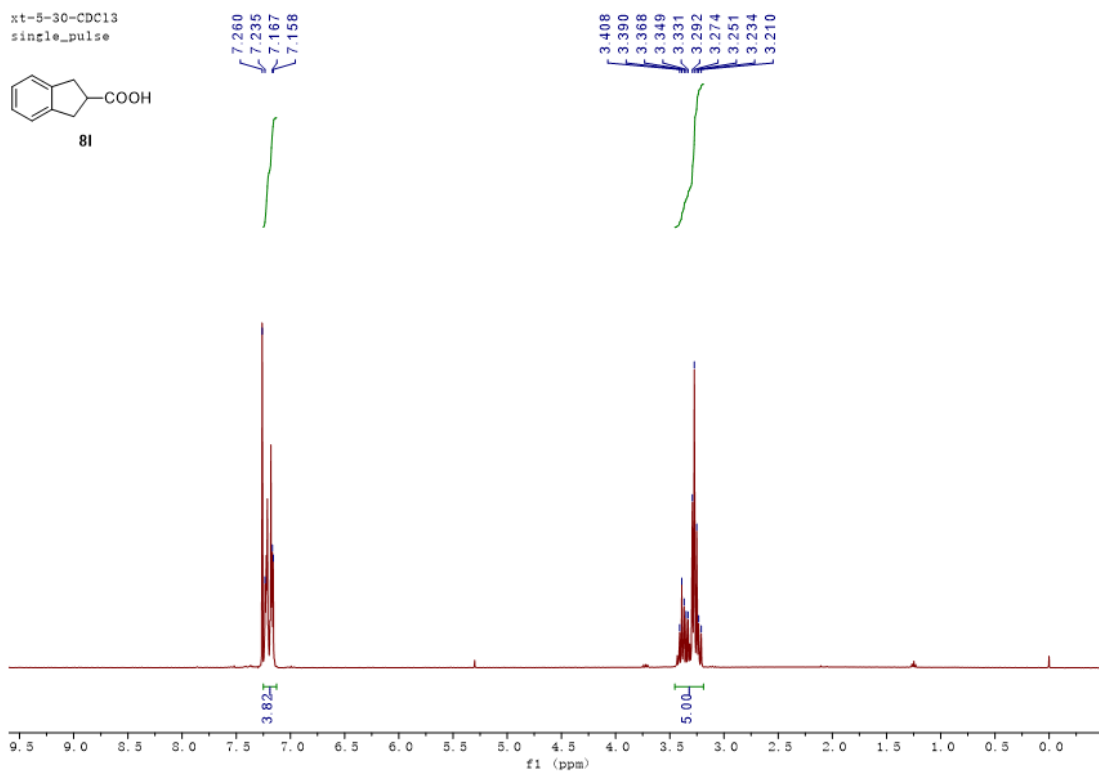

<sup>1</sup>H NMR (400 MHz, CDCl<sub>3</sub>) of **8l**

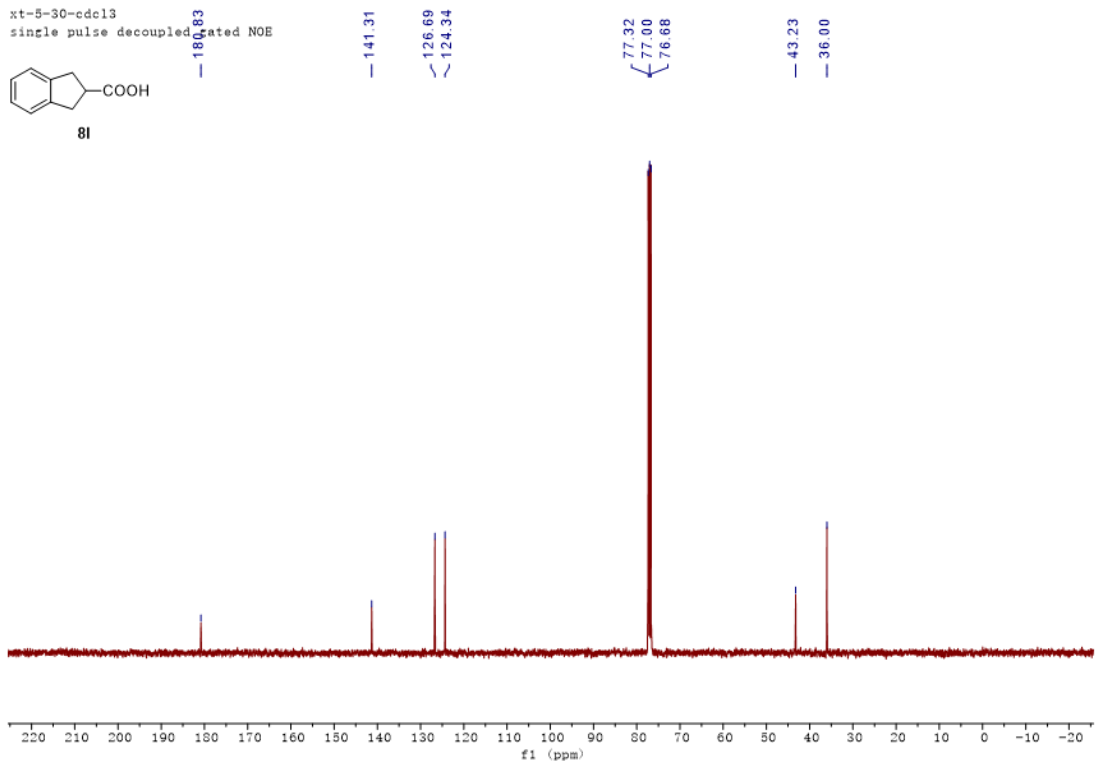

$^{13}\text{C}$  NMR (101 MHz,  $\text{CDCl}_3$ ) of **81**

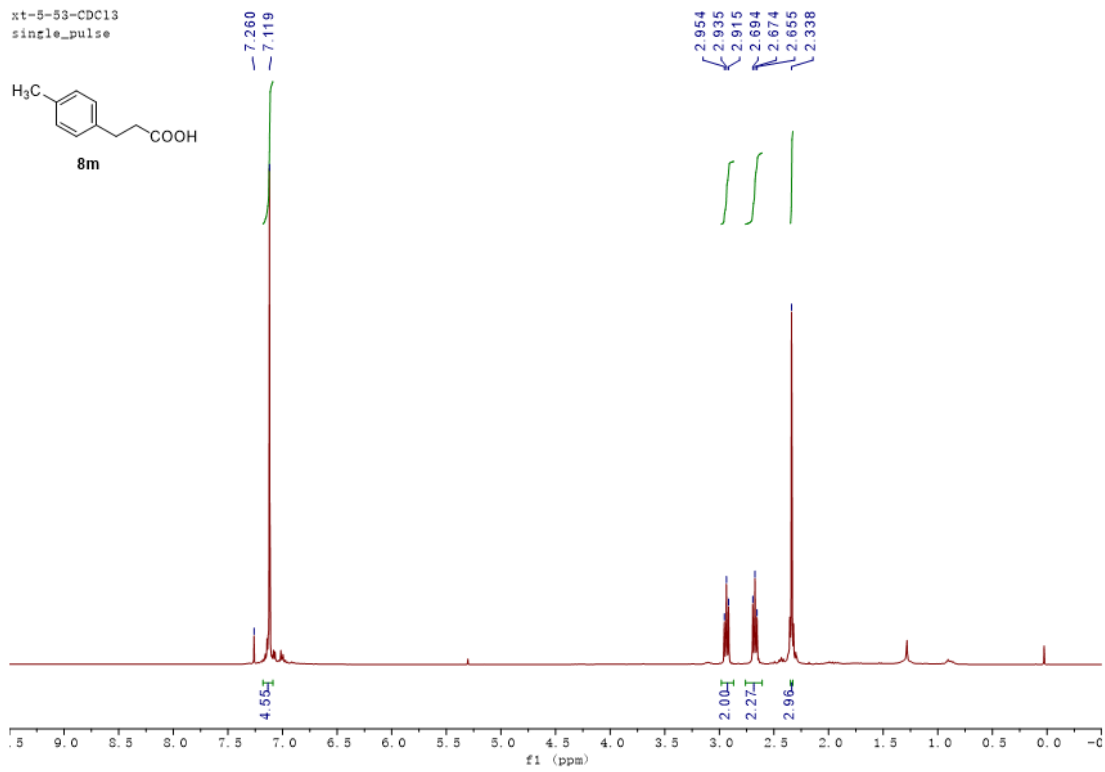

$^1\text{H}$  NMR (400 MHz,  $\text{CDCl}_3$ ) of **8m**



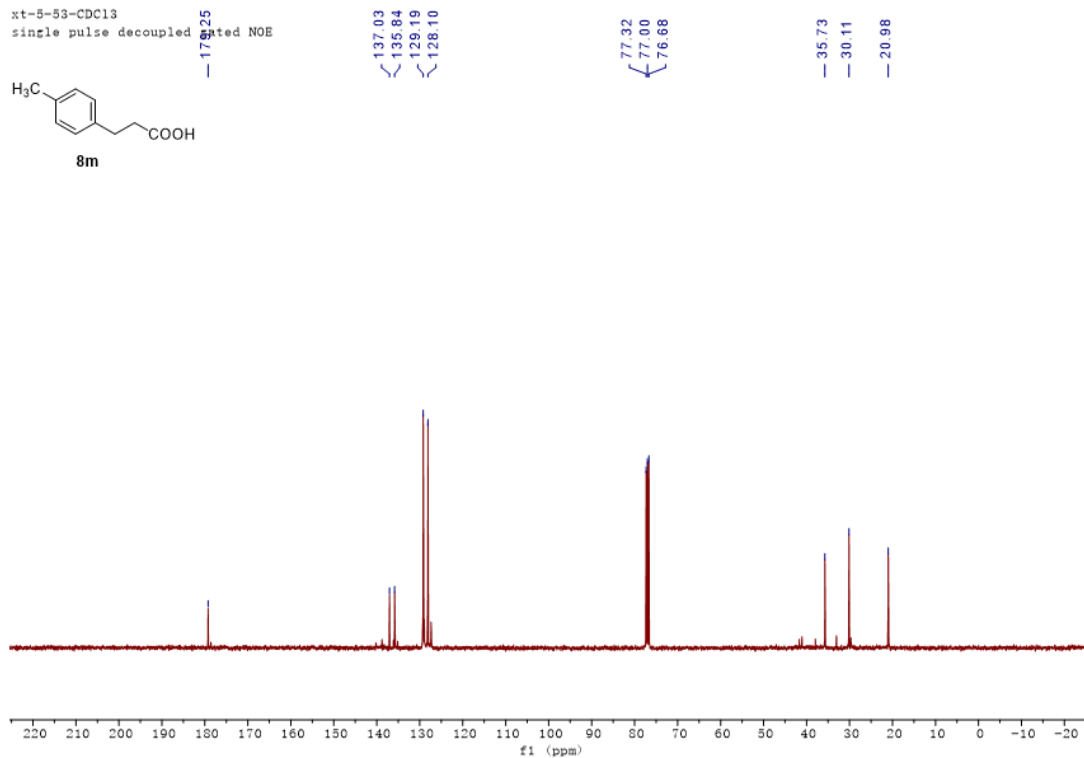

<sup>13</sup>C NMR (101 MHz, CDCl<sub>3</sub>) of **8m**

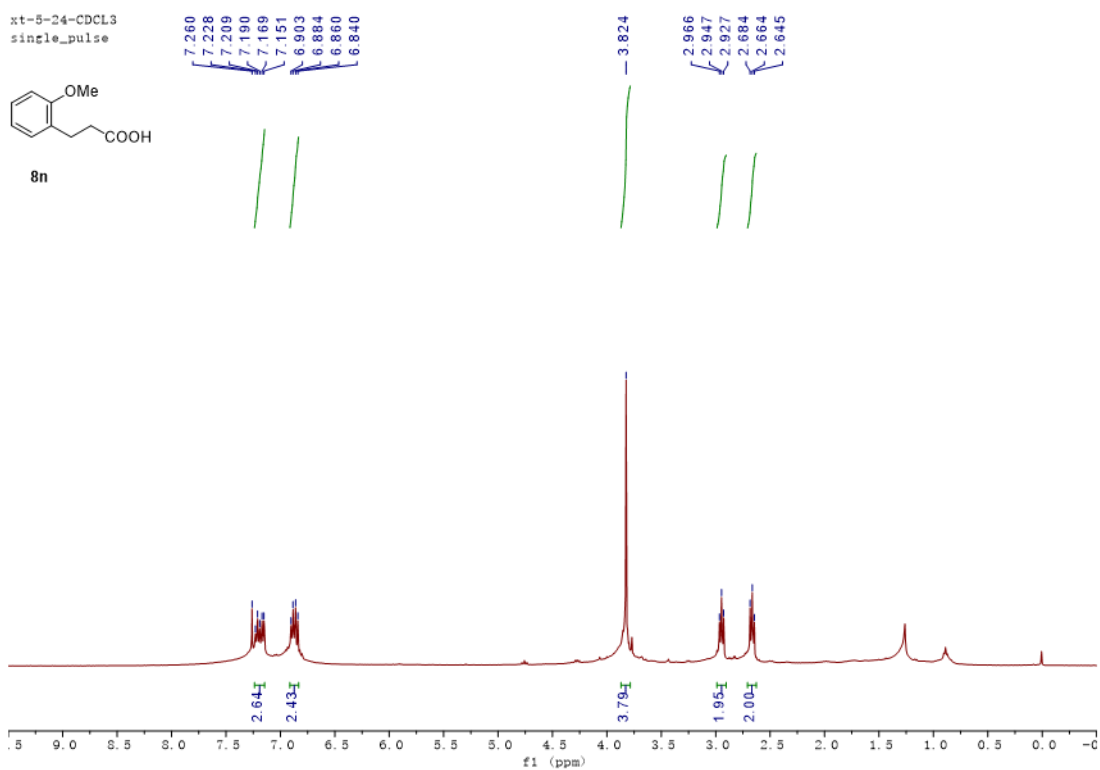

<sup>1</sup>H NMR (400 MHz, CDCl<sub>3</sub>) of **8n**

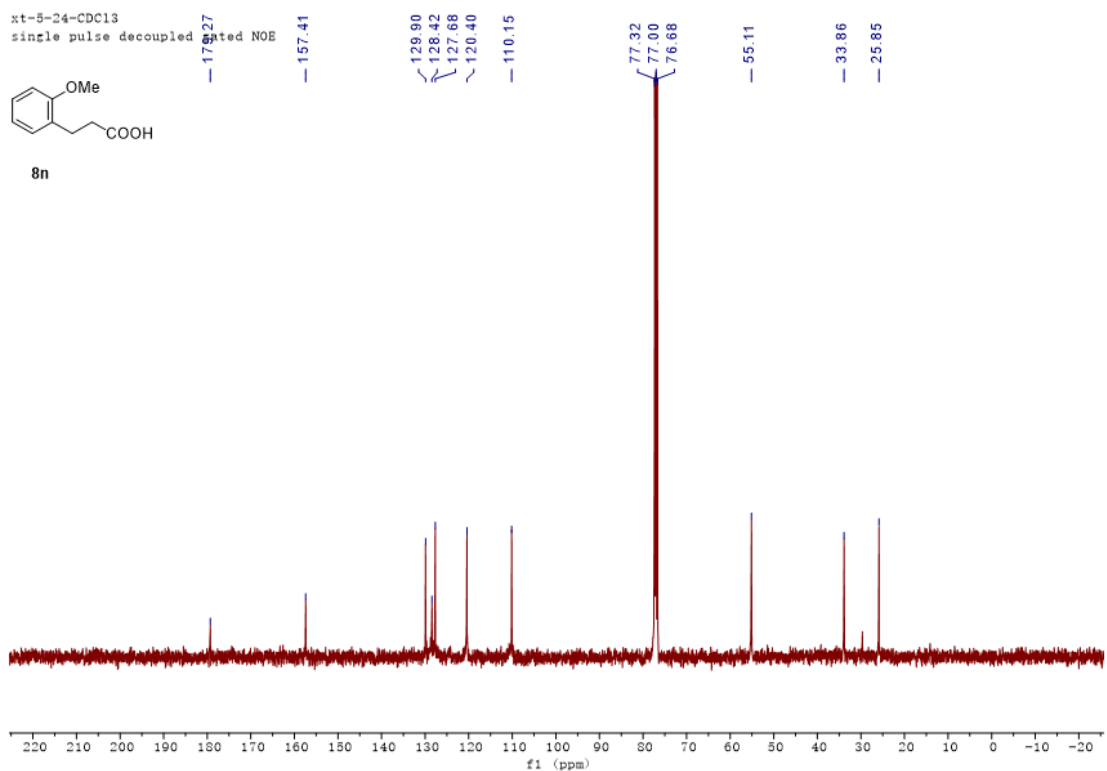

$^{13}\text{C}$  NMR (101 MHz,  $\text{CDCl}_3$ ) of **8n**

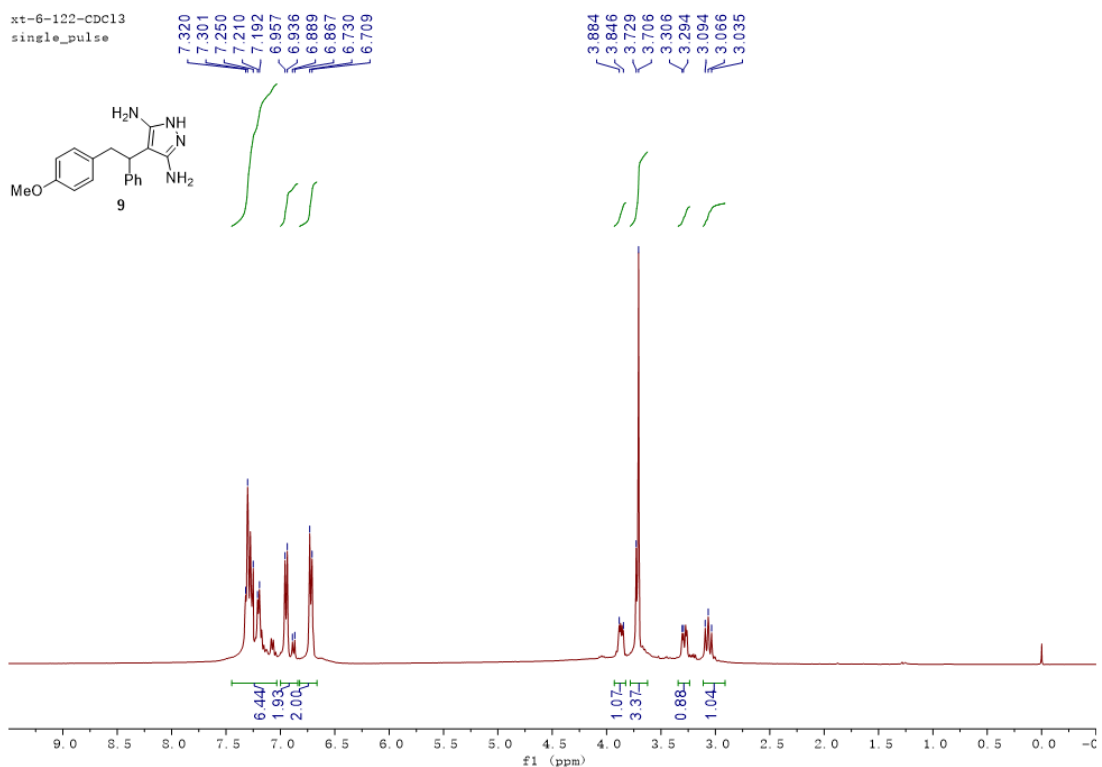

$^1\text{H}$  NMR (400 MHz,  $\text{CDCl}_3$ ) of **9**

xt-6-122-CDCl3 1  
single pulse decoupled gated NOE

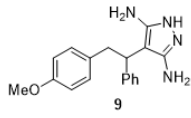

157.86  
148.86  
143.24  
132.66  
130.10  
128.50  
127.60  
126.34  
113.67  
92.78  
77.32  
77.00  
76.68  
55.12  
41.70  
38.31

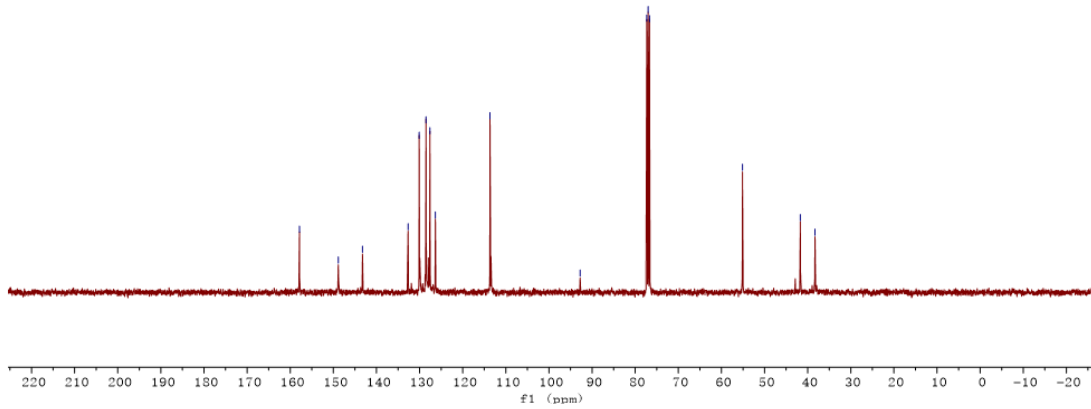

$^{13}\text{C}$  NMR (101 MHz,  $\text{CDCl}_3$ ) of **9**

xt-6-120-CDCl3  
single\_pulse

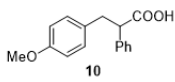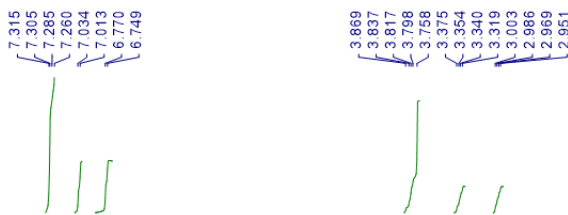

$^1\text{H}$  NMR (400 MHz,  $\text{CDCl}_3$ ) of **10**

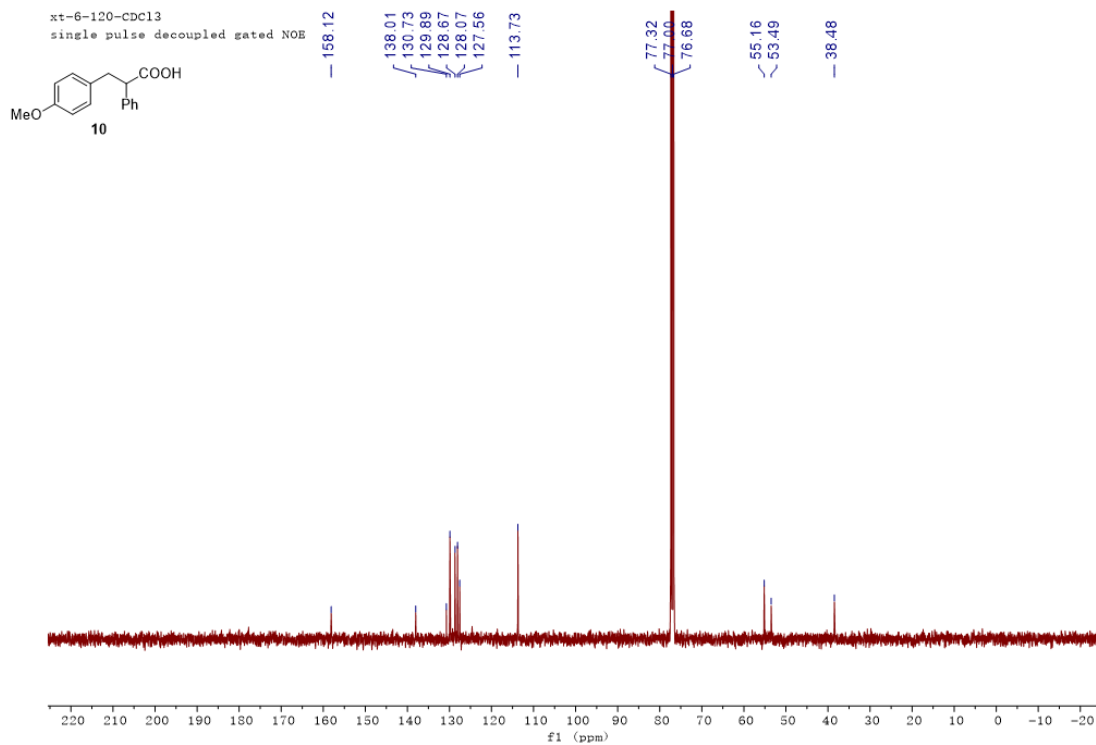

<sup>13</sup>C NMR (101 MHz, CDCl<sub>3</sub>) of **10**

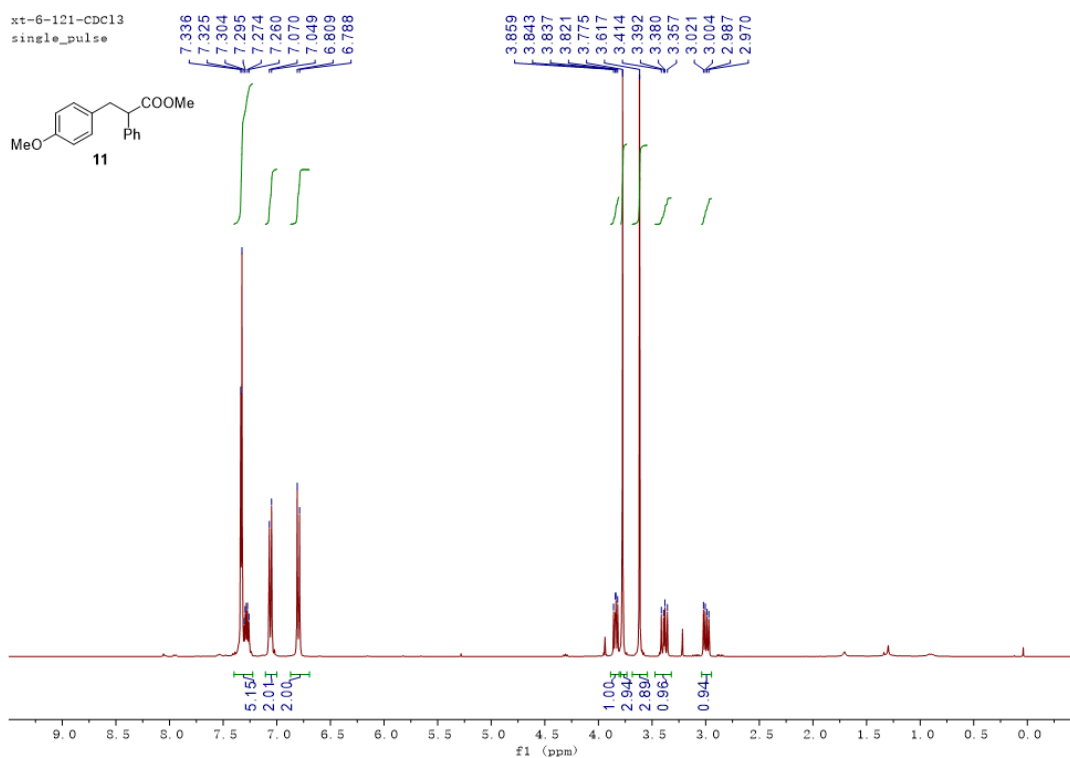

<sup>1</sup>H NMR (400 MHz, CDCl<sub>3</sub>) of **11**

xt-6-121  
single pulse decoupled gated NOE

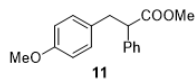

173.82  
158.02  
138.60  
130.99  
129.81  
128.55  
127.87  
127.27  
113.62  
77.32  
77.00  
76.86  
55.06  
53.80  
51.88  
38.91

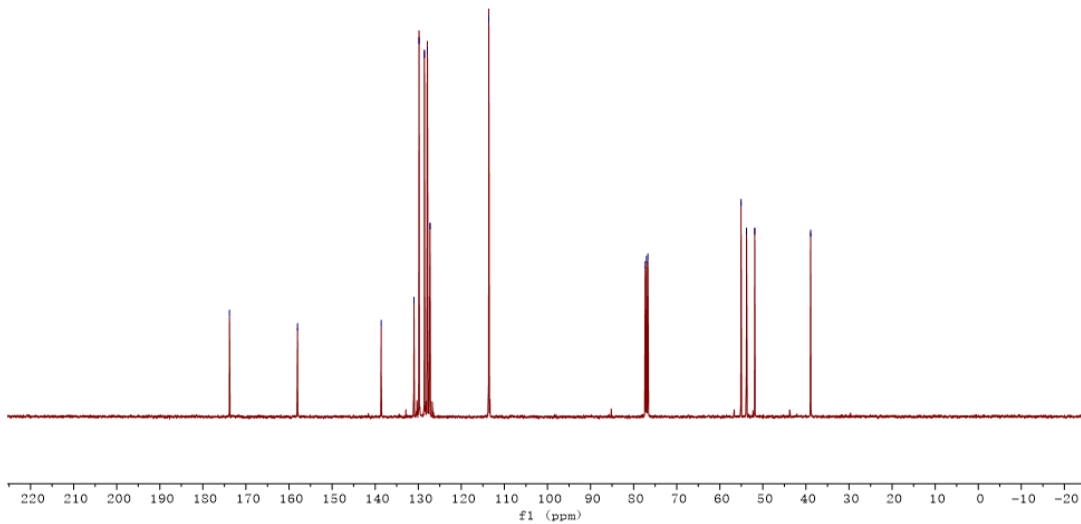

**<sup>13</sup>C NMR (101 MHz, CDCl<sub>3</sub>) of 11**

xt-6-124-CDCl3  
single\_pulse

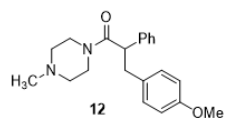

7.260  
7.244  
7.226  
7.200  
7.182  
7.161  
6.977  
6.955  
6.736  
6.715  
3.921  
3.903  
3.885  
3.712  
3.705  
3.670  
3.501  
3.461  
3.457  
3.426  
3.406  
3.392  
3.372  
3.301  
2.890  
2.874  
2.857  
2.840  
2.270  
2.250  
2.180  
2.150  
2.105  
1.969  
1.974  
1.961  
1.747  
1.734  
1.720

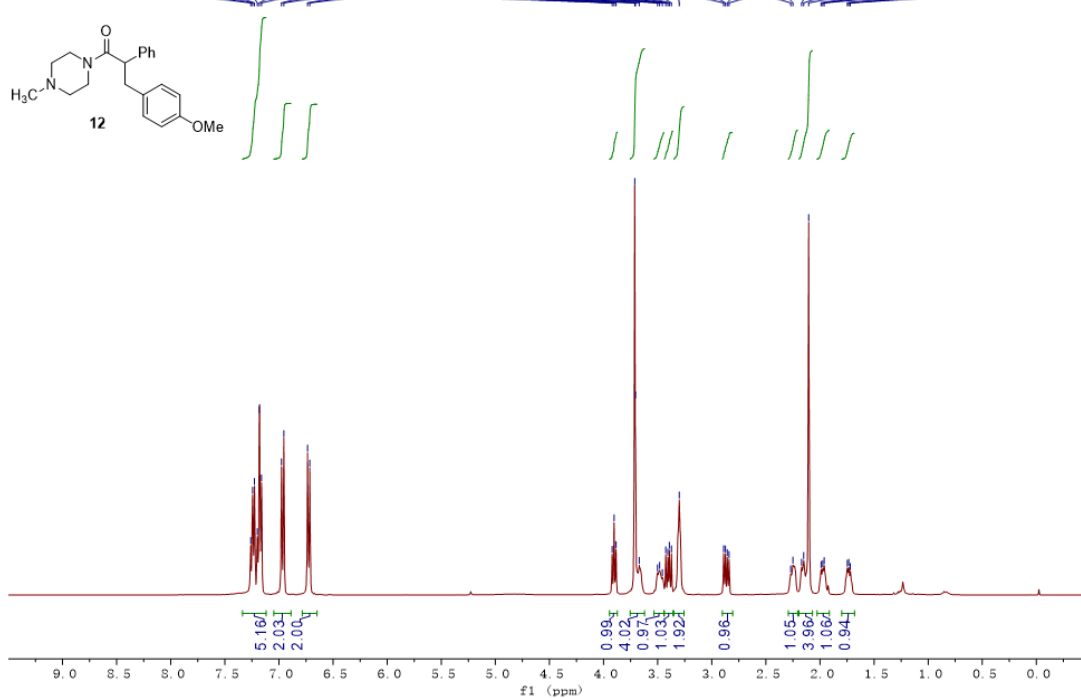

**<sup>1</sup>H NMR (400 MHz, CDCl<sub>3</sub>) of 12**

xt-6-124

single pulse decoupled gated NOE

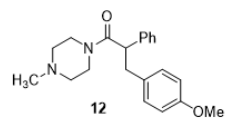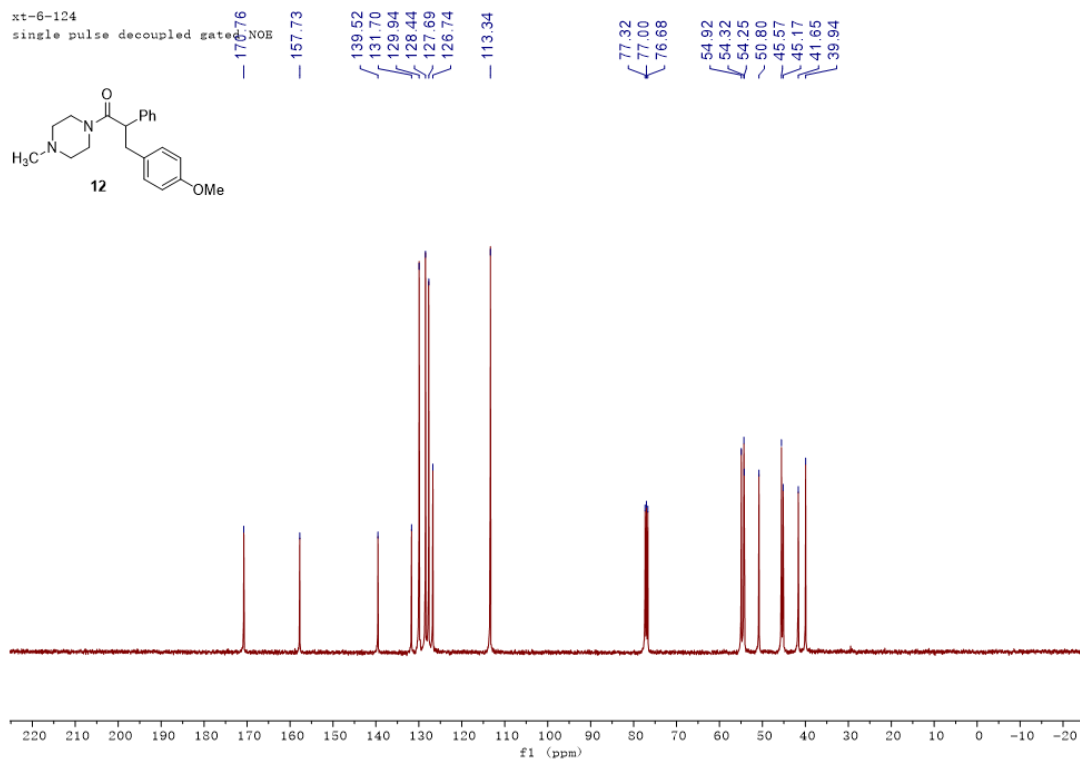

$^{13}\text{C}$  NMR (101 MHz,  $\text{CDCl}_3$ ) of **12**

## References

- (1) Meng, Q. Y., Lezius, L. & Studer, A. Benzylic C-H acylation by cooperative NHC and photoredox catalysis. *Nat. Commun.* **12**, 2068 (2021).
- (2) Zuo, W. et al. Amorphous zirconium metal-organic frameworks assembled from mixed porphyrins as solvent-free catalysts for Knoevenagel condensation. *Dalton. Trans.* **51**, 6631-6637 (2022).
- (3) Cheng, H. et al. Nickel-alkyne-functionalized metal-organic frameworks: An efficient and reusable catalyst. *Appl. Catal A-Gen.* **623**, 118216 (2021).
- (4) Lv, J., He, Z., Zhang, J., Guo, Y., Han, Z. & Bao, X. One-pot synthesis of [1,2,4]Triazolo[1,5-a]pyridines from azines and benzylidenemalononitriles via copper-catalyzed tandem cyclization. *Tetrahedron* **74**, 3996-4004 (2018).
- (5) Yuan, X., Wang, J., Wan, Z., Zhang, Q. & Luo, J. One-pot Suzuki coupling-Knoevenagel condensation tandem reaction catalyzed by a recyclable magnetic bifunctional catalyst. *ChemistrySelect* **6**, 1238-1243 (2021).
- (6) Xu, Z.-H. et al. Facile Access to saccharin-fused 1,4-dihydropyridines through [3+3] annulation reactions. *Eur. J. Org. Chem.* **7**, e202101423 (2022).
- (7) Zhu, T., Zhang, X.-J., Zhou, Z., Xu, Z., Ma, M. & Zhao, B. Synthesis of functionalized malononitriles via Fe-catalysed hydrogen atom transfers of alkenes. *Org. Biomol. Chem.* **20**, 1480-1487 (2022).
- (8) Gu, X. et al. New electron-donor/acceptor-substituted tetraphenylethylenes: aggregation-induced emission with tunable emission color and optical-waveguide behavior. *Chem. Asian. J.* **8**, 2362-2369 (2013).
- (9) Jadhav, S. N., Patil, S. P., Sahoo, D. P., Rath, D., Parida, K. & Rode, C. V. Organocatalytic cascade Knoevenagel-Michael addition reactions: direct synthesis of polysubstituted 2-amino-4*H*-chromene derivatives. *Catal. Lett.* **150**, 2331-2351 (2020).
- (10) Almáši, M., Zelenák, V., Opanasenko, M. V. & Čejka, J. Efficient and reusable Pb(II) metal-organic framework for Knoevenagel condensation. *Catal. Lett.* **148**, 2263-2273 (2018).
- (11) Huang, J., Hu, G., An, S., Chen, D., Li, M. & Li, P. Synthesis of N-alkylpyridin-4-ones and thiazolo[3,2-*a*]pyridin-5-ones through pummerer-type reactions. *J. Org. Chem.* **84**, 9758-9769 (2019).

- (12) Gaussian 16, Revision A.03, Frisch, M. J. G., Trucks, W., Schlegel, H. B., Scuseria, G. E., Robb, M. A., Cheeseman, J. R., Scalmani, G., Barone, V., Petersson, G. A., Nakatsuji, H., Li, X., Caricato, M., Marenich, A. V., Bloino, J., Janesko, B. G., Gomperts, R., Mennucci, B., Hratchian, H. P., Ortiz, J. V., Izmaylov, A. F., Sonnenberg, J. L., Williams-Young, D., Ding, F., Lipparini, F., Egidi, F., Goings, J., Peng, B., Petrone, A., Henderson, T., Ranasinghe, D., Zakrzewski, V. G., Gao, J., Rega, N., Zheng, G., Liang, W., Hada, M., Ehara, M., Toyota, K., Fukuda, R., Hasegawa, J., Ishida, M., Nakajima, T., Honda, Y., Kitao, O., Nakai, H., Vreven, T., Throssell, K., Montgomery, J. A. Jr., Peralta, J. E., Ogliaro, F., Bearpark, M. J., Heyd, J. J., Brothers, E. N., Kudin, K. N., Staroverov, V. N., Keith, T. A., Kobayashi, R., Normand, J., Raghavachari, K., Rendell, A. P., Burant, J. C., Iyengar, S. S., Tomasi, J., Cossi, M., Millam, J. M., Klene, M., Adamo, C., Cammi, R., Ochterski, J. W., Martin, R. L., Morokuma, K., Farkas, O., Foresman, J. B. & Fox, D. J. Gaussian, Inc., Wallingford CT (2016).
- (13) Yanai, T., Tew, D. P. & Handy, N. C. A new hybrid exchange–correlation functional using the Coulomb-attenuating method (CAM-B3LYP). *Chem. Phys. Lett.* **393**, 51-57 (2004).
- (14) Lu, T. & Chen, F. Multiwfn: a multifunctional wavefunction analyzer. *J. Comput. Chem.* **33**, 580-592 (2012).
- (15) Liu, Z., Lu, T. & Chen, Q. An sp-hybridized all-carboatomic ring, cyclo[18]carbon: Electronic structure, electronic spectrum, and optical nonlinearity. *Carbon* **165**, 461-467 (2020).
- (16) Capaldo, L., Buzzetti, L., Merli, D., Fagnoni, M. & Ravelli, D. Smooth photocatalyzed benzylation of electrophilic olefins via decarboxylation of arylacetic acids. *J. Org. Chem.* **81**, 7102-7109 (2016).
- (17) Feng, G., Wang, X. & Jin, J. Decarboxylative C-C and C-N bond formation by ligand-accelerated iron photocatalysis. *Eur. J. Org. Chem.* **39**, 6728-6732 (2019).
- (18) Huang, Y., Hou, J., Zhan, L.-W., Zhang, Q., Tang, W.-Y. & Li, B.-D., Photoredox activation of formate salts: hydrocarboxylation of alkenes via carboxyl group transfer. *ACS Catal.* **11**, 15004-15012 (2021).
- (19) Banks, T. M., Clay, S. F., Glover, S. A. & Schumacher, R. R., Mutagenicity of N-acyloxy-N-alkoxyamides as an indicator of DNA intercalation part 1: evidence for naphthalene as a DNA intercalator. *Org. Biomol. Chem.* **14**, 3699-3714 (2016).
- (20) Wang, Q. et al. Iridium catalysts with modular axial-unfixed biphenyl phosphine–oxazoline ligands: asymmetric hydrogenation of  $\alpha,\beta$ -unsaturated carboxylic acids. *Org. Chem. Front.* **4**, 627-630 (2017).



- (21) Seo, H., Liu, A. & Jamison, T. F. Direct  $\beta$ -Selective hydrocarboxylation of styrenes with CO<sub>2</sub> enabled by continuous flow photoredox catalysis. *J. Am. Chem. Soc.* **139**, 13969-13972 (2017).
- (22) Lim, M. et al. Pd nanoparticles dispersed on solid supports: synthesis, characterization and catalytic activity on selective hydrogenation of olefins in aqueous media. *Appl. Organometal. Chem.* **25**, 1-8 (2011).
- (23) Yang, S. et al. Enantioselective Iridium-catalyzed hydrogenation of  $\alpha$ -arylcinnamic acids and synthesis of (S)-equol. *Tetrahedron* **68**, 5172-5178 (2012).
- (24) Davies, H. M. L. & Jin, Q. Intermolecular C–H activation at benzylic positions: synthesis of (+)-imperanene and (–)- $\alpha$ -conidendrin. *Tetrahedron: Asymmetry* **14**, 941-949 (2003).
